# Supplementary material for: Palladium catalyzed stereoselective intramolecular [3 + 2] cycloaddition reactions of (E) & (Z)-ene-vinylidenecyclopropanes
Source: Royal Society of Chemistry journal article supplement (doi:10.1039/d4ob00607k), 2024-01-01
Supplement: d4ob00607k1.pdf [file d4ob00607k1.pdf]

# Supporting Information

## Palladium Catalyzed Stereoselective Intramolecular [3+2] Cycloaddition Reactions of (*E*) & (*Z*)-Ene-Vinylidenecyclopropanes

Chao Ning,<sup>a</sup> Zi-Qi Yu,<sup>a</sup> Yin Wei,<sup>\*b</sup> and Min Shi<sup>\*a,b</sup>

<sup>a</sup> Key Laboratory for Advanced Materials and Institute of Fine Chemicals, Key Laboratory for Advanced Materials and Feringa Nobel Prize Scientist Joint Research Center, School of Chemistry & Molecular Engineering, East China University of Science and Technology, Meilong Road No.130, Shanghai, 200237 (China), <sup>b</sup> State Key Laboratory of Organometallic Chemistry, Center for Excellence in Molecular Synthesis, University of Chinese Academy of Sciences, Shanghai Institute of Organic Chemistry, Chinese Academy of Sciences, 345 Lingling Road, Shanghai 200032, P. R. China. mshi@mail.sioc.ac.cn, weiyin@sioc.ac.cn

### Table of Contents

|    |                                                                                |      |
|----|--------------------------------------------------------------------------------|------|
| 1. | General remarks.....                                                           | S2   |
| 2. | General procedures for the synthesis of substrates <b>1</b> and <b>3</b> ..... | S3   |
| 3. | Optimization of reaction conditions .....                                      | S6   |
| 4. | General procedure for the synthesis of <b>2</b> and <b>4</b> .....             | S7   |
| 5. | Gram scale reaction and synthetic transformations .....                        | S8   |
| 6. | Spectroscopic data .....                                                       | S10  |
| 7. | Computational studies.....                                                     | S180 |
| 8. | X-Ray structures .....                                                         | S211 |
| 9. | References .....                                                               | S213 |

## 1. General remarks

$^1\text{H}$ ,  $^{13}\text{C}$  and  $^{19}\text{F}$  NMR spectra were recorded at 400 MHz or 600 MHz, 100 MHz or 150 MHz and 376 MHz, respectively. HRMS spectra were recorded by EI, ESI, FI method. Infrared spectra were recorded on a Perkin-Elmer PE-983 spectrometer with absorption in  $\text{cm}^{-1}$ . Mass spectra were recorded by EI, ESI, and HRMS was measured on an Agilent Technologies 6224 TOF LC/MS instrument and a Waters Micromass GCT Permier. Melting points were determined on a digital melting point apparatus and temperatures were uncorrected. X-ray structure was determined on a Bruker Smart-1000 X-ray Diffraction meter. The employed solvents were dried up by standard methods when necessary. Commercially obtained reagents were used without further purification. All reactions were monitored by TLC plate analysis with silica gel coated plates (Huanghai GF254). Flash column chromatography was performed by using 300-400 mesh silica gel eluting with ethyl acetate and petroleum ether at increased pressure. Chiral HPLC was performed on a SHIMADZU SPD-10A *vp* series with chiral columns (Chiralpak AD-H columns  $4.6 \times 250$  mm, (Daicel Chemical Ind., Ltd.)).

## 2. General procedures for the synthesis of substrates **1** and **3**<sup>1, 2, 3</sup>

### Synthesis of substrates **1a-1z** and **3a-3m**

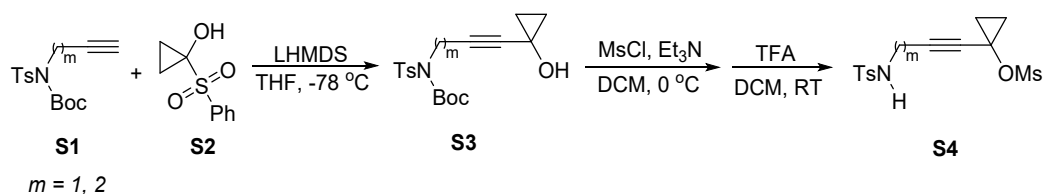

To the solution of compound **S1** (20 mmol) in THF (30 mL) was added LHMDS (22 mmol, 1.0 M in THF) within 20 min at  $-78\text{ }^{\circ}\text{C}$  under argon. The resulting solution was allowed to stir at  $-78\text{ }^{\circ}\text{C}$  for 0.5 h before a solution of **S2** (10 mmol) in THF (10 mL) was added into the above mixture. Consequently, the reaction mixture was allowed to warm up to room temperature and was stirred for 8.0 h. Then, saturated  $\text{NH}_4\text{Cl}$  solution was added to quench the reaction. Extracted with ethyl ether, dried over anhydrous  $\text{Na}_2\text{SO}_4$ , filtered, the organic phase was purified by a flash column chromatography on silica gel to give the corresponding product **S3** (PE/EA: 4:1~2:1).

Under argon atmosphere, compound **S3** (4.0 mmol) was dissolved in DCM (10.0 mL) at  $0\text{ }^{\circ}\text{C}$ ,  $\text{Et}_3\text{N}$  (8.0 mmol) and MsCl (6.0 mmol) was added. After stirring for 1.0 h, the reaction was quenched with  $\text{H}_2\text{O}$  (10.0 mL), extracted with DCM (10 mL x 3), and dried over anhydrous  $\text{Na}_2\text{SO}_4$ . The solvent was removed under reduced pressure and the residue was transferred into a 50 mL flask with 10 mL DCM. Then, trifluoroacetic acid (TFA, 40 mmol) was added dropwise. After stirring for 12 h, the reaction was quenched with saturated  $\text{Na}_2\text{CO}_3$  solution, extracted with DCM (10 mL x 3), and dried over anhydrous  $\text{Na}_2\text{SO}_4$ . The solvent was removed under reduced pressure and the residue was purified by a flash column chromatography ( $\text{SiO}_2$ ) to give the corresponding product **S4** (PE/EA: 4:1~1:1).

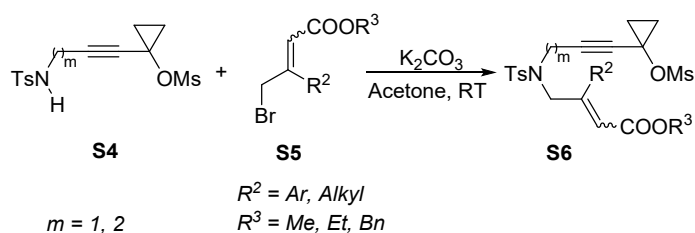

To the solution of **S4** (1.5 mmol) and  $K_2CO_3$  (1.8 mmol) in acetone (10 mL) was added **S5** (1.8 mmol). The resulting solution was allowed to stir at room temperature for 8.0 h. Then,  $H_2O$  was added to quench the reaction. The reaction mixture was extracted with EA twice, dried over anhydrous  $Na_2SO_4$ . The solvent was removed under reduced pressure and the residue was purified by a flash column chromatography ( $SiO_2$ ) to give the corresponding product **S6** for two steps (PE/EA: 4:1~2:1).

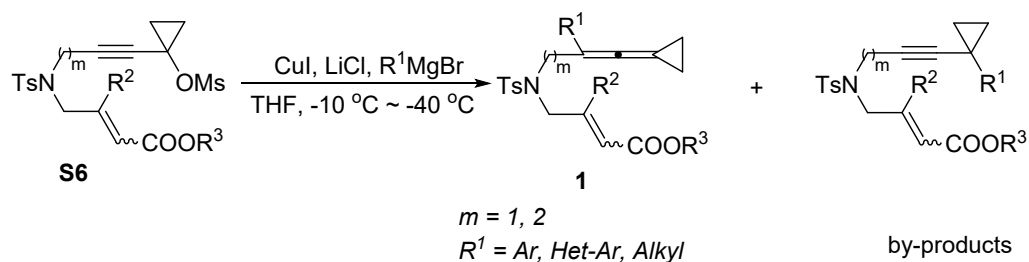

Unsuccessful examples

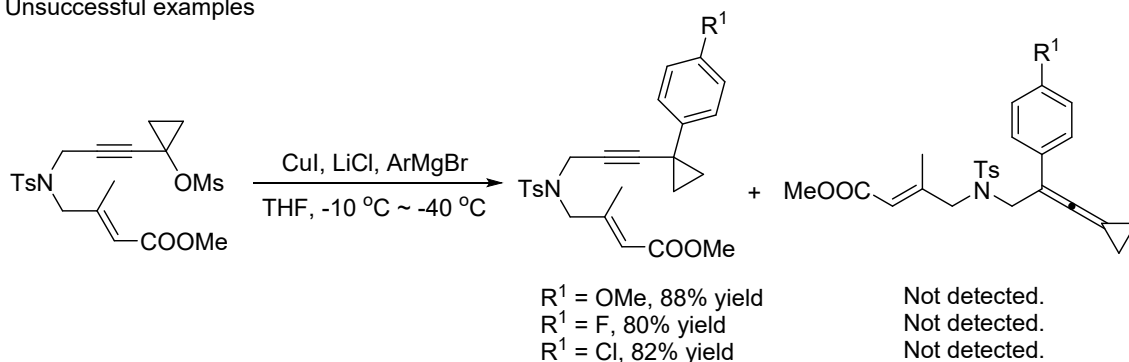

Under argon atmosphere,  $CuI$  (2.2 mmol) and  $LiCl$  (2.2 mmol) in a three-necked bottle was dried upon heating. Then THF (10 mL) was added. At  $-5\text{ }^\circ C$ ,  $R^1MgBr$  (1.0 mol/L in THF, 2.0 mmol, 2.0 mL) was added to the reaction mixture. 10 minutes later, the flask was moved into a  $-40\text{ }^\circ C$  bath and stirred for a while before a solution of **S6** (1.0 mmol) in THF (10 mL) was added dropwise into the above flask. After stirring at  $-40\text{ }^\circ C$  for 8.0 h, the reaction was quenched with saturated  $NH_4Cl$  solution, extracted with EA (10 mL x 3), and dried over anhydrous  $Na_2SO_4$ . The solvent was removed under reduced pressure and the residue was purified by a flash column chromatography ( $SiO_2$ ) to give the corresponding product **1** (PE/EA: 10:1). However, during the preparation of some substrates, by-products are inevitably generated. It is difficult to separate this pair of isomers by column chromatography. Fortunately, the by-products do not affect the addition reaction.

Trace of by-products exists in these substrates (**11**, **1m**, **1o**, **1y**, **1aa**, **3f**, and **3m**), which is difficult to separate. We did not label the byproducts in the spectra. We also attempted to synthesize substrates

bearing electron-withdrawing substituents such as OMe, F, Cl at the benzene ring. However, we only obtained the by-products instead of ene-VDCPs (Unsuccessful examples).

### 3. Optimization of reaction conditions.

**Table S1.** Optimization of the palladium-catalyzed [3+2] cycloaddition of (*Z*)-ene-vinylidenecyclopropane **3a** for product **4a**.

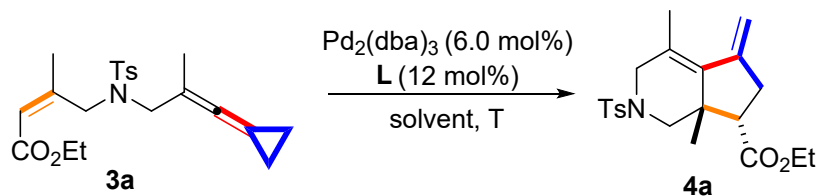

| Entry <sup>a</sup> | Catalyst                                      | L                          | Solvent        | T (°C)     | Yield/% <sup>b</sup> |
|--------------------|-----------------------------------------------|----------------------------|----------------|------------|----------------------|
| 1                  | $\text{Pd}_2(\text{dba})_3$                   | <sup>t</sup> BuXPhos       | toluene        | 100        | -                    |
| 2                  | $\text{Pd}_2(\text{dba})_3$                   | <sup>t</sup> BuXPhos       | toluene        | 110        | 68                   |
| <b>3</b>           | <b><math>\text{Pd}_2(\text{dba})_3</math></b> | <b><sup>t</sup>BuXPhos</b> | <b>toluene</b> | <b>120</b> | <b>94</b>            |
| 4                  | $\text{Pd}_2(\text{dba})_3$                   | <sup>t</sup> BuXPhos       | dioxane        | 120        | 82                   |
| 5                  | $\text{Pd}_2(\text{dba})_3$                   | <sup>t</sup> BuXPhos       | DCE            | 120        | 70                   |
| 6                  | $\text{Pd}_2(\text{dba})_3$                   | <sup>t</sup> BuXPhos       | PhCl           | 120        | 72                   |

[a] Reaction condition: substrate **3a** (0.10 mmol),  $\text{Pd}_2(\text{dba})_3$  (6 mol%) and **L** (12 mol%) in 1.0 mL anhydrous toluene under argon atmosphere for 8.0 h, [b] Isolated yield.

#### 4. General procedure for the synthesis of **2** and **4**.

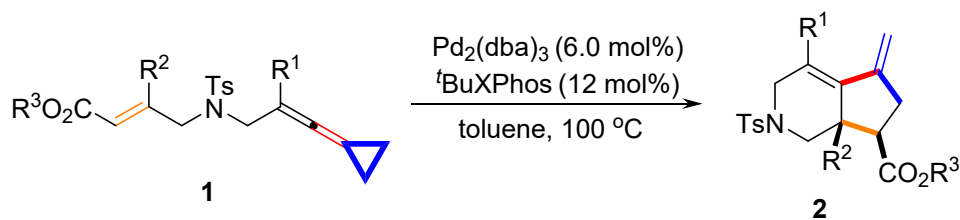

To a 5.0 mL dried tube was charged with **1** (0.1 mmol), Pd<sub>2</sub>dba<sub>3</sub> (0.006 mmol) and <sup>t</sup>BuXPhos (0.012 mmol). The reaction tube was evacuated and backfilled with argon (repeated three times). Then, toluene (2.0 mL) was added into the reaction tube. The reaction mixture was stirred at 100 °C for 8.0 h. The solvent was removed under reduced pressure and the residue was purified by a flash column chromatography (SiO<sub>2</sub>) to give the corresponding product **2**.

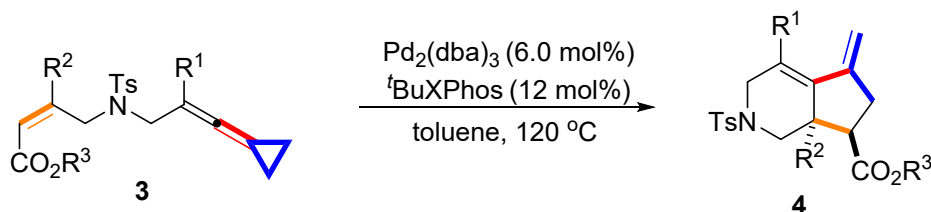

To a 5.0 mL dried tube was charged with **3** (0.1 mmol), Pd<sub>2</sub>dba<sub>3</sub> (0.006 mmol) and <sup>t</sup>BuXPhos (0.012 mmol). The reaction tube was evacuated and backfilled with argon (repeated three times). Then, toluene (2.0 mL) was added into the reaction tube. The reaction mixture was stirred at 120 °C for 8.0 h. The solvent was removed under reduced pressure and the residue was purified by a flash column chromatography (SiO<sub>2</sub>) to give the corresponding product **4**.

## 5. Gram scale reaction and synthetic transformations.

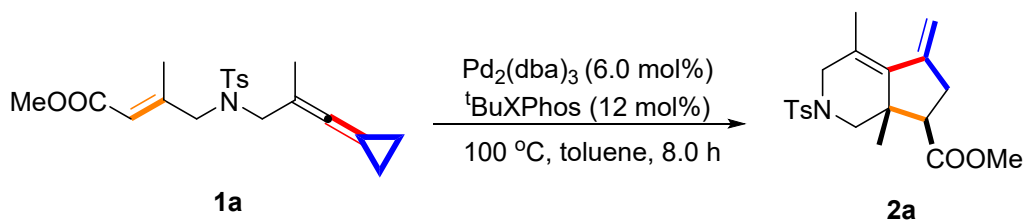

To a 100 mL dried tube was charged with **1a** (1.1 g, 3.0 mmol), Pd<sub>2</sub>dba<sub>3</sub> (175.7 mg, 0.18 mmol) and <sup>t</sup>BuXPhos (182.2 mg, 0.36 mmol). The reaction tube was evacuated and backfilled with argon (repeated three times). Then, toluene (40.0 mL) was added into the reaction tube. The reaction mixture was stirred at 100 °C for 8.0 h. The solvent was removed under reduced pressure and the residue was purified by a flash column chromatography (SiO<sub>2</sub>) to give the corresponding product **2a** (1.0 g, 92%).

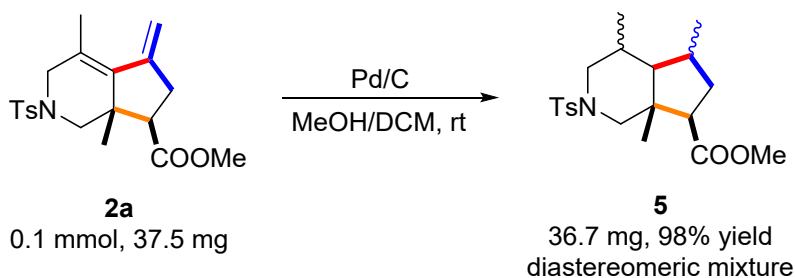

To a solution of **2a** (32.0 mg, 0.1 mmol) in MeOH (5.0 mL) was added Pd/C (7.6 mg, 20% w/w). The reaction system was charged with H<sub>2</sub> balloon and the reaction mixture was stirred at room temperature for 12 h. The reaction mixture was filtered and the volatiles were removed on a rotary evaporator. The residues were passed through a short silica chromatography (PE/EA = 1/1) to afford the desired product **5** (36.7 mg, 98% yield).

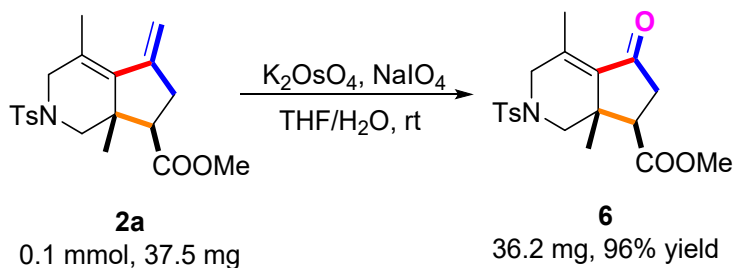



The cycloadduct **2a** (37.5 mg, 0.1 mmol, 1.0 equiv),  $K_2OsO_4 \cdot 2H_2O$  (2.2 mg, 0.006 mmol, 0.06 equiv) and  $NaIO_4$  (106.9 mg, 0.5 mmol, 5.0 equiv) were suspended in THF (1.0 mL) and  $H_2O$  (1.0 mL). The reaction mixture was stirred for 3.0 h. After being quenched by adding aqueous  $Na_2S_2O_3$  solution and extracted by EA, the combined organic phase was washed with brine, dried over anhydrous  $Na_2SO_4$ , filtered, and concentrated under vacuum. The residue was purified by a flash column chromatography (PE/EA = 4:1) to give the desired product **6** (36.2 mg, 96% yield).

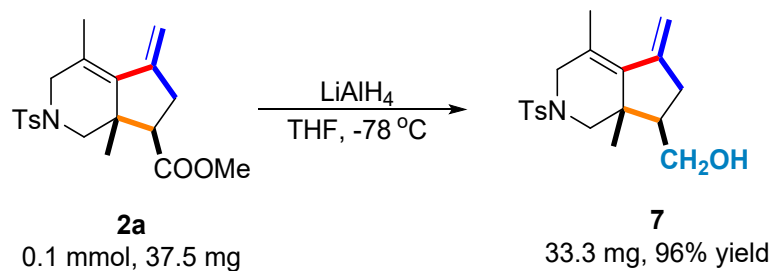

A solution of **2a** (37.5 mg, 0.1 mmol) in anhydrous THF (2.0 mL) was cooled to  $-78\text{ }^\circ\text{C}$  under nitrogen atmosphere and 1.0 mL (1.0 mmol) of 1.0 M sodium  $LiAlH_4$  in THF was added dropwise. The reaction mixture was stirred for 40 min at this temperature. After being stirred for 30 min, the reaction was quenched with saturated  $NH_4Cl$  aqueous solution, extracted with ethyl acetate, dried over anhydrous  $MgSO_4$ , filtered, and evaporated. The residue was chromatographed through a silica gel column (PE/EA = 2/1) to afford product **7** (33.3 mg, 96% yield).

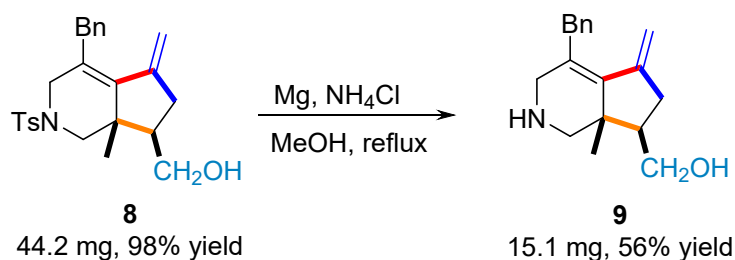

A solution of **9** (44.2 mg, 0.1 mmol),  $Mg$  (10.0 eq.) and  $NH_4Cl$  (10.0 eq.) in anhydrous  $MeOH$  (2.0 mL) was reflux to  $80\text{ }^\circ\text{C}$  under nitrogen atmosphere. After being stirred for 8 hours, the reaction was quenched with a saturated  $NH_4Cl$  aqueous solution, extracted with ethyl acetate, dried over anhydrous  $MgSO_4$ , filtered, and evaporated under reduced pressure. The residue was chromatographed through

a silica gel column (DCM/MeOH = 2/1) to afford product **9** (15.1 mg, 56% yield).

## 6. Spectroscopic data.

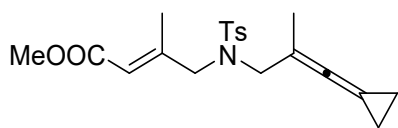

### methyl (E)-4-((N-(3-cyclopropylidene-2-methyl-allyl)-4-methylphenyl)sulfonamido)-3-methylbut-2-enoate (**1a**)

A colorless oil, 90% yield, 338.4 mg.  $^1\text{H}$  NMR (400 MHz,  $\text{CDCl}_3$ )  $\delta$  7.70 (d,  $J = 8.0$  Hz, 2H), 7.30 (d,  $J = 8.0$  Hz, 2H), 5.78 (q,  $J = 1.2$  Hz, 1H), 3.81 (s, 2H), 3.77 (s, 2H), 3.68 (s, 3H), 2.43 (s, 3H), 2.07 (d,  $J = 1.2$  Hz, 3H), 1.62 (s, 3H), 1.45 – 1.32 (m, 4H).  $^{13}\text{C}$  NMR (100 MHz,  $\text{CDCl}_3$ )  $\delta$  189.1, 166.6, 153.5, 143.4, 137.1, 129.7, 127.3, 117.5, 96.8, 77.7, 54.5, 52.5, 51.0, 21.5, 17.2, 16.5, 7.0, 6.9. IR (neat)  $\nu$  660, 769, 1089, 1216, 1346, 1661, 1719, 2025, 2923  $\text{cm}^{-1}$ . HRMS (ESI) calcd. for  $\text{C}_{20}\text{H}_{25}\text{NO}_4\text{SNa}$  ( $\text{M}+\text{Na}$ ) $^+$ : 398.1396, Found: 398.1398.

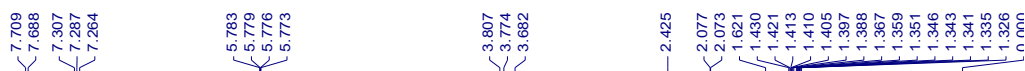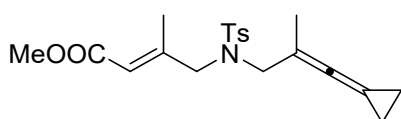

$^1\text{H}$  NMR ( $\text{CDCl}_3$ , 400 MHz, TMS)

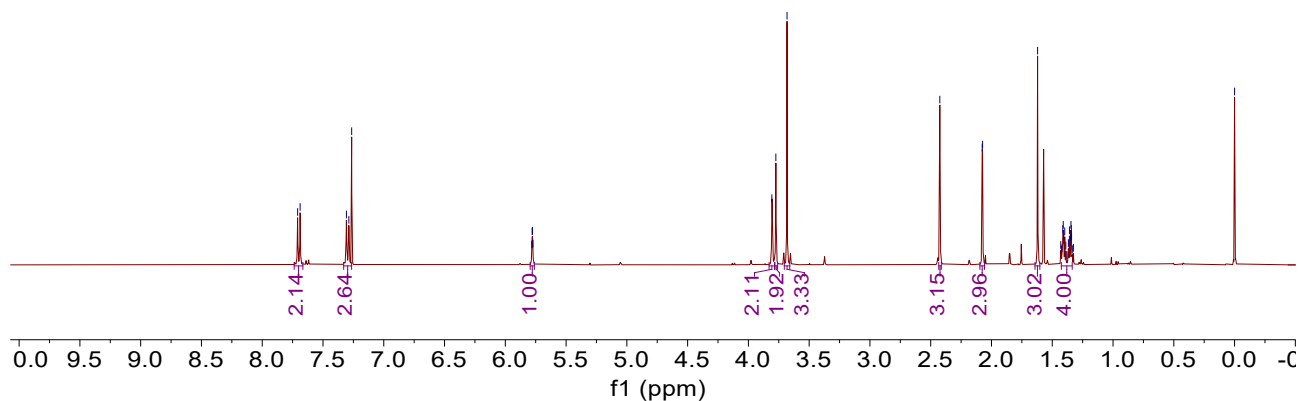

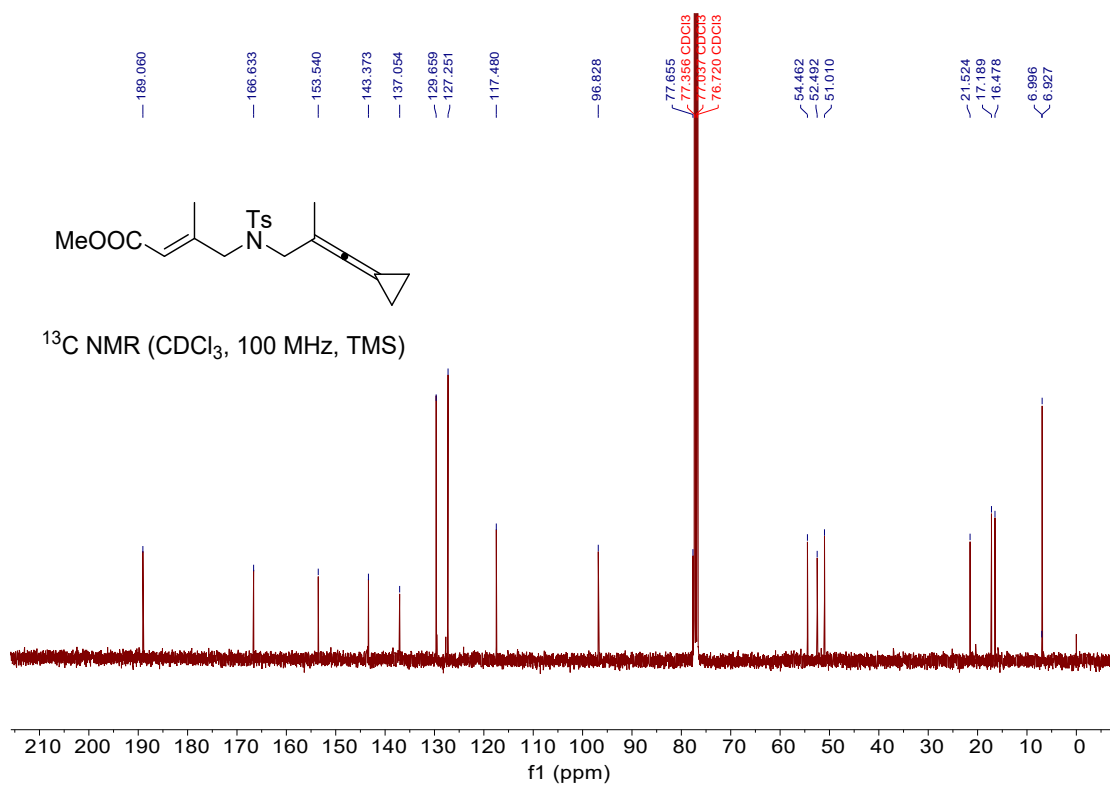

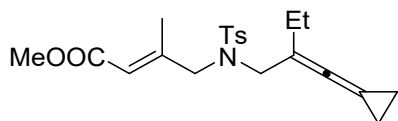

**methyl (E)-4-((N-(2-(cyclopropylidene- $\lambda^5$ -methylene)butyl)-4-methylphenyl)sulfonamido)-3-methylbut-2-enoate (1b)**

A colorless oil, 90% yield, 351.0 mg.  $^1\text{H}$  NMR (400 MHz,  $\text{CDCl}_3$ )  $\delta$  7.69 (d,  $J = 8.0$  Hz, 2H), 7.30 (d,  $J = 8.0$  Hz, 2H), 5.78 (q,  $J = 1.2$  Hz, 1H), 3.85 – 3.75 (m, 4H), 3.68 (s, 3H), 2.42 (s, 3H), 2.07 (d,  $J = 1.2$  Hz, 3H), 1.92 (q,  $J = 7.2$  Hz, 2H), 1.45 – 1.39 (m, 2H), 1.39 – 1.32 (m, 2H), 0.92 (t,  $J = 7.2$  Hz, 3H).  $^{13}\text{C}$  NMR (100 MHz,  $\text{CDCl}_3$ )  $\delta$  188.4, 166.7, 153.7, 143.4, 136.9, 129.6, 127.3, 117.3, 103.6, 79.4, 54.6, 51.6, 51.0, 23.5, 21.5, 16.5, 12.0, 7.1. IR (neat)  $\nu$  660, 772, 1158, 1446, 1663, 1720, 2020, 2964  $\text{cm}^{-1}$ . HRMS (ESI) calcd. for  $\text{C}_{21}\text{H}_{27}\text{NO}_4\text{SNa}$  ( $\text{M}+\text{Na}$ ) $^+$ : 412.1553, Found: 412.1554.

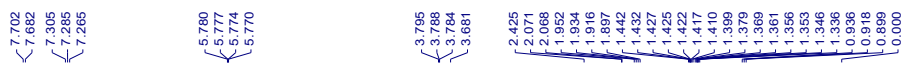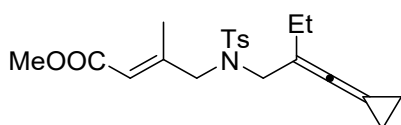

$^1\text{H}$  NMR ( $\text{CDCl}_3$ , 400 MHz, TMS)

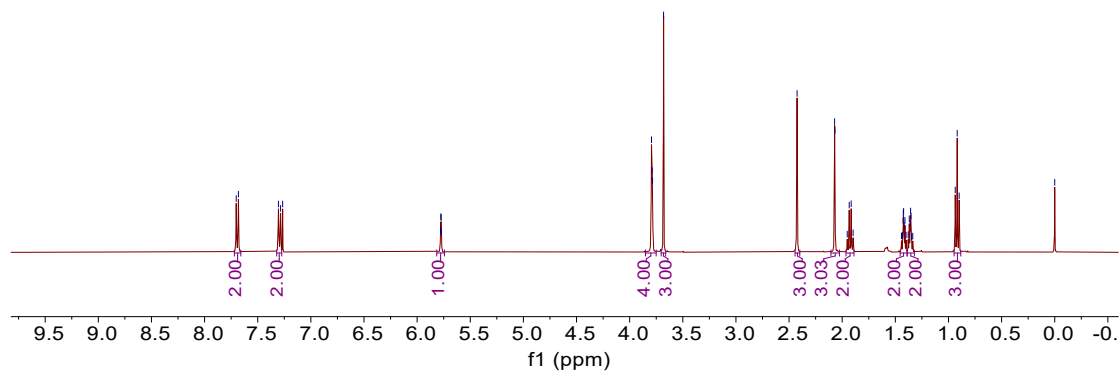

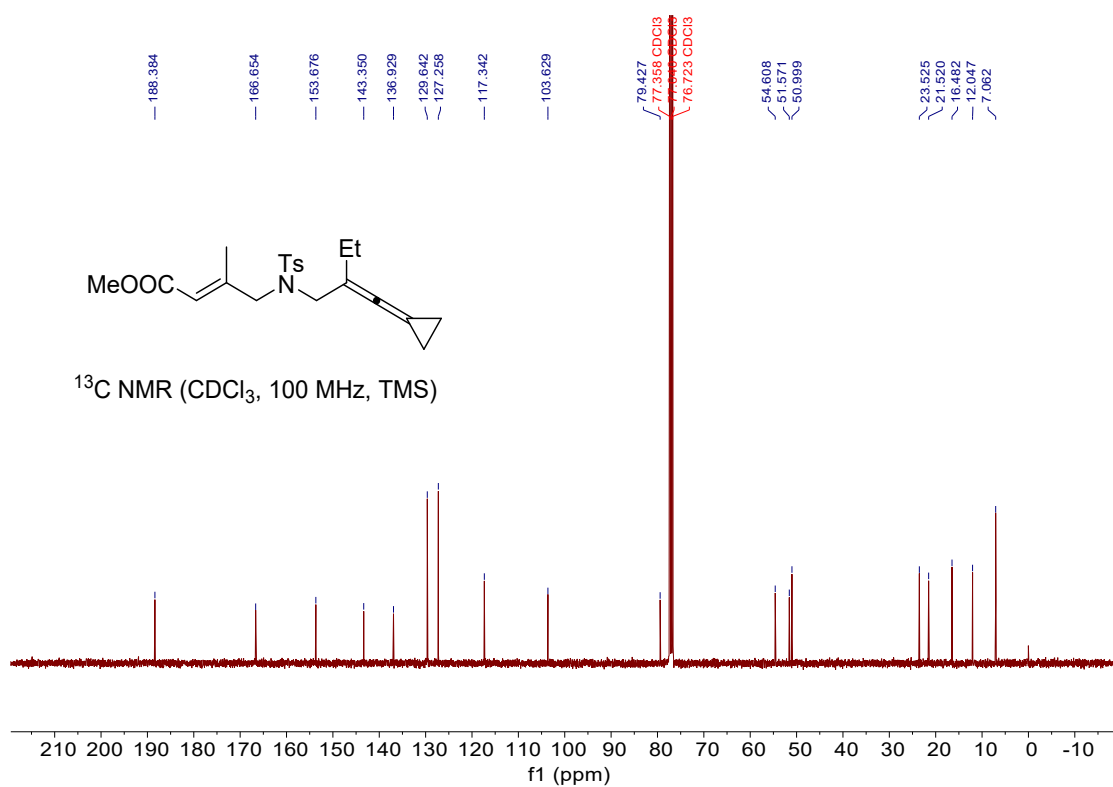

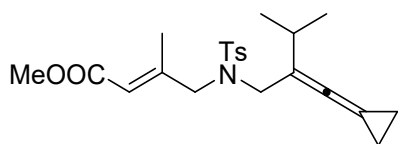

**methyl (E)-4-((N-(2-(cyclopropylidene- $\lambda^5$ -methylene)-3-methylbutyl)-4-methylphenyl)sulfonamido)-3-methylbut-2-enoate (1c)**

A colorless oil, 80% yield, 323.2 mg.  $^1\text{H}$  NMR (400 MHz,  $\text{CDCl}_3$ )  $\delta$  7.69 (d,  $J = 8.0$  Hz, 2H), 7.29 (d,  $J = 8.0$  Hz, 2H), 5.79 (q,  $J = 1.2$  Hz, 1H), 3.83 (s, 2H), 3.77 (d,  $J = 1.2$  Hz, 2H), 3.68 (s, 3H), 2.42 (s, 3H), 2.13 (q,  $J = 6.8$  Hz, 1H), 2.08 (d,  $J = 1.2$  Hz, 3H), 1.46 – 1.30 (m, 4H), 0.96 (d,  $J = 6.8$  Hz, 6H).  $^{13}\text{C}$  NMR (100 MHz,  $\text{CDCl}_3$ )  $\delta$  187.6, 166.7, 153.8, 143.3, 136.9, 129.6, 127.3, 117.3, 108.4, 80.0, 54.7, 51.0, 50.3, 28.6, 21.5, 21.5, 16.5, 7.1. IR (neat)  $\nu$  667, 819, 1221, 1446, 1660, 1721, 2027, 2959  $\text{cm}^{-1}$ . HRMS (ESI) calcd. for  $\text{C}_{22}\text{H}_{29}\text{NO}_4\text{SNa}$  ( $\text{M}+\text{Na}$ ) $^+$ : 426.1710, Found: 426.1714.

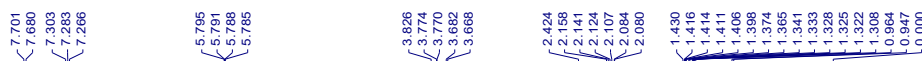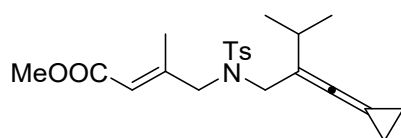

$^1\text{H}$  NMR ( $\text{CDCl}_3$ , 400 MHz, TMS)

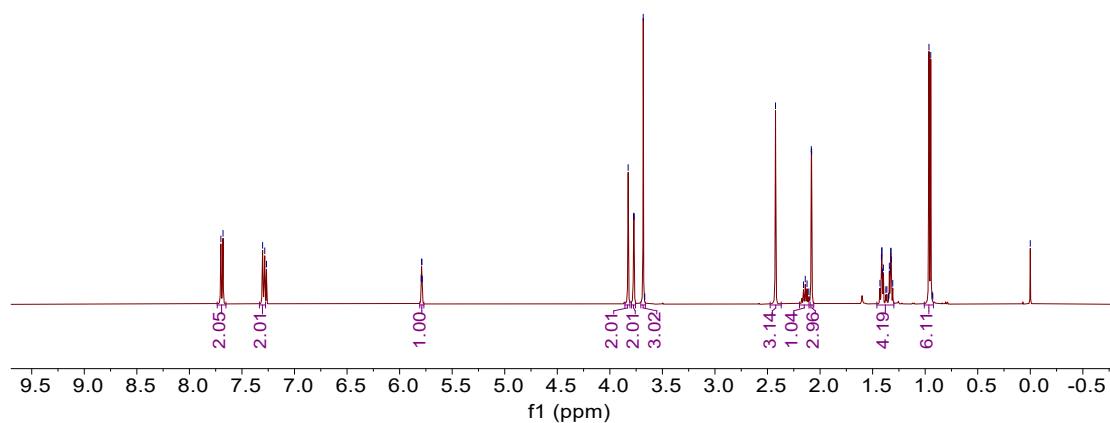

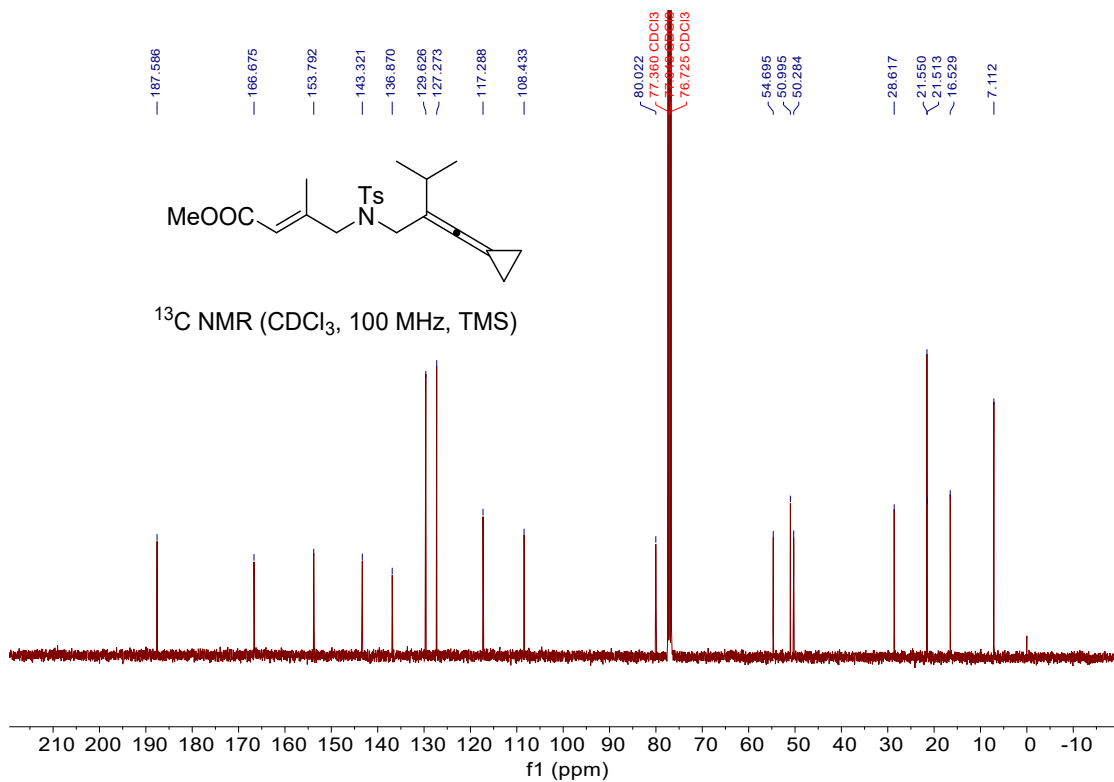

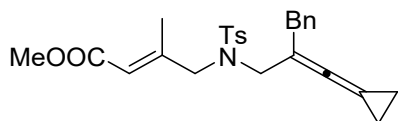

**methyl (E)-4-((N-(2-benzyl-3-cyclopropylidene- $\lambda^5$ -allyl)-4-methylphenyl)sulfonamido)-3-methylbut-2-enoate (1d)**

A colorless oil, 90% yield, 408.6 mg.  $^1\text{H}$  NMR (400 MHz,  $\text{CDCl}_3$ )  $\delta$  7.68 – 7.63 (m, 2H), 7.29 (s, 1H), 7.27 – 7.22 (m, 3H), 7.21 – 7.13 (m, 3H), 5.77 (q,  $J = 1.2$  Hz, 1H), 3.80 (s, 2H), 3.75 (s, 2H), 3.68 (s, 3H), 3.27 (s, 2H), 2.42 (s, 3H), 2.08 (d,  $J = 1.2$  Hz, 3H), 1.32-1.36 (m, 4H).  $^{13}\text{C}$  NMR (100 MHz,  $\text{CDCl}_3$ )  $\delta$  189.8, 166.6, 153.7, 143.4, 139.1, 136.8, 129.7, 129.0, 128.2, 127.3, 126.2, 117.4, 101.3, 79.2, 54.9, 51.0, 50.9, 37.4, 21.5, 16.6, 7.2. IR (neat)  $\nu$  661, 909, 1216, 1347, 1660, 1722, 2025, 2951  $\text{cm}^{-1}$ . HRMS (ESI) calcd. for  $\text{C}_{26}\text{H}_{29}\text{NO}_4\text{SNa}$  ( $\text{M}+\text{Na}$ ) $^+$ : 474.1710, Found: 474.1707.

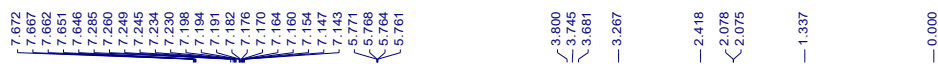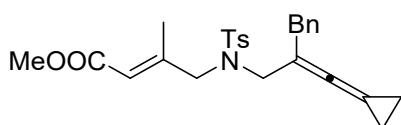

$^1\text{H}$  NMR ( $\text{CDCl}_3$ , 400 MHz, TMS)

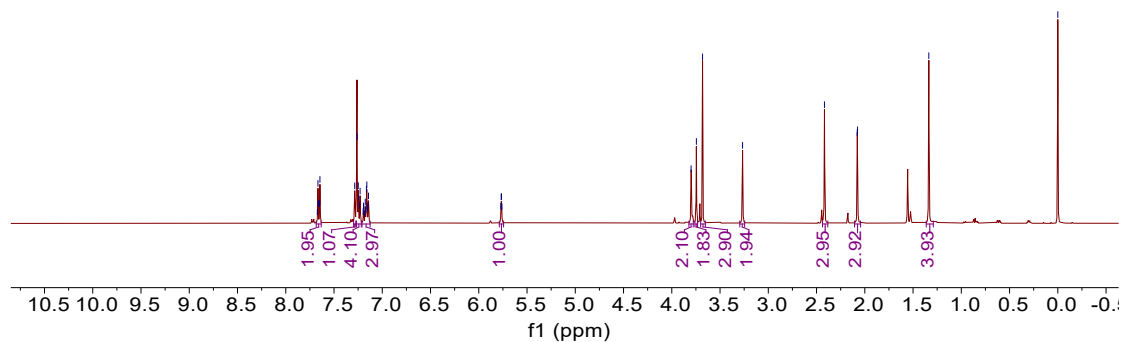



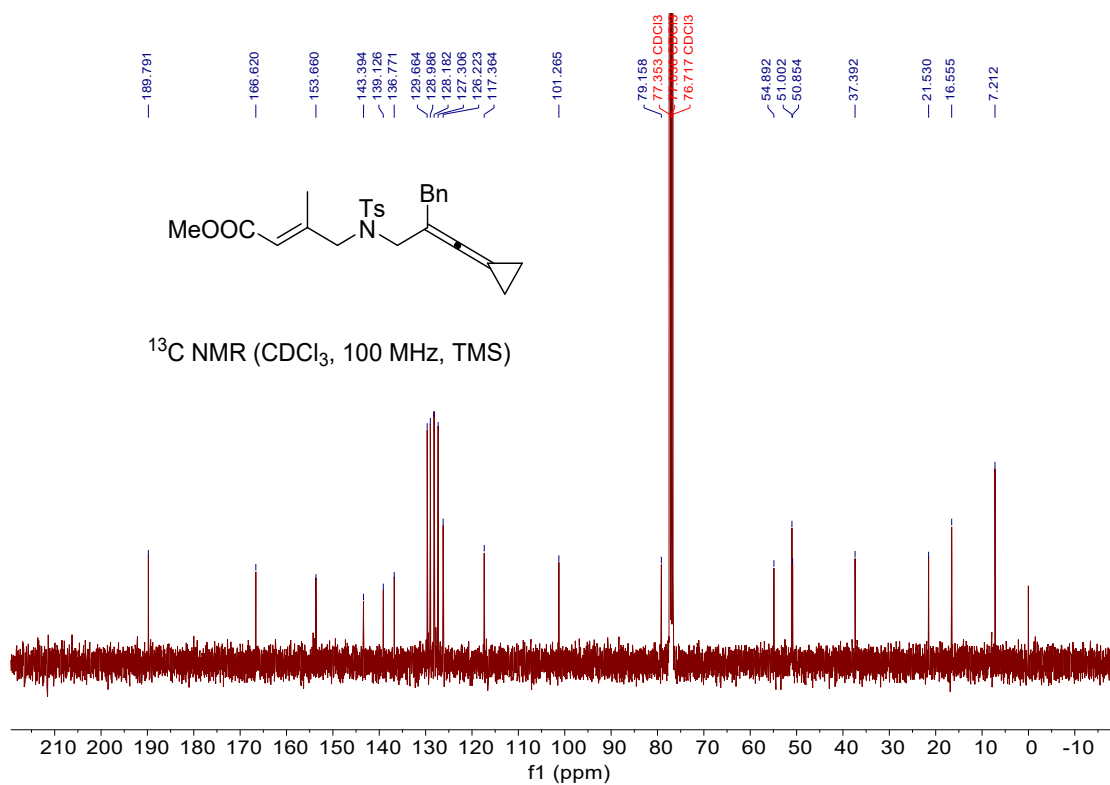

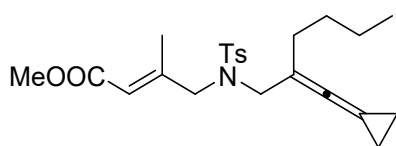

**methyl (E)-4-((N-(2-(cyclopropylidene- $\lambda^5$ -methylene)hexyl)-4-methylphenyl)sulfonamido)-3-methylbut-2-enoate (1e)**

A colorless oil, 90% yield, 375.3 mg.  $^1\text{H}$  NMR (400 MHz,  $\text{CDCl}_3$ )  $\delta$  7.69 (d,  $J = 8.0$  Hz, 2H), 7.29 (d,  $J = 8.0$  Hz, 2H), 5.79 (q,  $J = 1.2$  Hz, 1H), 3.83 – 3.75 (m, 4H), 3.68 (s, 3H), 2.42 (s, 3H), 2.08 (d,  $J = 1.2$  Hz, 3H), 1.87 – 1.78 (m, 2H), 1.45 – 1.32 (m, 4H), 1.31 – 1.19 (m, 4H), 0.84 (t,  $J = 7.2$  Hz, 3H).  $^{13}\text{C}$  NMR (100 MHz,  $\text{CDCl}_3$ )  $\delta$  188.7, 166.7, 153.7, 143.3, 137.0, 129.6, 127.3, 117.4, 101.9, 78.9, 54.4, 51.5, 51.0, 30.0, 29.7, 22.3, 21.5, 16.5, 13.9, 7.0. IR (neat)  $\nu$  660, 1220, 1358, 1661, 1720, 2020, 2957  $\text{cm}^{-1}$ . HRMS (ESI) calcd. for  $\text{C}_{23}\text{H}_{31}\text{NO}_4\text{SNa}$  ( $\text{M}+\text{Na}$ ) $^+$ : 440.1866, Found: 440.1866.

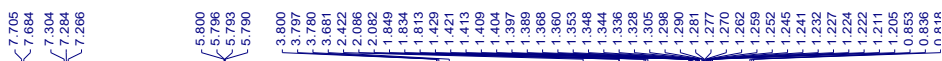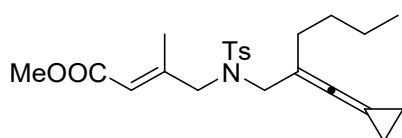

$^1\text{H}$  NMR ( $\text{CDCl}_3$ , 400 MHz, TMS)

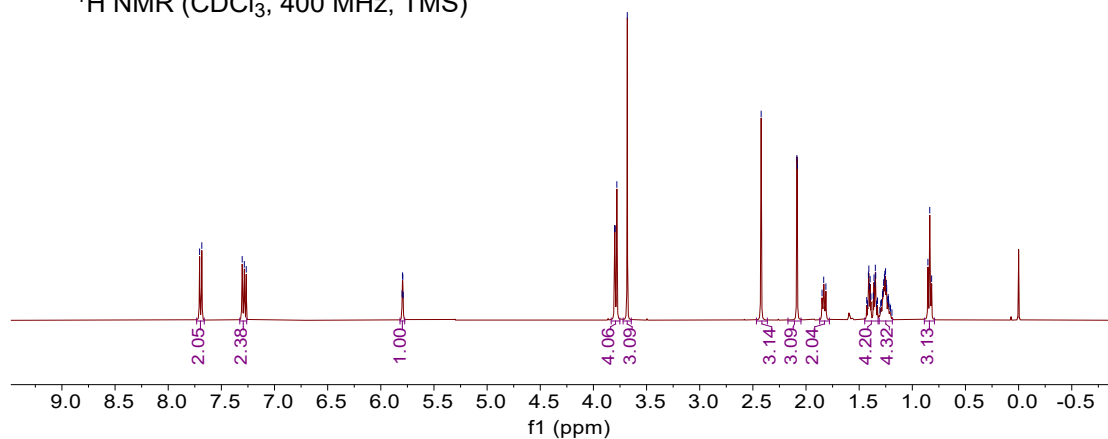

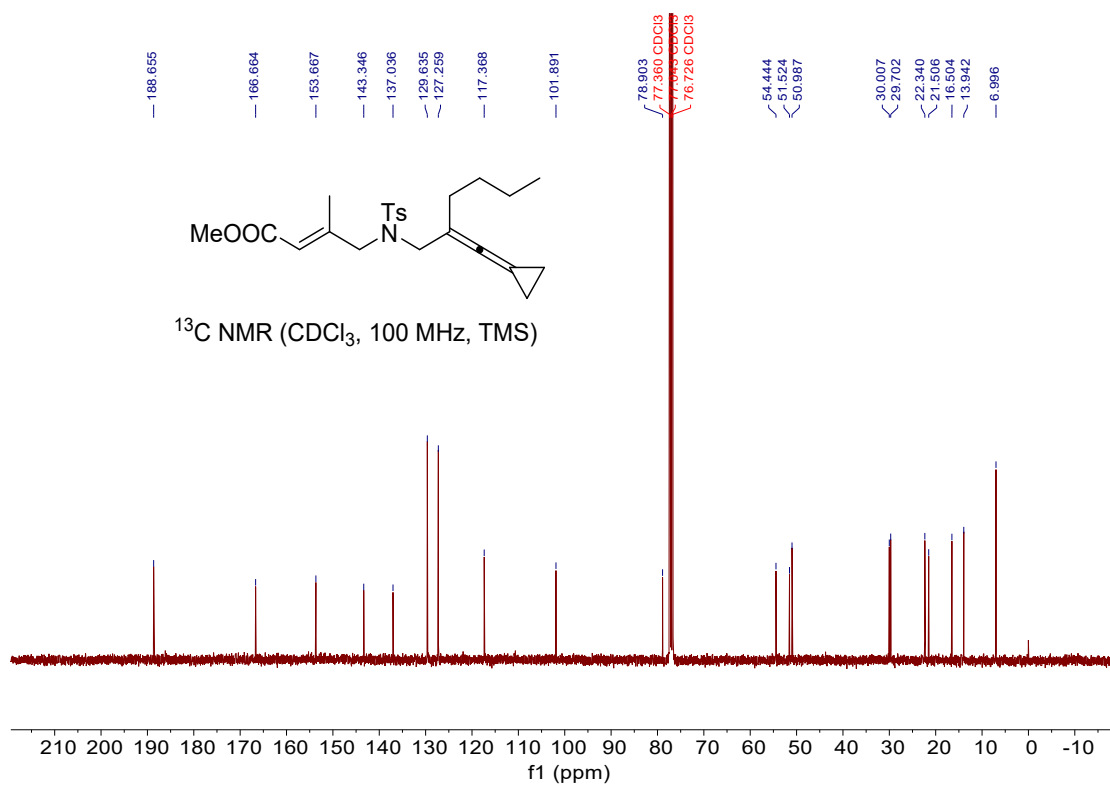

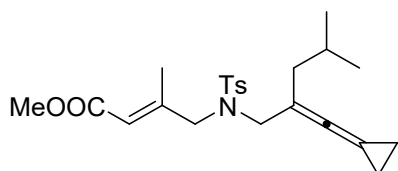

**methyl (E)-4-((N-(2-(cyclopropylidene- $\lambda^5$ -methylene)-4-methylpentyl)-4-methylphenyl)sulfonamido)-3-methylbut-2-enoate (1f)**

A colorless oil, 90% yield, 375.3 mg.  $^1\text{H}$  NMR (400 MHz,  $\text{CDCl}_3$ )  $\delta$  7.69 (d,  $J = 8.0$  Hz, 2H), 7.29 (d,  $J = 8.0$  Hz, 2H), 5.79 (q,  $J = 1.2$  Hz, 1H), 3.82 (s, 2H), 3.76 (s, 2H), 3.68 (s, 3H), 2.42 (s, 3H), 2.08 (d,  $J = 1.2$  Hz, 3H), 1.70 (d,  $J = 6.8$  Hz, 2H), 1.66 – 1.58 (m, 1H), 1.44 – 1.30 (m, 4H), 0.82 (d,  $J = 6.8$  Hz, 6H).  $^{13}\text{C}$  NMR (100 MHz,  $\text{CDCl}_3$ )  $\delta$  189.2, 166.7, 153.6, 143.3, 137.1, 129.6, 127.3, 117.4, 100.5, 78.5, 54.4, 51.5, 51.0, 39.6, 26.6, 22.4, 21.5, 16.5, 6.9. IR (neat)  $\nu$  662, 910, 1659, 1721, 2024, 2952  $\text{cm}^{-1}$ . HRMS (ESI) calcd. for  $\text{C}_{24}\text{H}_{32}\text{NO}_4\text{S}$  ( $\text{M}+\text{H}$ ) $^+$ : 418.2047, Found: 418.2043.

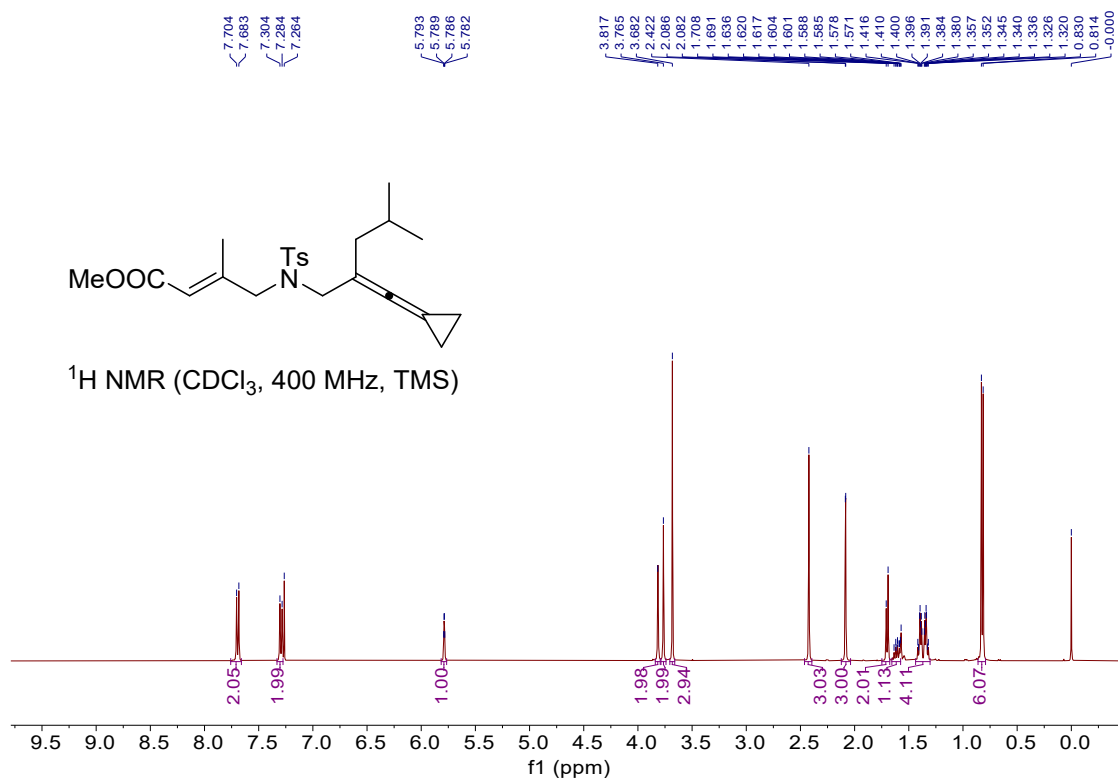

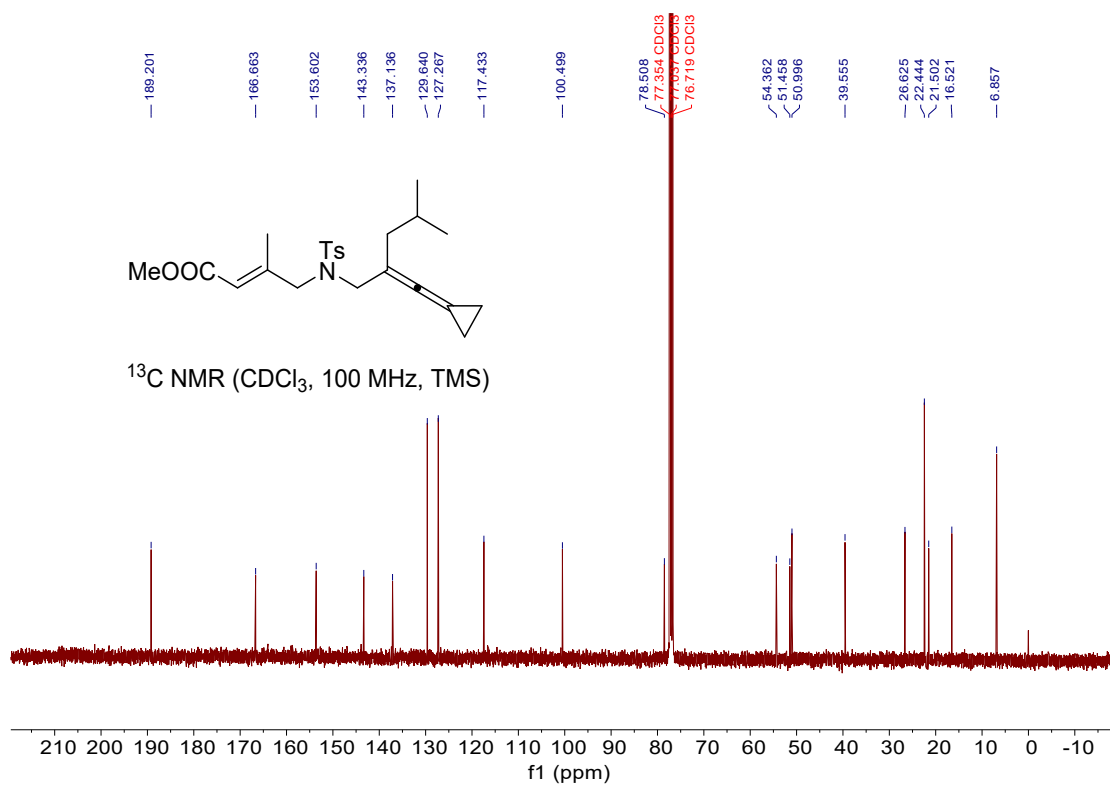

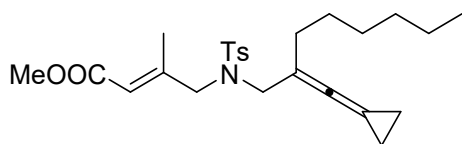

**methyl (E)-4-((N-(2-(cyclopropylidene- $\lambda^5$ -methylene)octyl)-4-methylphenyl)sulfonamido)-3-methylbut-2-enoate (1g)**

A colorless oil, 90% yield, 401.4 mg.  $^1\text{H}$  NMR (400 MHz,  $\text{CDCl}_3$ )  $\delta$  7.69 (d,  $J = 8.0$  Hz, 2H), 7.29 (d,  $J = 8.0$  Hz, 2H), 5.79 (q,  $J = 1.2$  Hz, 1H), 3.80 (s, 3H), 3.78 (s, 2H), 3.68 (s, 3H), 2.42 (s, 3H), 2.08 (d,  $J = 1.2$  Hz, 3H), 1.82 (t,  $J = 7.2$  Hz, 2H), 1.44 – 1.32 (m, 4H), 1.31 – 1.12 (m, 8H), 0.87 (t,  $J = 7.2$  Hz, 3H), 0.12 – 0.04 (m, 4H).  $^{13}\text{C}$  NMR (100 MHz,  $\text{CDCl}_3$ )  $\delta$  187.6, 165.6, 152.6, 142.3, 136.0, 128.6, 126.2, 116.3, 100.9, 77.9, 53.4, 50.5, 50.0, 30.7, 29.3, 27.9, 26.5, 21.6, 20.5, 15.5, 13.1, 6.0. IR (neat)  $\nu$  660, 991, 1659, 1721, 2021, 2925  $\text{cm}^{-1}$ . HRMS (ESI) calcd. for  $\text{C}_{25}\text{H}_{35}\text{NO}_4\text{SNa}$  ( $\text{M}+\text{Na}$ ) $^+$ : 468.2179, Found: 468.2175.

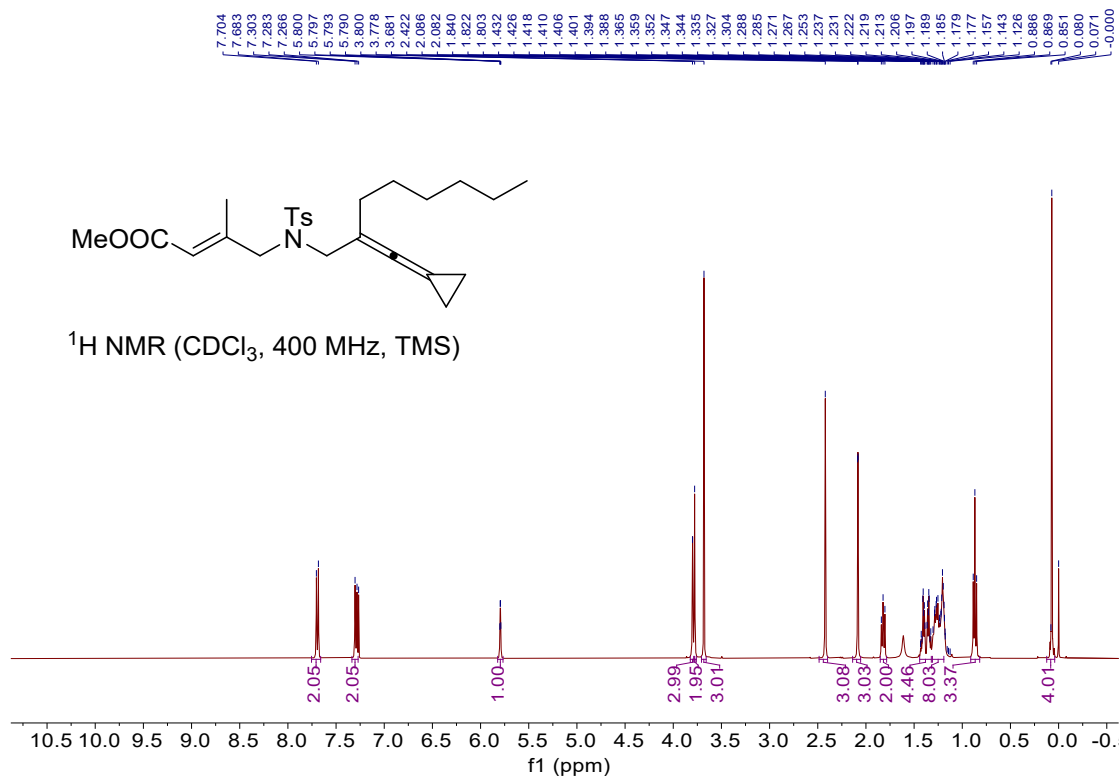

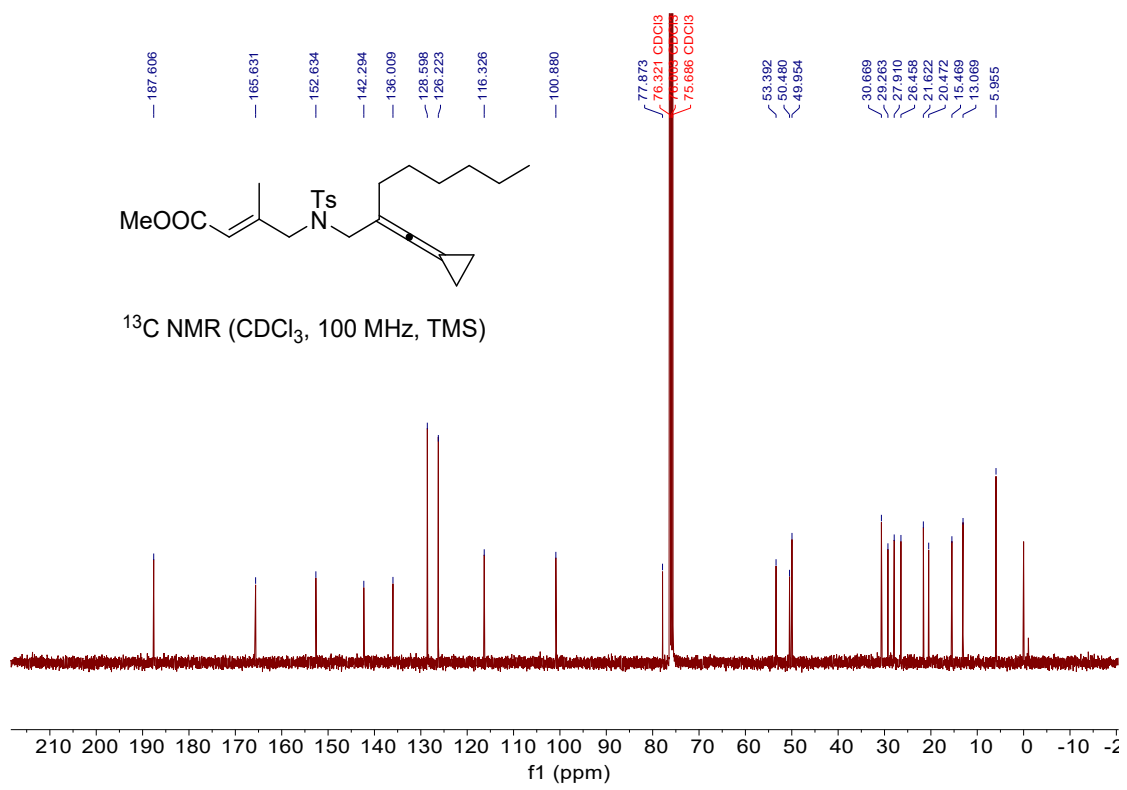

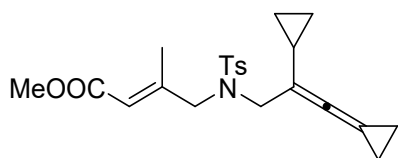

**methyl (E)-4-((N-(2-cyclopropyl-3-cyclopropylidene- $\lambda^5$ -allyl)-4-methylphenyl)sulfonamido)-3-methylbut-2-enoate (1h)**

A colorless oil, 80% yield, 321.6mg.  $^1\text{H}$  NMR (400 MHz,  $\text{CDCl}_3$ )  $\delta$  7.71 (d,  $J = 8.0$  Hz, 2H), 7.29 (d,  $J = 8.0$  Hz, 2H), 5.80 (q,  $J = 1.2$  Hz, 1H), 3.90 (s, 2H), 3.84 (d,  $J = 1.2$  Hz, 2H), 3.68 (s, 3H), 2.42 (s, 3H), 2.09 (d,  $J = 1.2$  Hz, 3H), 1.45 – 1.31 (m, 4H), 1.07 – 0.98 (m, 1H), 0.63 – 0.56 (m, 2H), 0.32 – 0.23 (m, 2H).  $^{13}\text{C}$  NMR (100 MHz,  $\text{CDCl}_3$ )  $\delta$  186.6, 166.7, 153.6, 143.3, 137.2, 129.6, 127.3, 117.5, 105.3, 80.6, 54.4, 51.5, 51.0, 21.5, 16.5, 11.0, 7.5, 7.3. IR (neat)  $\nu$  661, 911, 1346, 1660, 1719, 2020, 2926  $\text{cm}^{-1}$ . HRMS (ESI) calcd. for  $\text{C}_{22}\text{H}_{27}\text{NO}_4\text{SNa}$  ( $\text{M}+\text{Na}$ ) $^+$ : 424.1553, Found: 424.1558.

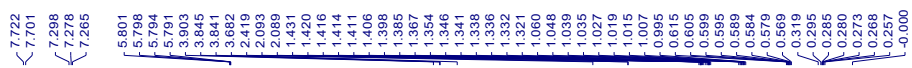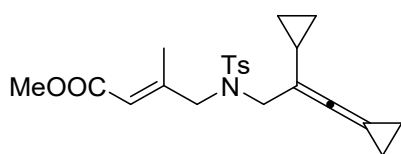

$^1\text{H}$  NMR ( $\text{CDCl}_3$ , 400 MHz, TMS)

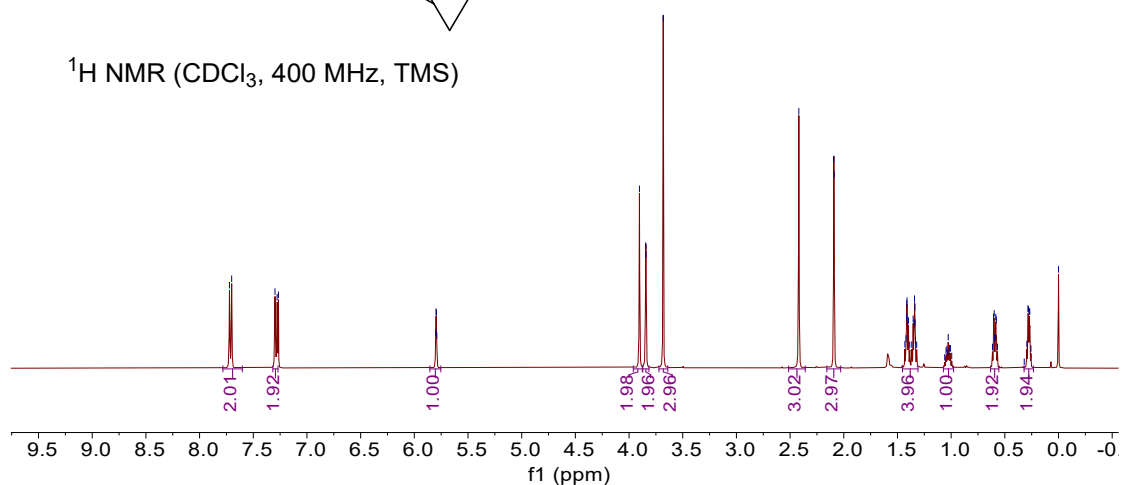



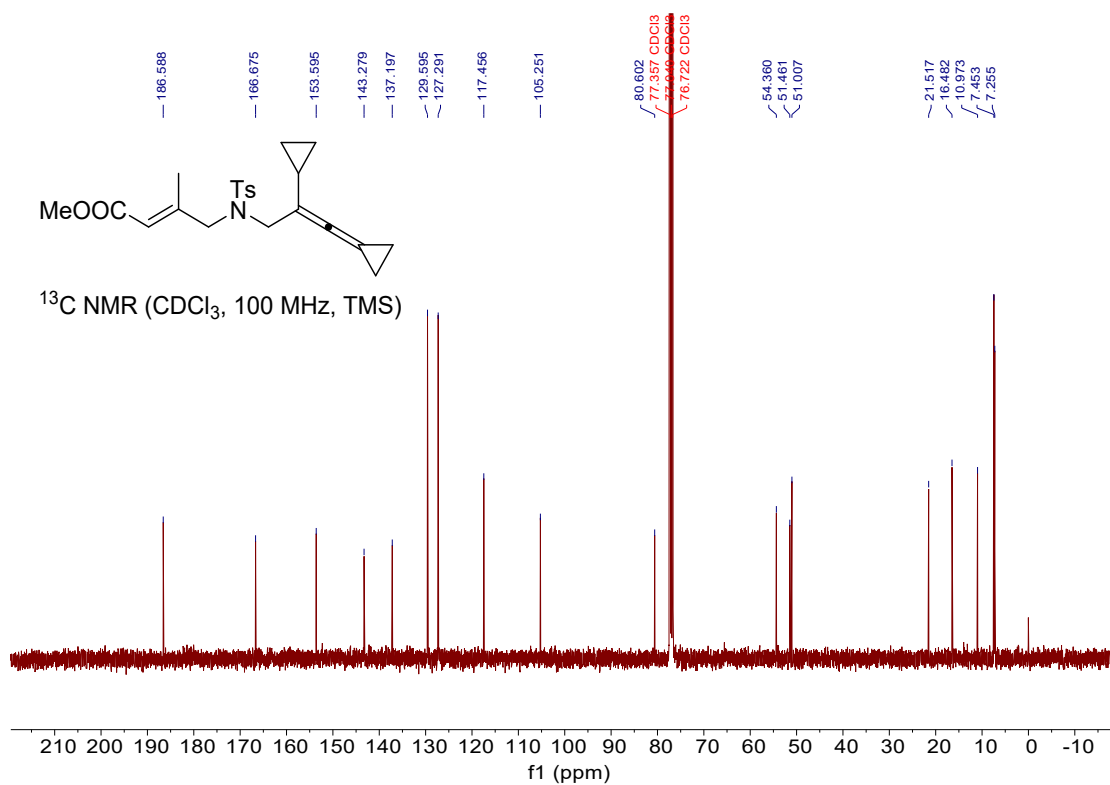

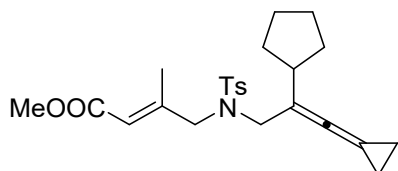

**methyl (E)-4-((N-(2-cyclopentyl-3-cyclopropylidene- $\lambda^5$ -allyl)-4-methylphenyl)sulfonamido)-3-methylbut-2-enoate (1i)**

A colorless oil, 85% yield, 369.8 mg.  $^1\text{H}$  NMR (400 MHz,  $\text{CDCl}_3$ )  $\delta$  7.69 (d,  $J = 8.0$  Hz, 2H), 7.29 (d,  $J = 8.0$  Hz, 2H), 5.79 (q,  $J = 1.2$  Hz, 1H), 3.82 (s, 2H), 3.81 (s, 2H), 3.68 (s, 3H), 2.42 (s, 3H), 2.25 (p,  $J = 7.8$  Hz, 1H), 2.08 (d,  $J = 1.2$  Hz, 3H), 1.79 – 1.67 (m, 2H), 1.61 – 1.46 (m, 4H), 1.42 – 1.26 (m, 6H).  $^{13}\text{C}$  NMR (100 MHz,  $\text{CDCl}_3$ )  $\delta$  187.3, 166.7, 153.8, 143.3, 137.0, 129.6, 127.3, 117.3, 106.4, 79.9, 54.6, 51.1, 51.0, 40.1, 31.8, 24.9, 21.5, 16.5, 7.0. IR (neat)  $\nu$  65, 919, 1346, 1659, 1721, 2022, 2943  $\text{cm}^{-1}$ . HRMS (ESI) calcd. for  $\text{C}_{24}\text{H}_{31}\text{NO}_4\text{SNa}$  ( $\text{M}+\text{Na}$ ) $^+$ : 452.1866, Found: 452.1863.

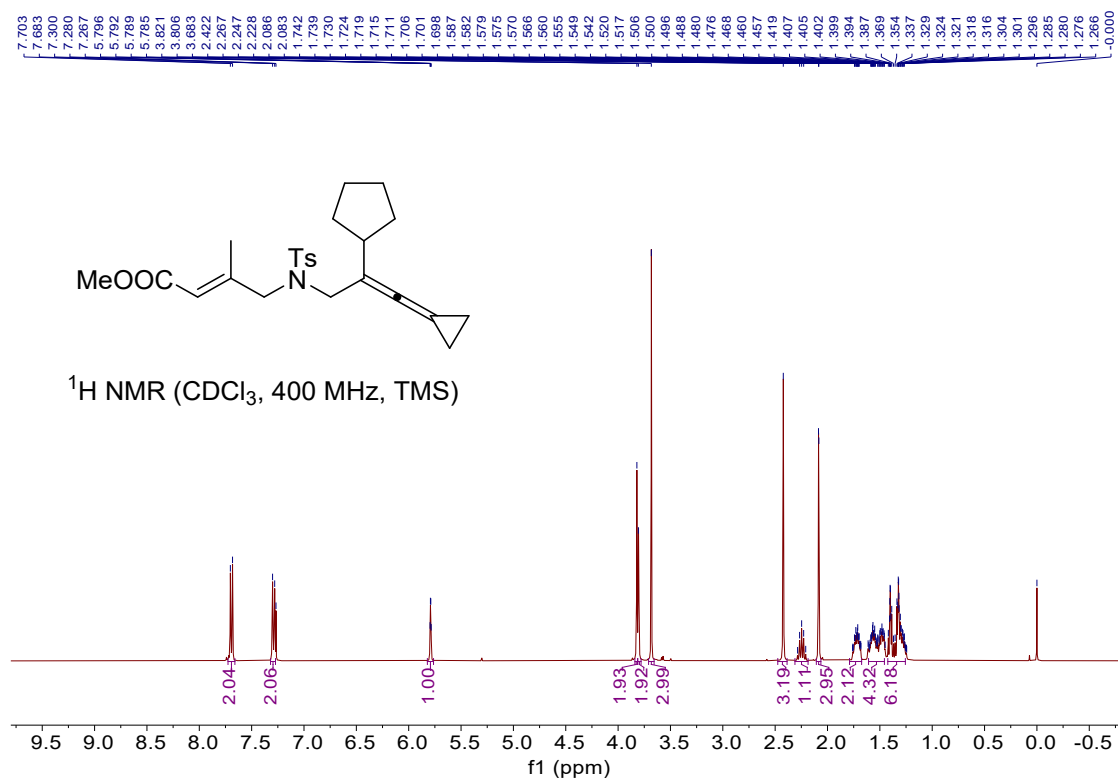

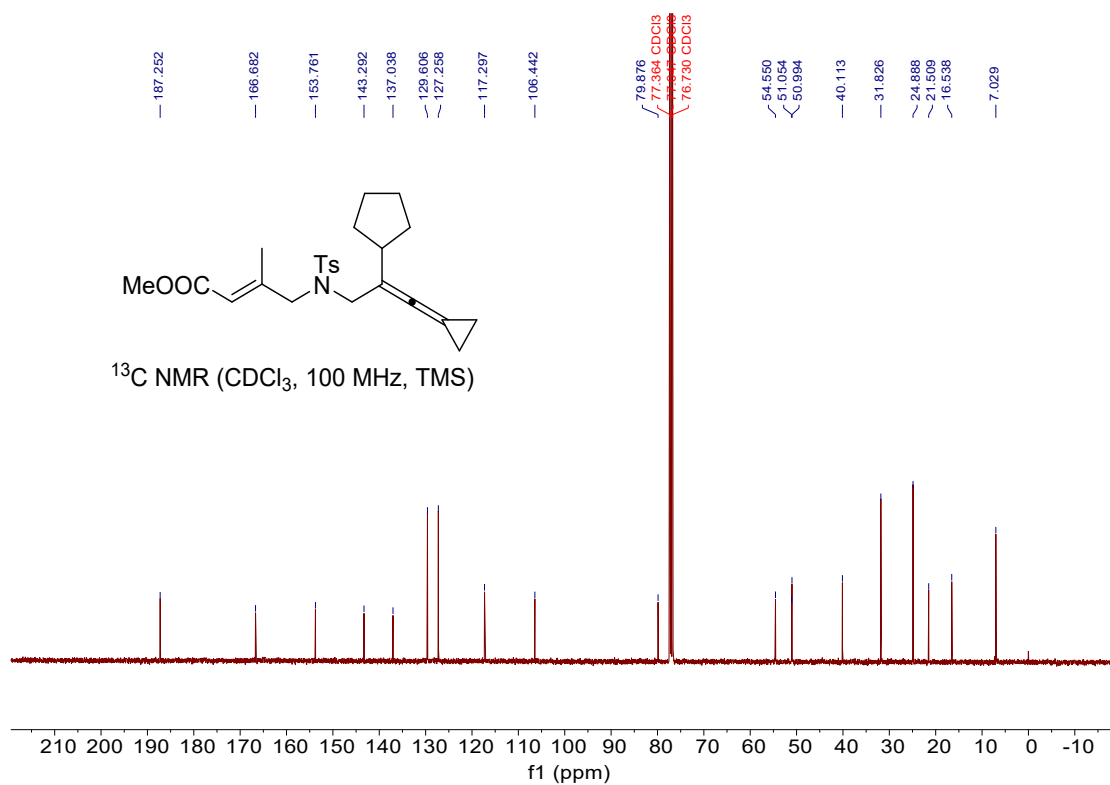

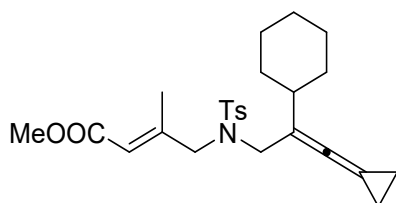

**methyl (E)-4-((N-(2-cyclohexyl-3-cyclopropylidene- $\lambda^5$ -allyl)-4-methylphenyl)sulfonamido)-3-methylbut-2-enoate (1j)**

A colorless oil, 90% yield, 399.6 mg.  $^1\text{H}$  NMR (400 MHz,  $\text{CDCl}_3$ )  $\delta$  7.69 (d,  $J = 8.0$  Hz, 2H), 7.30 (d,  $J = 8.0$  Hz, 2H), 5.82 (q,  $J = 1.2$  Hz, 1H), 3.85 – 3.75 (m, 4H), 3.68 (s, 3H), 2.42 (s, 3H), 2.10 (d,  $J = 1.2$  Hz, 3H), 1.71 – 1.58 (m, 6H), 1.44 – 1.29 (m, 4H), 1.22 – 1.07 (m, 3H), 1.04 – 0.90 (m, 2H).  $^{13}\text{C}$  NMR (100 MHz,  $\text{CDCl}_3$ )  $\delta$  188.3, 166.7, 153.8, 143.3, 137.0, 129.7, 127.3, 117.2, 107.3, 79.5, 54.5, 51.0, 50.0, 38.1, 32.1, 26.3, 26.2, 21.5, 16.5, 7.1. IR (neat)  $\nu$  660, 769, 1220, 1661, 1723, 2016, 2924  $\text{cm}^{-1}$ . HRMS (ESI) calcd. for  $\text{C}_{25}\text{H}_{33}\text{NO}_4\text{SNa}$  ( $\text{M}+\text{Na}$ ) $^+$ : 466.2023, Found: 466.2016.

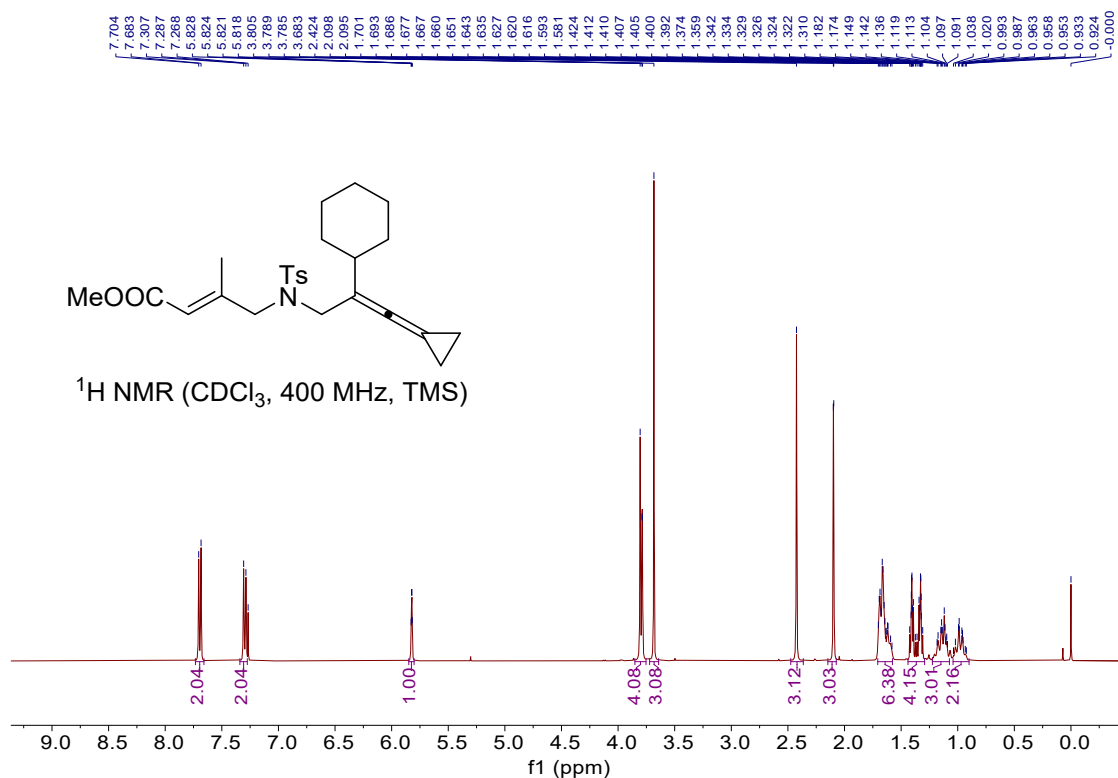

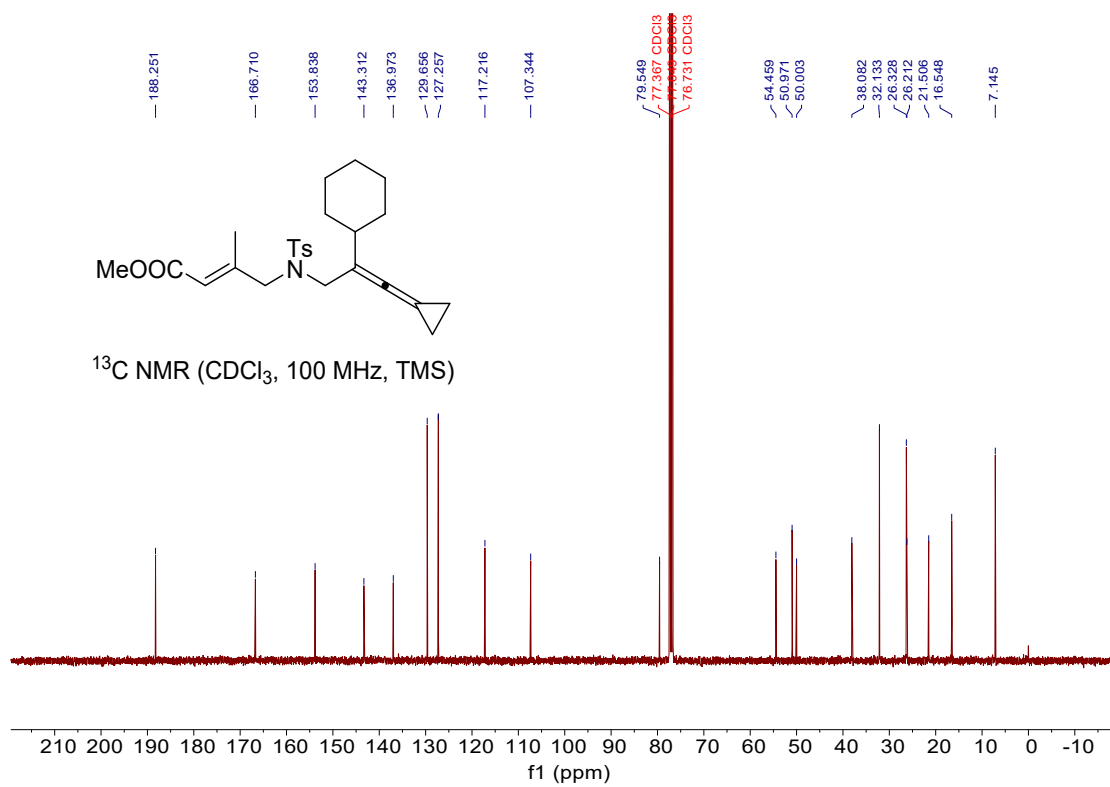

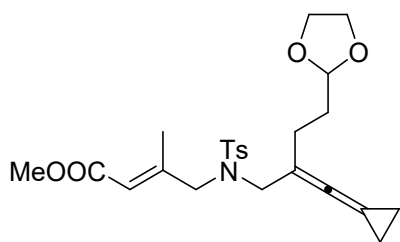

**methyl (E)-4-((N-(2-(cyclopropylidene- $\lambda^5$ -methylene)-4-(1,3-dioxolan-2-yl)butyl)-4-methylphenyl)sulfonamido)-3-methylbut-2-enoate (1k)**

A colorless oil, 80% yield, 368.4 mg.  $^1\text{H}$  NMR (600 MHz,  $\text{CDCl}_3$ )  $\delta$  7.69 (d,  $J = 8.0$  Hz, 2H), 7.29 (d,  $J = 8.0$  Hz, 2H), 5.77 (q,  $J = 1.2$  Hz, 1H), 4.80 (t,  $J = 4.8$  Hz, 1H), 3.96 – 3.92 (m, 2H), 3.84 – 3.79 (m, 6H), 3.68 (s, 3H), 2.42 (s, 3H), 2.08 (d,  $J = 1.2$  Hz, 3H), 2.02 – 1.95 (m, 2H), 1.72 – 1.64 (m, 2H), 1.42 – 1.35 (m, 4H).  $^{13}\text{C}$  NMR (150 MHz,  $\text{CDCl}_3$ )  $\delta$  188.3, 166.6, 153.5, 143.3, 137.0, 129.6, 127.3, 117.4, 103.9, 101.4, 79.9, 64.9, 54.6, 51.5, 51.0, 31.9, 24.7, 21.5, 16.5, 7.1. IR (neat)  $\nu$  661, 1039, 1342, 1661, 1722, 2018, 2982  $\text{cm}^{-1}$ . HRMS (ESI) calcd. for  $\text{C}_{24}\text{H}_{31}\text{NO}_4\text{SNa}$  ( $\text{M}+\text{Na}$ ) $^+$ : 484.1764, Found: 484.1770.

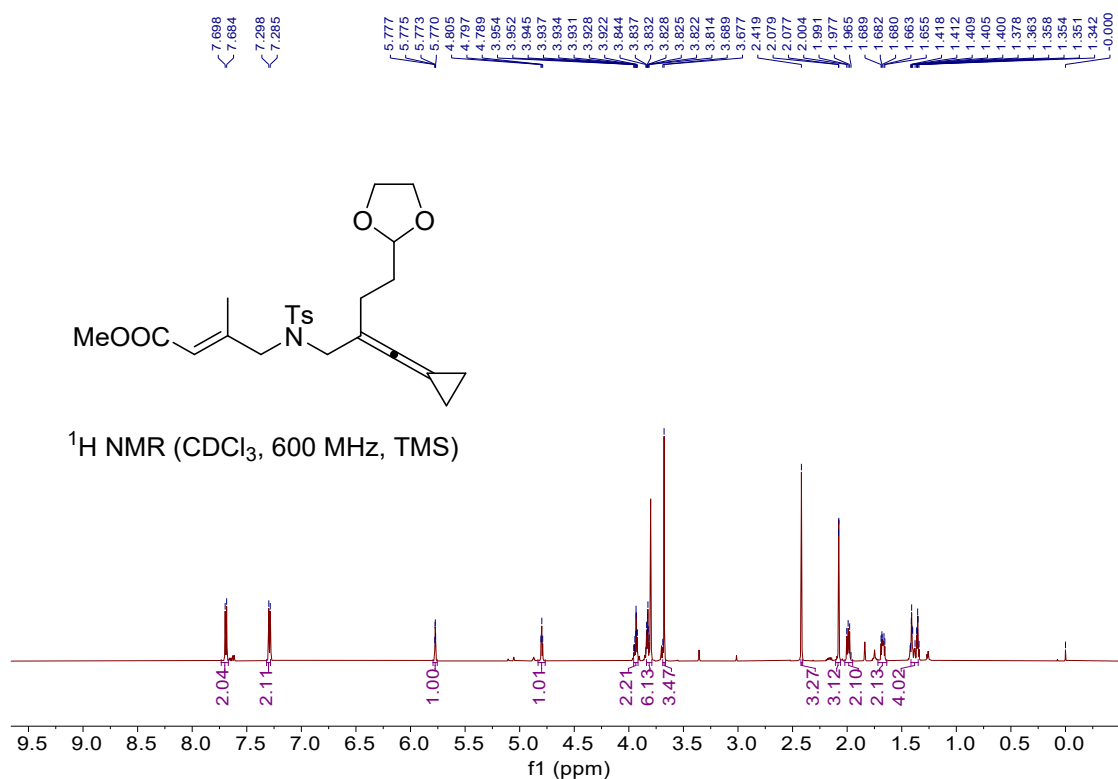

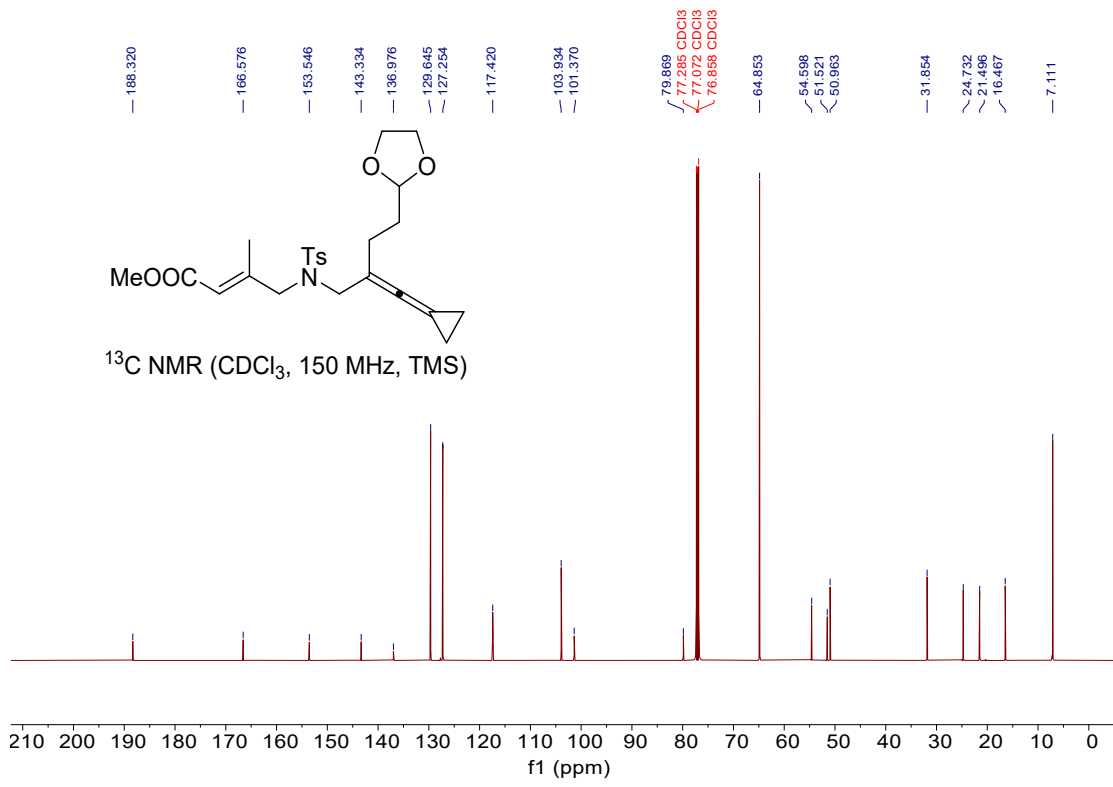

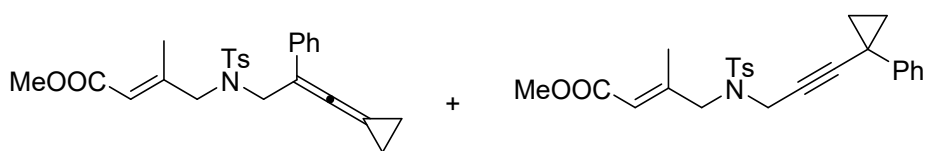

**methyl (E)-4-((N-(3-cyclopropylidene-2-phenyl- $\lambda^5$ -allyl)-4-methylphenyl)sulfonamido)-3-methylbut-2-enoate (11)+ methyl (E)-3-methyl-4-((4-methyl-N-(3-(1-phenylcyclopropyl)prop-2-yn-1-yl)phenyl)sulfonamido)but-2-enoate (byproduct 11') (11: 11'=4:1)**

A colorless oil, 90% yield, 338.4 mg.  $^1\text{H}$  NMR (400 MHz,  $\text{CDCl}_3$ )  $\delta$  7.70 – 7.66 (m, 2H), 7.36 – 7.24 (m, 7H), 5.68 (q,  $J = 1.2$  Hz, 1H), 4.27 (s, 2H), 3.74 (d,  $J = 1.2$  Hz, 2H), 3.61 (s, 3H), 2.43 (s, 3H), 1.94 (d,  $J = 1.2$  Hz, 3H), 1.67 – 1.55 (m, 4H).  $^{13}\text{C}$  NMR (100 MHz,  $\text{CDCl}_3$ )  $\delta$  190.7, 166.6, 153.7, 143.5, 136.0, 135.4, 129.7, 128.4, 127.4, 126.2, 117.0, 102.9, 80.1, 54.9, 50.8, 50.3, 21.5, 19.7, 16.4, 8.5. IR (neat)  $\nu$  652, 769, 1351, 1660, 1722, 2005, 2951  $\text{cm}^{-1}$ . HRMS (ESI) calcd. for  $\text{C}_{25}\text{H}_{27}\text{NO}_4\text{SNa}$  ( $\text{M}+\text{Na}$ ) $^+$ : 460.1553, Found: 460.1558.

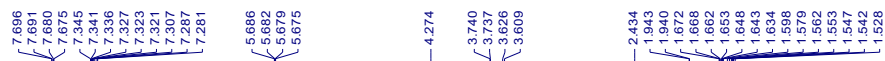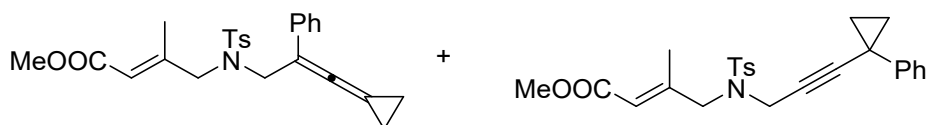

$^1\text{H}$  NMR ( $\text{CDCl}_3$ , 400 MHz, TMS)

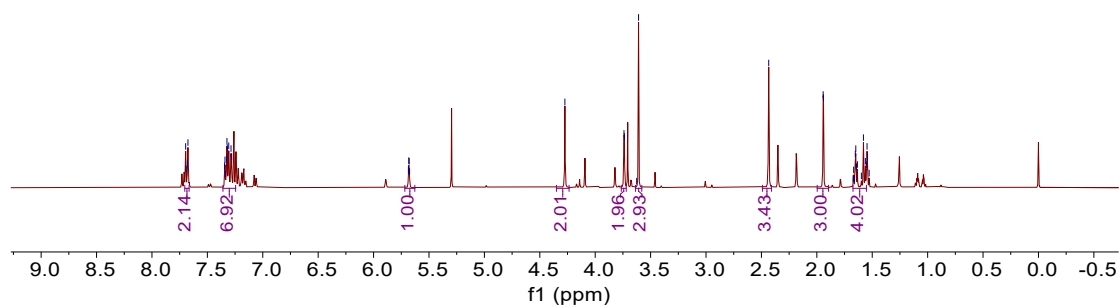



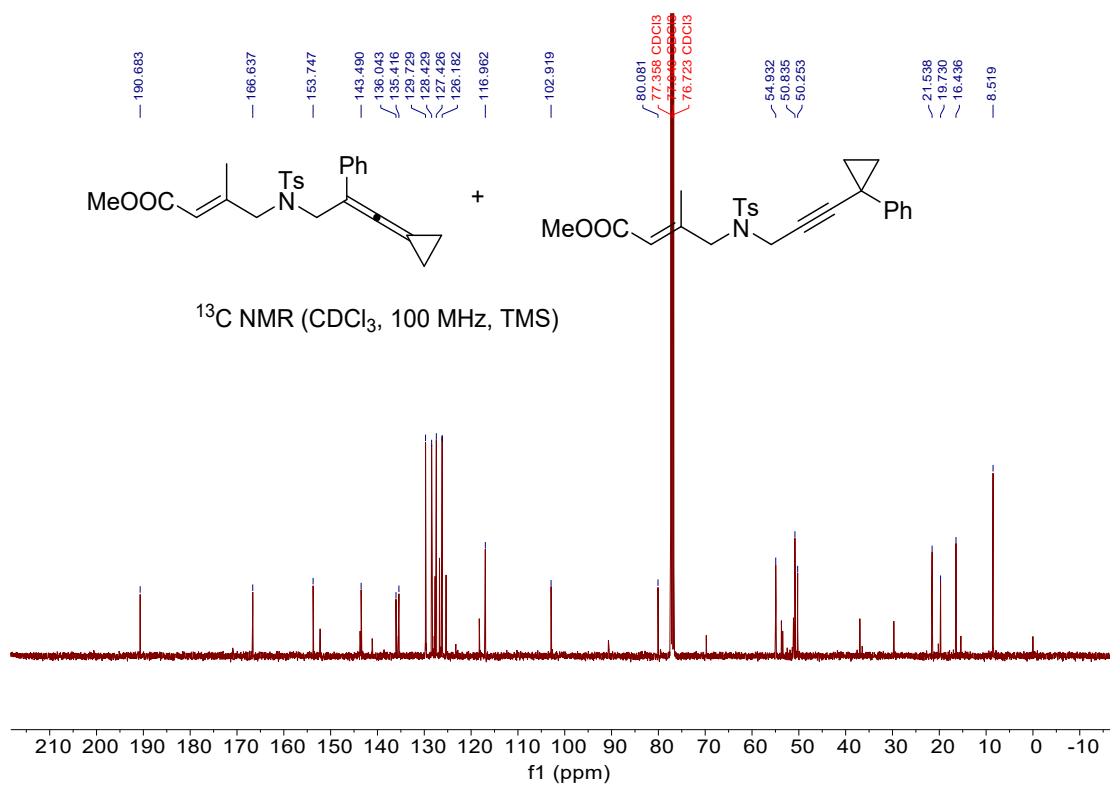

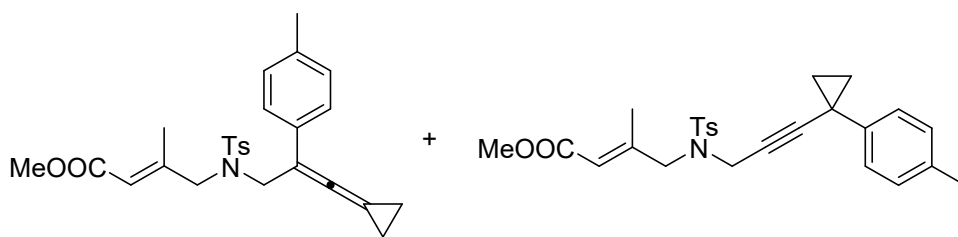

**methyl (E)-4-((N-(3-cyclopropylidene-2-(p-tolyl)-λ<sup>5</sup>-allyl)-4-methylphenyl)sulfonamido)-3-methylbut-2-enoate (1m) + methyl (E)-3-methyl-4-((4-methyl-N-(3-(1-(p-tolyl)cyclopropyl)prop-2-yn-1-yl)phenyl)sulfonamido)but-2-enoate (byproduct 1m') (1m: 1m'=5:1)**

A colorless oil, 60% yield, 270.6 mg. <sup>1</sup>H NMR (400 MHz, CDCl<sub>3</sub>) δ 7.68 (d, *J* = 8.0 Hz, 2H), 7.30 – 7.26 (m, 2H), 7.21 (d, *J* = 8.0 Hz, 2H), 7.07 (d, *J* = 8.0 Hz, 2H), 5.67 (q, *J* = 1.2 Hz, 1H), 4.25 (s, 2H), 3.74 (s, 2H), 3.61 (s, 3H), 2.43 (s, 3H), 2.32 (s, 3H), 1.95 (s, 3H), 1.62 – 1.51 (m, 4H). <sup>13</sup>C NMR (100 MHz, CDCl<sub>3</sub>) δ 190.4, 166.7, 153.8, 143.4, 136.5, 136.1, 132.4, 129.7, 129.1, 127.4, 126.1, 116.9, 102.8, 80.0, 54.9, 50.8, 50.3, 21.5, 21.1, 16.5, 16.5, 8.3. IR (neat) ν 662, 1216, 1662, 1720, 2023, 2943 cm<sup>-1</sup>. HRMS (ESI) calcd. for C<sub>26</sub>H<sub>29</sub>NO<sub>4</sub>SNa (M+Na)<sup>+</sup>: 474.1710, Found: 474.1714.

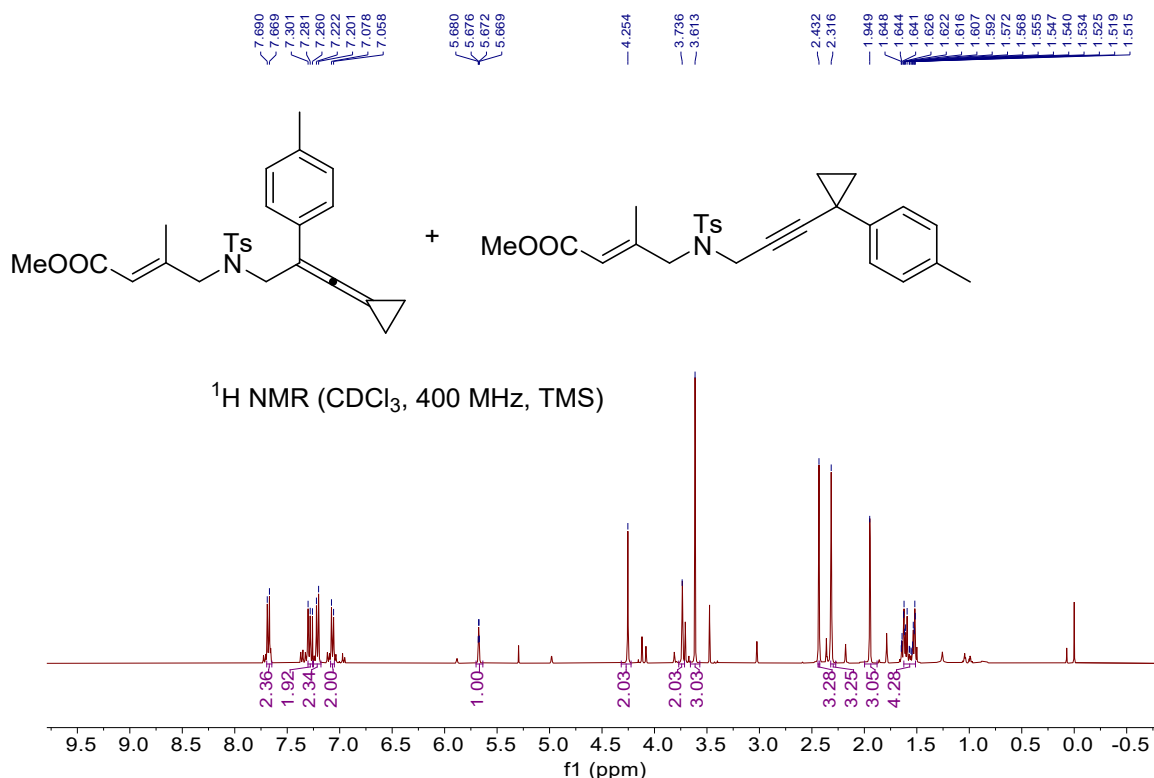

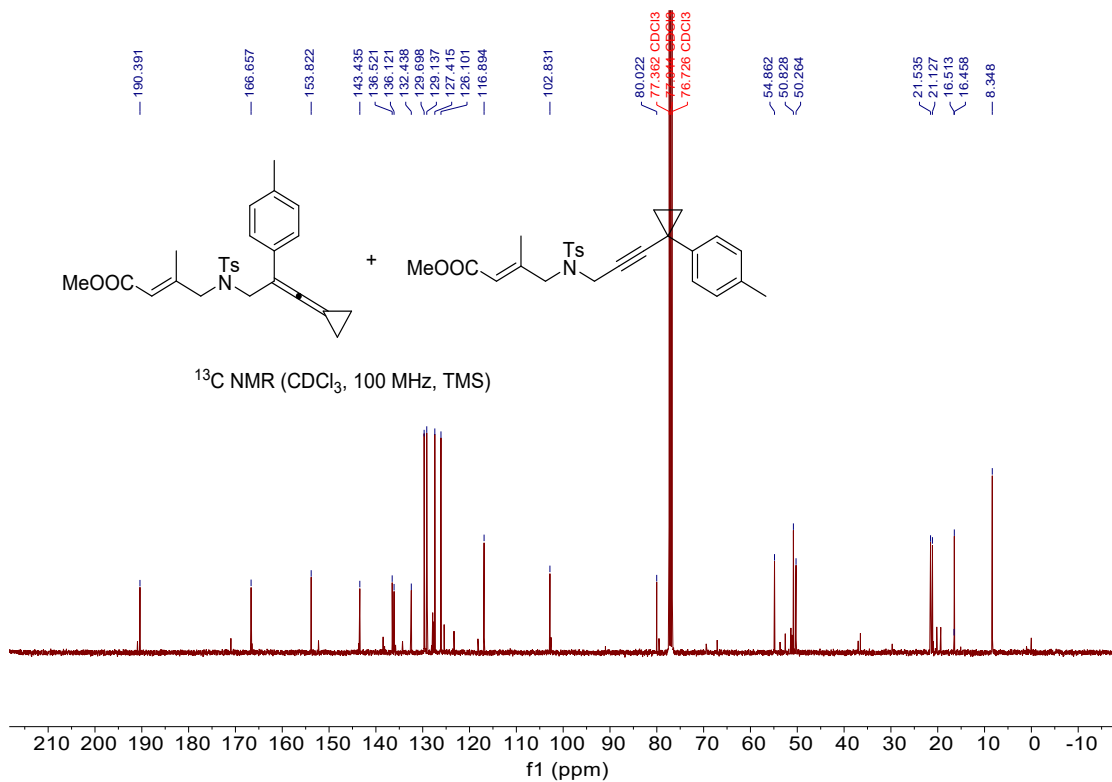

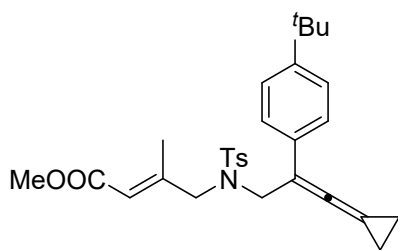

**methyl (E)-4-((N-(2-(4-(tert-butyl)phenyl)-3-cyclopropylidene- $\lambda^5$ -allyl)-4-methylphenyl)sulfonamido)-3-methylbut-2-enoate (1n)**

A colorless oil, 60% yield, 295.8 mg.  $^1\text{H}$  NMR (400 MHz,  $\text{CDCl}_3$ )  $\delta$  7.68 (d,  $J = 8.0$  Hz, 2H), 7.32 – 7.25 (m, 6H), 5.68 (q,  $J = 1.2$  Hz, 1H), 4.27 (s, 2H), 3.75 (s, 2H), 3.61 (s, 3H), 2.43 (s, 3H), 1.96 (s, 3H), 1.63 – 1.58 (m, 2H), 1.55 – 1.48 (m, 2H), 1.30 (s, 9H).  $^{13}\text{C}$  NMR (100 MHz,  $\text{CDCl}_3$ )  $\delta$  190.5, 166.7, 153.8, 149.8, 143.4, 136.2, 132.4, 129.7, 127.4, 125.9, 125.3, 116.8, 102.7, 80.0, 54.8, 50.8, 50.1, 34.5, 31.3, 21.5, 16.5, 8.4. IR (neat)  $\nu$  654, 1094, 1351, 1660, 1722, 2009, 2963  $\text{cm}^{-1}$ . HRMS (ESI) calcd. for  $\text{C}_{29}\text{H}_{35}\text{NO}_4\text{SNa}$  ( $\text{M}+\text{Na}$ ) $^+$ : 516.2179, Found: 516.2173.

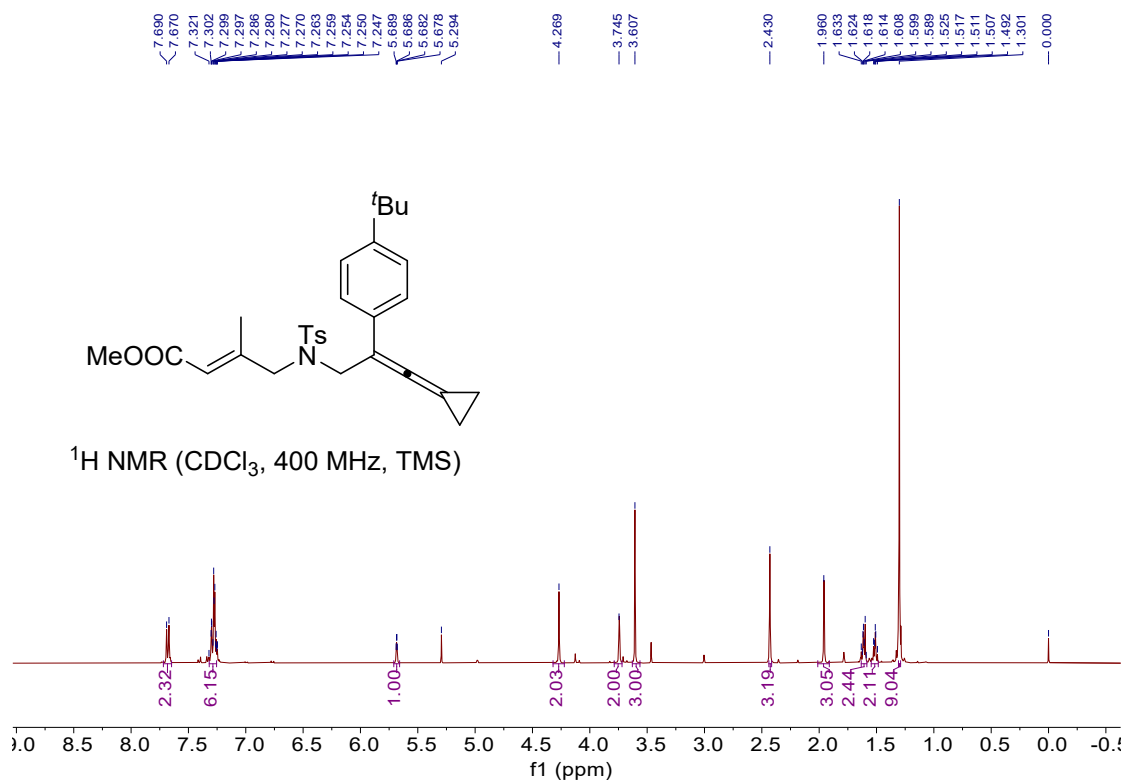

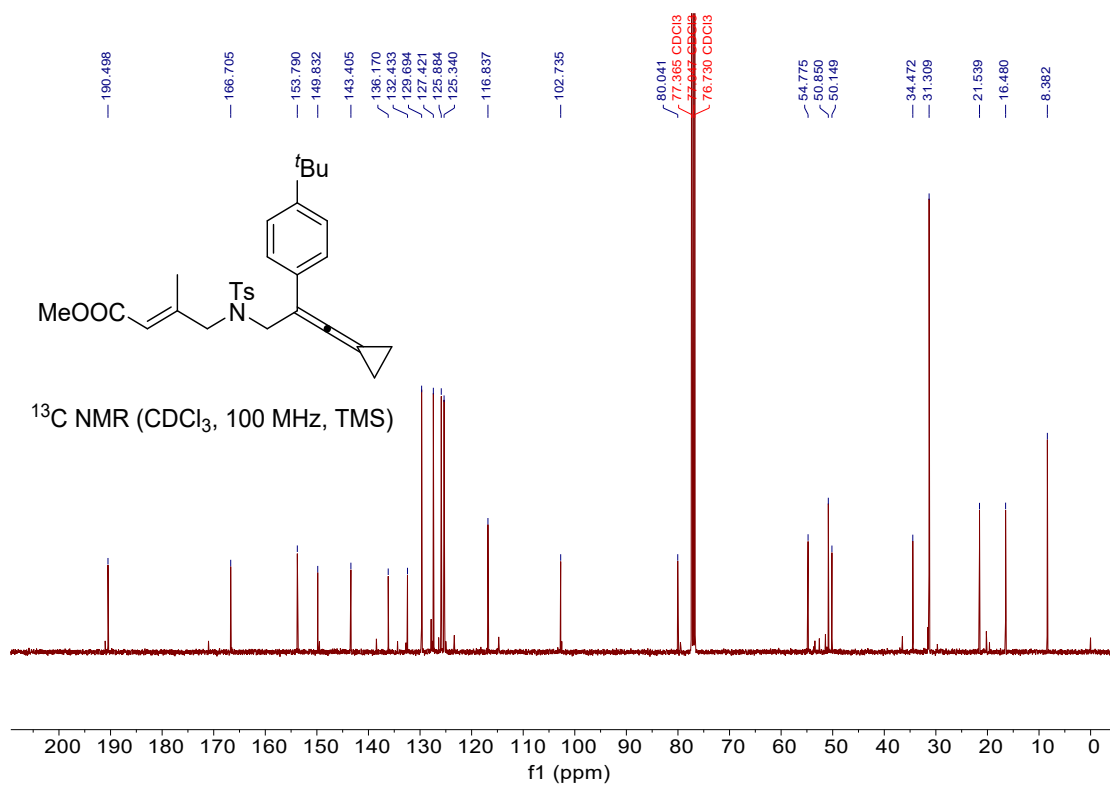

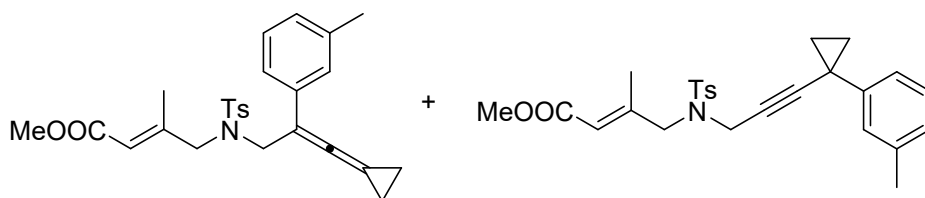

methyl (E)-4-((N-(3-cyclopropylidene-2-(m-tolyl)-λ<sup>5</sup>-allyl)-4-methylphenyl)sulfonamido)-3-methylbut-2-enoate (1o) + methyl (E)-3-methyl-4-((4-methyl-N-(3-(1-(m-tolyl)cyclopropyl)prop-2-yn-1-yl)phenyl)sulfonamido)but-2-enoate (byproduct 1o') (1m:1m'=5:1)

A colorless oil, 60% yield, 270.6 mg. <sup>1</sup>H NMR (400 MHz, CDCl<sub>3</sub>) δ 7.68 (d, *J* = 8.0 Hz, 2H), 7.29 (d, *J* = 8.0 Hz, 2H), 7.17 – 7.08 (m, 3H), 7.02 – 6.97 (m, 1H), 5.69 (q, *J* = 1.2 Hz, 1H), 4.27 (s, 2H), 3.75 (s, 2H), 3.62 (s, 3H), 2.43 (s, 3H), 2.30 (s, 3H), 1.96 (s, 3H), 1.68 – 1.62 (m, 2H), 1.57 – 1.51 (m, 2H). <sup>13</sup>C NMR (100 MHz, CDCl<sub>3</sub>) δ 190.6, 166.6, 153.7, 143.4, 137.9, 137.9, 136.3, 135.4, 129.7, 128.3, 127.6, 127.4, 126.9, 123.3, 117.0, 103.0, 80.0, 54.8, 50.8, 50.0, 21.5, 21.5, 16.4, 8.5. IR (neat) ν 677, 1161, 1221, 1653, 1722, 2017, 2962 cm<sup>-1</sup>. HRMS (ESI) calcd. for C<sub>26</sub>H<sub>29</sub>NO<sub>4</sub>SNa (M+Na)<sup>+</sup>: 474.1710, Found: 474.1701.

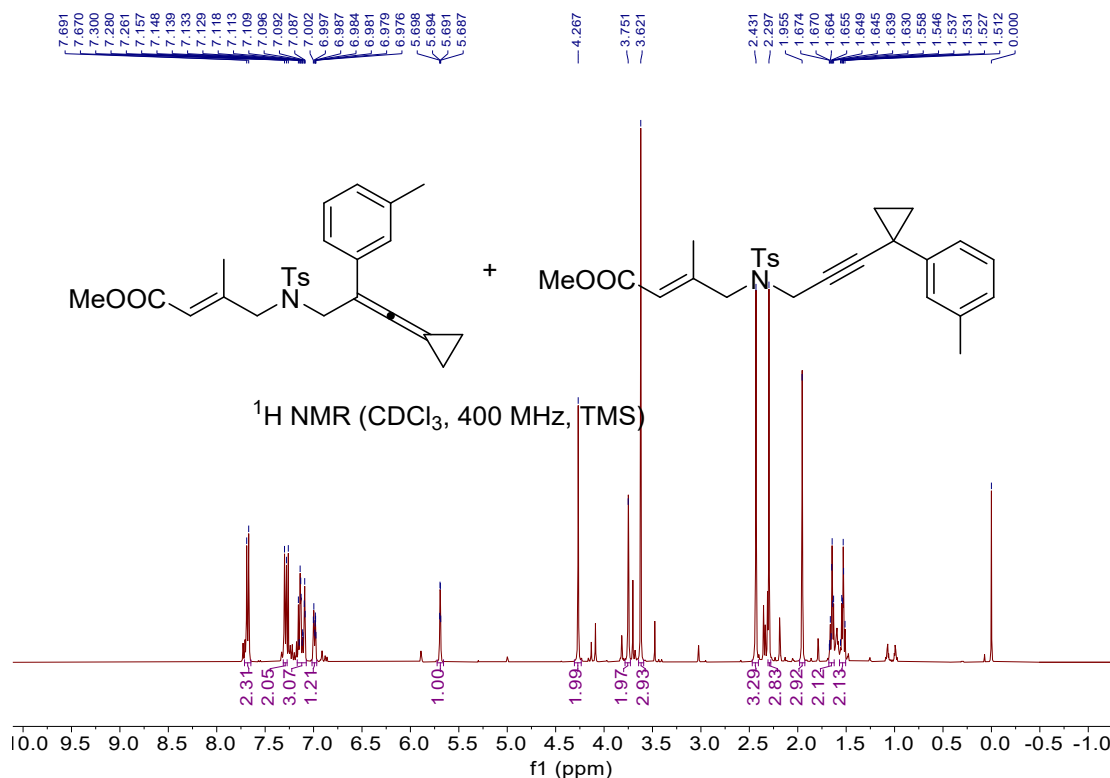

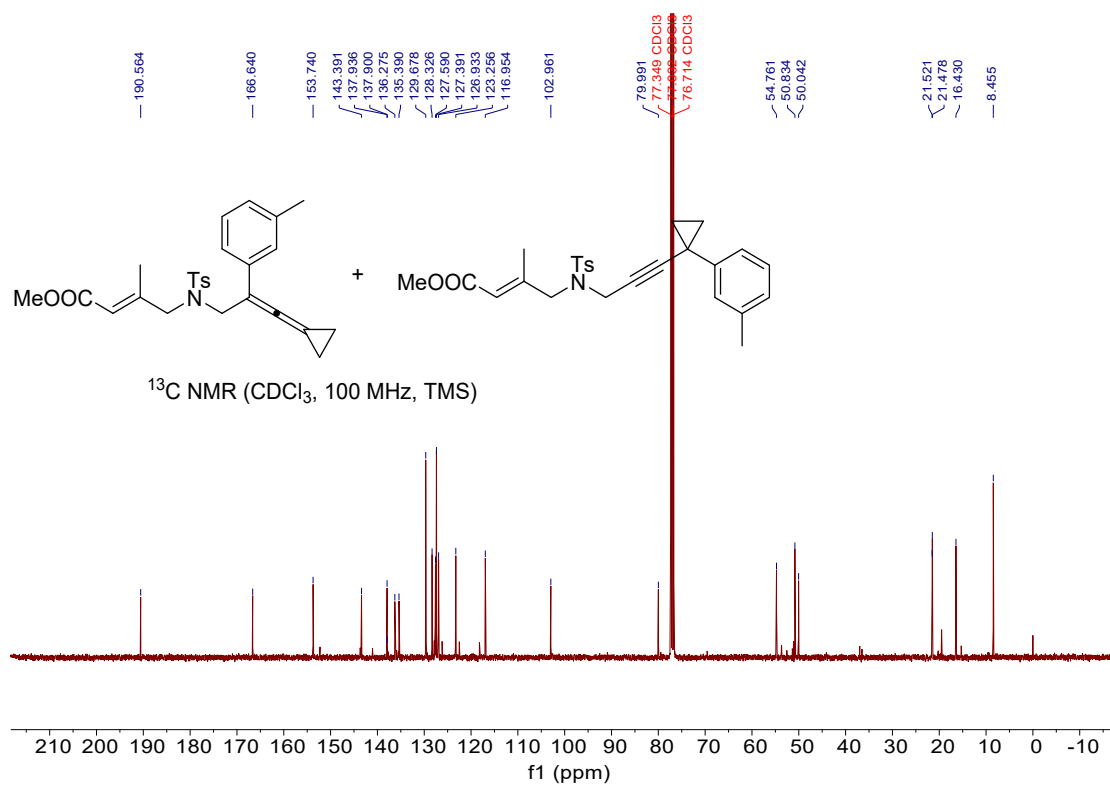

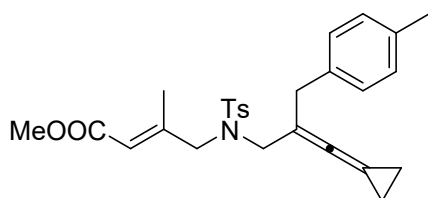

**methyl (E)-4-((N-(3-cyclopropylidene-2-(4-methylbenzyl)-λ<sup>5</sup>-allyl)-4-methylphenyl)sulfonamido)-3-methylbut-2-enoate (1p)**

A colorless oil, 90% yield, 419.4 mg. <sup>1</sup>H NMR (400 MHz, CDCl<sub>3</sub>) δ 7.65 (d, *J* = 8.0 Hz, 2H), 7.27 (d, *J* = 8.0 Hz, 2H), 7.09 – 7.00 (m, 4H), 5.76 (q, *J* = 1.2 Hz, 1H), 3.79 (s, 2H), 3.73 (s, 2H), 3.68 (s, 3H), 3.22 (s, 2H), 2.41 (s, 3H), 2.31 (s, 3H), 2.07 (d, *J* = 1.2 Hz, 3H), 1.32 - 1.35 (m, 4H). <sup>13</sup>C NMR (100 MHz, CDCl<sub>3</sub>) δ 189.7, 166.6, 153.7, 143.4, 136.8, 136.0, 135.7, 129.6, 128.9, 128.8, 127.3, 117.3, 101.4, 79.0, 54.9, 51.0, 50.8, 37.0, 21.5, 21.1, 16.5, 7.2. IR (neat) ν 661, 71158, 1346, 1134, 1653, 1725, 2021, 2922 cm<sup>-1</sup>. HRMS (ESI) calcd. for C<sub>27</sub>H<sub>31</sub>NO<sub>4</sub>SNa (M+Na)<sup>+</sup>: 488.1866, Found: 488.1866.

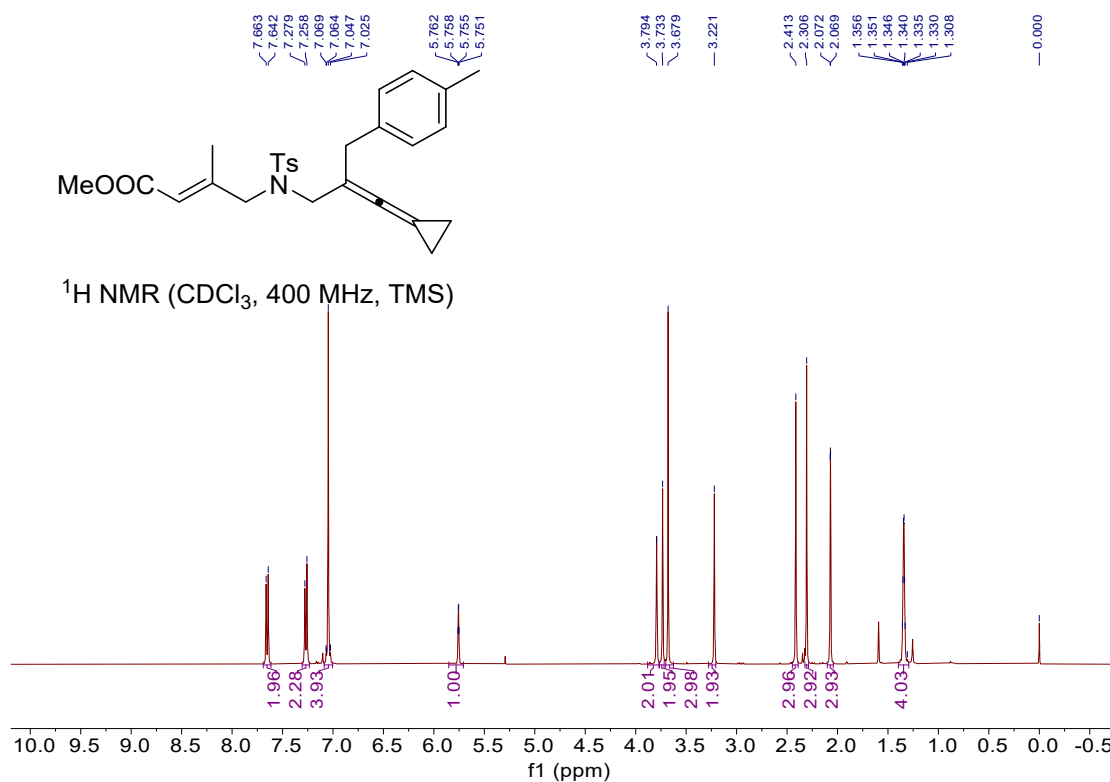



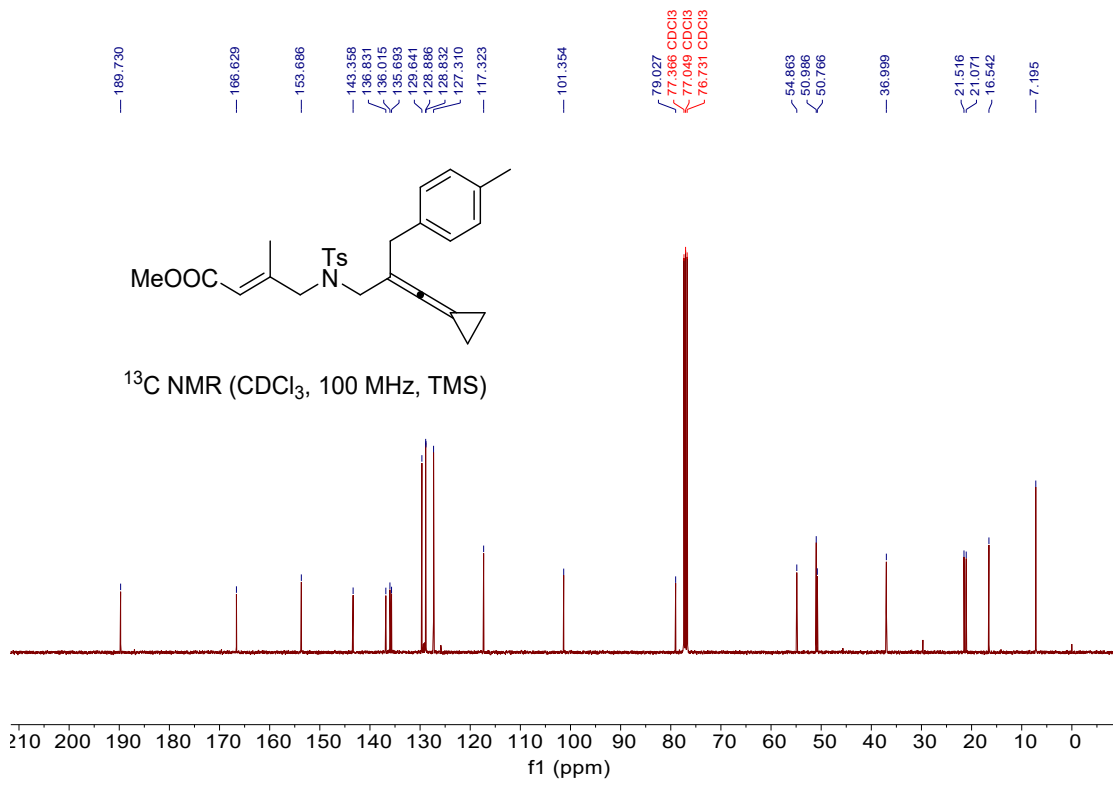

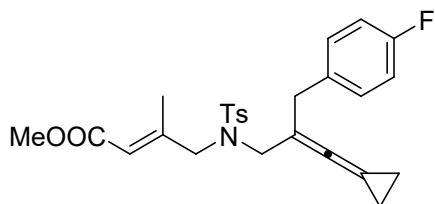

**methyl (E)-4-((N-(3-cyclopropylidene-2-(4-fluorobenzyl)-λ<sup>5</sup>-allyl)-4-methylphenyl)sulfonamido)-3-methylbut-2-enoate (1q)**

A colorless oil, 80% yield, 375.2 mg. <sup>1</sup>H NMR (400 MHz, CDCl<sub>3</sub>) δ 7.66 (d, *J* = 8.0 Hz, 2H), 7.31 – 7.24 (m, 3H), 7.14 – 7.08 (m, 2H), 6.97 – 6.88 (m, 2H), 5.78 – 5.72 (m, 1H), 3.82 – 3.77 (m, 2H), 3.73 (s, 2H), 3.68 (s, 3H), 3.26 (s, 2H), 2.42 (s, 3H), 2.07 (d, *J* = 1.3 Hz, 3H), 1.36 – 1.30 (m, 4H). <sup>13</sup>C NMR (100 MHz, CDCl<sub>3</sub>) δ 189.7, 166.6, 161.5 (d, *J*<sub>C-F</sub> = 242.4 Hz), 153.6, 143.5, 136.7, 134.78, 134.81, 130.5 (d, *J*<sub>C-F</sub> = 7.9 Hz), 129.7, 127.3, 117.5, 114.8 (d, *J*<sub>C-F</sub> = 21.1 Hz), 101.4, 79.3, 55.0, 51.01, 51.00, 36.5, 21.54, 21.52, 16.5, 7.3. <sup>19</sup>F NMR (376 MHz, CDCl<sub>3</sub>) δ 117.1. IR (neat) ν 660, 1092, 1221, 1508, 1662, 1724, 2025, 2949 cm<sup>-1</sup>. HRMS (ESI) calcd. for C<sub>26</sub>H<sub>28</sub>NO<sub>4</sub>FSNa (M+Na)<sup>+</sup>: 492.1615, Found: 492.1608.

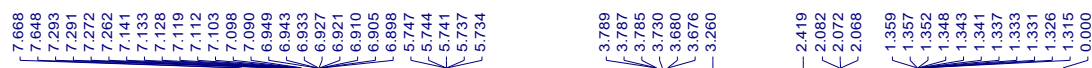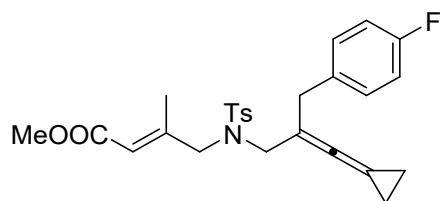

<sup>1</sup>H NMR (CDCl<sub>3</sub>, 400 MHz, TMS)

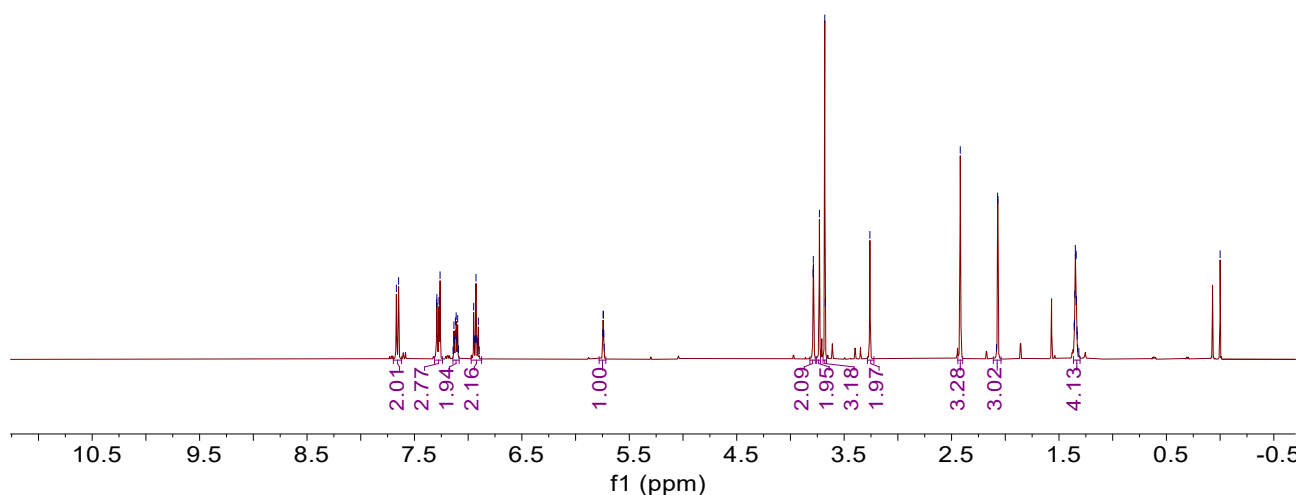

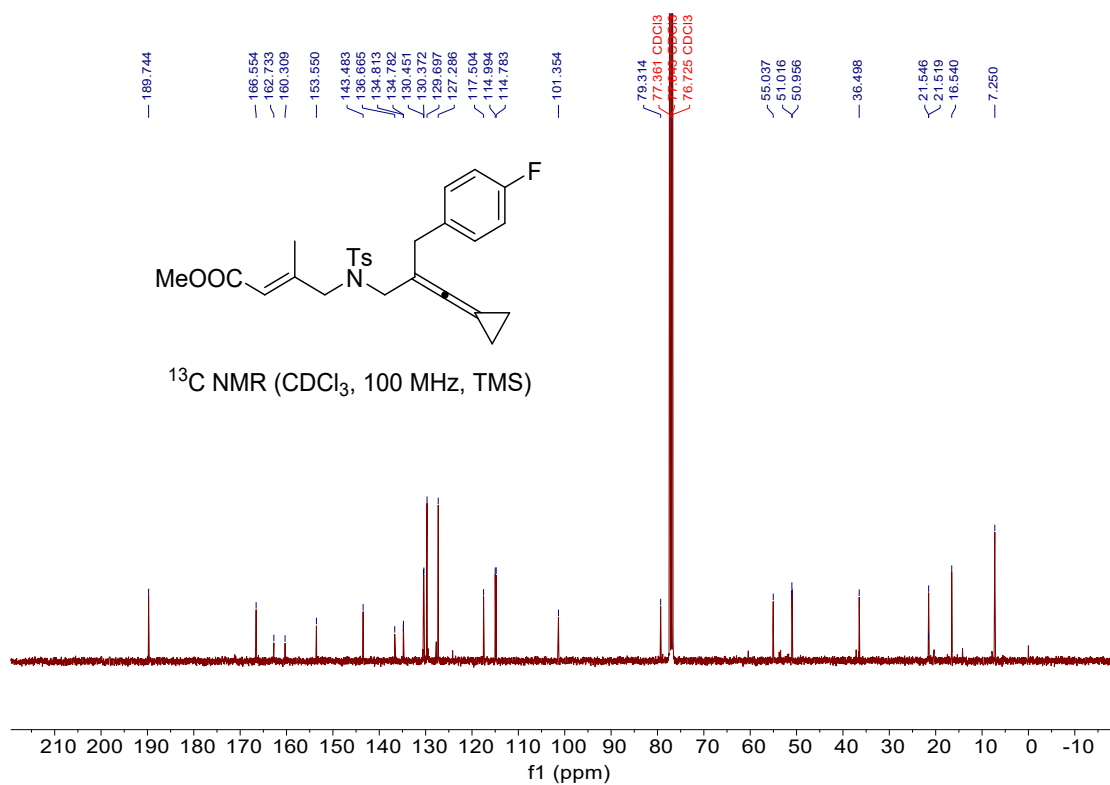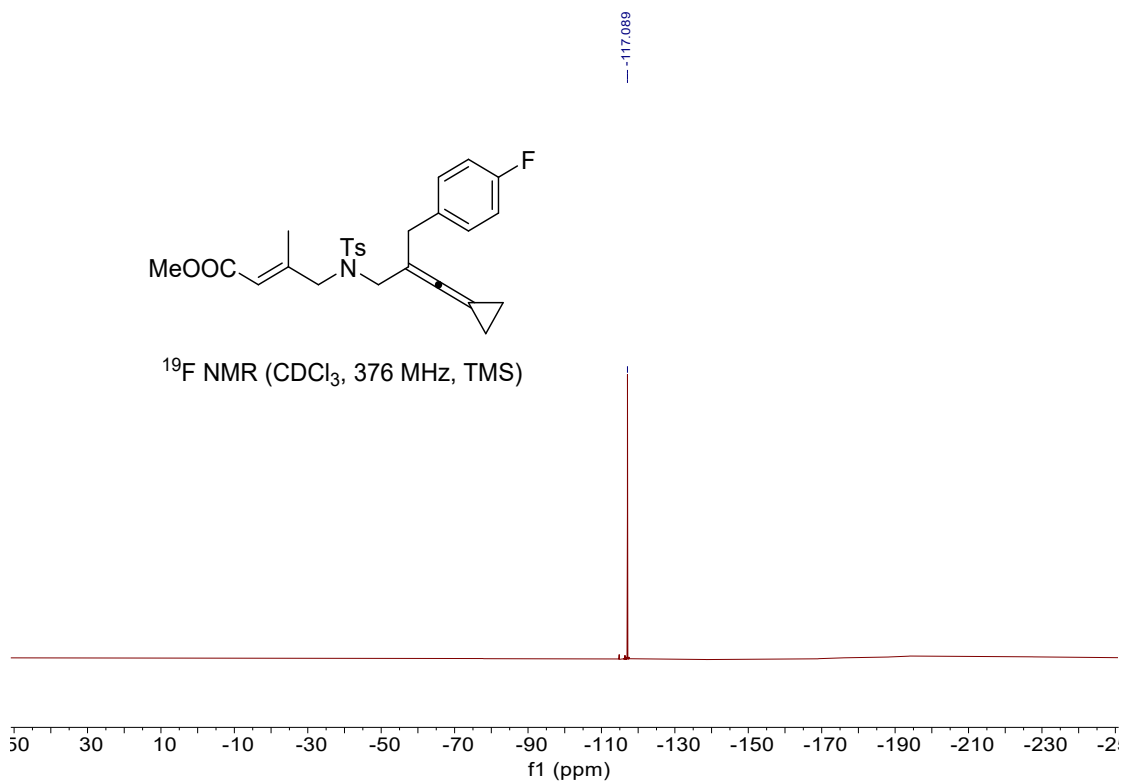

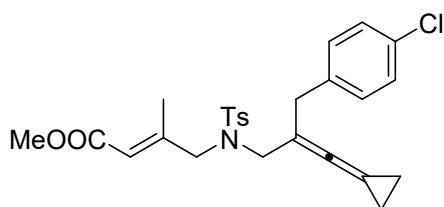

**methyl (E)-4-((N-(2-(4-chlorobenzyl)-3-cyclopropylidene- $\lambda^5$ -allyl)-4-methylphenyl)sulfonamido)-3-methylbut-2-enoate (1r)**

A yellow oil, 80% yield, 388.4 mg.  $^1\text{H}$  NMR (400 MHz,  $\text{CDCl}_3$ )  $\delta$  7.66 (d,  $J = 8.0$  Hz, 2H), 7.28 (d,  $J = 8.0$  Hz, 2H), 7.14 – 7.08 (m, 2H), 6.96 – 6.90 (m, 2H), 5.75 (q,  $J = 1.2$  Hz, 1H), 3.79 (s, 2H), 3.73 (s, 2H), 3.68 (s, 3H), 3.26 (s, 2H), 2.42 (s, 3H), 2.07 (d,  $J = 1.2$  Hz, 3H), 1.37 – 1.32 (m, 4H).  $^{13}\text{C}$  NMR (100 MHz,  $\text{CDCl}_3$ )  $\delta$  190.4, 166.7, 153.8, 143.4, 136.5, 136.1, 132.4, 129.7, 129.1, 127.4, 126.1, 116.9, 102.8, 80.0, 54.9, 50.8, 50.3, 21.5, 21.1, 16.5, 16.5, 8.3. IR (neat)  $\nu$  657, 908, 1216, 1351, 1661, 1722, 2021, 2923  $\text{cm}^{-1}$ . HRMS (ESI) calcd. for  $\text{C}_{26}\text{H}_{28}\text{NO}_4\text{SNaCl}$  ( $\text{M}+\text{Na}$ ) $^+$ : 508.1320, Found: 508.1321.

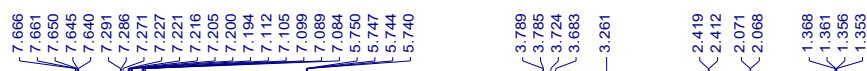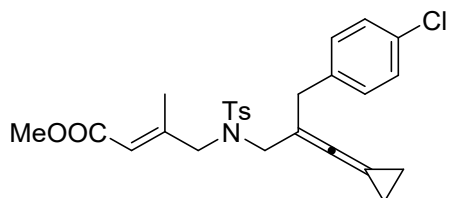

$^1\text{H}$  NMR ( $\text{CDCl}_3$ , 400 MHz, TMS)

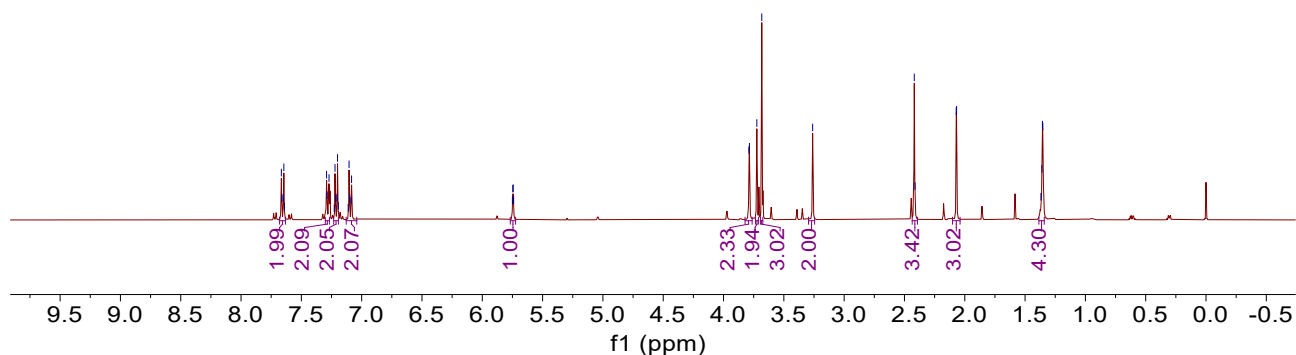

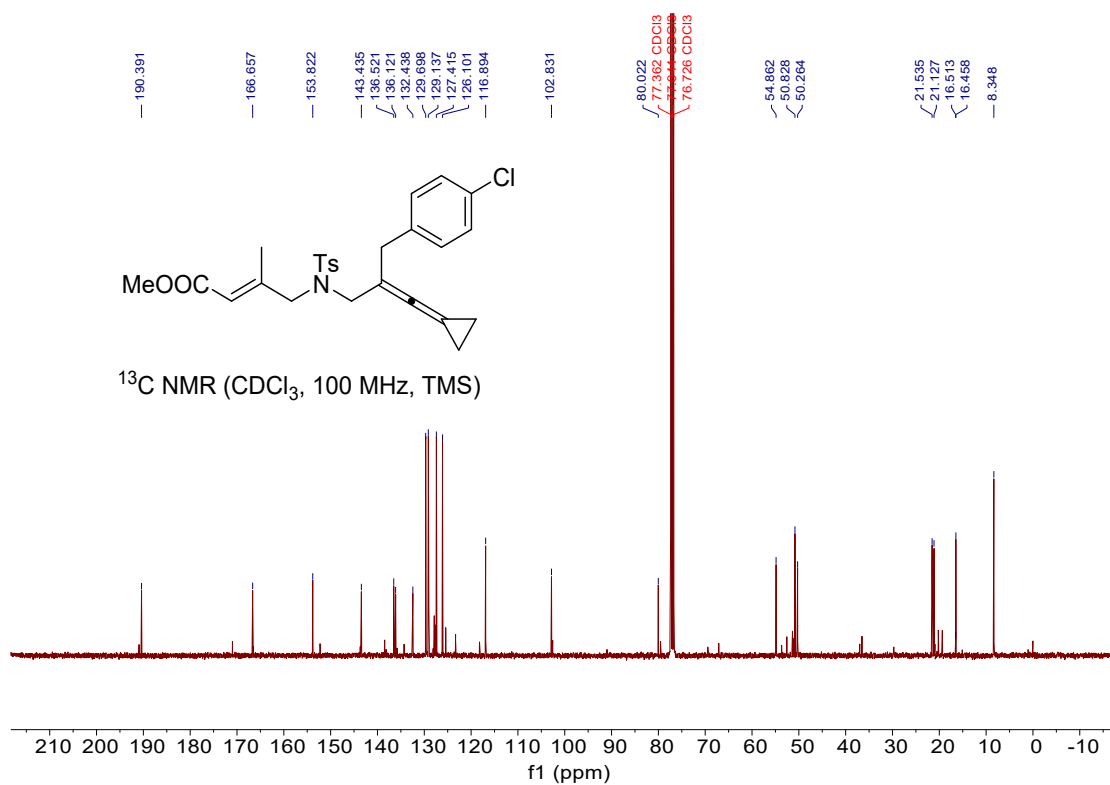

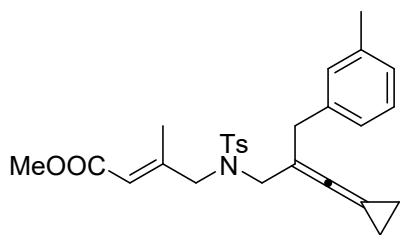

**methyl (E)-4-((N-(3-cyclopropylidene-2-(3-methylbenzyl)-λ<sup>5</sup>-allyl)-4-methylphenyl)sulfonamido)-3-methylbut-2-enoate (1s)**

A colorless oil, 70% yield, 332.5 mg. <sup>1</sup>H NMR (400 MHz, CDCl<sub>3</sub>) δ 7.66 (d, *J* = 8.0 Hz, 2H), 7.28 (d, *J* = 8.0 Hz, 2H), 7.14 (t, *J* = 7.4 Hz, 1H), 6.97 (q, *J* = 7.4 Hz, 3H), 5.77 (q, *J* = 1.2 Hz, 1H), 3.80 (s, 2H), 3.74 (s, 2H), 3.68 (s, 3H), 3.22 (s, 2H), 2.42 (s, 3H), 2.31 (s, 3H), 2.08 (d, *J* = 1.2 Hz, 3H), 1.38 – 1.32 (m, 4H). <sup>13</sup>C NMR (100 MHz, CDCl<sub>3</sub>) δ 189.7, 166.6, 153.7, 143.3, 139.0, 137.7, 136.8, 129.8, 129.6, 128.1, 127.3, 127.0, 126.0, 117.3, 101.3, 79.1, 54.8, 51.0, 50.8, 37.4, 21.5, 21.4, 16.5, 7.2. IR (neat) ν 662, 910, 1216, 1346, 1659, 1722, 2024, 2953 cm<sup>-1</sup>. HRMS (ESI) calcd. for C<sub>27</sub>H<sub>31</sub>NO<sub>4</sub>SNa (M+Na)<sup>+</sup>: 488.1866, Found: 488.1861.

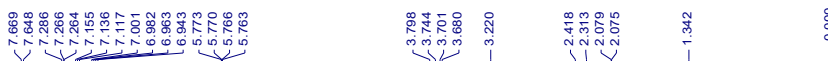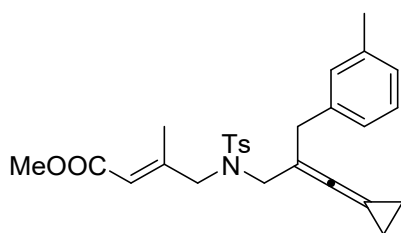

<sup>1</sup>H NMR (CDCl<sub>3</sub>, 400 MHz, TMS)

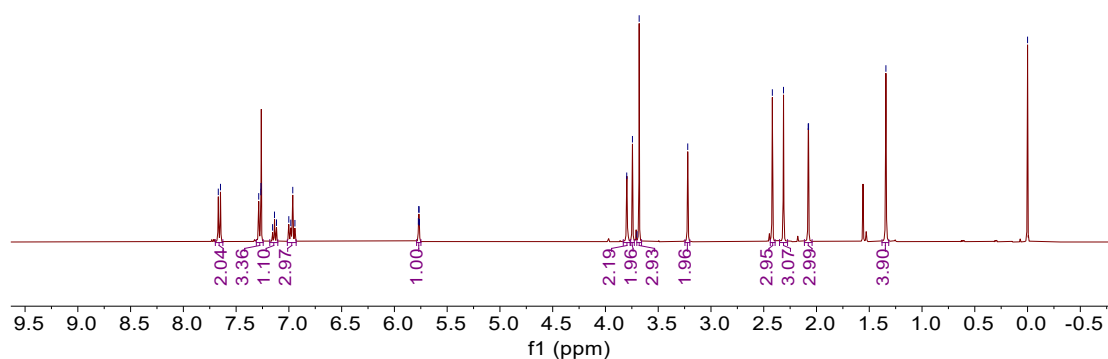

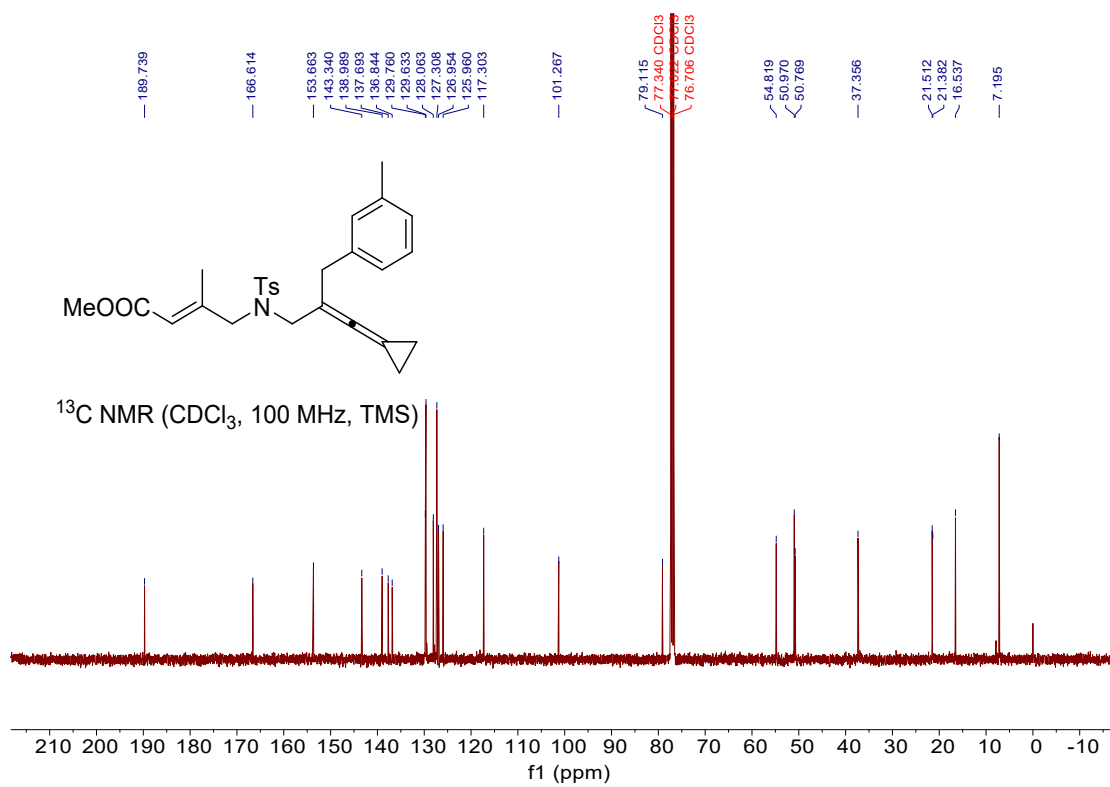

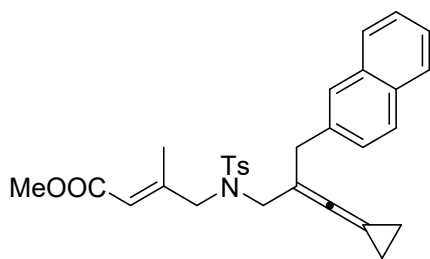

**methyl (E)-4-((N-(3-cyclopropylidene-2-(naphthalen-2-ylmethyl)-λ<sup>5</sup>-allyl)-4-methylphenyl)sulfonamido)-3-methylbut-2-enoate (1t)**

A red oil, 70% yield, 350.7 mg. <sup>1</sup>H NMR (400 MHz, CDCl<sub>3</sub>) δ 7.83 – 7.70 (m, 3H), 7.68 – 7.63 (m, 2H), 7.62 – 7.59 (m, 1H), 7.48 – 7.39 (m, 2H), 7.32 – 7.28 (m, 1H), 7.27 – 7.21 (m, 2H), 5.78 (q, *J* = 1.4 Hz, 1H), 3.82 (d, *J* = 1.4 Hz, 2H), 3.78 (s, 2H), 3.65 (s, 3H), 3.44 (s, 2H), 2.39 (s, 3H), 2.09 (d, *J* = 1.4 Hz, 3H), 1.40 – 1.28 (m, 4H). <sup>13</sup>C NMR (100 MHz, CDCl<sub>3</sub>) δ 191.0, 190.8, 167.5, 154.6, 144.4, 137.6, 137.6, 134.4, 133.2, 130.6, 130.4, 128.7, 128.6, 128.5, 128.2, 126.8, 126.3, 118.4, 102.1, 80.2, 56.0, 52.0, 51.9, 38.5, 37.9, 22.4, 17.5, 17.5, 8.8, 8.2. IR (neat) ν 675, 1096, 1346, 1656, 1726, 2031, 2927 cm<sup>-1</sup>. HRMS (ESI) calcd. for C<sub>30</sub>H<sub>31</sub>NO<sub>4</sub>SNa (M+Na)<sup>+</sup>: 524.1866, Found: 524.1873.

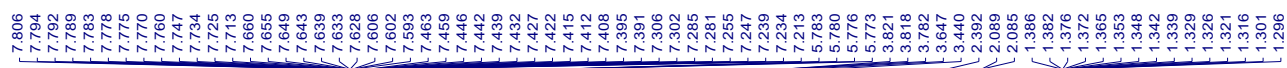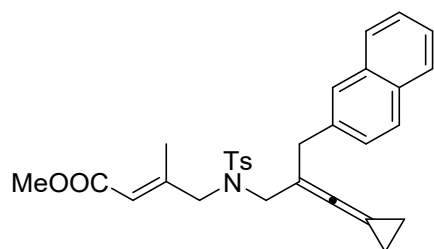

<sup>1</sup>H NMR (CDCl<sub>3</sub>, 400 MHz, TMS)

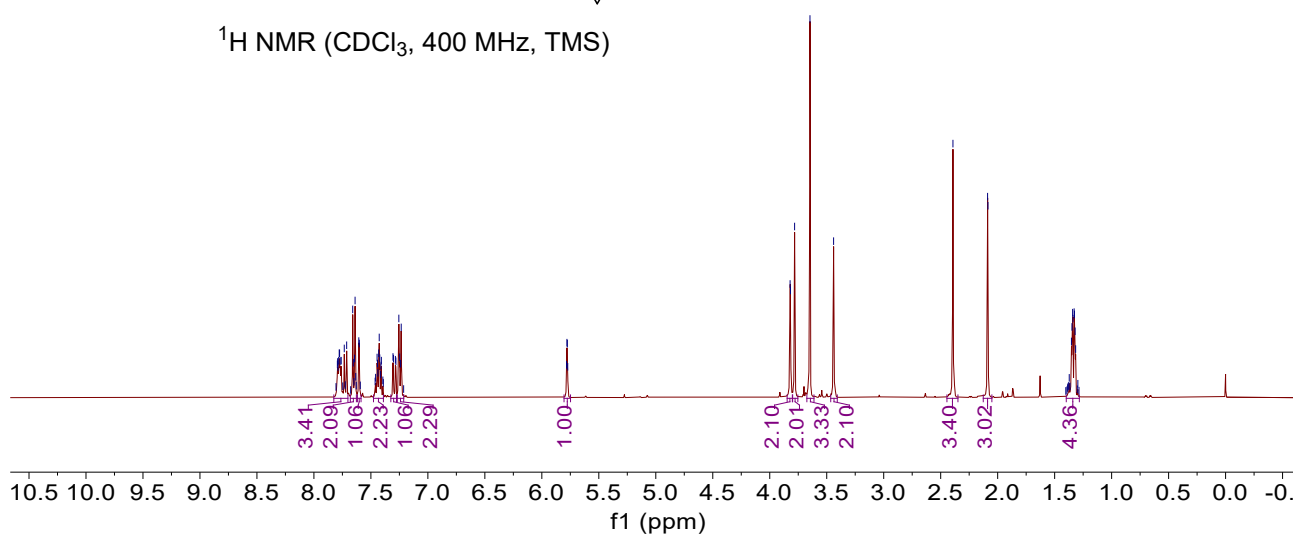



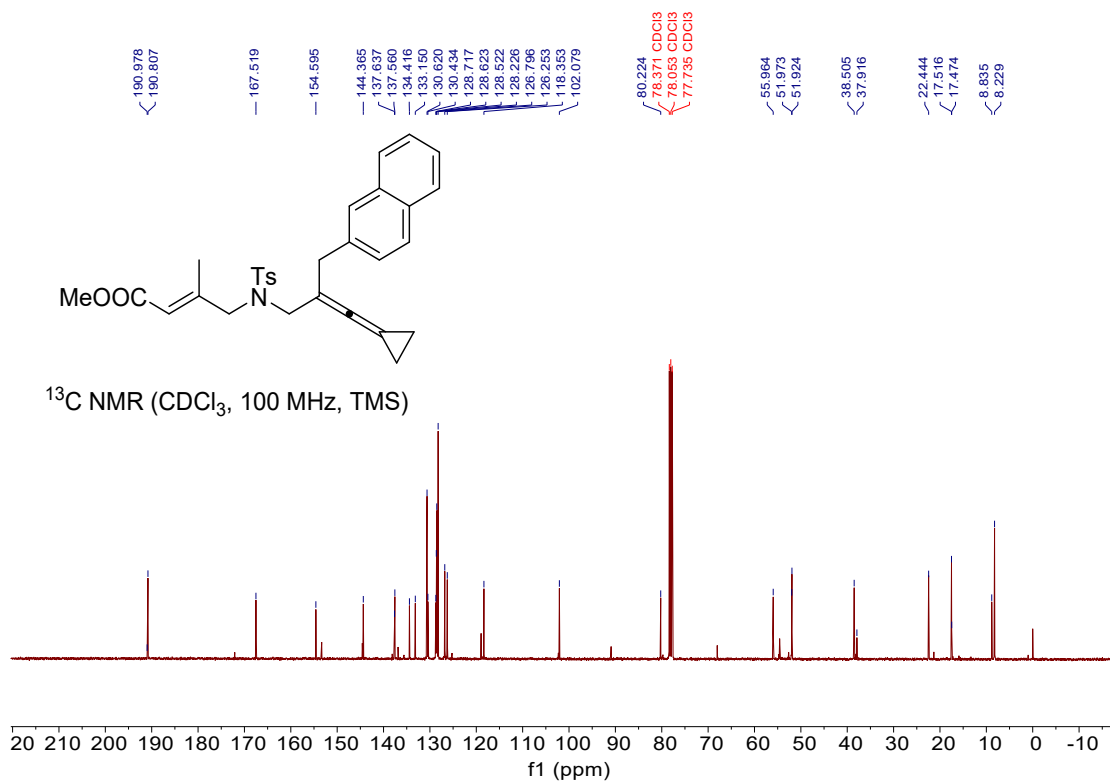

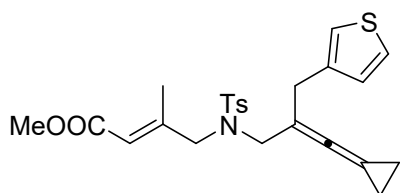

**methyl (E)-4-((N-(3-cyclopropylidene-2-(thiophen-3-ylmethyl)-λ<sup>5</sup>-allyl)-4-methylphenyl)sulfonamido)-3-methylbut-2-enoate (1u)**

A yellow oil, 80% yield, 365.6 mg. <sup>1</sup>H NMR (400 MHz, CDCl<sub>3</sub>) δ 7.66 (d, *J* = 8.0 Hz, 2H), 7.28 (d, *J* = 8.0 Hz, 2H), 7.20 (dd, *J* = 4.8, 3.2 Hz, 1H), 6.98 (dd, *J* = 2.8, 1.2 Hz, 1H), 6.89 (dd, *J* = 4.8, 1.2 Hz, 1H), 5.77 (q, *J* = 1.2 Hz, 1H), 3.79 (d, *J* = 1.2 Hz, 2H), 3.76 (s, 2H), 3.68 (s, 3H), 3.30 (s, 2H), 2.42 (s, 3H), 2.08 (d, *J* = 1.2 Hz, 3H), 1.39 – 1.35 (m, 4H). <sup>13</sup>C NMR (100 MHz, CDCl<sub>3</sub>) δ 189.6, 166.6, 153.7, 143.5, 139.3, 136.7, 129.7, 128.6, 127.3, 125.1, 121.6, 117.4, 100.7, 79.2, 55.0, 51.0, 31.8, 21.5, 16.6, 7.3. IR (neat) ν 661, 1089, 1350, 1658, 1722, 2031, 2957 cm<sup>-1</sup>. HRMS (ESI) calcd. for C<sub>24</sub>H<sub>27</sub>NO<sub>4</sub>S<sub>2</sub>Na (M+Na)<sup>+</sup>: 480.1274, Found: 480.1269.

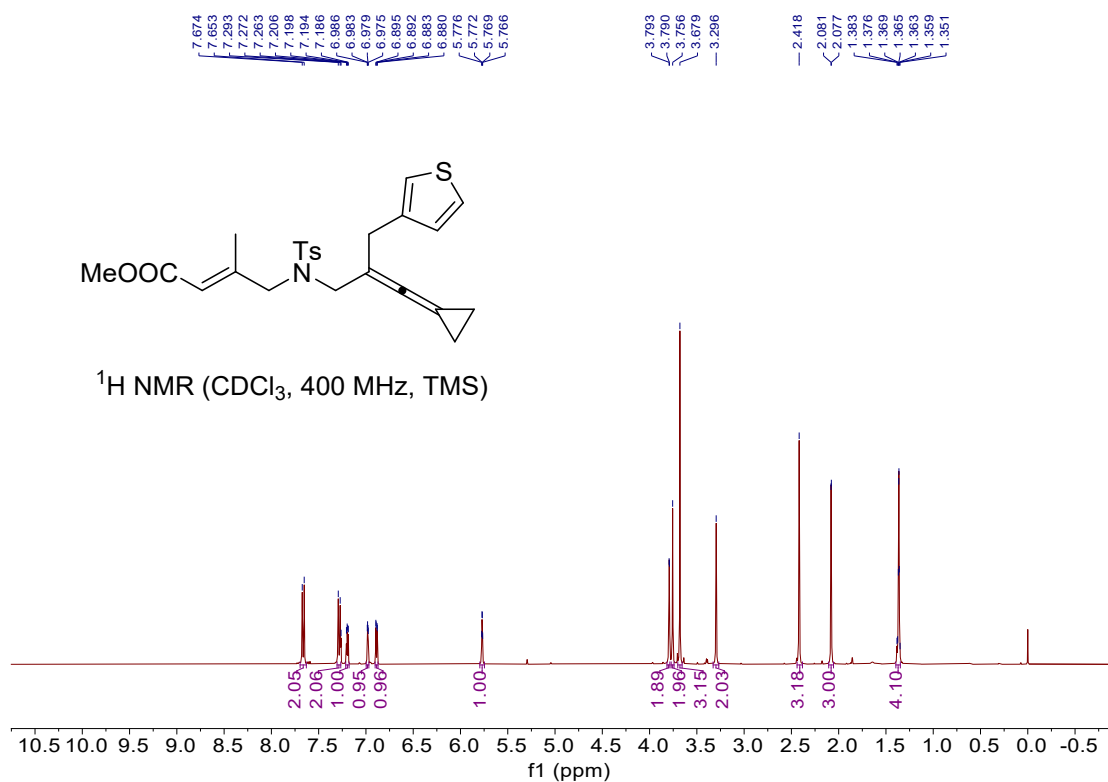

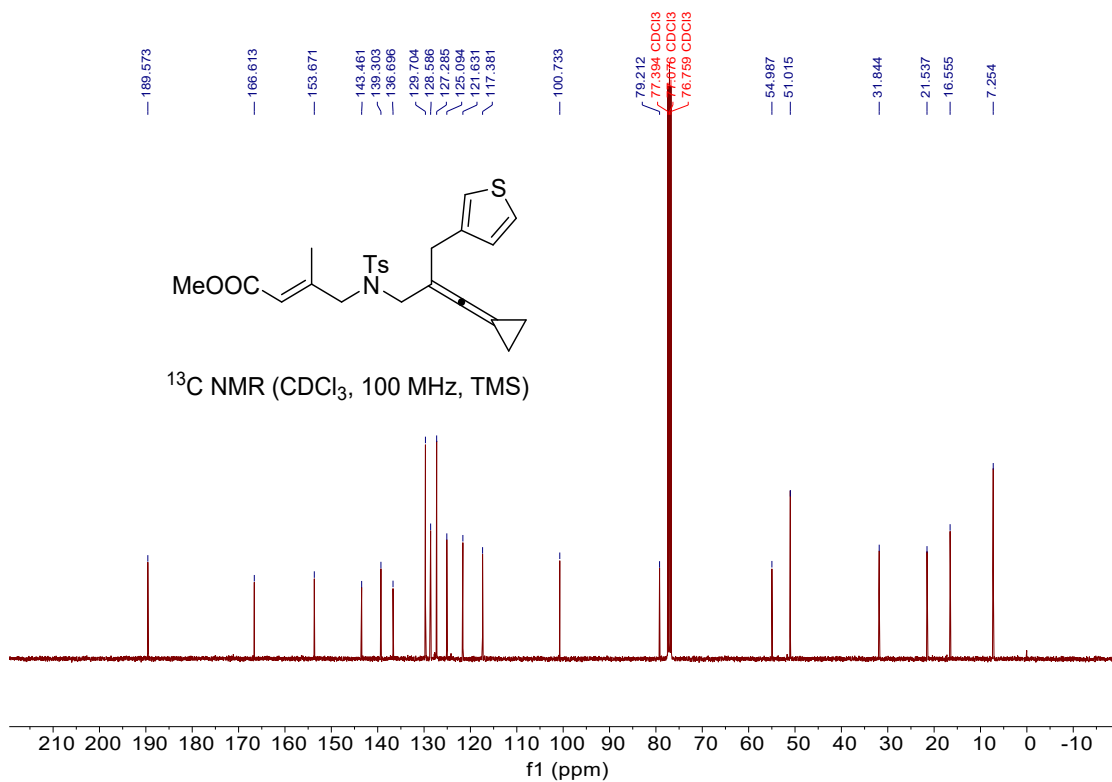

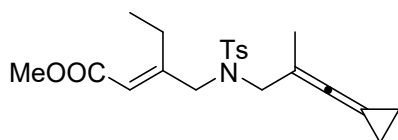

methyl

(E)-3-(((N-(3-cyclopropylidene-2-methyl-λ<sup>5</sup>-allyl)-4-

methylphenyl)sulfonamido)methyl)pent-2-enoate (1v)

A colorless oil, 80% yield, 311.4 mg. <sup>1</sup>H NMR (400 MHz, CDCl<sub>3</sub>) δ 7.71 (d, *J* = 8.0 Hz, 2H), 7.30 (d, *J* = 8.0 Hz, 2H), 5.71 (d, *J* = 1.2 Hz, 1H), 3.85 (s, 2H), 3.80 (s, 2H), 3.67 (s, 3H), 2.51 (q, *J* = 7.6 Hz, 2H), 2.42 (s, 3H), 1.61 (s, 3H), 1.45 – 1.32 (m, 4H), 1.02 (t, *J* = 7.6 Hz, 3H). <sup>13</sup>C NMR (100 MHz, CDCl<sub>3</sub>) δ 189.1, 166.3, 159.0, 143.3, 137.2, 129.6, 127.2, 116.5, 96.9, 77.7, 52.3, 51.8, 51.0, 23.0, 21.5, 17.2, 12.8, 7.0. IR (neat) ν 657, 1221, 1661, 1721, 2021, 2923 cm<sup>-1</sup>. HRMS (ESI) calcd. for C<sub>21</sub>H<sub>27</sub>NO<sub>4</sub>SNa (M+Na)<sup>+</sup>: 412.1553, Found: 412.1551.

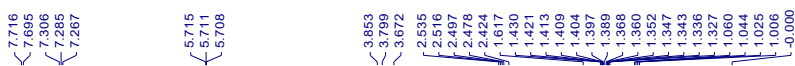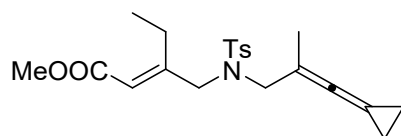

<sup>1</sup>H NMR (CDCl<sub>3</sub>, 400 MHz, TMS)

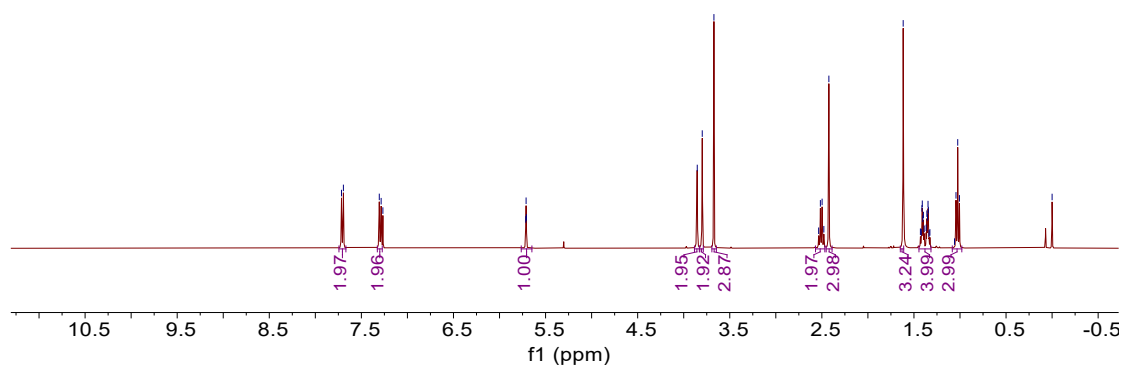

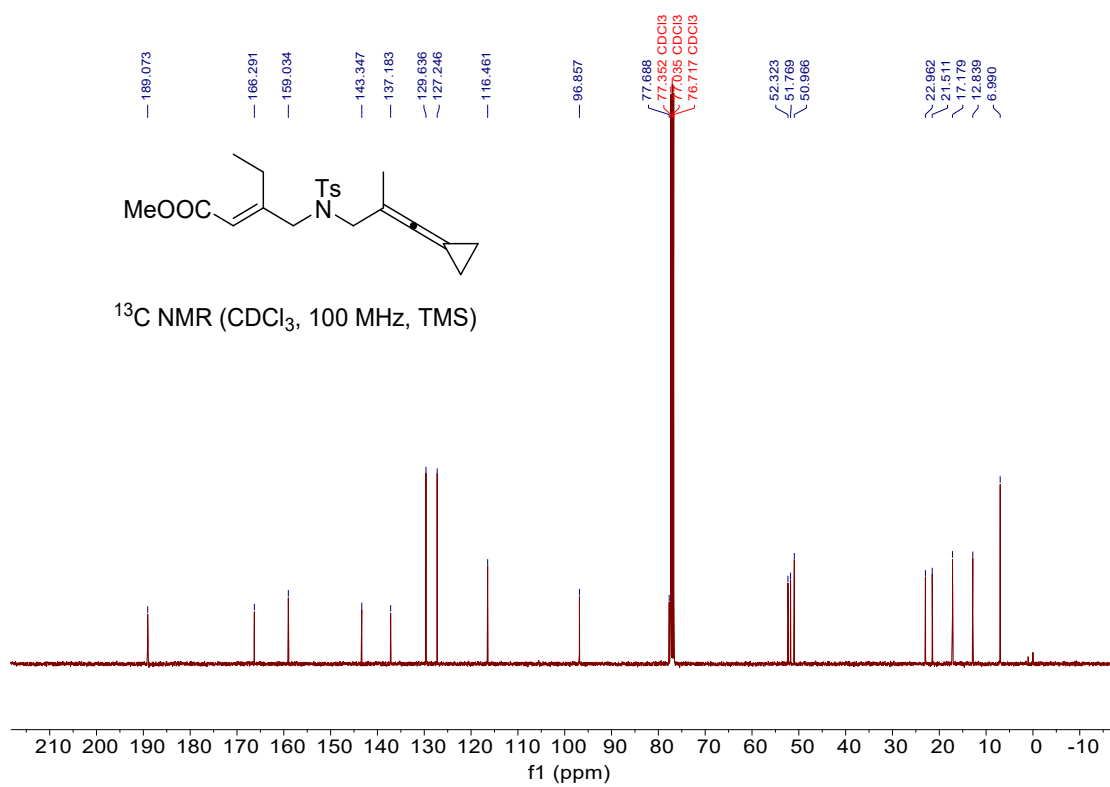

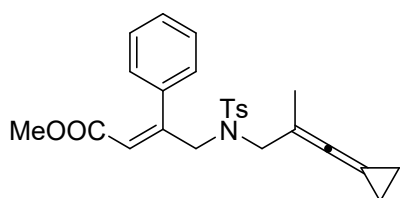

**methyl (E)-4-((N-(3-cyclopropylidene-2-methyl- $\lambda^5$ -allyl)-4-methylphenyl)sulfonamido)-3-phenylbut-2-enoate (1w)**

A colorless oil, 90% yield, 338.4 mg.  $^1\text{H}$  NMR (400 MHz,  $\text{CDCl}_3$ )  $\delta$  7.63 – 7.58 (m, 2H), 7.32 – 7.28 (m, 3H), 7.25 – 7.21 (m, 2H), 7.15 – 7.10 (m, 2H), 6.07 (d,  $J = 1.2$  Hz, 1H), 4.12 (s, 2H), 3.82 (s, 2H), 3.54 (s, 3H), 2.40 (s, 3H), 1.61 (s, 3H), 1.49 – 1.38 (m, 4H).  $^{13}\text{C}$  NMR (100 MHz,  $\text{CDCl}_3$ )  $\delta$  189.3, 165.9, 153.4, 143.3, 137.4, 137.0, 129.6, 128.2, 128.0, 127.6, 127.2, 118.3, 96.9, 77.7, 53.4, 52.7, 51.2, 21.5, 17.2, 7.1. IR (neat)  $\nu$  660, 1089, 1446, 1598, 1722, 2022, 2950  $\text{cm}^{-1}$ . HRMS (ESI) calcd. for  $\text{C}_{25}\text{H}_{27}\text{NO}_4\text{SNa}$  ( $\text{M}+\text{Na}$ ) $^+$ : 460.1553, Found: 460.1557.

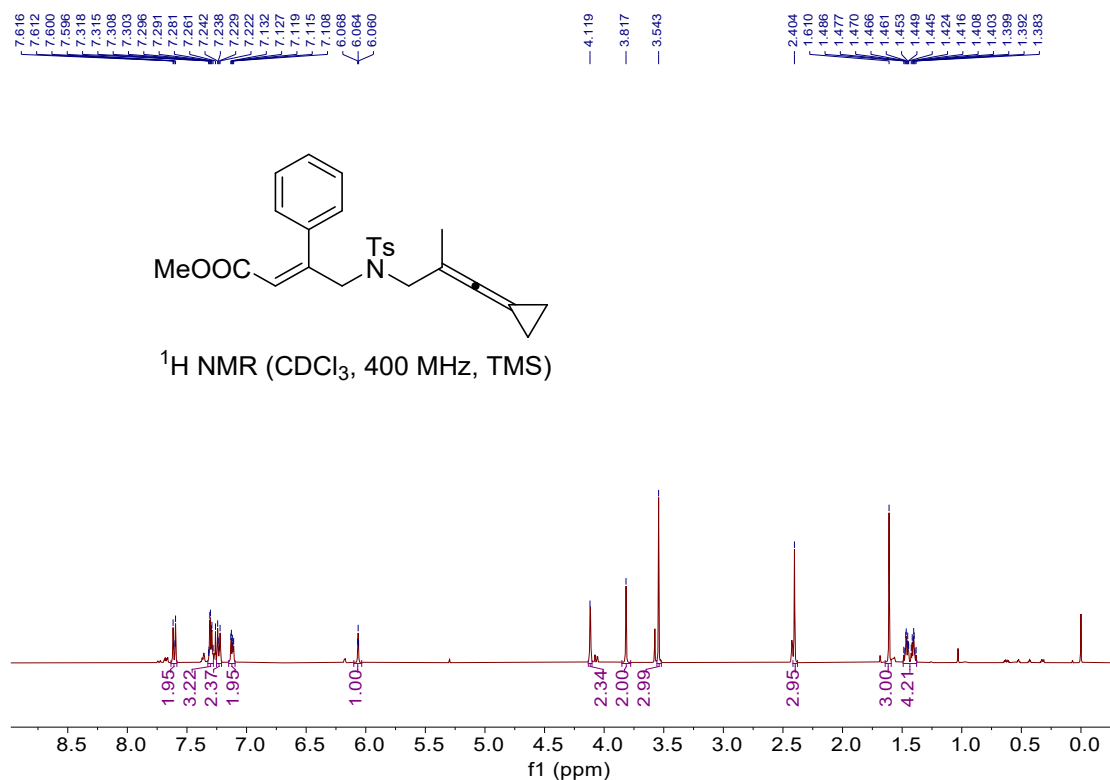

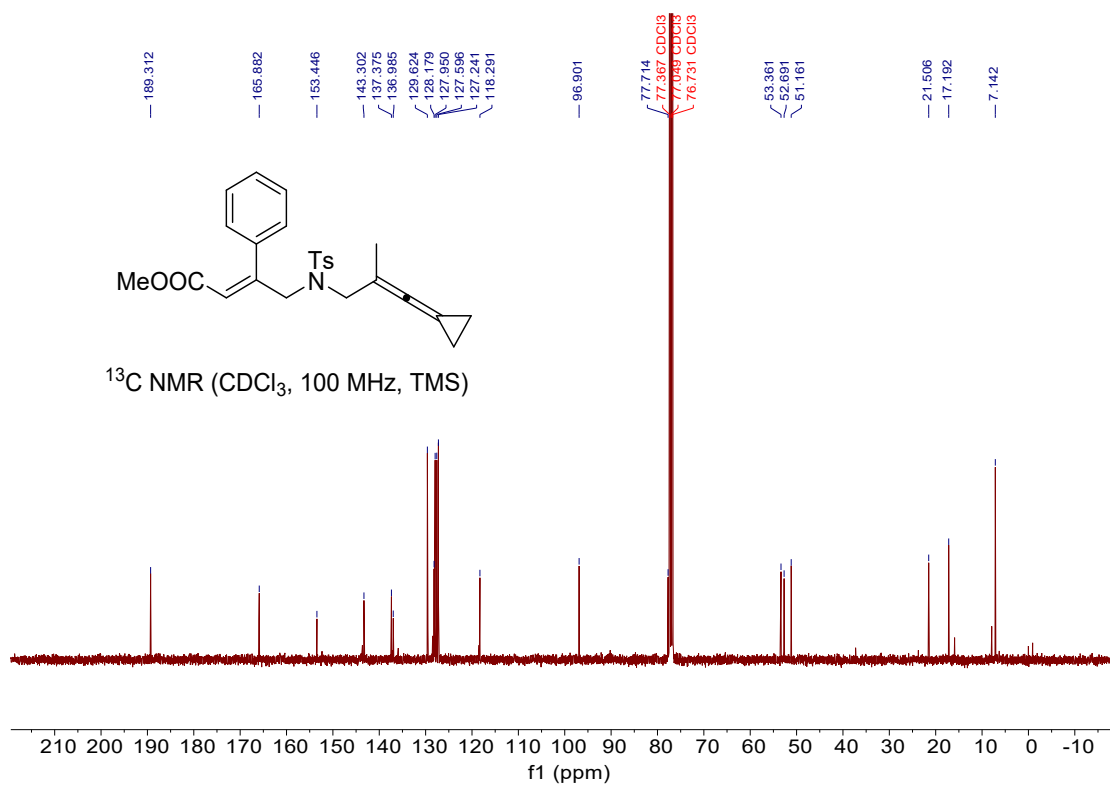

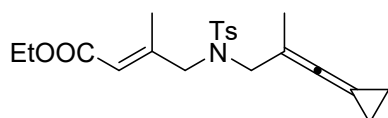

**ethyl (E)-4-((N-(3-cyclopropylidene-2-methylallyl)-4-methylphenyl)sulfonamido)-3-methylbut-2-enoate (1x)**

A colorless oil, 90% yield, 350.4 mg.  $^1\text{H}$  NMR (400 MHz,  $\text{CDCl}_3$ )  $\delta$  7.70 (d,  $J = 8.0$  Hz, 2H), 7.29 (d,  $J = 8.0$  Hz, 2H), 5.75 (h,  $J = 1.2$  Hz, 1H), 4.13 (q,  $J = 7.2$  Hz, 2H), 3.83 – 3.80 (m, 2H), 3.78 (s, 2H), 2.42 (s, 3H), 2.06 (d,  $J = 1.2$  Hz, 3H), 1.62 (s, 3H), 1.44 – 1.39 (m, 2H), 1.38 – 1.33 (m, 2H), 1.27 (t,  $J = 7.2$  Hz, 3H).  $^{13}\text{C}$  NMR (100 MHz,  $\text{CDCl}_3$ )  $\delta$  189.0, 166.2, 153.0, 143.3, 137.2, 129.6, 129.5, 127.7, 127.2, 118.0, 96.8, 77.7, 59.7, 54.4, 52.3, 21.5, 17.2, 16.4, 14.3, 7.0, 6.9. IR (neat)  $\nu$  661, 1042, 1346, 1658, 1721, 2021, 2983  $\text{cm}^{-1}$ . HRMS (ESI) calcd. for  $\text{C}_{21}\text{H}_{27}\text{NO}_4\text{SNa}$  ( $\text{M}+\text{Na}$ ) $^+$ : 412.1553, Found: 412.1556.

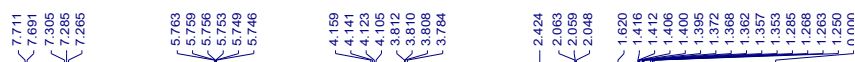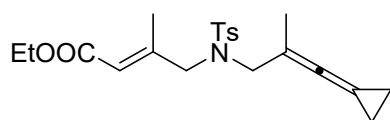

$^1\text{H}$  NMR ( $\text{CDCl}_3$ , 400 MHz, TMS)

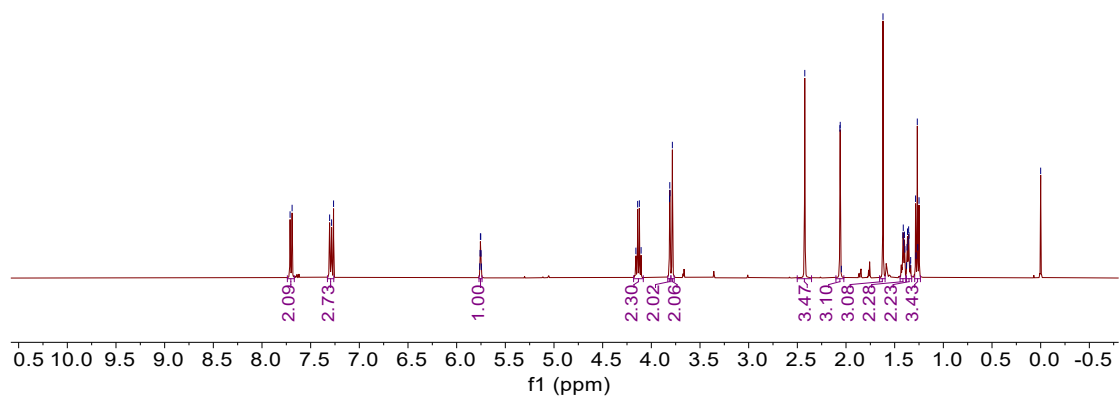



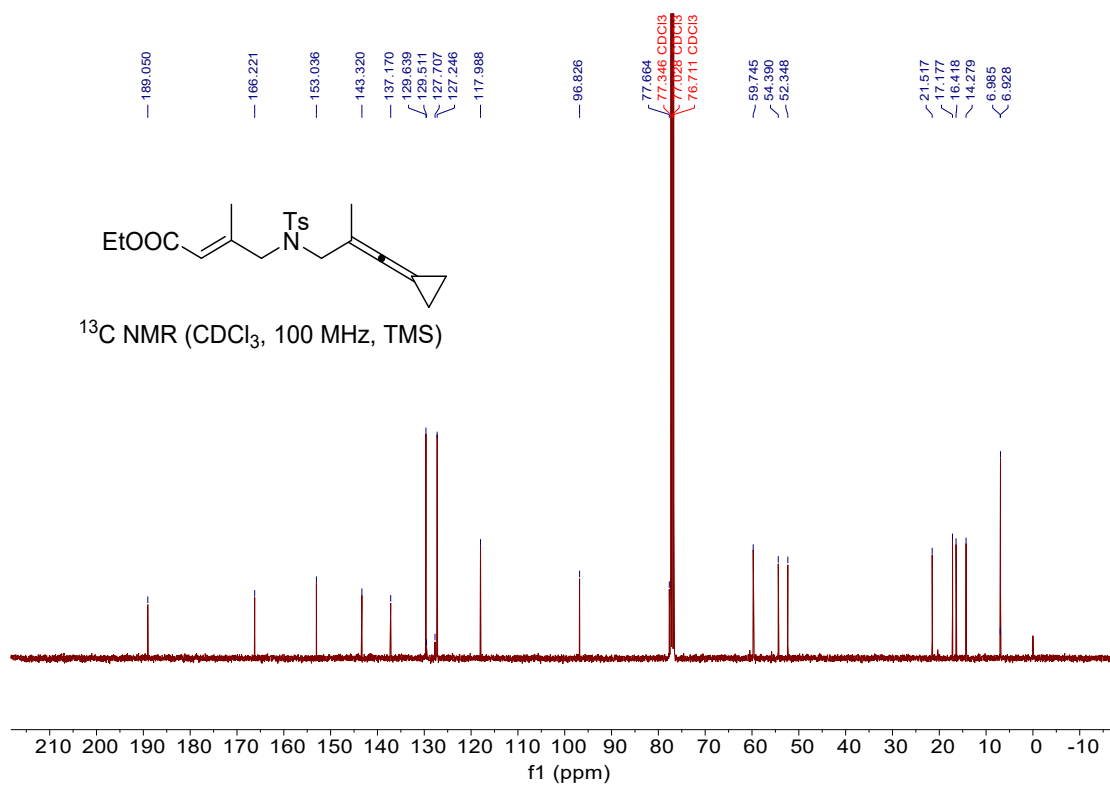

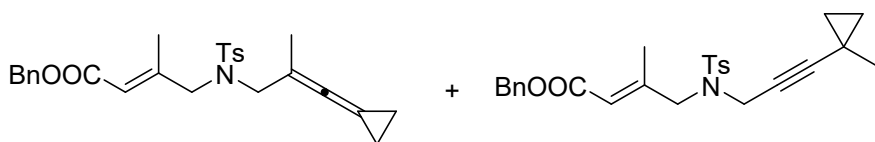

benzyl (E)-4-((N-(3-cyclopropylidene-2-methyl- $\lambda^5$ -allyl)-4-methylphenyl)sulfonamido)-3-methylbut-2-enoate (**1y**) + benzyl (E)-3-methyl-4-((4-methyl-N-(3-(1-methylcyclopropyl)prop-2-yn-1-yl)phenyl)sulfonamido)but-2-enoate (byproduct **1y'**) (**1y**: **1y'**=5:1)

A colorless oil, 90% yield, 405.9 mg.  $^1\text{H}$  NMR (400 MHz,  $\text{CDCl}_3$ )  $\delta$  7.71 – 7.66 (m, 2H), 7.39 – 7.36 (m, 2H), 7.35 – 7.30 (m, 3H), 7.27 (d,  $J = 8.0$  Hz, 2H), 5.80 (q,  $J = 1.2$  Hz, 1H), 5.12 (s, 2H), 3.82 (d,  $J = 1.2$  Hz, 2H), 3.78 (s, 2H), 2.39 (s, 3H), 2.08 (d,  $J = 1.2$  Hz, 3H), 1.62 (s, 3H), 1.39 – 1.34 (m, 2H), 1.33 – 1.28 (m, 2H).  $^{13}\text{C}$  NMR (100 MHz,  $\text{CDCl}_3$ )  $\delta$  189.1, 165.9, 154.0, 143.4, 137.1, 136.1, 129.7, 128.5, 128.2, 127.2, 117.5, 96.8, 77.7, 65.7, 54.4, 52.4, 21.5, 17.2, 16.6, 15.9, 6.9. IR (neat)  $\nu$  660, 1345, 1658, 1722, 2021, 2984  $\text{cm}^{-1}$ . HRMS (ESI) calcd. for  $\text{C}_{26}\text{H}_{29}\text{NO}_4\text{SNa}$  ( $\text{M}+\text{Na}$ ) $^+$ : 474.1710, Found: 474.1707.

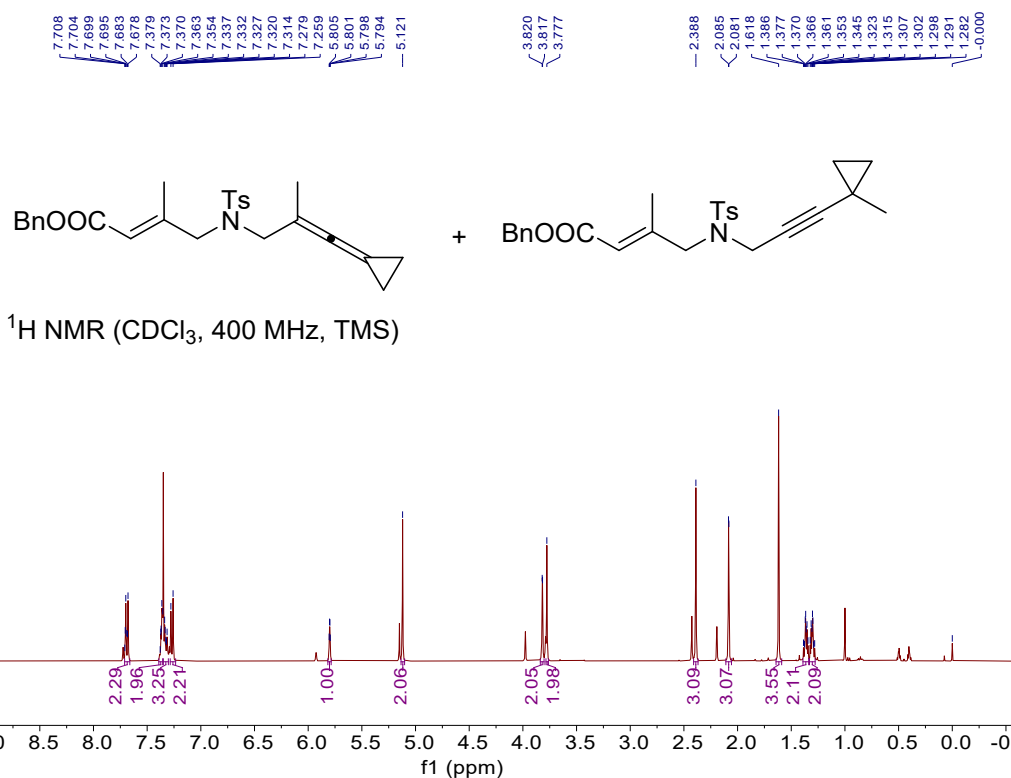

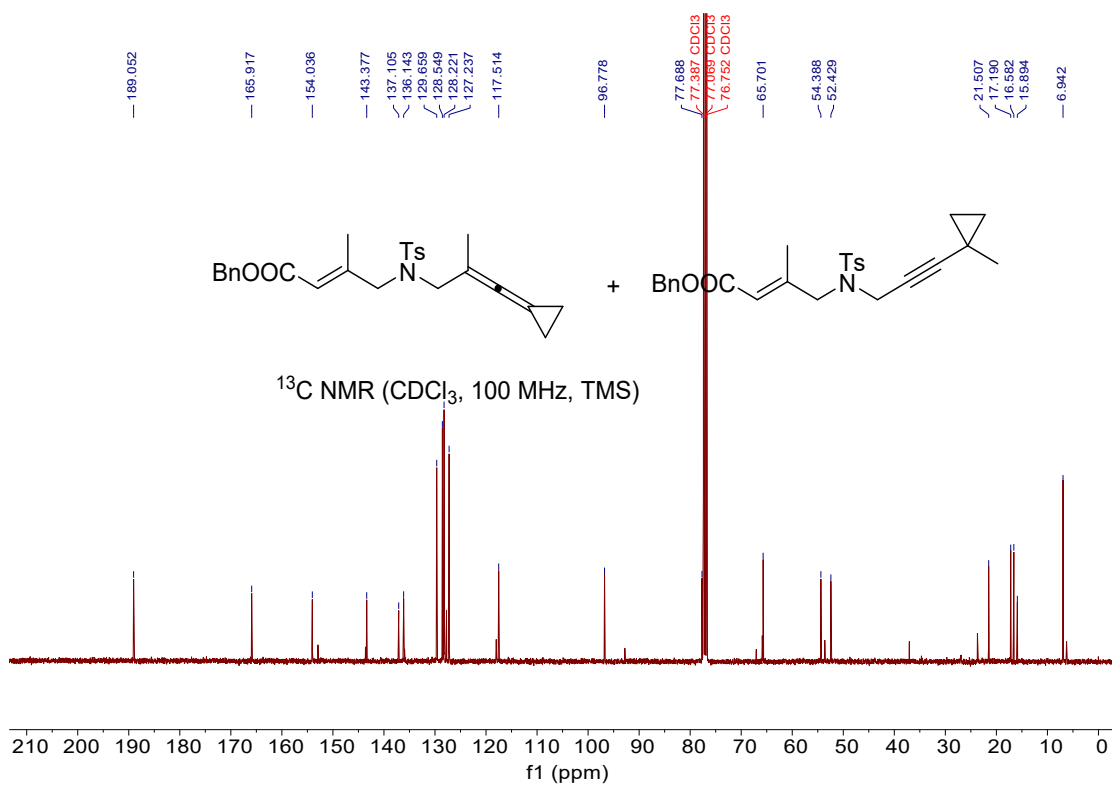

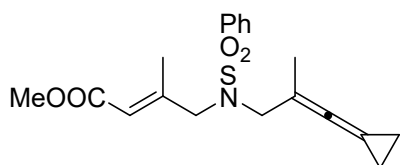

**methyl (E)-4-(N-(3-cyclopropylidene-2-methyl- $\lambda^5$ -allyl)phenylsulfonamido)-3-methylbut-2-enoate (1z)**

A colorless oil, 90% yield, 324.4 mg.  $^1\text{H}$  NMR (400 MHz,  $\text{CDCl}_3$ )  $\delta$  7.86 – 7.77 (m, 2H), 7.66 – 7.48 (m, 3H), 5.78 (s, 1H), 3.84 (s, 2H), 3.80 (s, 2H), 3.68 (d,  $J = 1.2$  Hz, 3H), 2.07 (s, 3H), 1.61 (s, 3H), 1.44 – 1.31 (m, 4H).  $^{13}\text{C}$  NMR (100 MHz,  $\text{CDCl}_3$ )  $\delta$  189.0, 166.6, 153.3, 140.1, 132.6, 129.1, 127.2, 117.6, 96.7, 77.8, 54.4, 52.4, 51.0, 17.1, 16.4, 7.0. IR (neat)  $\nu$  690, 1158, 1356, 1661, 1724, 2023, 2950  $\text{cm}^{-1}$ . HRMS (ESI) calcd. for  $\text{C}_{19}\text{H}_{23}\text{NO}_4\text{SNa}$  ( $\text{M}+\text{Na}$ ) $^+$ : 384.1240, Found: 384.1239.

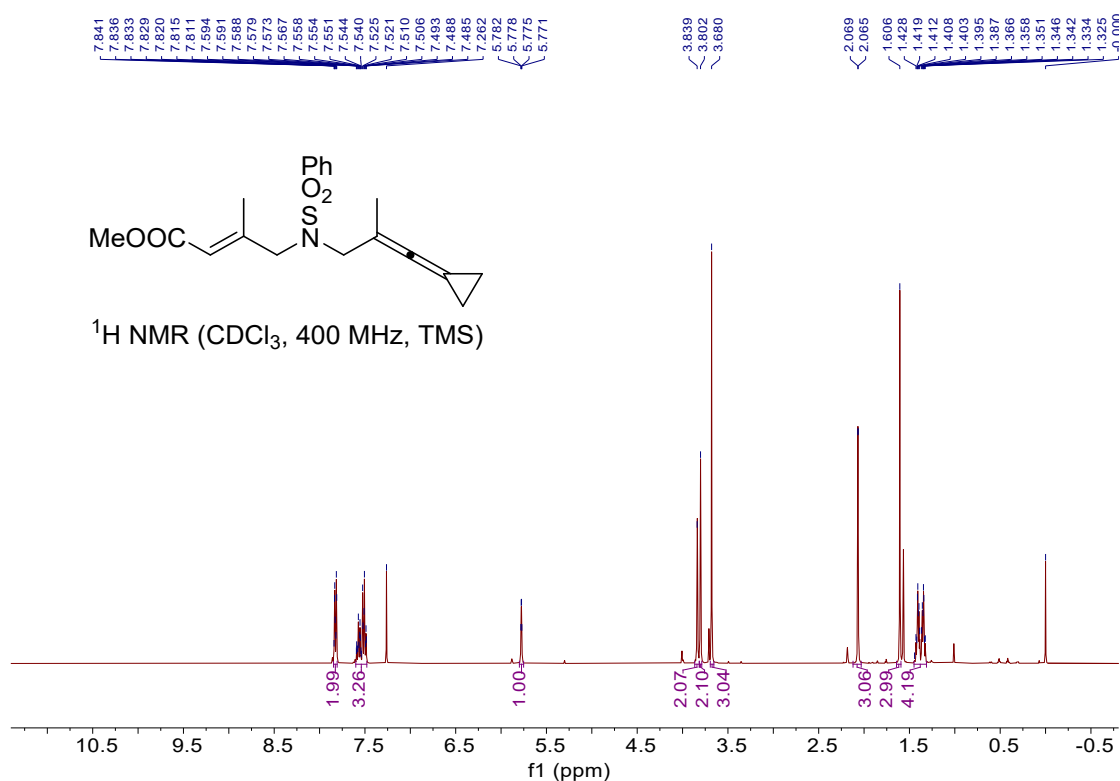

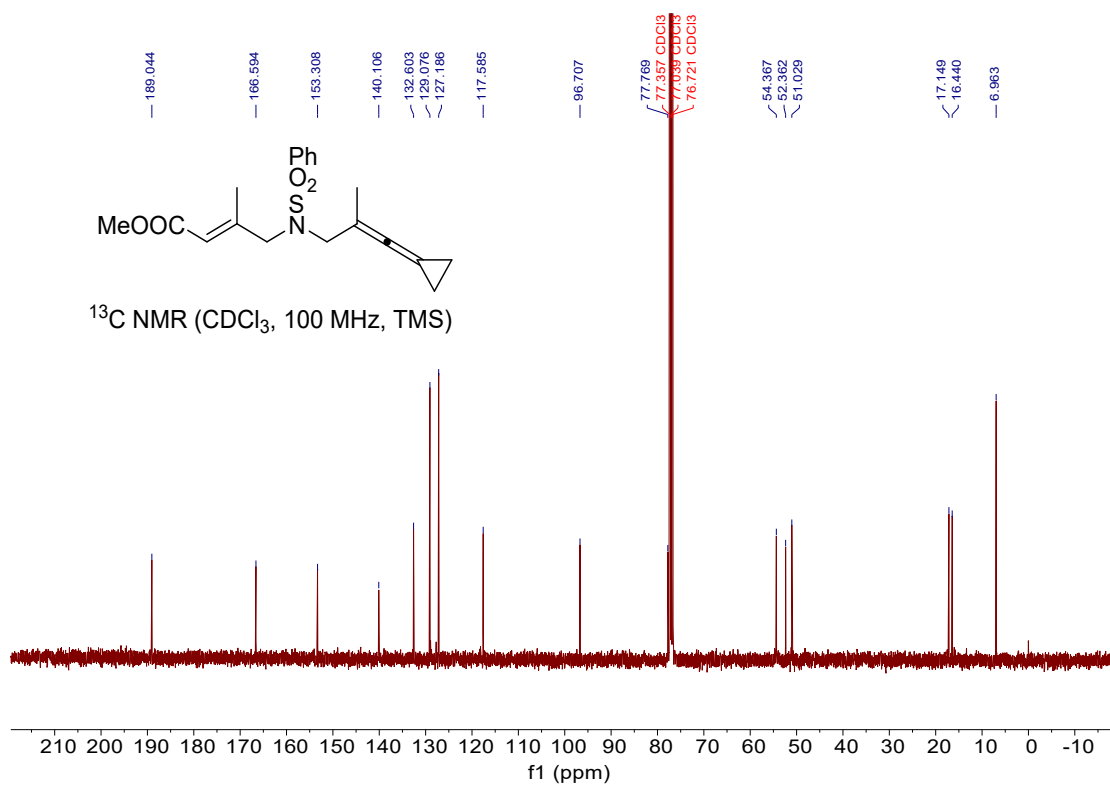

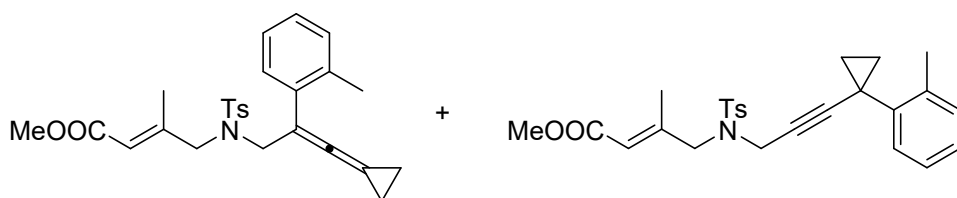

methyl (E)-4-((N-(3-cyclopropylidene-2-(o-tolyl)-λ<sup>5</sup>-allyl)-4-methylphenyl)sulfonamido)-3-methylbut-2-enoate (**1aa**) + methyl (E)-3-methyl-4-((4-methyl-N-(3-(1-(o-tolyl)cyclopropyl)prop-2-yn-1-yl)phenyl)sulfonamido)but-2-enoate (byproduct **1aa'**) (**1m**:**1m'**=**6**:**1**)

A colorless oil, 60% yield, 270.6 mg. <sup>1</sup>H NMR (400 MHz, CDCl<sub>3</sub>) δ 7.58 – 7.53 (m, 2H), 7.19 (d, *J* = 8.0 Hz, 2H), 7.10 (d, *J* = 5.2 Hz, 4H), 5.73 (q, *J* = 1.4 Hz, 1H), 4.24 (s, 2H), 3.84 (d, *J* = 1.4 Hz, 2H), 3.67 (s, 3H), 2.40 (s, 3H), 2.18 (s, 3H), 2.04 (d, *J* = 1.3 Hz, 3H), 1.48 (s, 4H). <sup>13</sup>C NMR (100 MHz, CDCl<sub>3</sub>) δ 190.5, 166.6, 153.2, 143.1, 137.1, 136.2, 135.2, 130.8, 129.5, 127.9, 127.2, 127.2, 126.0, 117.5, 101.5, 78.8, 54.1, 51.0, 50.6, 21.5, 20.5, 16.4, 7.6. IR (neat) ν 662, 1216, 1662, 1720, 2023, 2943 cm<sup>-1</sup>. HRMS (ESI) calcd. for C<sub>26</sub>H<sub>29</sub>NO<sub>4</sub>SNa (M+Na)<sup>+</sup>: 474.1710, Found: 474.1712.

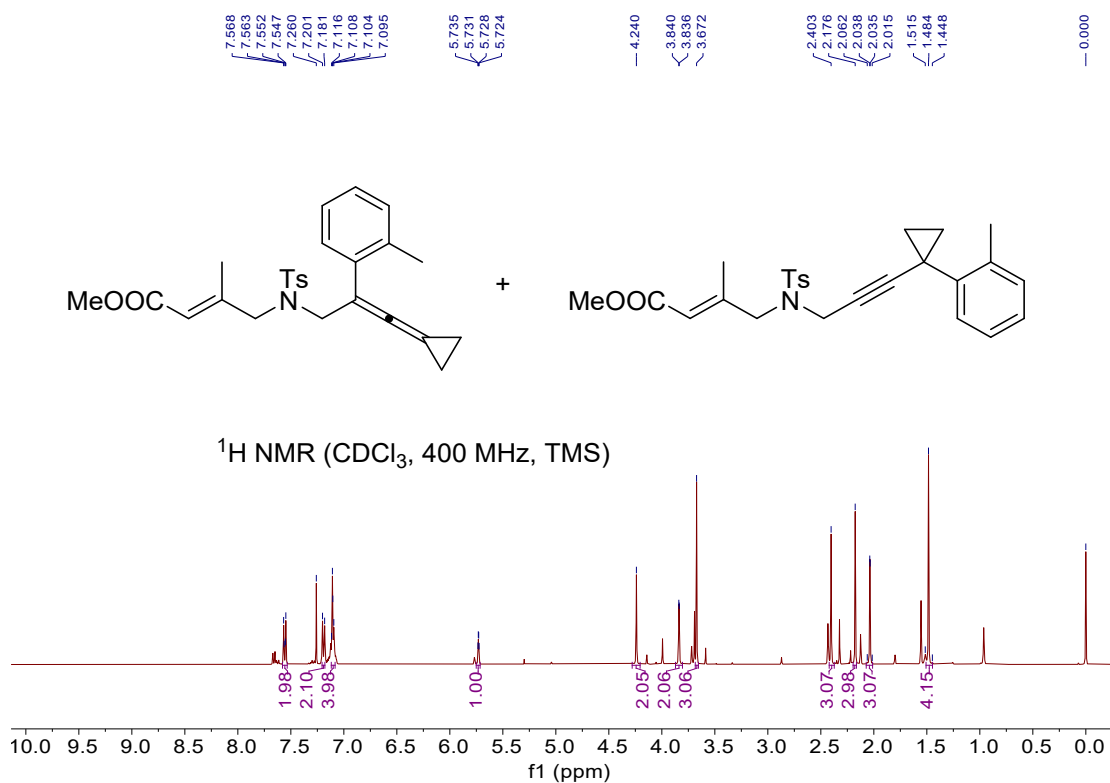

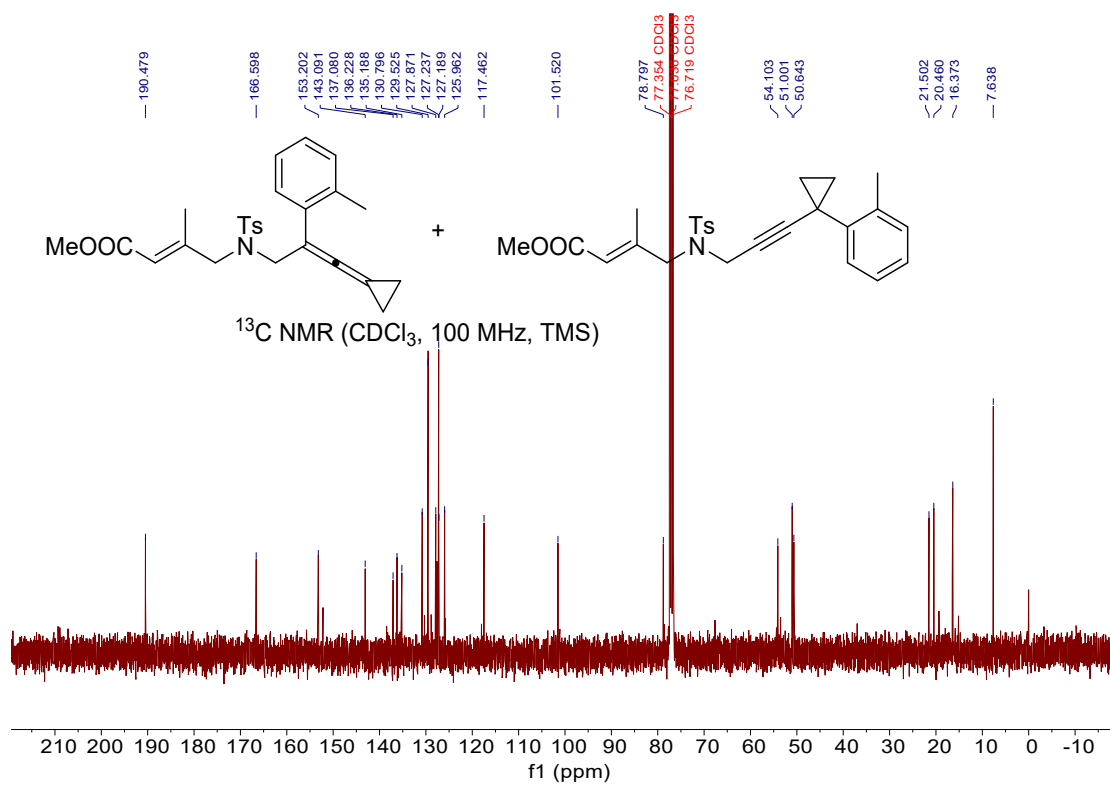

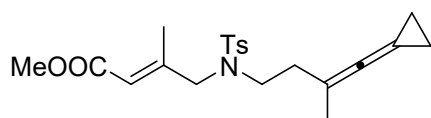

**methyl (E)-4-((N-(4-cyclopropylidene-3-methylbut-3-en-1-yl)-4-methylphenyl)sulfonamido)-3-methylbut-2-enoate (1ab)**

A colorless oil, 90% yield, 350.6 mg.  $^1\text{H}$  NMR (400 MHz,  $\text{CDCl}_3$ )  $\delta$  7.69 (d,  $J = 8.0$  Hz, 2H), 7.30 (d,  $J = 8.0$  Hz, 2H), 5.82 (q,  $J = 1.6$  Hz, 1H), 3.78 (s, 2H), 3.70 (s, 3H), 3.23 – 3.15 (m, 2H), 2.43 (s, 3H), 2.17 – 2.08 (m, 5H), 1.68 (s, 3H), 1.44 – 1.34 (m, 4H).  $^{13}\text{C}$  NMR (101 MHz,  $\text{CDCl}_3$ )  $\delta$  186.7, 166.6, 153.8, 143.5, 136.6, 129.7, 127.2, 117.2, 99.2, 78.0, 77.4, 77.0, 76.7, 55.7, 51.1, 47.1, 32.9, 21.5, 19.8, 16.5, 6.7. IR (neat)  $\nu$  665, 1226, 1661, 1721, 2024, 2923  $\text{cm}^{-1}$ . HRMS (ESI) calcd. for  $\text{C}_{21}\text{H}_{27}\text{NO}_4\text{SNa}$  ( $\text{M}+\text{Na}$ ) $^+$ : 412.1553, Found: 412.1560.

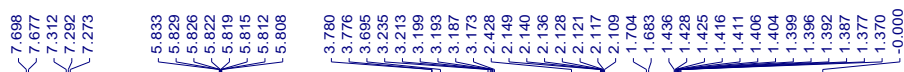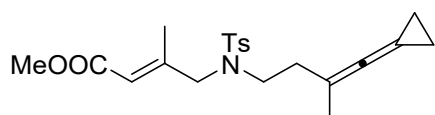

$^1\text{H}$  NMR ( $\text{CDCl}_3$ , 400 MHz, TMS)

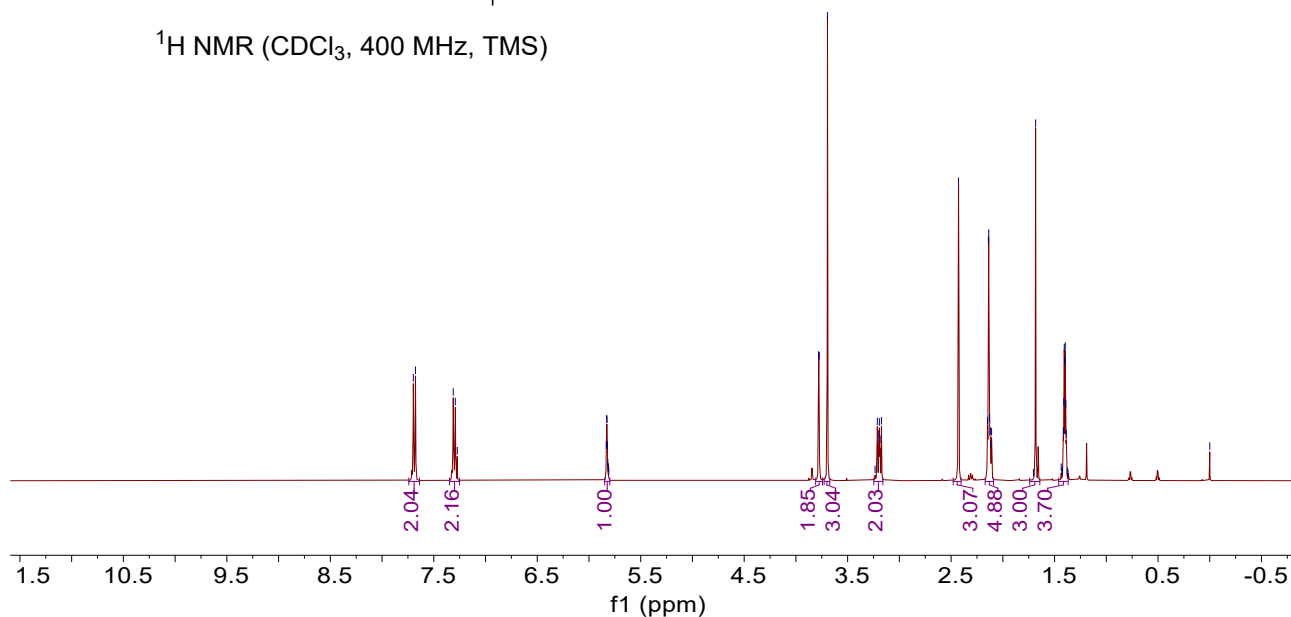



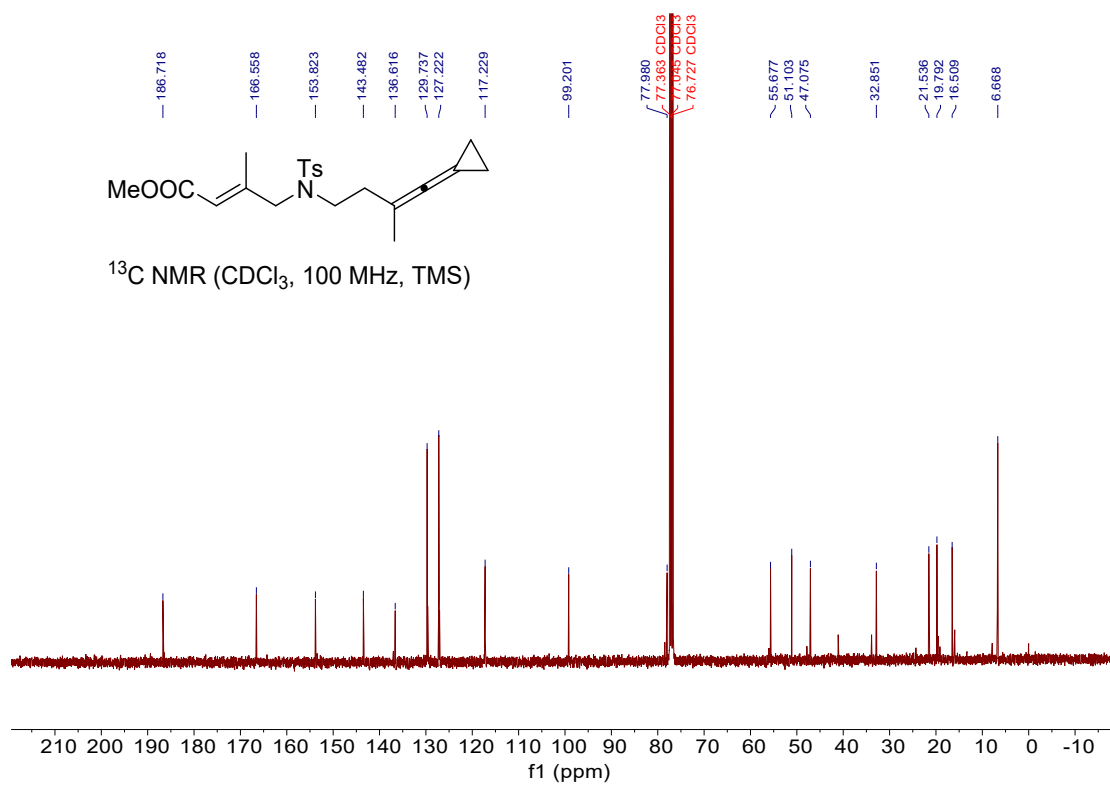

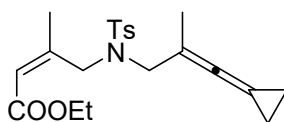

**ethyl (Z)-4-((N-(3-cyclopropylidene-2-methylallyl)-4-methylphenyl)sulfonamido)-3-methylbut-2-enoate (3a)**

A colorless oil, 90% yield, 350.4 mg.  $^1\text{H}$  NMR (400 MHz,  $\text{CDCl}_3$ )  $\delta$  7.70 (d,  $J = 8.0$  Hz, 2H), 7.29 (d,  $J = 8.0$  Hz, 2H), 5.78 (h,  $J = 1.2$  Hz, 1H), 4.43 (d,  $J = 1.2$  Hz, 2H), 4.10 (q,  $J = 7.2$  Hz, 2H), 3.71 (s, 2H), 2.42 (s, 3H), 2.02 (d,  $J = 1.2$  Hz, 3H), 1.70 (s, 3H), 1.41 – 1.31 (m, 4H), 1.25 (t,  $J = 7.2$  Hz, 3H).  $^{13}\text{C}$  NMR (100 MHz,  $\text{CDCl}_3$ )  $\delta$  188.9, 166.0, 156.2, 143.3, 136.1, 129.6, 127.4, 118.4, 97.4, 77.4, 59.8, 54.3, 49.1, 22.6, 21.5, 17.3, 14.2, 6.8. IR (neat)  $\nu$  660, 1221, 1446, 1651, 1711, 2024, 2983  $\text{cm}^{-1}$ . HRMS (ESI) calcd. for  $\text{C}_{21}\text{H}_{27}\text{NO}_4\text{SNa}$  ( $\text{M}+\text{Na}$ ) $^+$ : 412.1553, Found: 412.1553.

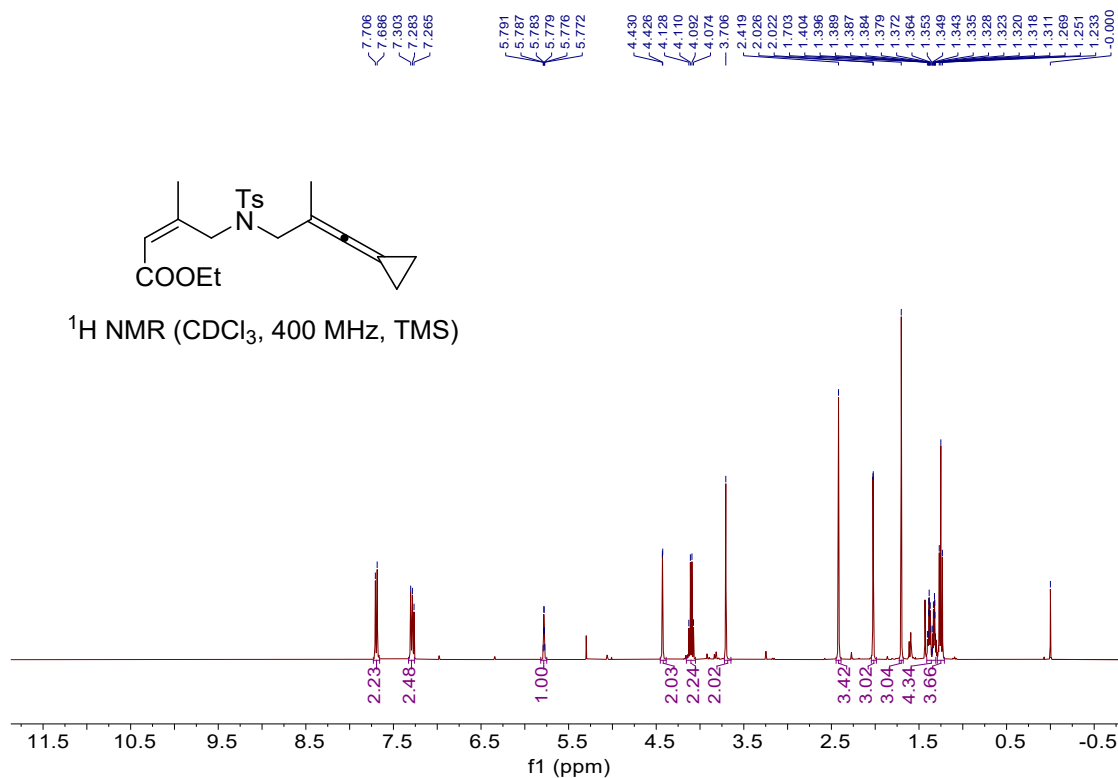

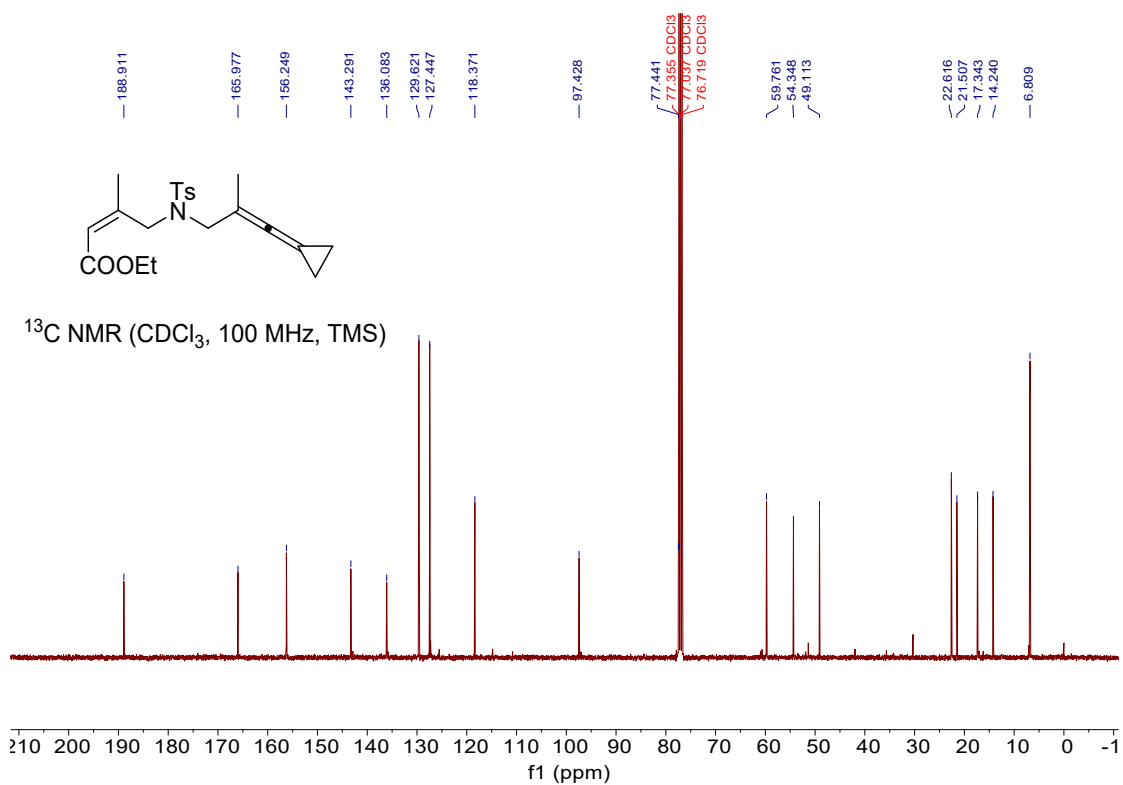

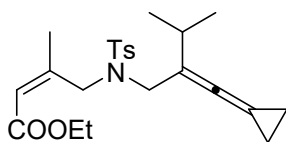

**ethyl (Z)-4-((N-(2-(cyclopropylidene- $\lambda^5$ -methylene)-3-methylbutyl)-4-methylphenyl)sulfonamido)-3-methylbut-2-enoate (3b)**

A colorless oil, 80% yield, 333.4 mg.  $^1\text{H}$  NMR (400 MHz,  $\text{CDCl}_3$ )  $\delta$  7.69 (d,  $J = 8.0$  Hz, 2H), 7.29 (d,  $J = 8.0$  Hz, 2H), 5.77 (h,  $J = 1.6$  Hz, 1H), 4.41 (s, 2H), 4.10 (q,  $J = 7.2$  Hz, 2H), 3.76 (s, 2H), 2.42 (s, 3H), 2.26 (hept,  $J = 6.8$  Hz, 1H), 2.01 (d,  $J = 1.6$  Hz, 3H), 1.41 – 1.31 (m, 4H), 1.25 (t,  $J = 7.2$  Hz, 3H), 0.98 (d,  $J = 6.8$  Hz, 6H).  $^{13}\text{C}$  NMR (100 MHz,  $\text{CDCl}_3$ )  $\delta$  187.6, 166.0, 156.7, 143.2, 136.0, 129.6, 127.5, 118.1, 108.8, 79.8, 59.7, 51.9, 49.2, 28.6, 22.6, 21.5, 21.5, 14.3, 7.0. IR (neat)  $\nu$  665, 1343, 1647, 1711, 2020, 2982  $\text{cm}^{-1}$ . HRMS (ESI) calcd. for  $\text{C}_{23}\text{H}_{31}\text{NO}_4\text{SNa}$  ( $\text{M}+\text{Na}$ ) $^+$ : 440.1866, Found: 440.1869.

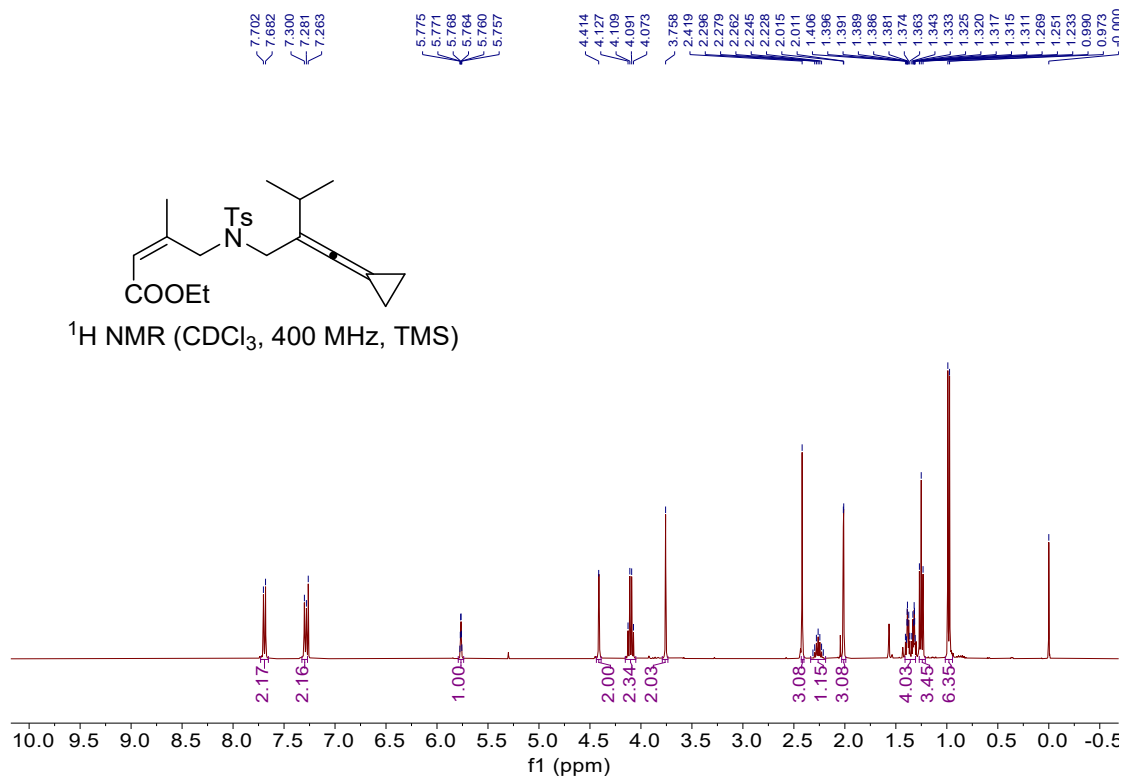

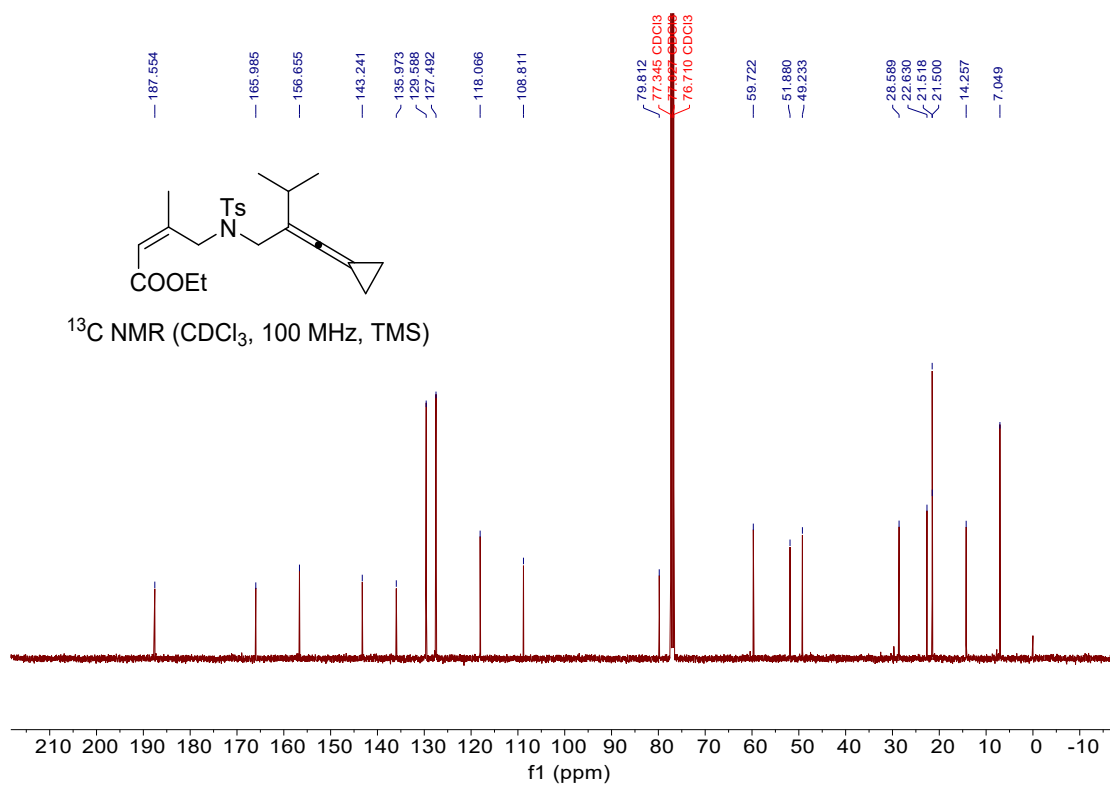

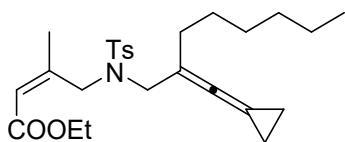

**ethyl (Z)-4-((N-(2-(cyclopropylidene- $\lambda^5$ -methylene)octyl)-4-methylphenyl)sulfonamido)-3-methylbut-2-enoate (3c)**

A colorless oil, 90% yield, 413 mg.  $^1\text{H}$  NMR (400 MHz,  $\text{CDCl}_3$ )  $\delta$  7.69 (d,  $J = 8.0$  Hz, 2H), 7.29 (d,  $J = 8.0$  Hz, 2H), 5.77 (q,  $J = 1.6$  Hz, 1H), 4.43 (s, 2H), 4.10 (q,  $J = 7.2$  Hz, 2H), 3.71 (s, 2H), 2.42 (s, 3H), 2.02 (d,  $J = 1.6$  Hz, 3H), 1.96 – 1.91 (m, 2H), 1.36 – 1.21 (m, 15H), 0.88 (d,  $J = 6.8$  Hz, 3H).  $^{13}\text{C}$  NMR (100 MHz,  $\text{CDCl}_3$ )  $\delta$  188.6, 166.0, 156.6, 143.2, 136.1, 129.6, 127.5, 118.2, 102.5, 78.7, 59.7, 53.4, 49.1, 31.7, 30.5, 29.0, 27.6, 22.7, 21.5, 14.2, 14.1, 6.9. IR (neat)  $\nu$  660, 1216, 1376, 1649, 1712, 2024, 2925  $\text{cm}^{-1}$ . HRMS (ESI) calcd. for  $\text{C}_{26}\text{H}_{37}\text{NO}_4\text{SNa}$  ( $\text{M}+\text{Na}$ ) $^+$ : 482.2336, Found: 482.2328.

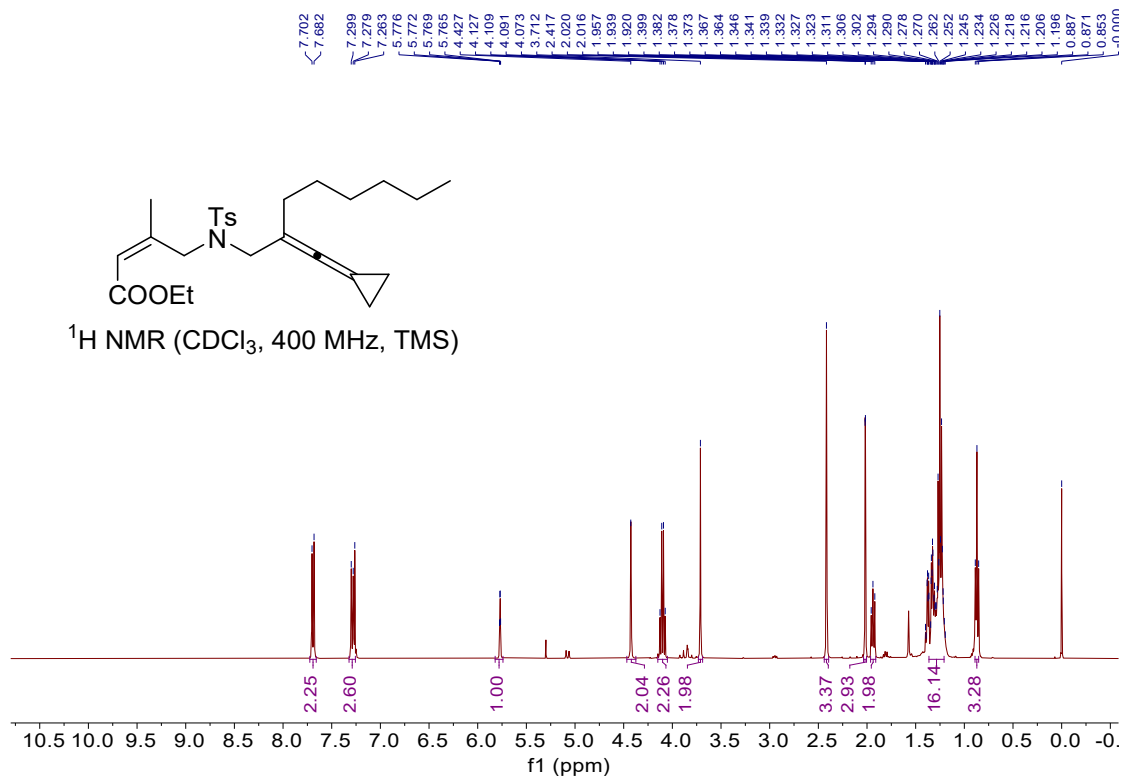

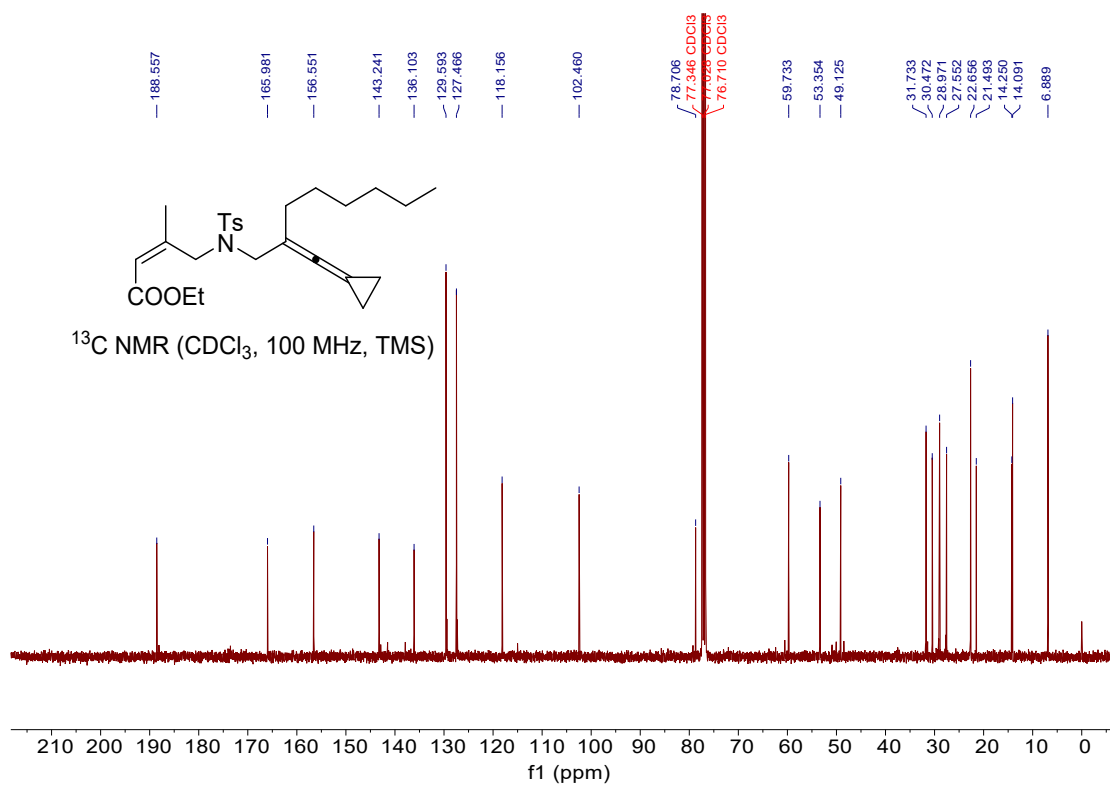

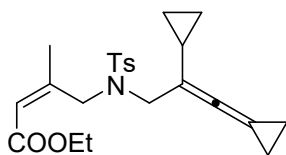

**ethyl (Z)-4-((N-(2-(cyclopropylidene- $\lambda^5$ -methylene)octyl)-4-methylphenyl)sulfonamido)-3-methylbut-2-enoate (3d)**

A colorless oil, 80% yield, 332.4 mg.  $^1\text{H}$  NMR (400 MHz,  $\text{CDCl}_3$ )  $\delta$  7.71 (d,  $J = 8.0$  Hz, 2H), 7.29 (d,  $J = 8.0$  Hz, 2H), 5.78 (h,  $J = 1.6$  Hz, 1H), 4.46 (s, 2H), 4.10 (q,  $J = 7.2$  Hz, 2H), 3.83 (s, 2H), 2.41 (s, 3H), 2.07 (d,  $J = 1.6$  Hz, 3H), 1.42 – 1.30 (m, 4H), 1.25 (t,  $J = 7.2$  Hz, 3H), 1.22 – 1.13 (m, 1H), 0.69 – 0.58 (m, 2H), 0.35 – 0.27 (m, 2H).  $^{13}\text{C}$  NMR (100 MHz,  $\text{CDCl}_3$ )  $\delta$  186.4, 166.0, 156.7, 143.2, 136.1, 129.6, 127.5, 118.1, 105.8, 80.5, 59.7, 53.4, 49.1, 22.7, 21.5, 14.3, 11.0, 7.6, 7.1. IR (neat)  $\nu$  661, 1348, 1659, 1711, 2024, 2948  $\text{cm}^{-1}$ . HRMS (ESI) calcd. for  $\text{C}_{23}\text{H}_{29}\text{NO}_4\text{SNa}$  ( $\text{M}+\text{Na}$ ) $^+$ : 438.1710, Found: 438.1705.

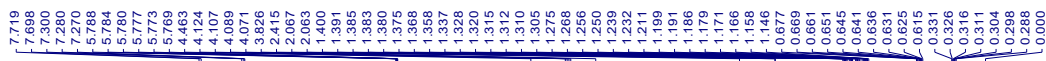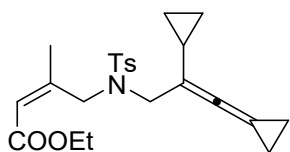

$^1\text{H}$  NMR ( $\text{CDCl}_3$ , 400 MHz, TMS)

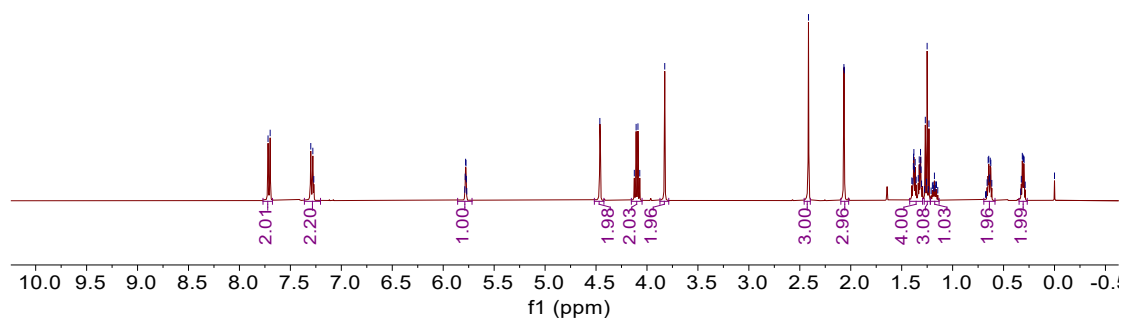



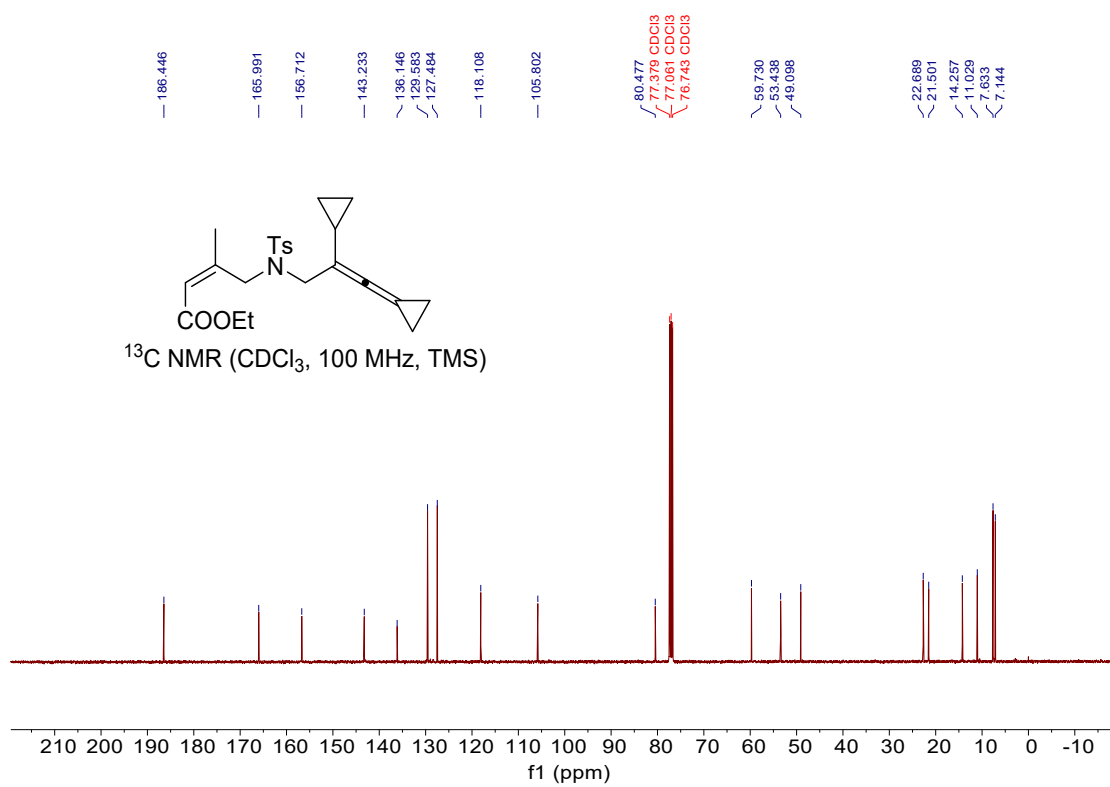

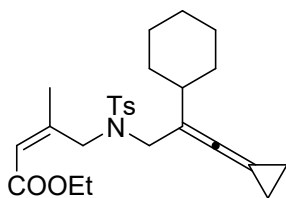

**ethyl (Z)-4-((N-(2-cyclohexyl-3-cyclopropylidene- $\lambda^5$ -allyl)-4-methylphenyl)sulfonamido)-3-methylbut-2-enoate (3e)**

A colorless oil, 90% yield, 365.4 mg.  $^1\text{H}$  NMR (400 MHz,  $\text{CDCl}_3$ )  $\delta$  7.69 (d,  $J = 8.0$  Hz, 2H), 7.29 (d,  $J = 8.0$  Hz, 2H), 5.77 (q,  $J = 1.6$  Hz, 1H), 4.43 (d,  $J = 1.6$  Hz, 2H), 4.10 (q,  $J = 7.2$  Hz, 2H), 3.75 (s, 2H), 2.42 (s, 3H), 2.02 (d,  $J = 1.6$  Hz, 3H), 1.83 – 1.62 (m, 7H), 1.39 – 1.30 (m, 4H), 1.29 – 1.24 (m, 3H), 1.16 – 0.95 (m, 4H).  $^{13}\text{C}$  NMR (100 MHz,  $\text{CDCl}_3$ )  $\delta$  188.1, 166.0, 156.7, 143.2, 136.2, 129.6, 127.5, 118.1, 107.8, 107.7, 79.4, 59.7, 51.5, 49.0, 38.1, 32.1, 26.4, 22.6, 21.5, 14.3, 14.2, 7.1. IR (neat)  $\nu$  661, 1343, 1648, 1713, 2025, 2983  $\text{cm}^{-1}$ . HRMS (ESI) calcd. for  $\text{C}_{26}\text{H}_{35}\text{NO}_4\text{SNa}$  ( $\text{M}+\text{Na}$ ) $^+$ : 480.2179, Found: 480.2178.

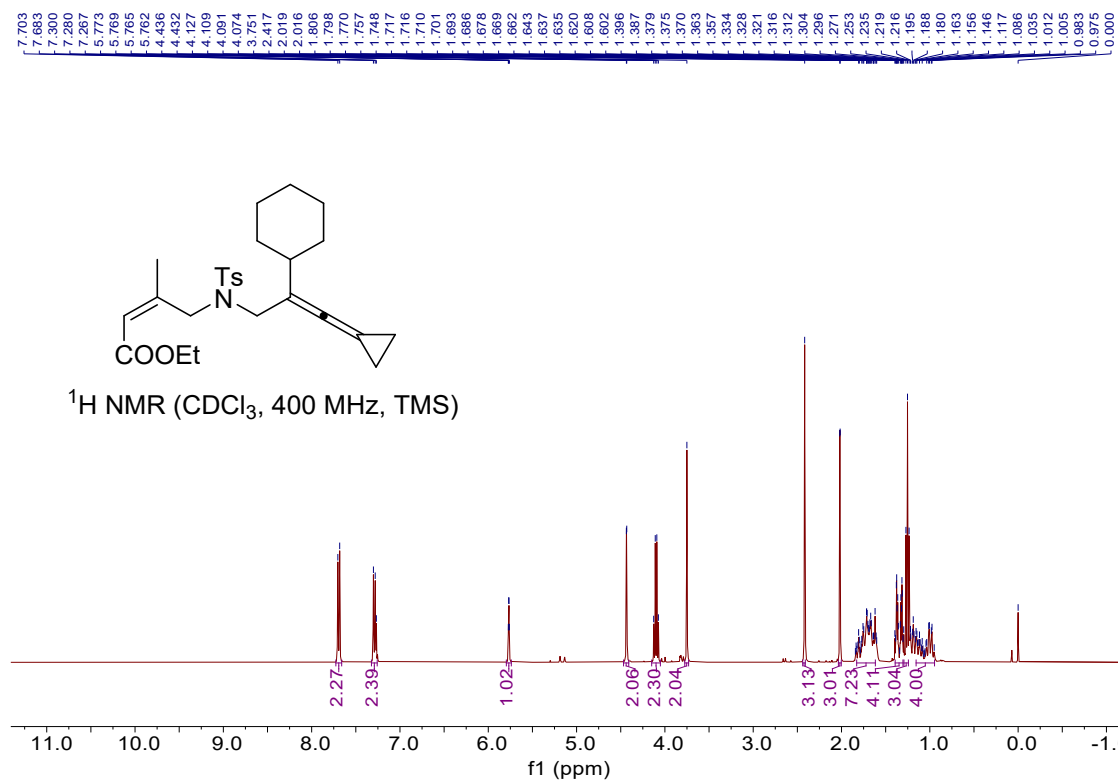

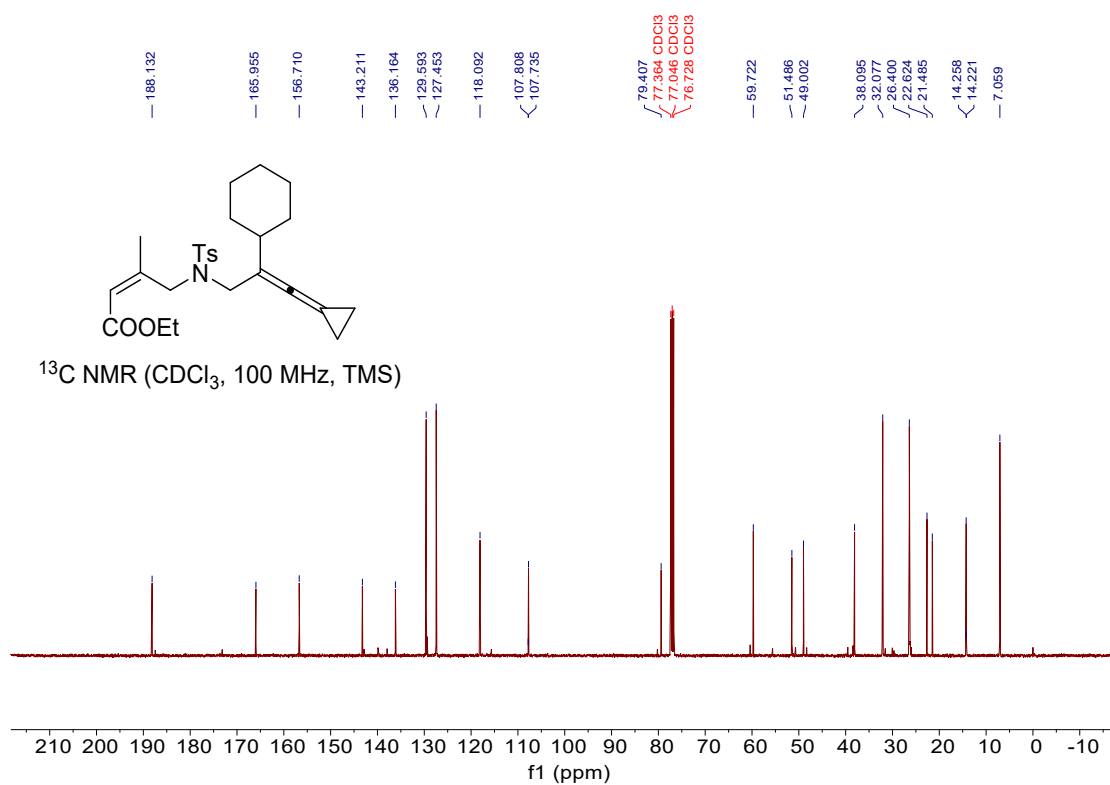

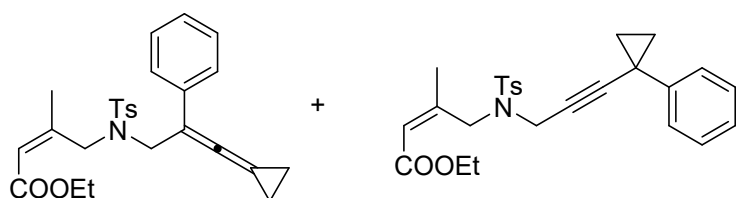

ethyl (Z)-4-((N-(3-cyclopropylidene-2-phenyl- $\lambda^5$ -allyl)-4-methylphenyl)sulfonamido)-3-methylbut-2-enoate (3f) + ethyl (Z)-3-methyl-4-((4-methyl-N-(3-(1-phenylcyclopropyl)prop-2-yn-1-yl)phenyl)sulfonamido)but-2-enoate (byproduct 3f') (1m: 1m'=3:1)

A colorless oil, 60% yield, 284.4 mg.  $^1\text{H}$  NMR (400 MHz,  $\text{CDCl}_3$ )  $\delta$  7.74 – 7.66 (m, 2H), 7.52 – 7.42 (m, 2H), 7.32 (dd,  $J = 7.8, 2.0$  Hz, 4H), 7.22 – 7.18 (m, 1H), 5.71 – 5.58 (m, 1H), 4.41 (d,  $J = 1.6$  Hz, 2H), 4.18 (s, 2H), 4.09 (q,  $J = 7.2$  Hz, 2H), 2.43 (s, 3H), 1.70 – 1.57 (m, 5H), 1.56 – 1.49 (m, 2H), 1.25 (t,  $J = 7.2$  Hz, 3H).  $^{13}\text{C}$  NMR (100 MHz,  $\text{CDCl}_3$ )  $\delta$  191.0, 165.7, 154.2, 143.5, 141.3, 135.9, 129.6, 128.2, 127.7, 126.0, 125.4, 119.8, 89.9, 70.3, 59.9, 47.5, 38.1, 22.3, 21.5, 19.8, 15.4, 14.2, 8.6. IR (neat)  $\nu$  660, 1043, 1343, 1651, 1712, 2024, 2949  $\text{cm}^{-1}$ . HRMS (ESI) calcd. for  $\text{C}_{26}\text{H}_{29}\text{NO}_4\text{SNa}$  ( $\text{M}+\text{Na}$ ) $^+$ : 474.1710, Found: 474.1716.

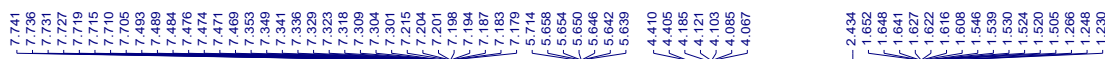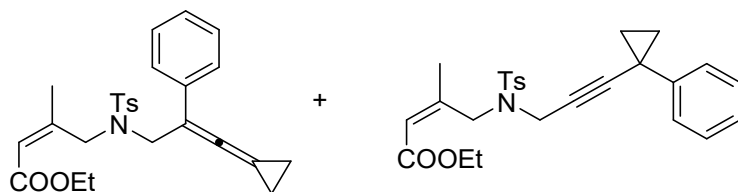

$^1\text{H}$  NMR ( $\text{CDCl}_3$ , 400 MHz, TMS)

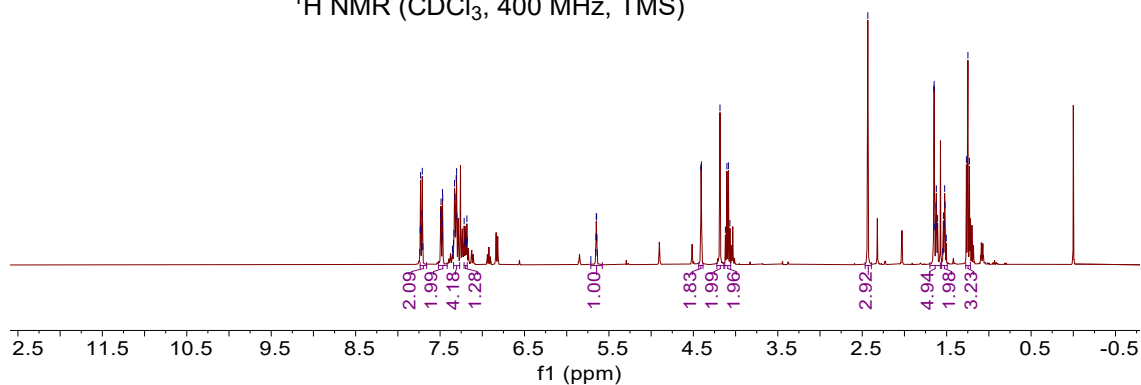

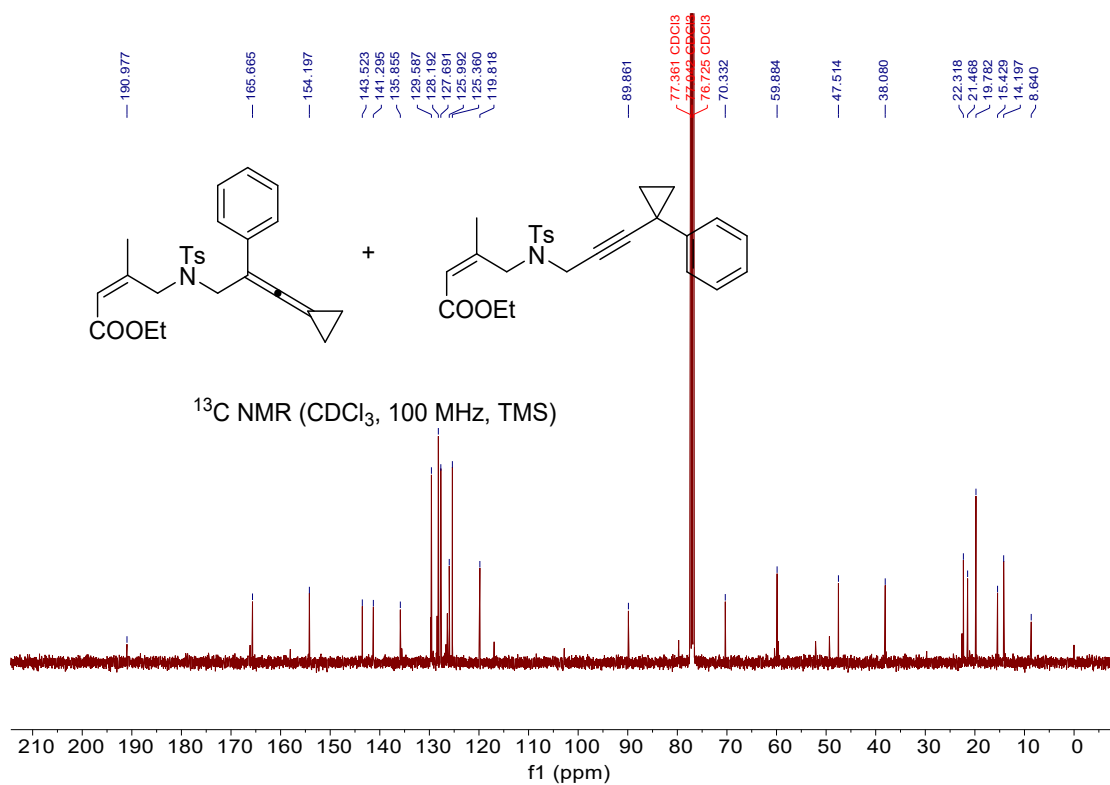

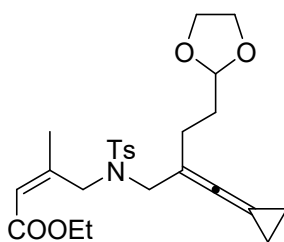

**ethyl (Z)-4-((N-(2-(cyclopropylidene- $\lambda^5$ -methylene)-4-(1,3-dioxolan-2-yl)butyl)-4-methylphenyl)sulfonamido)-3-methylbut-2-enoate (3g)**

A yellow oil, 80% yield, 380.4 mg.  $^1\text{H}$  NMR (400 MHz,  $\text{CDCl}_3$ )  $\delta$  7.69 (d,  $J = 8.0$  Hz, 2H), 7.29 (d,  $J = 8.0$  Hz, 2H), 5.77 (q,  $J = 1.6$  Hz, 1H), 4.86 – 4.83 (m, 1H), 4.41 (d,  $J = 1.6$  Hz, 2H), 4.09 (q,  $J = 7.2$  Hz, 2H), 3.97 – 3.94 (m, 2H), 3.86 – 3.83 (m, 2H), 3.72 (s, 2H), 2.42 (s, 3H), 2.15 – 2.08 (m, 2H), 2.02 (d,  $J = 1.6$  Hz, 3H), 1.69 (dt,  $J = 8.0, 2.4$  Hz, 2H), 1.41 – 1.30 (m, 4H), 1.25 (t,  $J = 7.2$  Hz, 3H).  $^{13}\text{C}$  NMR (100 MHz,  $\text{CDCl}_3$ )  $\delta$  188.2, 166.0, 156.4, 143.3, 136.0, 129.6, 127.5, 118.3, 104.5, 104.0, 101.9, 79.7, 64.9, 64.8, 59.7, 53.4, 49.3, 33.8, 31.9, 24.9, 24.0, 22.6, 21.5, 14.2, 7.0. IR (neat)  $\nu$  661, 1043, 1221, 1651, 1712, 2024, 2949  $\text{cm}^{-1}$ . HRMS (ESI) calcd. for  $\text{C}_{25}\text{H}_{33}\text{NO}_4\text{SNa}$  ( $\text{M}+\text{Na}$ ) $^+$ : 498.1921, Found: 498.1920.

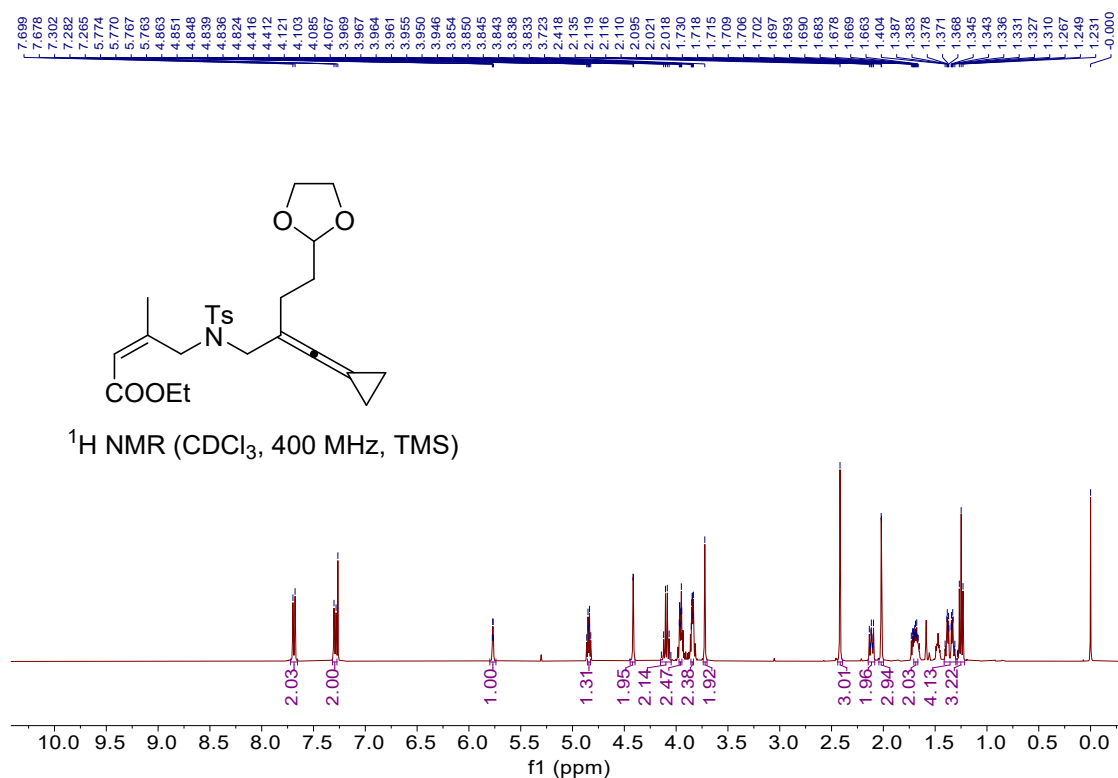

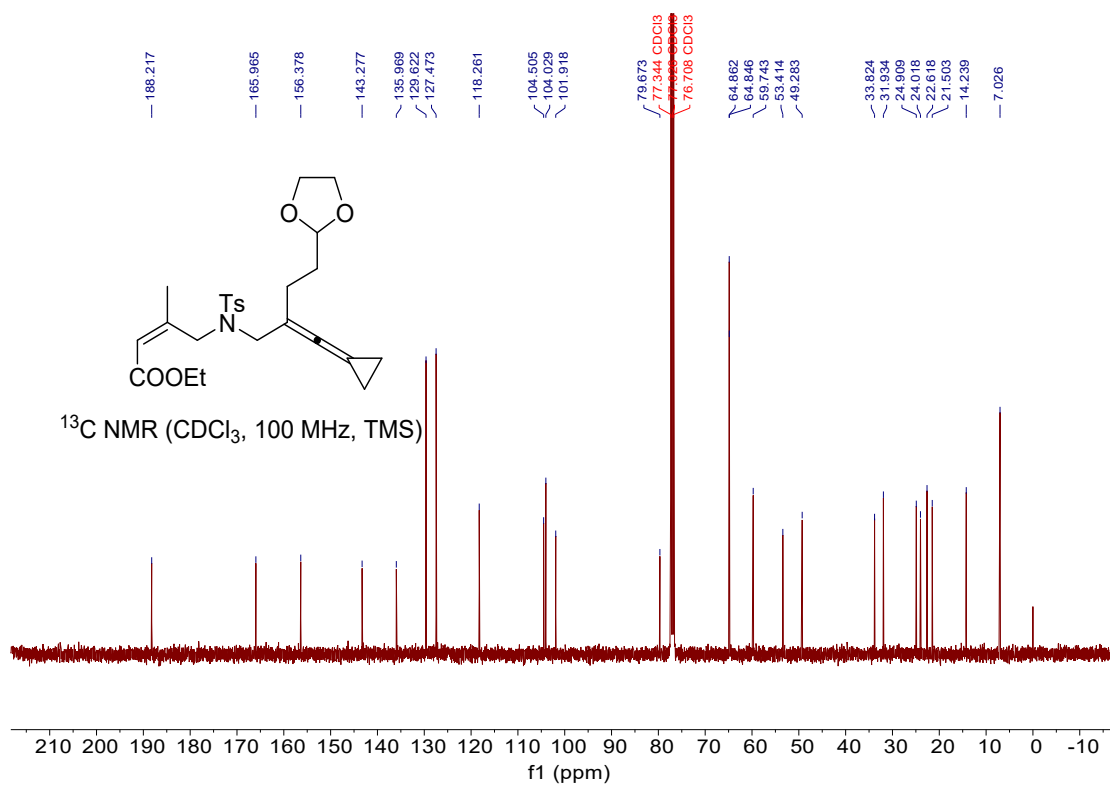

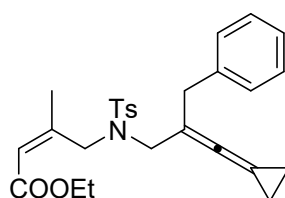

**ethyl (Z)-4-((N-(2-benzyl-3-cyclopropylidene- $\lambda^5$ -allyl)-4-methylphenyl)sulfonamido)-3-methylbut-2-enoate (3h)**

A colorless oil, 90% yield, 418.4 mg.  $^1\text{H}$  NMR (400 MHz,  $\text{CDCl}_3$ )  $\delta$  7.69 – 7.61 (m, 2H), 7.32 – 7.14 (m, 8H), 5.80 – 5.74 (m, 1H), 4.45 (d,  $J = 1.6$  Hz, 2H), 4.13 – 4.06 (m, 2H), 3.68 (s, 2H), 3.35 (s, 2H), 2.41 (s, 3H), 2.06 (d,  $J = 1.4$  Hz, 3H), 1.31 (q,  $J = 1.6$  Hz, 4H), 1.25 (td,  $J = 7.2, 2.4$  Hz, 3H).  $^{13}\text{C}$  NMR (100 MHz,  $\text{CDCl}_3$ )  $\delta$  189.7, 166.0, 156.4, 143.3, 139.3, 135.8, 129.6, 129.1, 128.1, 127.5, 126.1, 118.2, 101.7, 78.9, 59.7, 52.6, 49.5, 37.5, 22.7, 21.5, 14.3, 7.1. IR (neat)  $\nu$  662, 1116, 1446, 1649, 1710, 2018, 2924  $\text{cm}^{-1}$ . HRMS (ESI) calcd. for  $\text{C}_{27}\text{H}_{31}\text{NO}_4\text{SNa}$  ( $\text{M}+\text{Na}$ ) $^+$ : 488.1866, Found: 488.1861.

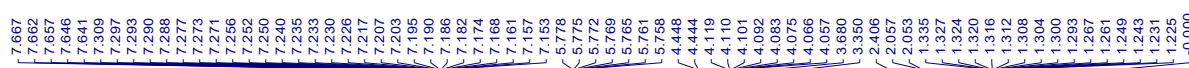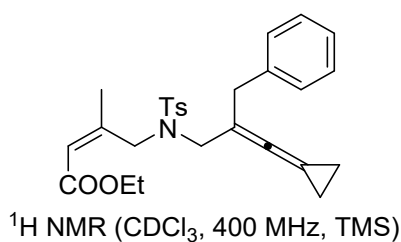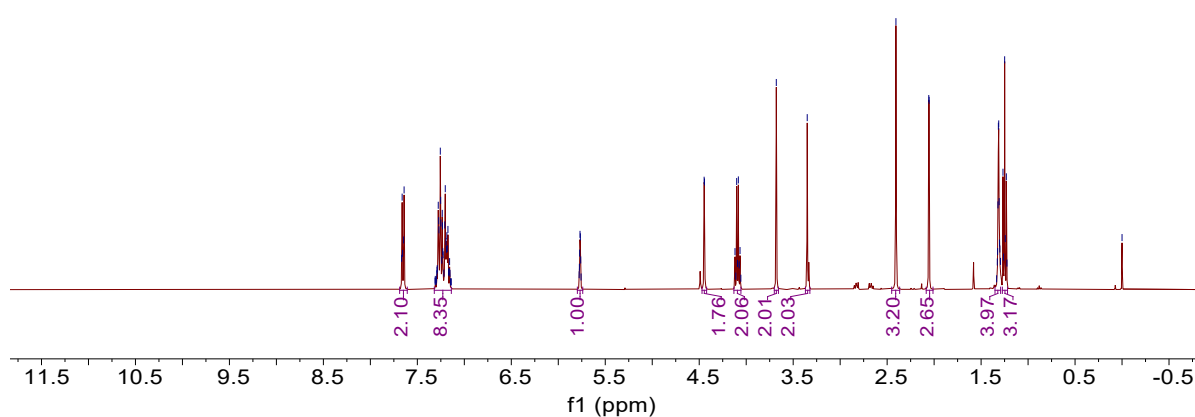



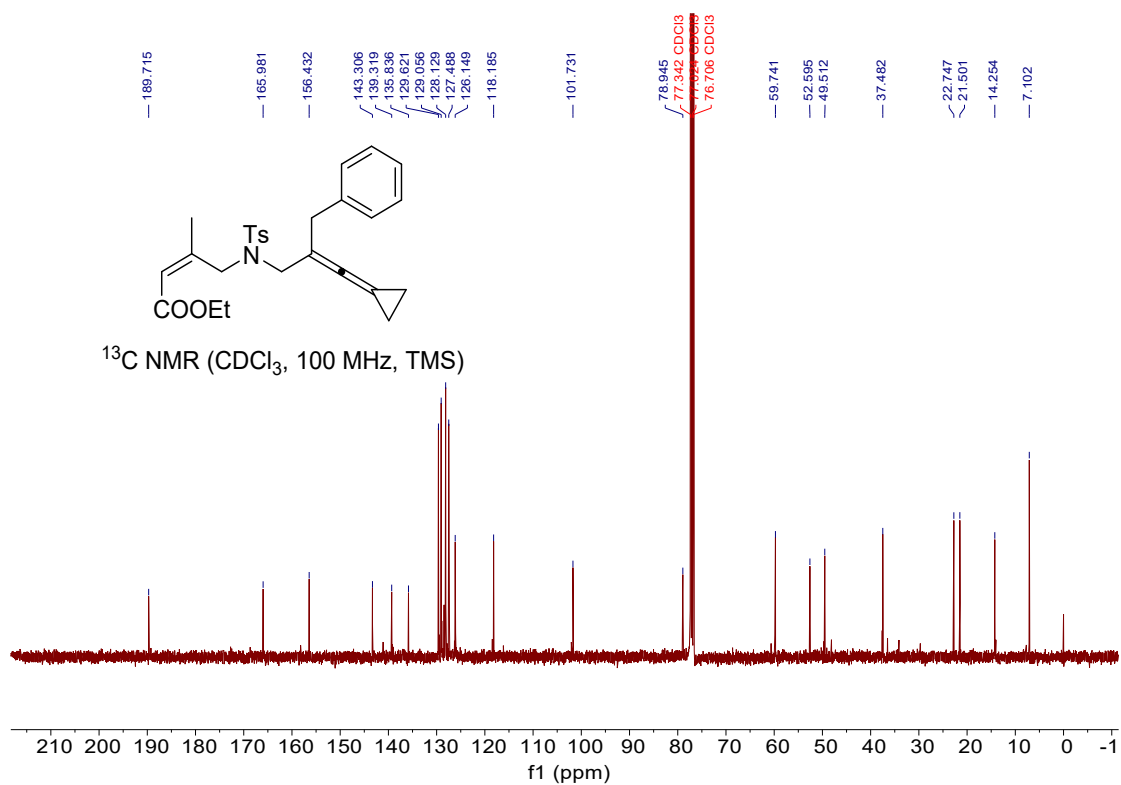

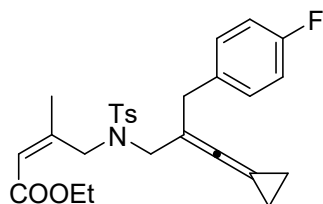

**ethyl (Z)-4-((N-(3-cyclopropylidene-2-(4-fluorobenzyl)- $\lambda^5$ -allyl)-4-methylphenyl)sulfonamido)-3-methylbut-2-enoate (3i)**

A colorless oil, 70% yield, 338.4 mg.  $^1\text{H}$  NMR (400 MHz,  $\text{CDCl}_3$ )  $\delta$  7.65 (d,  $J = 8.0$  Hz, 2H), 7.31 – 7.24 (m, 2H), 7.19 – 7.10 (m, 2H), 6.97 – 6.90 (m, 2H), 5.77 (h,  $J = 1.6$  Hz, 1H), 4.44 (s, 2H), 4.09 (q,  $J = 7.2$  Hz, 2H), 3.66 (s, 2H), 3.33 (s, 2H), 2.41 (s, 3H), 2.05 (d,  $J = 1.6$  Hz, 3H), 1.37 – 1.29 (m, 4H), 1.25 (t,  $J = 7.2$  Hz, 3H).  $^{13}\text{C}$  NMR (100 MHz,  $\text{CDCl}_3$ )  $\delta$  189.6, 166.0, 161.5 (d,  $J_{\text{C-F}} = 242.3$  Hz), 156.2, 143.4, 135.8, 135.0, 134.9, 130.5 (d,  $J_{\text{C-F}} = 7.9$  Hz), 129.7, 127.5, 118.3, 114.8 (d,  $J_{\text{C-F}} = 2.1$  Hz), 101.9, 79.1, 59.8, 52.6, 49.6, 36.6, 22.7, 21.5, 14.2, 7.1.  $^{19}\text{F}$  NMR (376 MHz,  $\text{CDCl}_3$ )  $\delta$  -117.25. IR (neat)  $\nu$  660, 1049, 1221, 1651, 1712, 2023, 2983  $\text{cm}^{-1}$ . HRMS (ESI) calcd. for  $\text{C}_{27}\text{H}_{30}\text{NO}_4\text{FSNa}$  ( $\text{M}+\text{Na}$ ) $^+$ : 506.1772, Found: 506.1764.

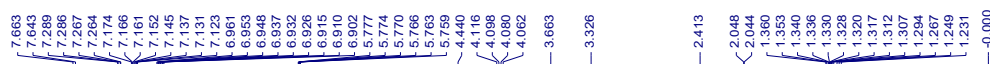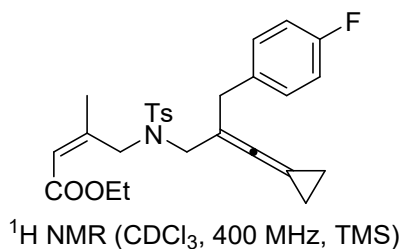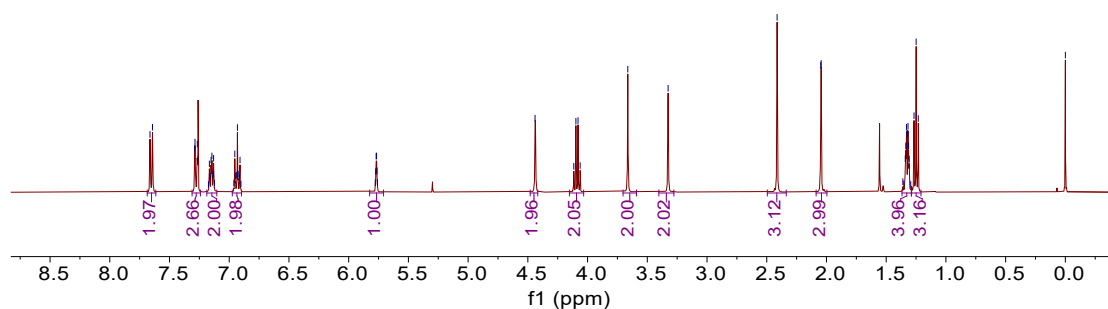

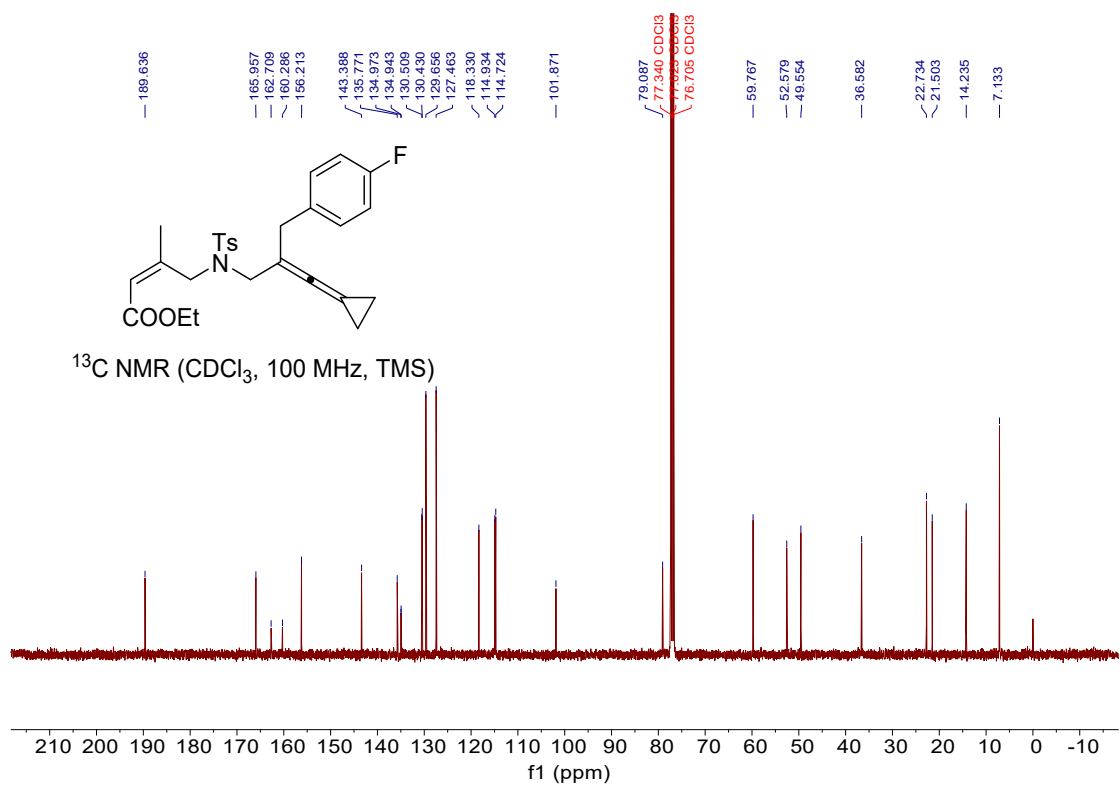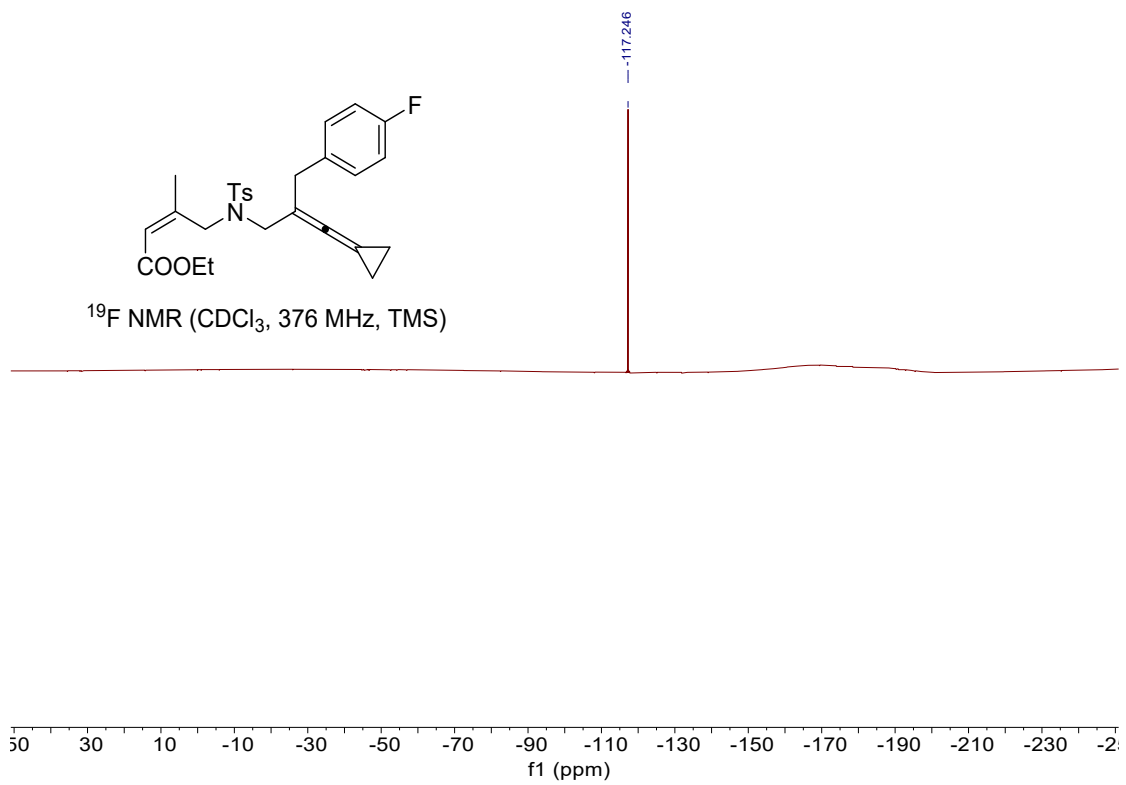

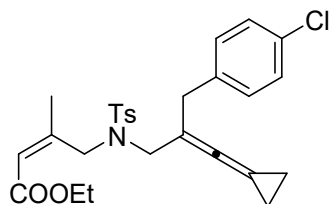

**ethyl (Z)-4-((N-(2-(4-chlorobenzyl)-3-cyclopropylidene- $\lambda^5$ -allyl)-4-methylphenyl)sulfonamido)-3-methylbut-2-enoate (3j)**

A yellow oil, 80% yield, 400.4 mg.  $^1\text{H}$  NMR (400 MHz,  $\text{CDCl}_3$ )  $\delta$  7.69 – 7.62 (m, 2H), 7.30 – 7.25 (m, 2H), 7.23 – 7.07 (m, 4H), 5.82 – 5.71 (m, 1H), 4.44 (d,  $J = 1.6$  Hz, 2H), 4.18 – 4.00 (m, 2H), 3.66 (d,  $J = 2.1$  Hz, 2H), 3.31 (d,  $J = 13.7$  Hz, 2H), 2.41 (s, 3H), 2.04 (d,  $J = 1.4$  Hz, 2H), 1.41 – 1.29 (m, 4H), 1.28 – 1.22 (m, 3H).  $^{13}\text{C}$  NMR (100 MHz,  $\text{CDCl}_3$ )  $\delta$  189.7, 189.6, 166.0, 156.1, 143.4, 137.8, 135.8, 131.9, 130.4, 129.7, 128.2, 127.5, 118.4, 101.5, 79.1, 59.8, 52.6, 49.6, 36.7, 22.7, 21.5, 14.2, 7.2. IR (neat)  $\nu$  670, 1221, 1658, 1712, 2016, 2953  $\text{cm}^{-1}$ . HRMS (ESI) calcd. for  $\text{C}_{27}\text{H}_{30}\text{NO}_4\text{SClNa}$  ( $\text{M}+\text{Na}$ ) $^+$ : 522.1476, Found: 522.1479.

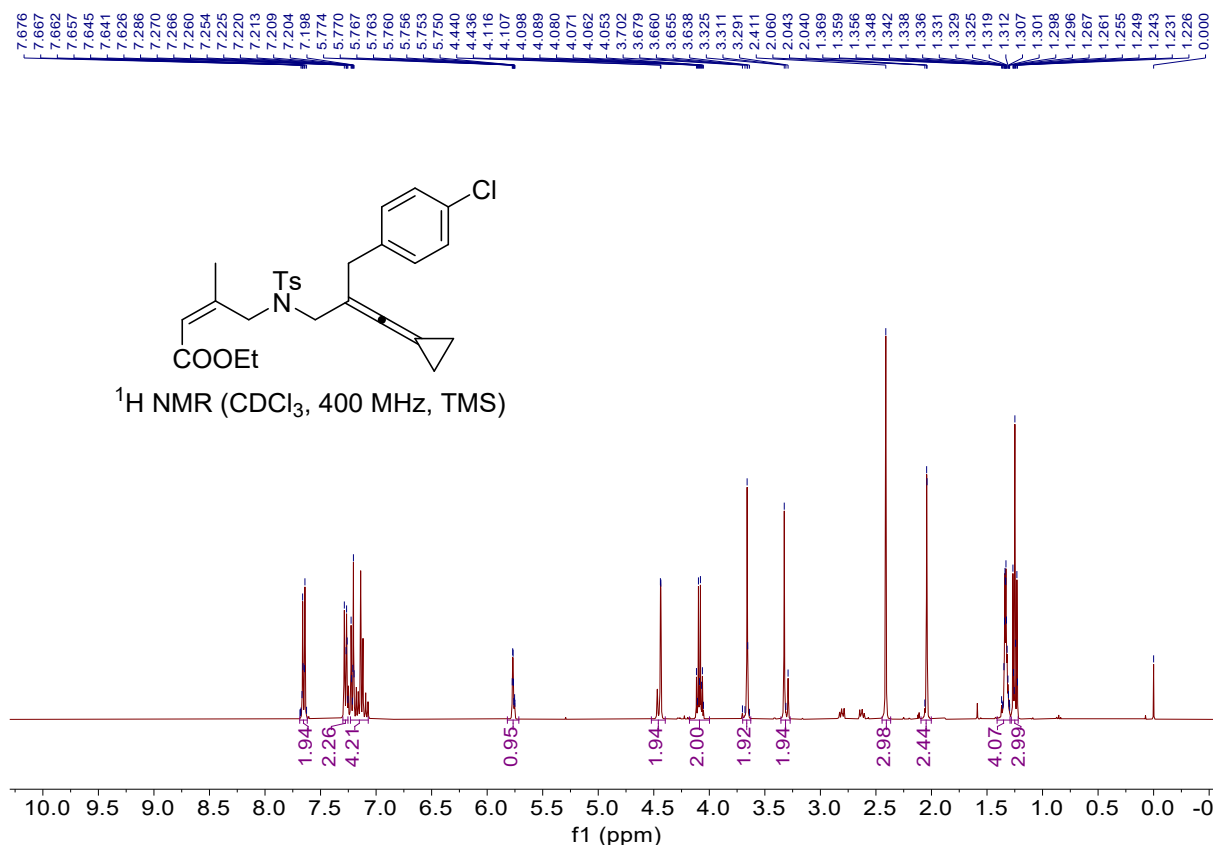

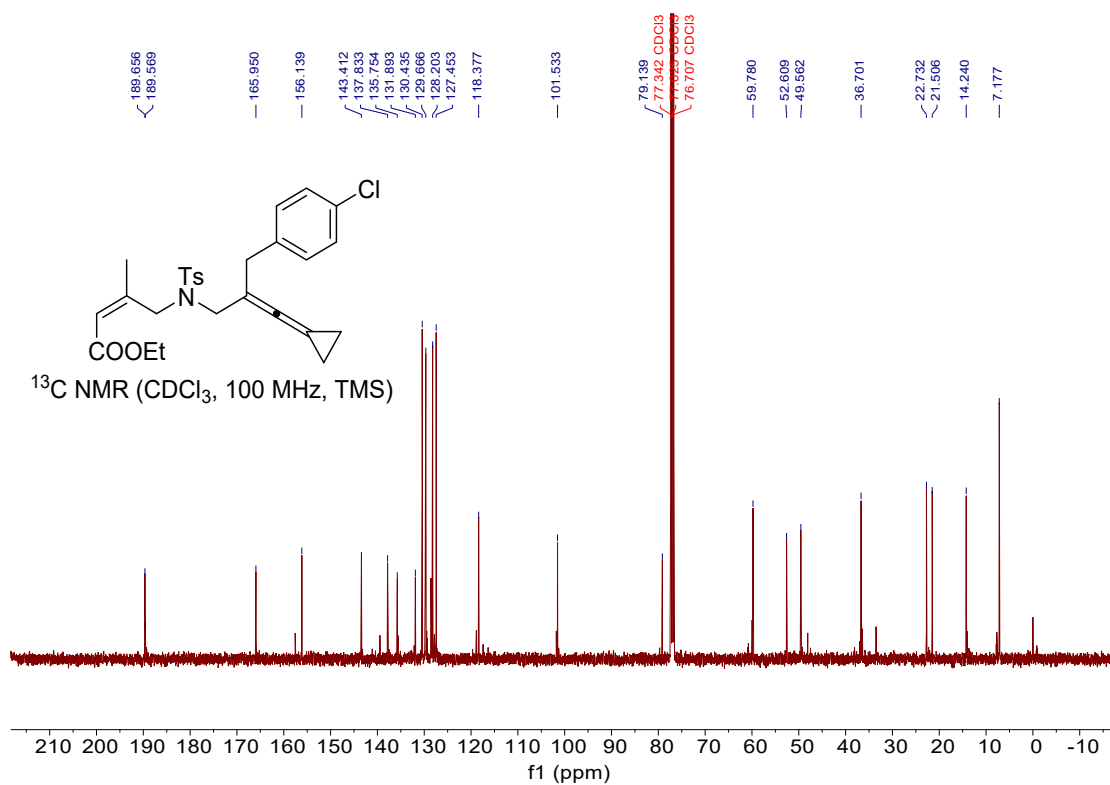

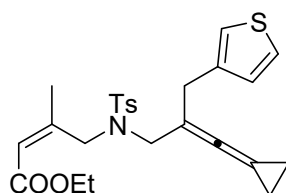

**ethyl (Z)-4-((N-(3-cyclopropylidene-2-(thiophen-3-ylmethyl)-λ<sup>5</sup>-allyl)-4-methylphenyl)sulfonamido)-3-methylbut-2-enoate (3k)**

A colorless oil, 82% yield, 378.4 mg. <sup>1</sup>H NMR (400 MHz, CDCl<sub>3</sub>) δ 7.66 (d, *J* = 8.0 Hz, 2H), 7.28 (d, *J* = 8.0 Hz, 2H), 7.20 (dd, *J* = 4.8, 2.8 Hz, 1H), 7.02 (dd, *J* = 2.8, 1.2 Hz, 1H), 6.92 (dd, *J* = 4.8, 1.2 Hz, 1H), 5.77 (q, *J* = 1.6 Hz, 1H), 4.44 (d, *J* = 1.6 Hz, 2H), 4.10 (q, *J* = 7.2 Hz, 2H), 3.69 (s, 2H), 3.38 (s, 2H), 2.41 (s, 3H), 2.04 (d, *J* = 1.6 Hz, 3H), 1.37 – 1.31 (m, 4H), 1.25 (t, *J* = 7.2 Hz, 3H). <sup>13</sup>C NMR (100 MHz, CDCl<sub>3</sub>) δ 189.5, 166.0, 156.4, 143.4, 139.5, 135.8, 129.7, 128.7, 127.5, 125.0, 121.6, 118.2, 101.2, 79.0, 59.8, 52.7, 49.6, 31.9, 22.7, 21.5, 14.3, 7.1. IR (neat) ν 731, 1346, 1651, 1712, 2022, 2926 cm<sup>-1</sup>. HRMS (ESI) calcd. for C<sub>25</sub>H<sub>29</sub>NO<sub>4</sub>S<sub>2</sub>Na (M+Na)<sup>+</sup>: 494.1430, Found: 494.1428.

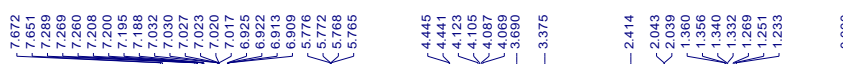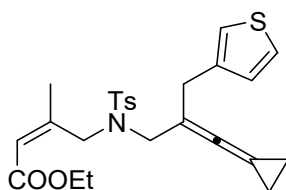

<sup>1</sup>H NMR (CDCl<sub>3</sub>, 400 MHz, TMS)

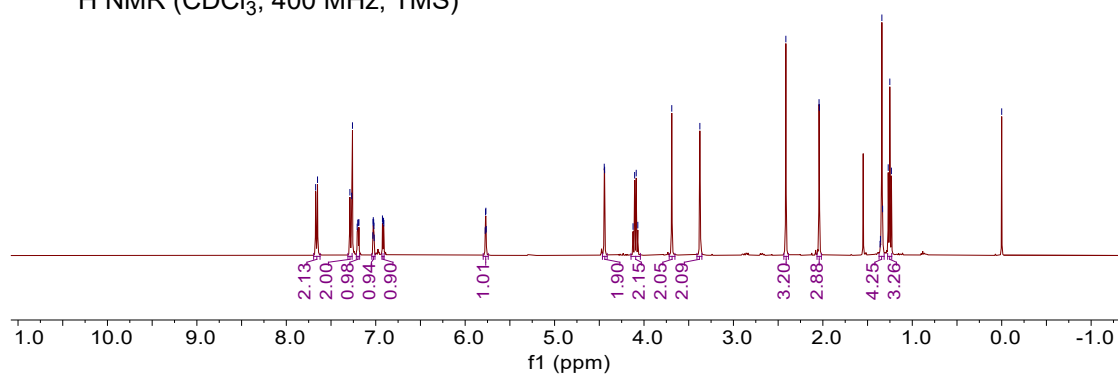

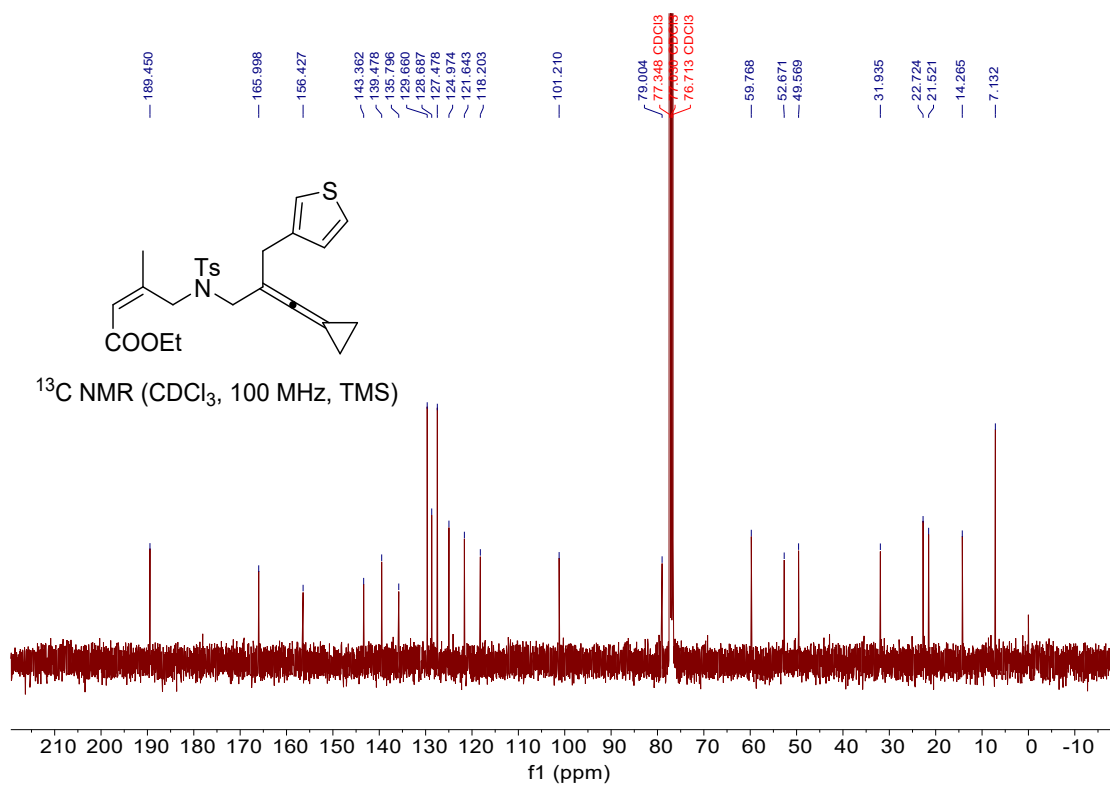

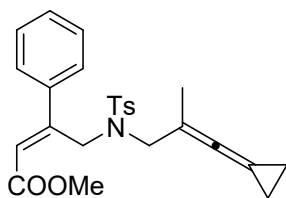

**methyl (Z)-4-((N-(3-cyclopropylidene-2-methyl- $\lambda^5$ -allyl)-4-methylphenyl)sulfonamido)-3-phenylbut-2-enoate (3l)**

A colorless oil, 80% yield, 368.4 mg.  $^1\text{H}$  NMR (400 MHz,  $\text{CDCl}_3$ )  $\delta$  7.67 (d,  $J = 8.0$  Hz, 2H), 7.55 – 7.51 (m, 2H), 7.37 – 7.33 (m, 3H), 7.29 (d,  $J = 8.0$  Hz, 2H), 6.11 (d,  $J = 1.2$  Hz, 1H), 4.97 (d,  $J = 1.2$  Hz, 2H), 3.69 (s, 3H), 3.56 (s, 2H), 2.42 (s, 3H), 1.47 – 1.33 (m, 4H), 1.18 (s, 3H).  $^{13}\text{C}$  NMR (100 MHz,  $\text{CDCl}_3$ )  $\delta$  188.7, 166.5, 155.6, 143.3, 138.4, 135.8, 129.7, 129.1, 128.3, 127.9, 127.5, 119.9, 98.3, 76.7, 54.2, 51.4, 46.6, 21.5, 16.5, 6.3. IR (neat)  $\nu$  663, 1346, 1629, 1721, 2024, 2949  $\text{cm}^{-1}$ . HRMS (ESI) calcd. for  $\text{C}_{25}\text{H}_{27}\text{NO}_4\text{SNa}$  ( $\text{M}+\text{Na}$ ) $^+$ : 460.1553, Found: 460.1554.

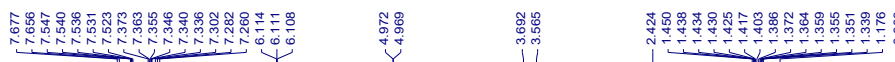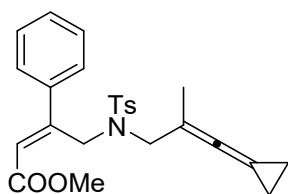

$^1\text{H}$  NMR ( $\text{CDCl}_3$ , 400 MHz, TMS)

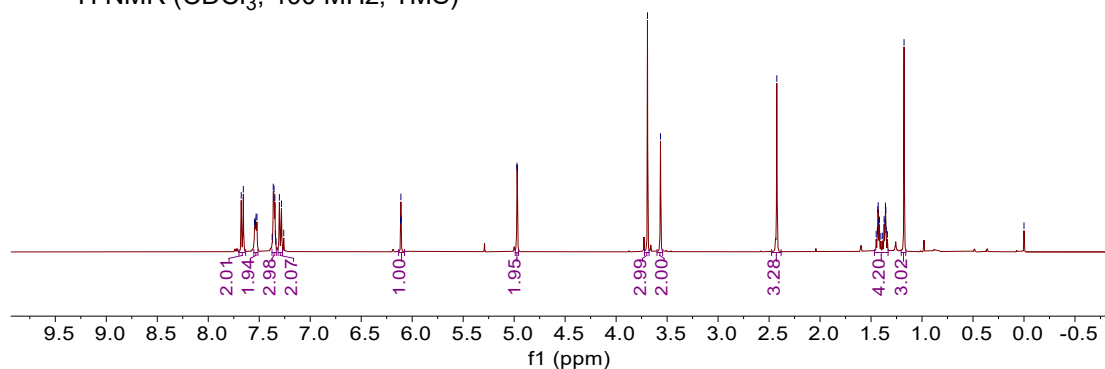



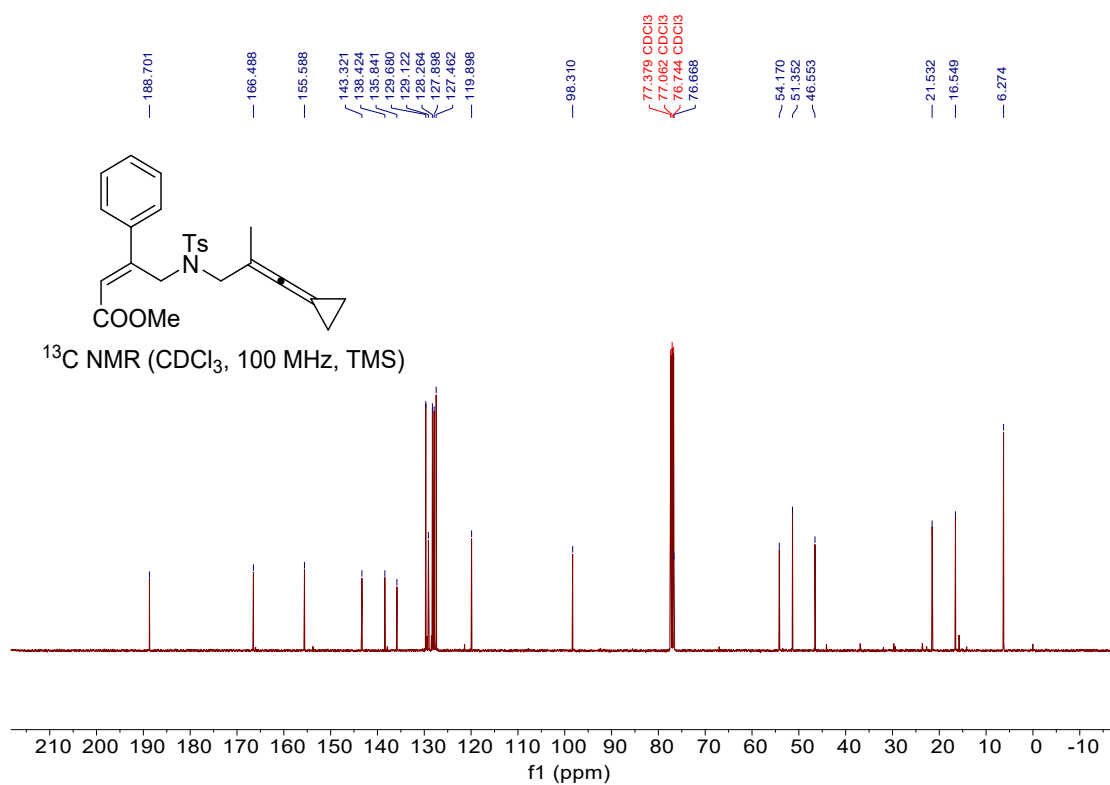

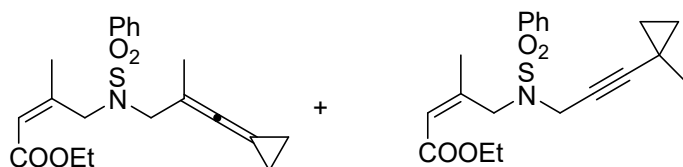

ethyl (Z)-4-(N-(3-cyclopropylidene-2-methyl- $\lambda^5$ -allyl)phenylsulfonamido)-3-methylbut-2-enoate (3m) + ethyl (Z)-3-methyl-4-(N-(3-(1-methylcyclopropyl)prop-2-yn-1-yl)phenylsulfonamido)but-2-enoate (byproduct 3m') (1m: 1m'=5:1)

A colorless oil, 80% yield, 300.4 mg.  $^1\text{H}$  NMR (400 MHz,  $\text{CDCl}_3$ )  $\delta$  7.84 – 7.81 (m, 2H), 7.59 – 7.55 (m, 1H), 7.54 – 7.50 (m, 2H), 5.79 (q,  $J = 1.6$  Hz, 1H), 4.46 (s, 2H), 4.09 (t,  $J = 7.2$  Hz, 2H), 3.74 (s, 2H), 2.02 (d,  $J = 1.6$  Hz, 3H), 1.68 (s, 3H), 1.40 – 1.31 (m, 4H), 1.25 (t,  $J = 7.2$  Hz, 3H).  $^{13}\text{C}$  NMR (100 MHz,  $\text{CDCl}_3$ )  $\delta$  188.9, 166.0, 156.0, 139.2, 132.6, 129.0, 127.4, 118.5, 97.3, 77.5, 59.8, 54.2, 49.0, 23.7, 22.6, 22.3, 17.3, 15.9, 14.2, 6.8. IR (neat)  $\nu$  660, 1344, 1654, 1714, 2025, 2953  $\text{cm}^{-1}$ . HRMS (ESI) calcd. for  $\text{C}_{20}\text{H}_{25}\text{NO}_4\text{SNa}$  ( $\text{M}+\text{Na}$ ) $^+$ : 398.1396, Found: 398.1395.

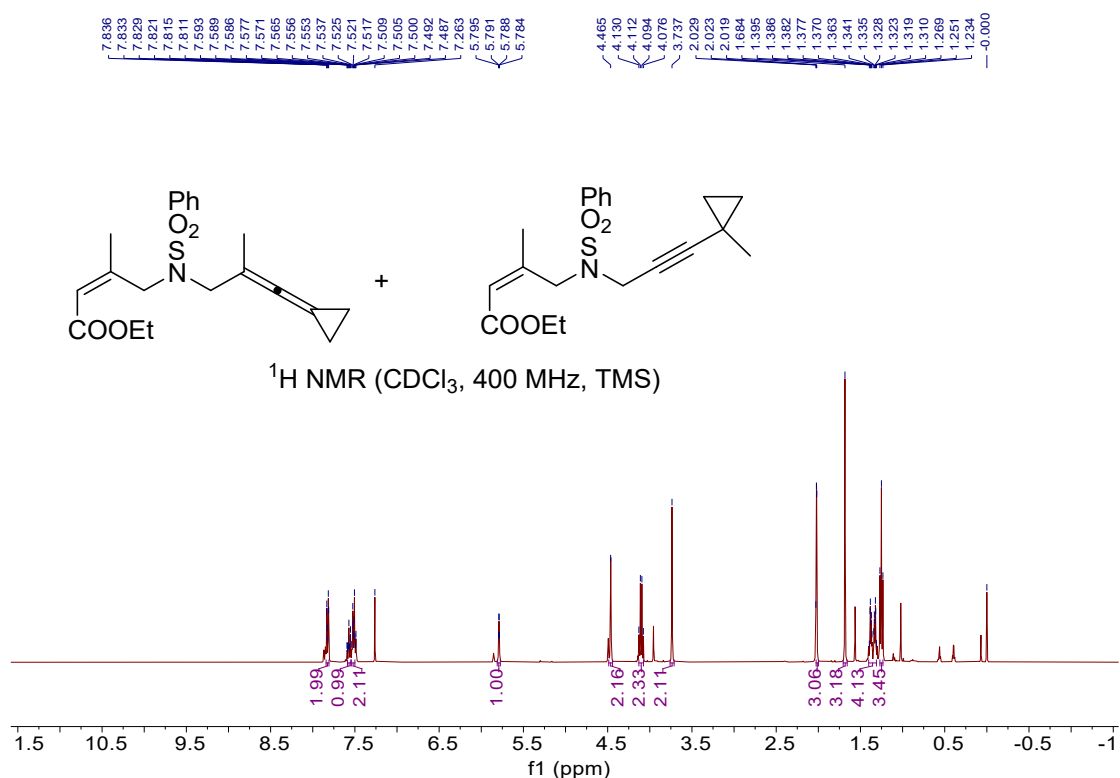

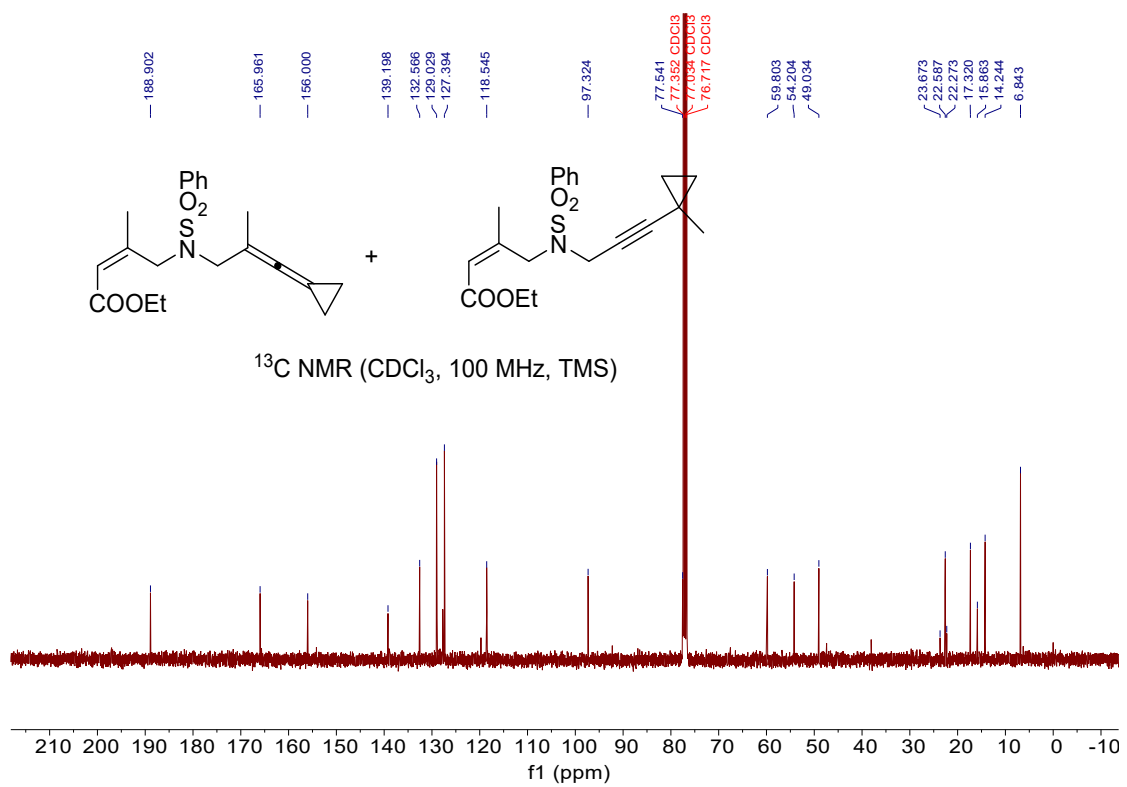

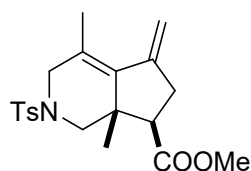

**(cis)-methyl-4,7a-dimethyl-5-methylene-2-tosyl-2,3,5,6,7,7a-hexahydro-1H-cyclopenta[c]pyridine-7-carboxylate (2a)**

A white solid, MP = 121-124 °C, 96% yield, 36.2 mg.  $^1\text{H}$  NMR (600 MHz,  $\text{CDCl}_3$ )  $\delta$  7.71 (d,  $J = 8.0$  Hz, 2H), 7.35 (d,  $J = 8.0$  Hz, 2H), 5.16 (s, 1H), 5.14 (s, 1H), 4.07 – 3.99 (m, 2H), 3.75 (s, 3H), 3.03 – 2.95 (m, 2H), 2.61 – 2.54 (m, 1H), 2.45 – 2.39 (m, 4H), 2.26 (d,  $J = 11.2$  Hz, 1H), 1.76 (s, 3H), 1.04 (s, 3H).  $^{13}\text{C}$  NMR (150 MHz,  $\text{CDCl}_3$ )  $\delta$  172.6, 143.6, 143.4, 137.9, 133.6, 129.7, 127.6, 124.0, 111.2, 54.3, 51.9, 50.2, 49.4, 45.5, 32.8, 21.5, 19.2, 17.1. IR (neat)  $\nu$  660, 1019, 1220, 1355, 1597, 1709, 2953  $\text{cm}^{-1}$ . HRMS (ESI) calcd. for  $\text{C}_{20}\text{H}_{25}\text{NO}_4\text{SNa}$  ( $\text{M}+\text{Na}$ ) $^+$ : 398.1396, Found: 398.1404.

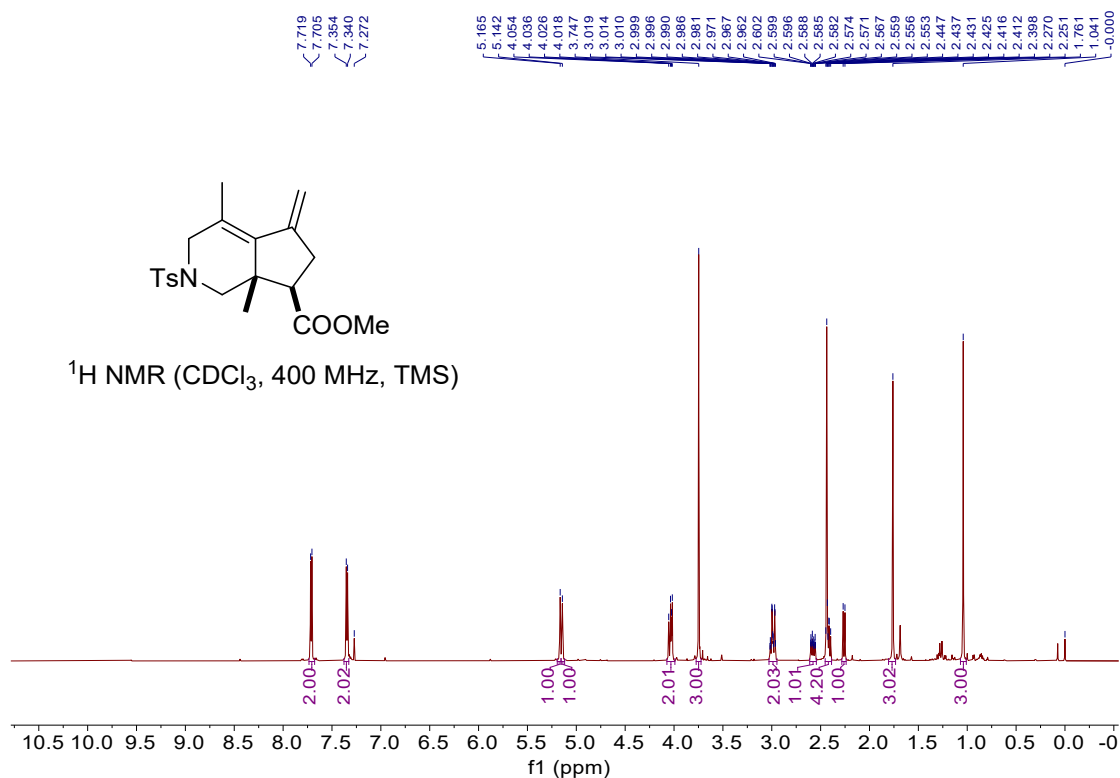

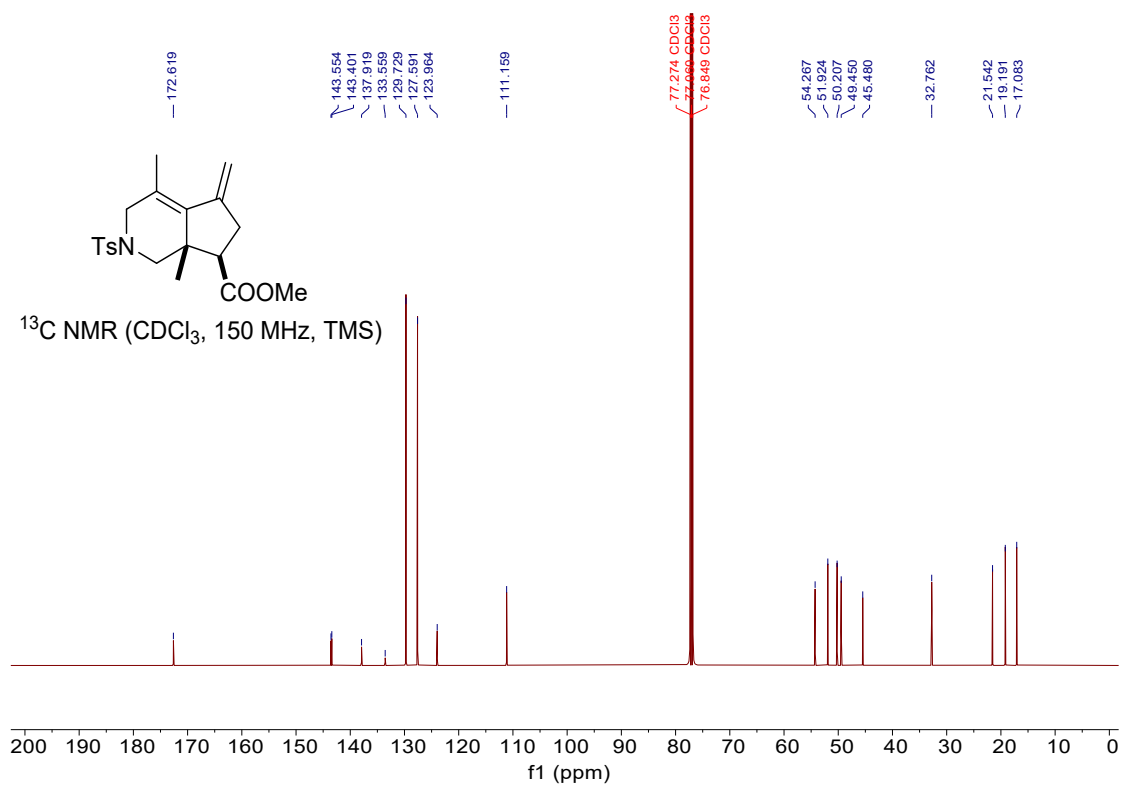

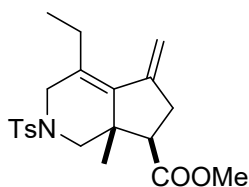

**(cis)-methyl-4-ethyl-7a-methyl-5-methylene-2-tosyl-2,3,5,6,7,7a-hexahydro-1H-cyclopenta[c]pyridine-7-carboxylate (2b)**

A colorless oil, 94% yield, 36.6 mg.  $^1\text{H}$  NMR (400 MHz,  $\text{CDCl}_3$ )  $\delta$  7.71 (d,  $J = 8.0$  Hz, 2H), 7.35 (d,  $J = 8.0$  Hz, 2H), 5.22 – 5.03 (m, 2H), 4.12 (d,  $J = 16.8$  Hz, 1H), 4.01 (d,  $J = 11.2$  Hz, 1H), 3.74 (s, 3H), 3.04 – 2.87 (m, 2H), 2.63 – 2.53 (m, 1H), 2.49 – 2.37 (m, 5H), 2.23 (d,  $J = 11.2$  Hz, 1H), 1.91 – 1.79 (m, 1H), 1.11 – 0.99 (m, 6H).  $^{13}\text{C}$  NMR (150 MHz,  $\text{CDCl}_3$ )  $\delta$  172.6, 143.6, 142.8, 137.4, 133.4, 130.3, 129.7, 127.6, 110.4, 54.4, 51.9, 50.2, 47.8, 45.4, 32.7, 27.9, 23.6, 21.5, 19.3, 12.6. IR (neat)  $\nu$  662, 1348, 1597, 1736, 2962  $\text{cm}^{-1}$ . HRMS (ESI) calcd. for  $\text{C}_{21}\text{H}_{28}\text{NO}_4\text{SNa}$  ( $\text{M}+\text{Na}$ ) $^+$ : 412.1553, Found: 412.1541.

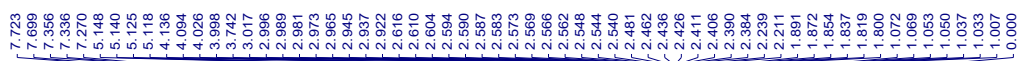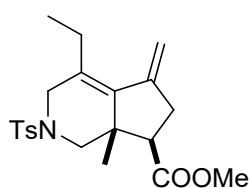

$^1\text{H}$  NMR ( $\text{CDCl}_3$ , 400 MHz, TMS)

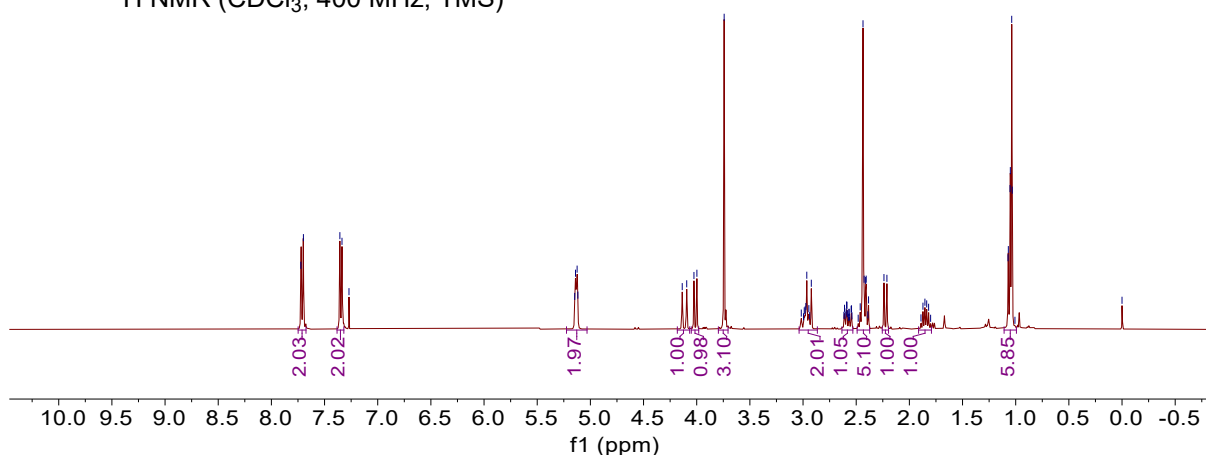

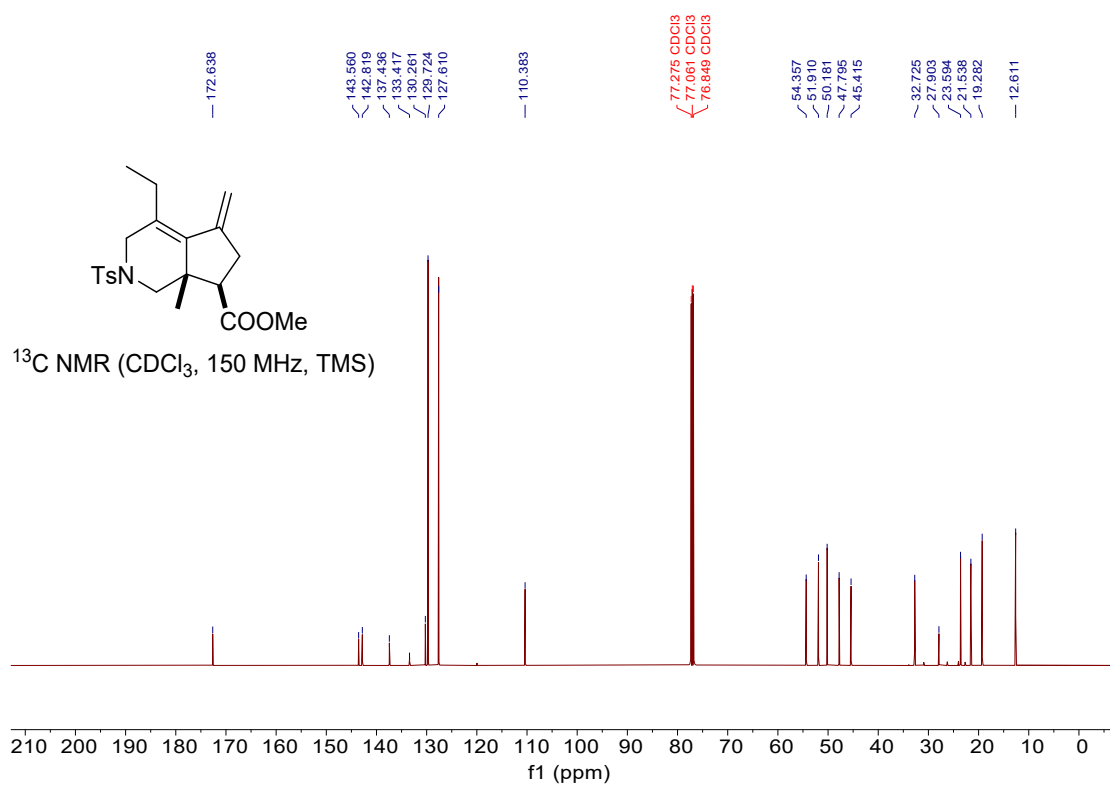

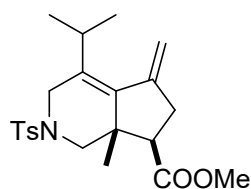

**(cis)-methyl-4-isopropyl-7a-methyl-5-methylene-2-tosyl-2,3,5,6,7,7a-hexahydro-1H-cyclopenta[c]pyridine-7-carboxylate (2c)**

A colorless oil, MP = 119-122 °C, 92% yield, 37.1 mg.  $^1\text{H}$  NMR (400 MHz,  $\text{CDCl}_3$ )  $\delta$  7.71 (d,  $J = 8.0$  Hz, 2H), 7.35 (d,  $J = 8.0$  Hz, 2H), 5.20 – 5.12 (m, 2H), 4.07 (d,  $J = 16.8$  Hz, 1H), 3.98 (dd,  $J = 11.2, 0.8$  Hz, 1H), 3.74 (s, 3H), 3.16 (p,  $J = 7.2$  Hz, 1H), 3.06 (d,  $J = 16.8$  Hz, 1H), 2.97 (ddt,  $J = 16.8, 11.2, 2.4$  Hz, 1H), 2.59 (ddt,  $J = 17.4, 9.2, 2.4$  Hz, 1H), 2.47 – 2.39 (m, 4H), 2.18 (d,  $J = 11.2$  Hz, 1H), 1.11 (d,  $J = 7.2$  Hz, 3H), 1.03 (s, 3H), 0.91 (d,  $J = 7.2$  Hz, 3H).  $^{13}\text{C}$  NMR (150 MHz,  $\text{CDCl}_3$ )  $\delta$  172.7, 143.6, 142.8, 136.7, 133.5, 133.3, 129.7, 127.6, 111.1, 54.4, 51.9, 50.0, 45.3, 43.9, 32.6, 28.1, 21.7, 21.5, 19.8, 19.3. IR (neat)  $\nu$  662, 1216, 1350, 1651, 1736, 2953  $\text{cm}^{-1}$ . HRMS (ESI) calcd. for  $\text{C}_{22}\text{H}_{29}\text{NO}_4\text{SNa}$  ( $\text{M}+\text{Na}$ ) $^+$ : 426.1710, Found: 426.1706.

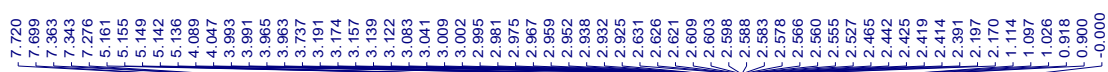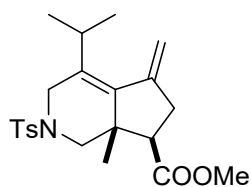

$^1\text{H}$  NMR ( $\text{CDCl}_3$ , 400 MHz, TMS)

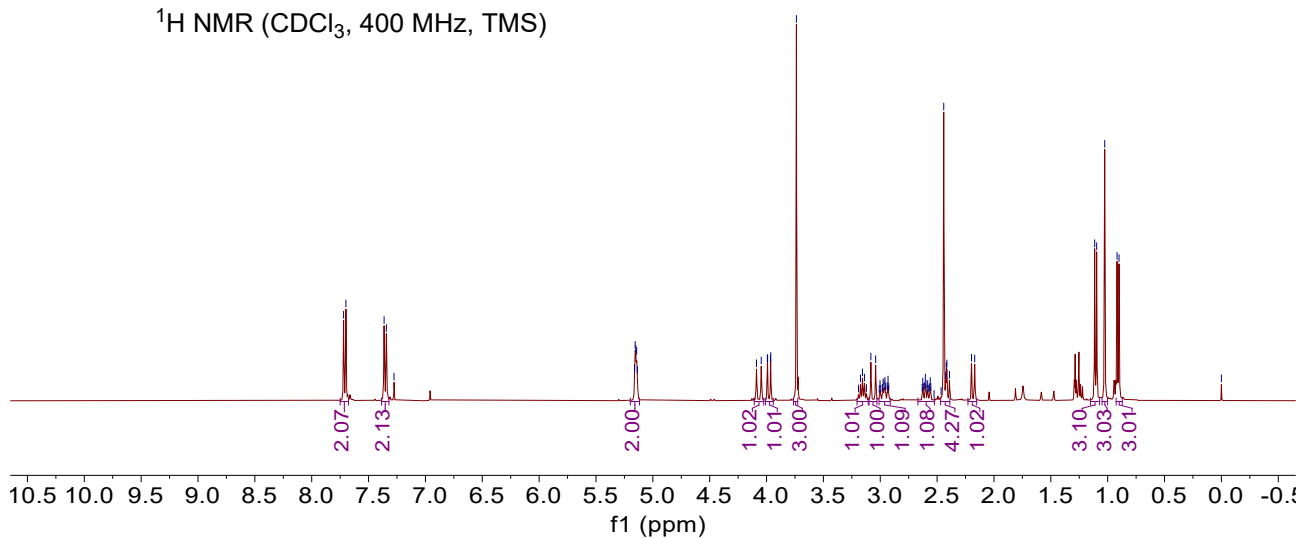



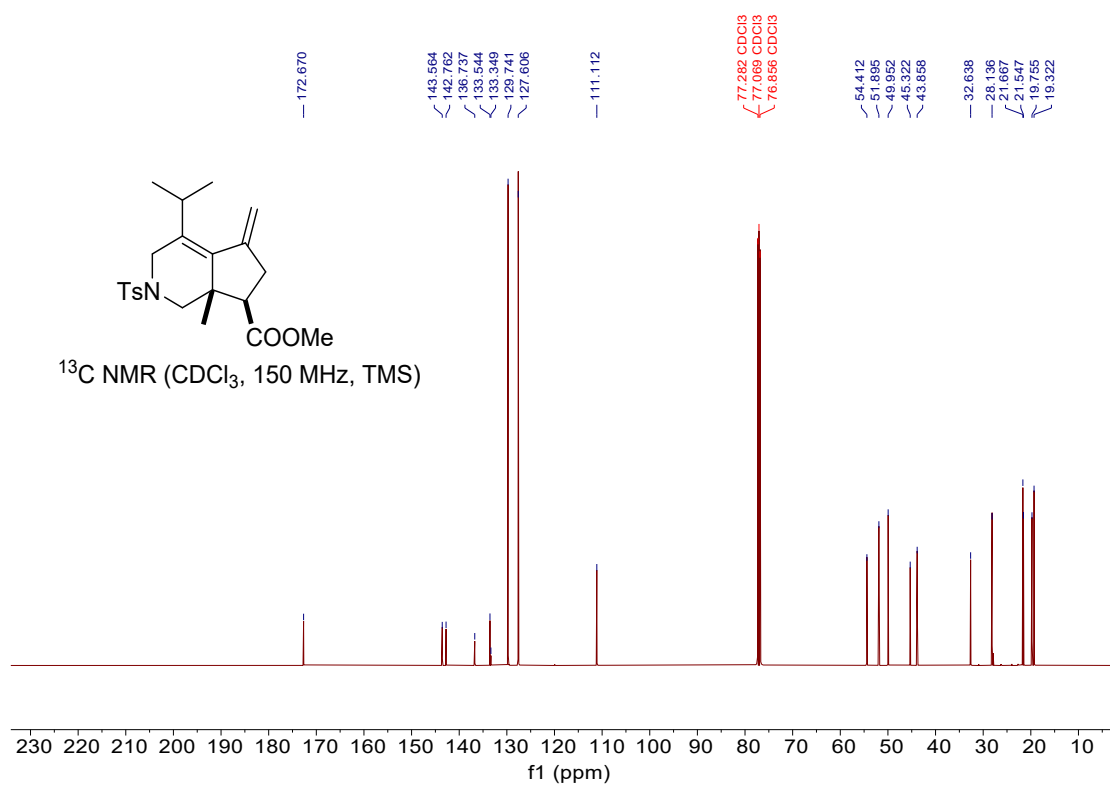

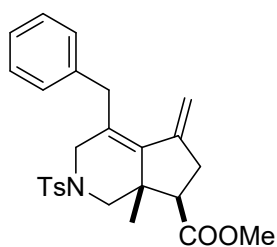

**(cis)-methyl-4-benzyl-7a-methyl-5-methylene-2-tosyl-2,3,5,6,7,7a-hexahydro-1H-cyclopenta[c]pyridine-7-carboxylate (2d)**

A colorless oil, 94% yield, 42.4 mg.  $^1\text{H}$  NMR (400 MHz,  $\text{CDCl}_3$ )  $\delta$  7.65 (d,  $J = 8.0$  Hz, 2H), 7.35 – 7.24 (m, 4H), 7.22 (d,  $J = 7.2$  Hz, 1H), 7.08 (d,  $J = 7.2$  Hz, 2H), 5.11 (s, 1H), 5.06 (s, 1H), 4.10 – 3.99 (m, 2H), 3.84 (d,  $J = 16.0$  Hz, 1H), 3.77 (s, 3H), 3.20 (d,  $J = 16.0$  Hz, 1H), 3.08 – 2.91 (m, 2H), 2.63 (ddt,  $J = 17.2, 8.8, 2.0$  Hz, 1H), 2.50 (dd,  $J = 11.2, 8.8$  Hz, 1H), 2.43 (s, 3H), 2.30 (d,  $J = 11.2$  Hz, 1H), 1.15 (s, 3H).  $^{13}\text{C}$  NMR (100 MHz,  $\text{CDCl}_3$ )  $\delta$  172.6, 143.6, 142.6, 140.7, 137.8, 133.3, 129.7, 128.8, 127.8, 127.6, 126.5, 125.9, 111.0, 54.4, 52.0, 50.1, 48.5, 45.7, 36.0, 32.5, 21.5, 19.4. IR (neat)  $\nu$  659, 1091, 1349, 1654, 1736, 2929  $\text{cm}^{-1}$ . HRMS (ESI) calcd. for  $\text{C}_{26}\text{H}_{29}\text{NO}_4\text{SNa}$  ( $\text{M}+\text{Na}$ ) $^+$ : 474.1710, Found: 474.1714.

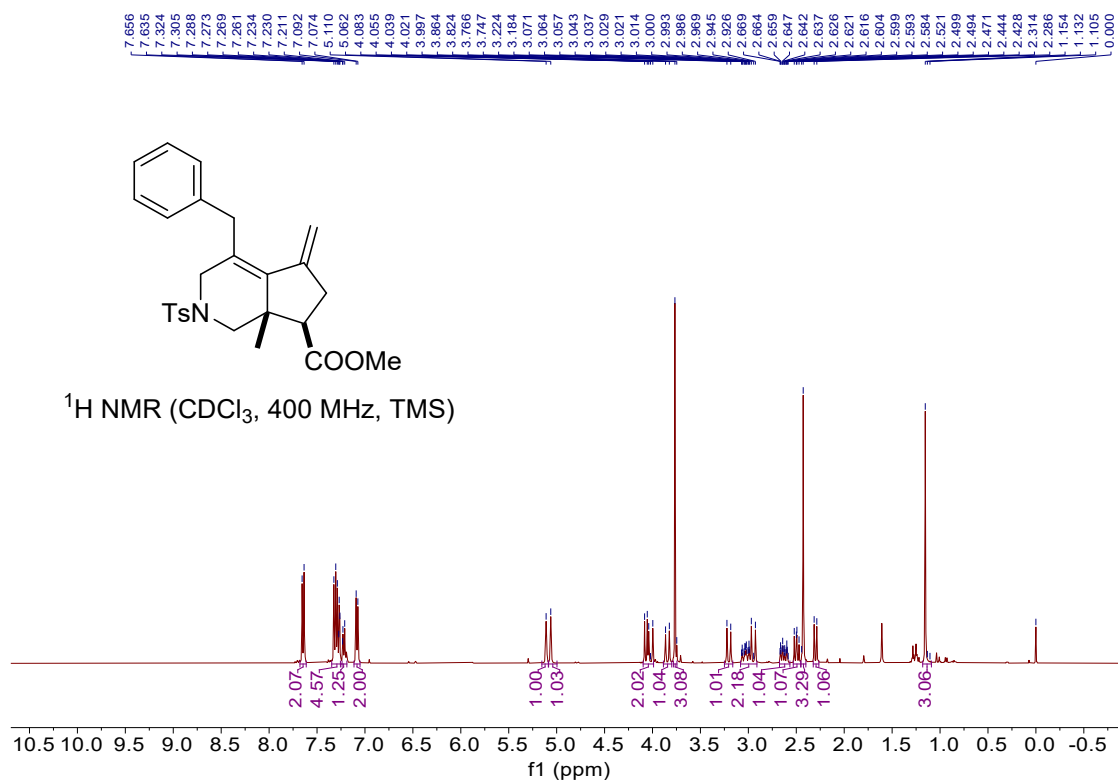



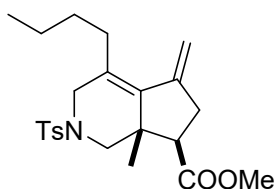

**(cis)-methyl-4-butyl-7a-methyl-5-methylene-2-tosyl-2,3,5,6,7,7a-hexahydro-1H-cyclopenta[c]pyridine-7-carboxylate (2e)**

A colorless oil, 92% yield, 38.4 mg.  $^1\text{H}$  NMR (600 MHz,  $\text{CDCl}_3$ )  $\delta$  7.71 (d,  $J = 8.4$  Hz, 2H), 7.35 (d,  $J = 8.4$  Hz, 2H), 5.12 (d,  $J = 2.4$  Hz, 1H), 5.11 (d,  $J = 2.4$  Hz, 1H), 4.10 (d,  $J = 16.8$  Hz, 1H), 4.04 – 3.98 (m, 1H), 3.74 (s, 3H), 3.02 – 2.93 (m, 2H), 2.61 – 2.54 (m, 1H), 2.44 (s, 3H), 2.43 – 2.34 (m, 2H), 2.23 (d,  $J = 11.2$  Hz, 1H), 1.84 – 1.76 (m, 1H), 1.50 – 1.42 (m, 1H), 1.40 – 1.30 (m, 3H), 1.03 (s, 3H), 0.92 (t,  $J = 7.2$  Hz, 3H).  $^{13}\text{C}$  NMR (100 MHz,  $\text{CDCl}_3$ )  $\delta$  172.6, 143.5, 142.9, 137.6, 133.5, 129.7, 129.3, 127.6, 110.3, 54.3, 51.9, 50.2, 48.3, 45.5, 32.8, 30.5, 30.4, 22.9, 21.5, 19.3, 13.9. IR (neat)  $\nu$  662, 1091, 1356, 1651, 1736, 2923  $\text{cm}^{-1}$ . HRMS (ESI) calcd. for  $\text{C}_{23}\text{H}_{31}\text{NO}_4\text{SNa}$  ( $\text{M}+\text{Na}$ ) $^+$ : 440.18666, Found: 440.1863.

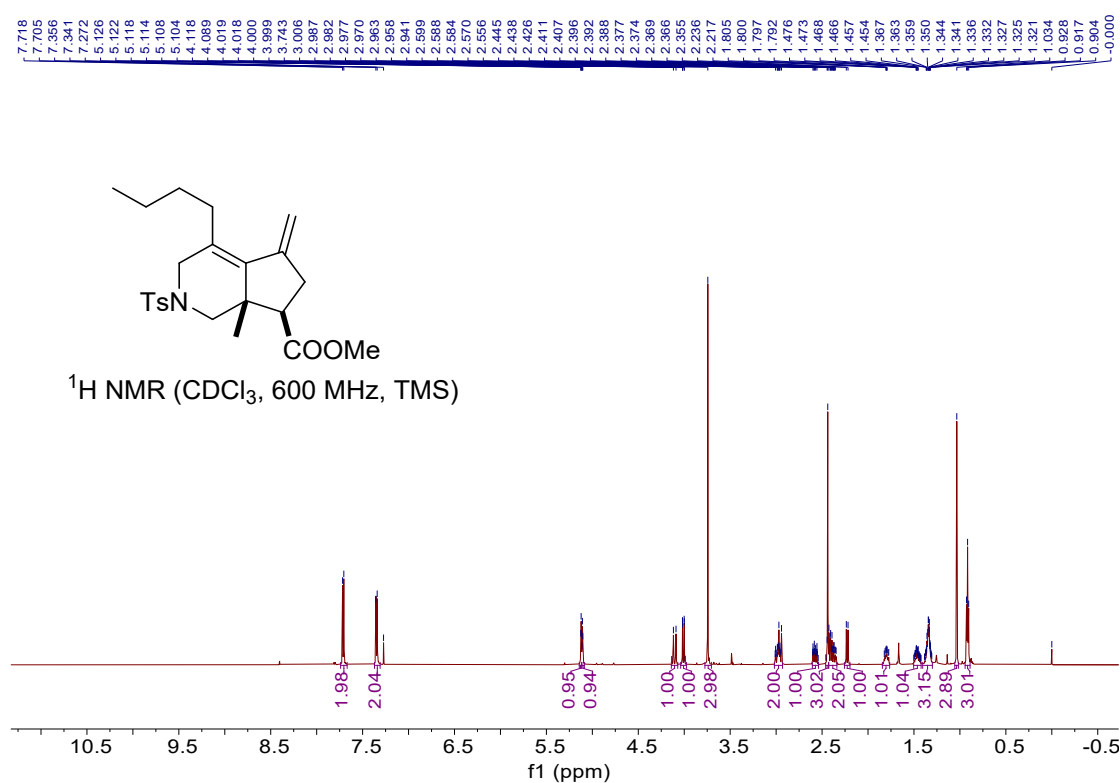

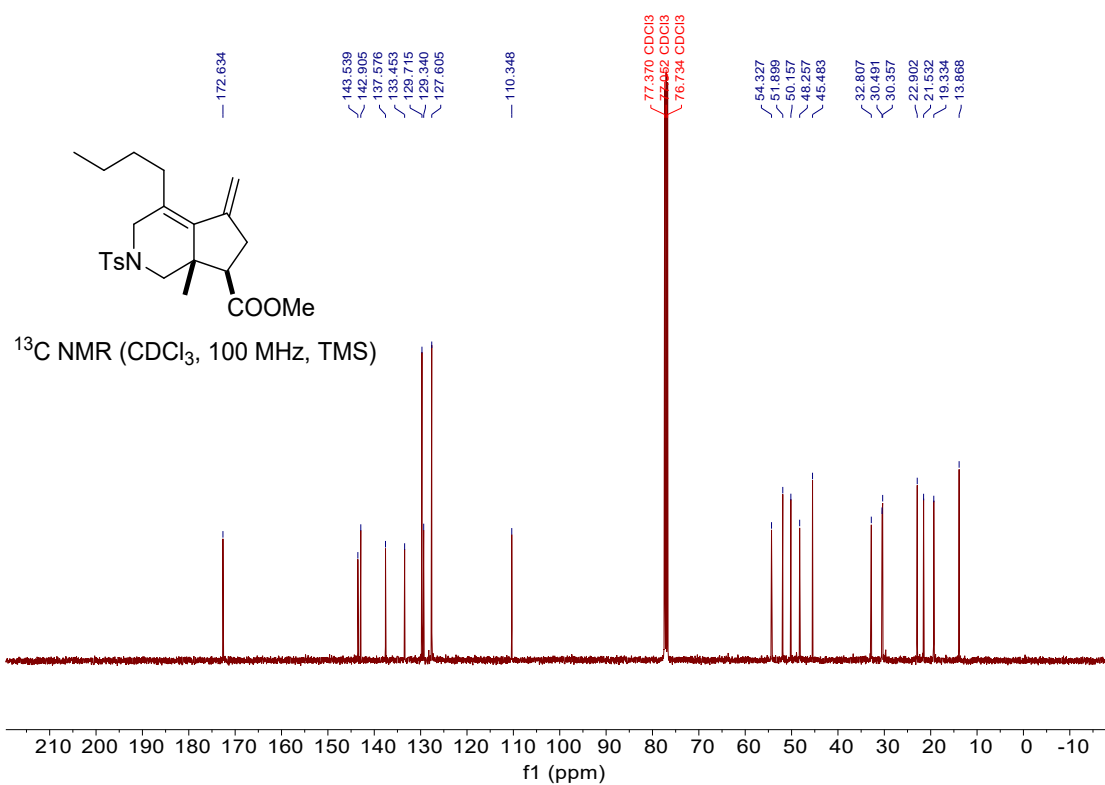

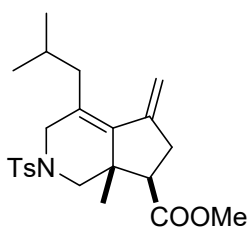

**(cis)-methyl-4-isobutyl-7a-methyl-5-methylene-2-tosyl-2,3,5,6,7,7a-hexahydro-1H-cyclopenta[c]pyridine-7-carboxylate (2f)**

A colorless oil, 90% yield, 37.5 mg.  $^1\text{H}$  NMR (400 MHz,  $\text{CDCl}_3$ )  $\delta$  7.71 (d,  $J = 8.0$  Hz, 2H), 7.35 (d,  $J = 8.0$  Hz, 2H), 5.21 (s, 1H), 5.12 (s, 1H), 4.10 (d,  $J = 17.2$  Hz, 1H), 4.02 (d,  $J = 11.2$  Hz, 1H), 3.75 (s, 3H), 3.04 – 2.92 (m, 2H), 2.63 – 2.53 (m, 1H), 2.44 (s, 4H), 2.25 (t,  $J = 8.8$  Hz, 2H), 1.89 – 1.77 (m, 2H), 1.05 (s, 3H), 0.93 – 0.85 (m, 6H).  $^{13}\text{C}$  NMR (100 MHz,  $\text{CDCl}_3$ )  $\delta$  172.6, 143.5, 143.0, 138.7, 133.5, 129.7, 128.7, 127.6, 110.8, 54.3, 51.9, 50.0, 48.7, 45.7, 39.0, 33.1, 27.3, 22.6, 22.3, 21.6, 21.5, 19.5. IR (neat)  $\nu$  661, 1090, 1340, 1655, 1736, 2955  $\text{cm}^{-1}$ . HRMS (ESI) calcd. for  $\text{C}_{23}\text{H}_{31}\text{NO}_4\text{SNa}$  ( $\text{M}+\text{Na}$ ) $^+$ : 440.1866, Found: 440.1864.

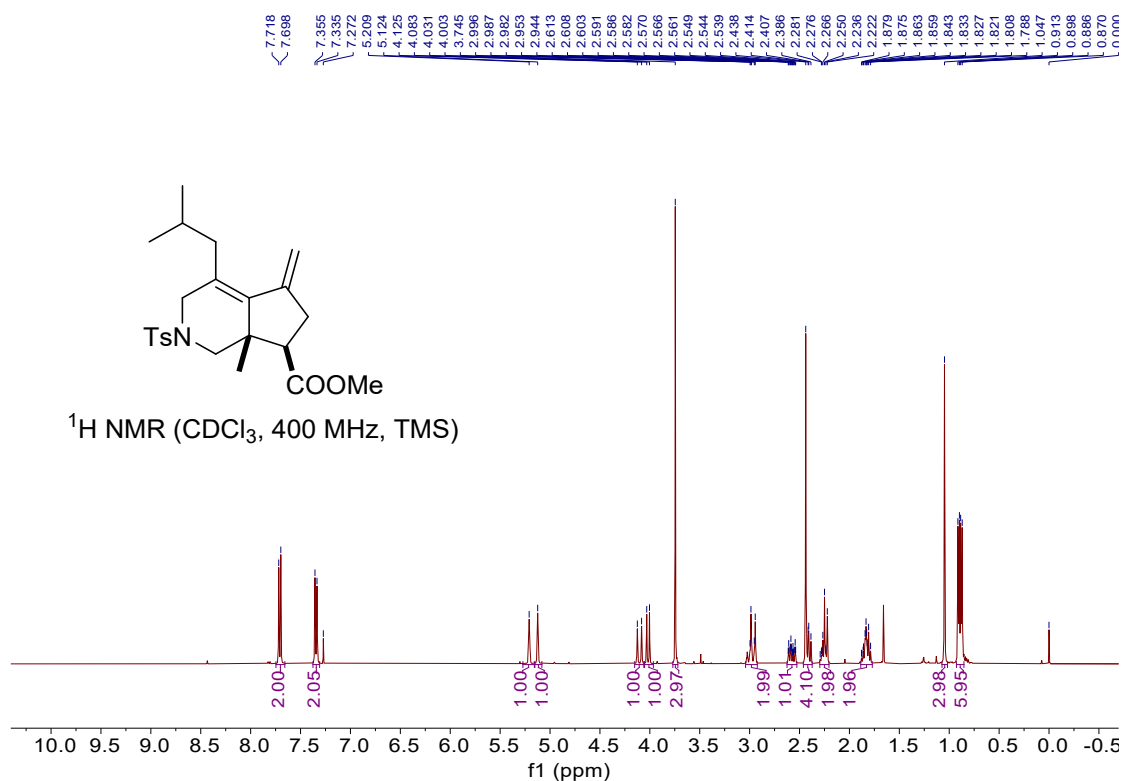

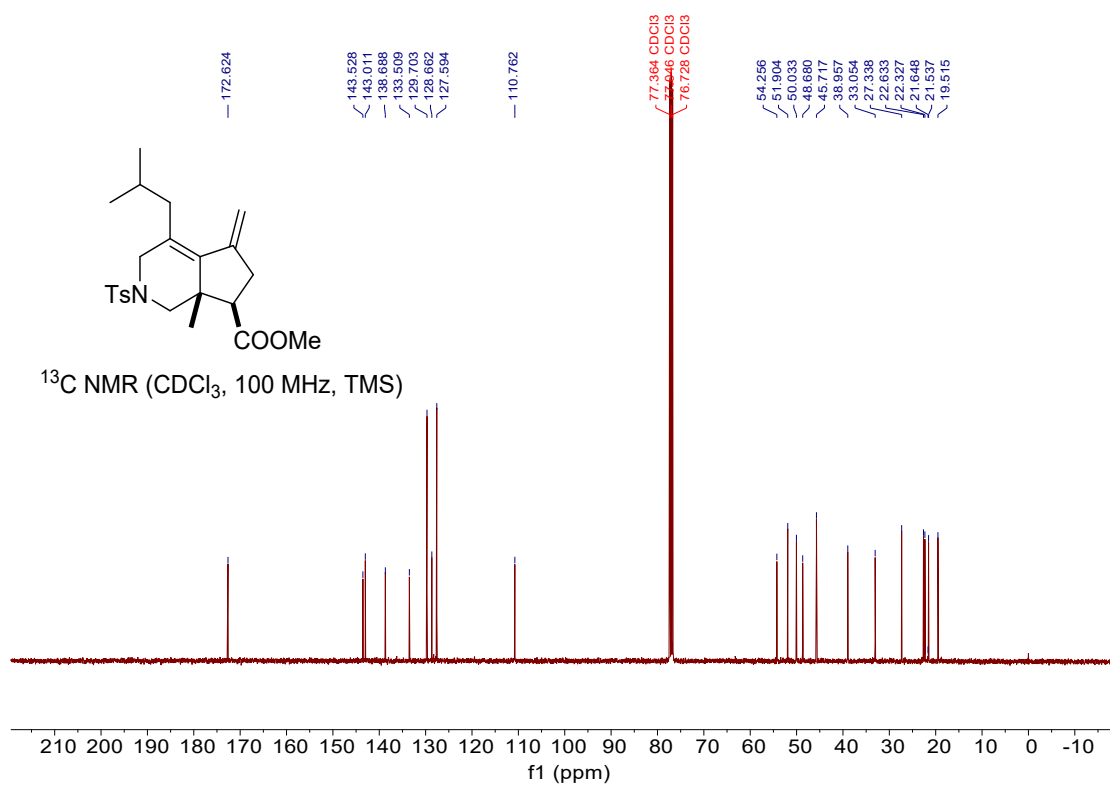

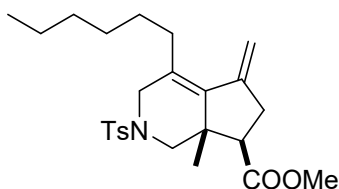

**(cis)-methyl-4-hexyl-7a-methyl-5-methylene-2-tosyl-2,3,5,6,7,7a-hexahydro-1H-cyclopenta[c]pyridine-7-carboxylate (2g)**

A colorless oil, 90% yield, 40.4 mg.  $^1\text{H}$  NMR (400 MHz,  $\text{CDCl}_3$ )  $\delta$  7.71 (d,  $J = 8.0$  Hz, 2H), 7.35 (d,  $J = 8.0$  Hz, 2H), 5.12 (s, 1H), 5.10 (s, 1H), 4.10 (d,  $J = 16.8$  Hz, 1H), 4.01 (d,  $J = 11.2$  Hz, 1H), 3.74 (s, 3H), 3.05 – 2.91 (m, 2H), 2.63 – 2.52 (m, 1H), 2.46 – 2.39 (m, 4H), 2.22 (d,  $J = 11.2$  Hz, 1H), 1.86 – 1.75 (m, 1H), 1.58 (s, 2H), 1.47 (dt,  $J = 11.8, 6.4$  Hz, 1H), 1.32 – 1.26 (m, 6H), 1.03 (s, 3H), 0.88 (d,  $J = 6.8$  Hz, 3H).  $^{13}\text{C}$  NMR (150 MHz,  $\text{CDCl}_3$ )  $\delta$  172.7, 143.5, 143.5, 142.9, 137.6, 133.4, 129.7, 129.4, 127.6, 110.4, 54.3, 51.9, 50.2, 48.3, 45.5, 32.8, 31.6, 30.8, 29.5, 28.2, 22.6, 21.5, 19.3, 14.0. IR (neat)  $\nu$  661, 1091, 1350, 1655, 1736, 2926  $\text{cm}^{-1}$ . HRMS (ESI) calcd. for  $\text{C}_{25}\text{H}_{35}\text{NO}_4\text{SNa}$  ( $\text{M}+\text{Na}$ ) $^+$ : 468.2179, Found: 468.2182.

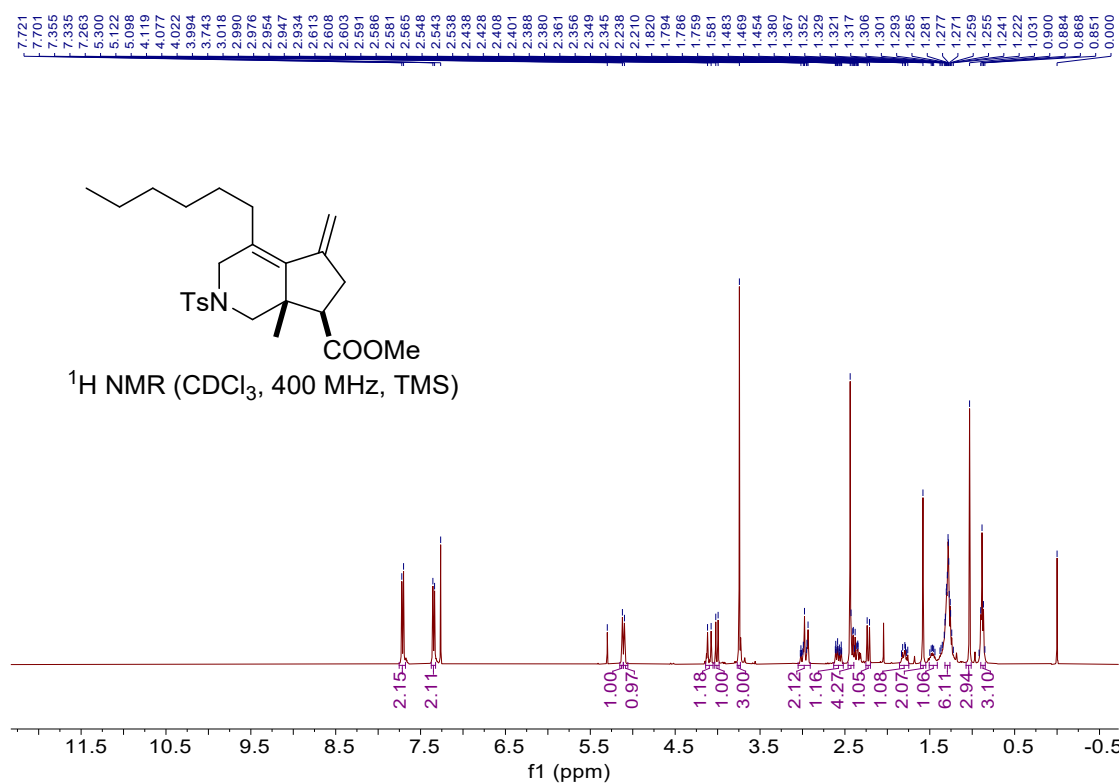



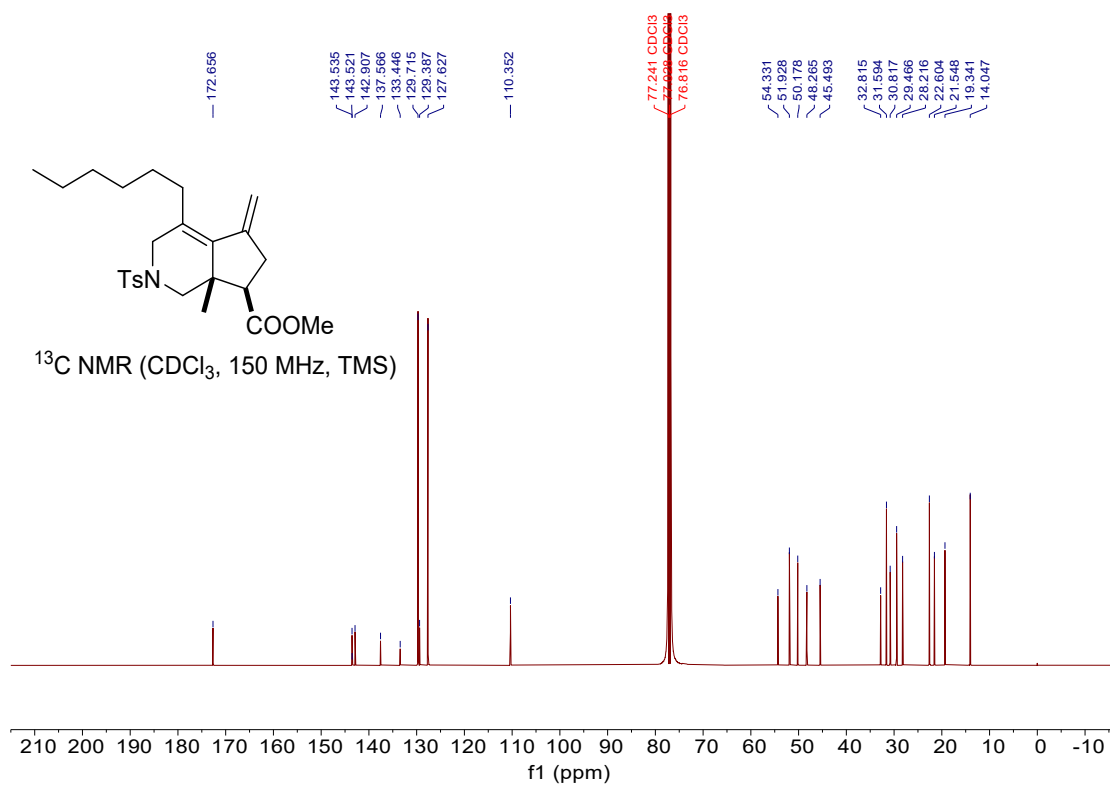

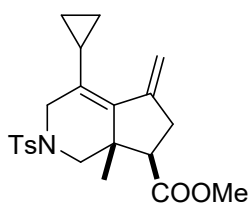

**(cis)-methyl-4-cyclopropyl-7a-methyl-5-methylene-2-tosyl-2,3,5,6,7,7a-hexahydro-1H-cyclopenta[c]pyridine-7-carboxylate (2h)**

A colorless oil, 88% yield, 35.4 mg.  $^1\text{H}$  NMR (400 MHz,  $\text{CDCl}_3$ )  $\delta$  7.69 (d,  $J = 8.0$  Hz, 2H), 7.35 (d,  $J = 8.0$  Hz, 2H), 5.45 (s, 1H), 5.23 (s, 1H), 4.00 (d,  $J = 11.2$  Hz, 1H), 3.74 (s, 3H), 3.01 (ddd,  $J = 17.2, 11.2, 2.8$  Hz, 1H), 2.91 (d,  $J = 16.8$  Hz, 1H), 2.66 – 2.54 (m, 1H), 2.44 (s, 3H), 2.20 (d,  $J = 11.2$  Hz, 1H), 1.71 (h,  $J = 6.4$  Hz, 1H), 1.56 (s, 3H), 1.03 (s, 3H), 0.82 – 0.73 (m, 1H), 0.68 – 0.54 (m, 2H), 0.42 – 0.46 (m, 1H).  $^{13}\text{C}$  NMR (150 MHz,  $\text{CDCl}_3$ )  $\delta$  172.7, 143.6, 142.9, 139.7, 133.5, 129.8, 127.6, 127.1, 111.9, 54.1, 51.9, 50.1, 45.7, 45.5, 45.5, 32.7, 21.6, 19.3, 13.0, 6.7, 4.3. IR (neat)  $\nu$  660, 1346, 1651, 1736, 2923  $\text{cm}^{-1}$ . HRMS (ESI) calcd. for  $\text{C}_{22}\text{H}_{27}\text{NO}_4\text{SNa}$  ( $\text{M}+\text{Na}$ ) $^+$ : 424.1553, Found: 424.1554.

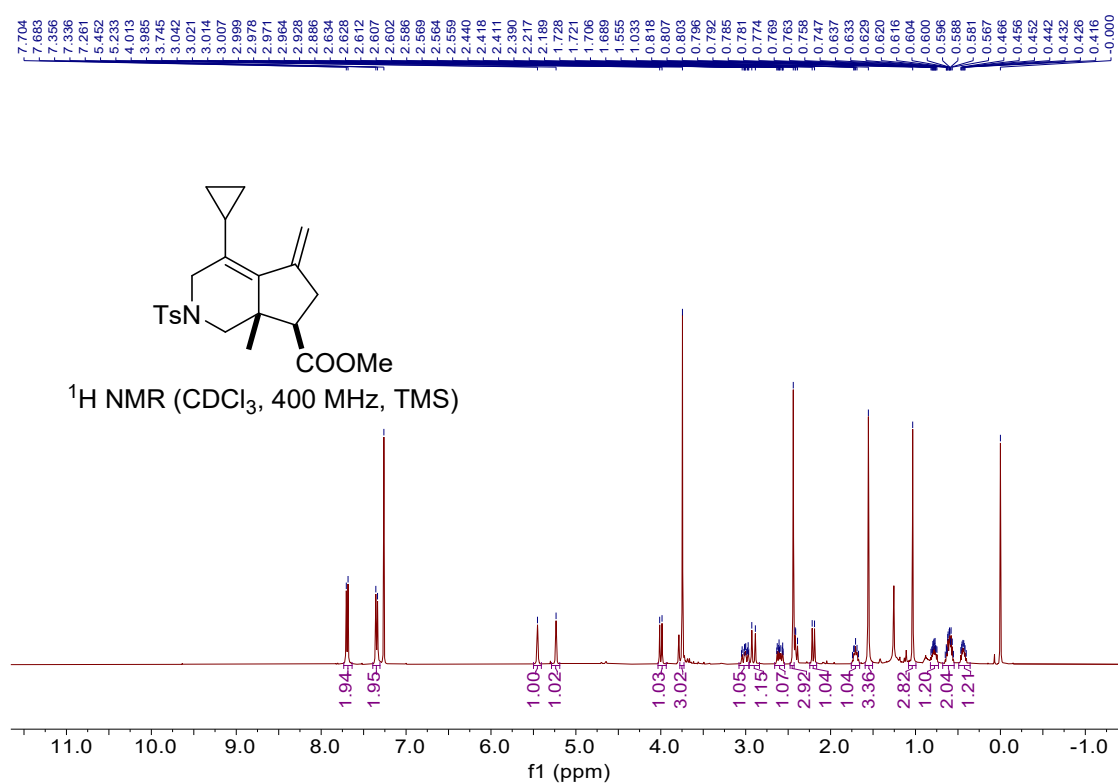

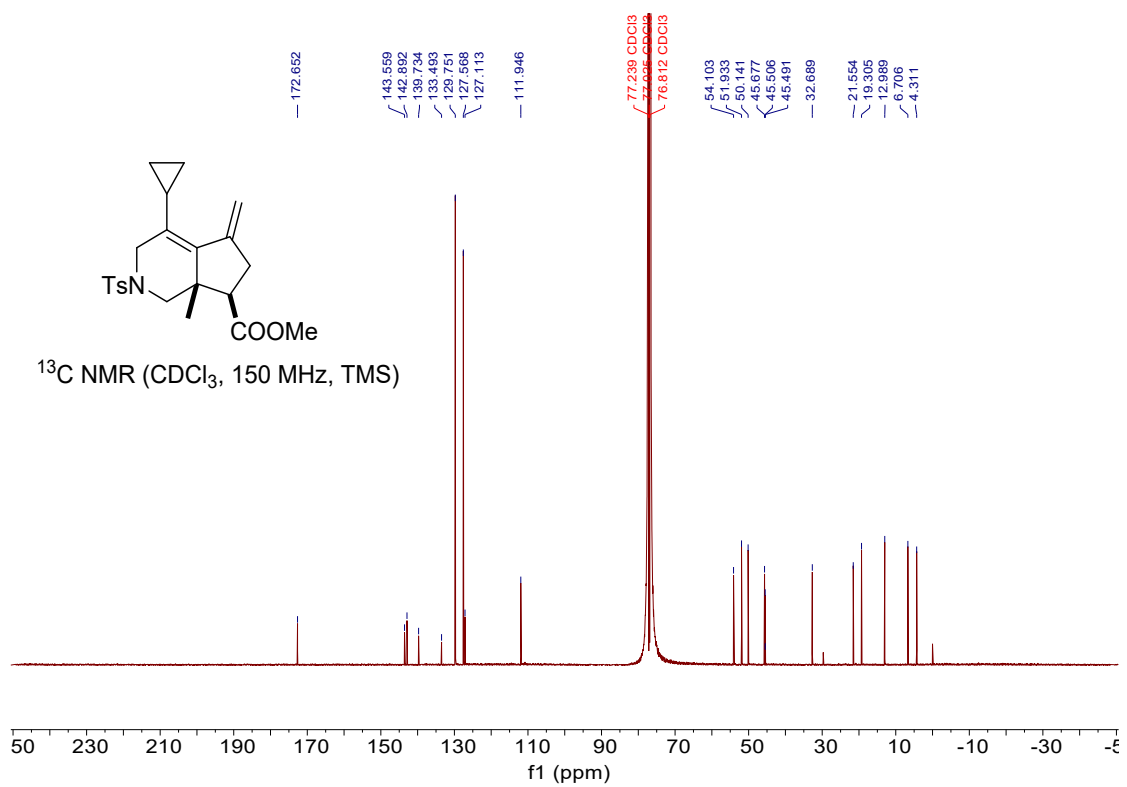

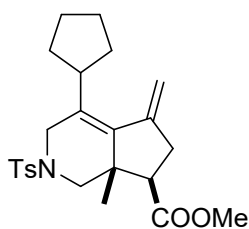

**(cis)-methyl-4-cyclopentyl-7a-methyl-5-methylene-2-tosyl-2,3,5,6,7,7a-hexahydro-1H-cyclopenta[c]pyridine-7-carboxylate (2i)**

A colorless oil, 90% yield, 38.6 mg.  $^1\text{H}$  NMR (600 MHz,  $\text{CDCl}_3$ )  $\delta$  7.70 (d,  $J = 8.0$  Hz, 2H), 7.35 (d,  $J = 8.0$  Hz, 2H), 5.19 – 5.10 (m, 2H), 4.03 (d,  $J = 16.4$  Hz, 1H), 3.98 (d,  $J = 11.2$  Hz, 1H), 3.74 (s, 3H), 3.16 – 3.10 (m, 1H), 3.07 (d,  $J = 16.4$  Hz, 1H), 3.01 – 2.93 (m, 1H), 2.63 – 2.56 (m, 1H), 2.46 – 2.41 (m, 4H), 2.20 (d,  $J = 11.2$  Hz, 1H), 1.86 – 1.79 (m, 1H), 1.73 – 1.60 (m, 3H), 1.55 – 1.39 (m, 3H), 1.36 – 1.29 (m, 1H), 1.03 (s, 3H).  $^{13}\text{C}$  NMR (100 MHz,  $\text{CDCl}_3$ )  $\delta$  172.7, 143.6, 142.9, 138.1, 133.4, 130.3, 129.7, 127.6, 110.7, 54.5, 50.0, 45.4, 44.8, 40.7, 32.5, 31.8, 29.6, 25.6, 24.6, 21.5, 19.4. IR (neat)  $\nu$  662, 1091, 1352, 1597, 1735, 2952  $\text{cm}^{-1}$ . HRMS (ESI) calcd. for  $\text{C}_{24}\text{H}_{31}\text{NO}_4\text{SNa}$  ( $\text{M}+\text{Na}$ ) $^+$ : 452.1866, Found: 452.1866.

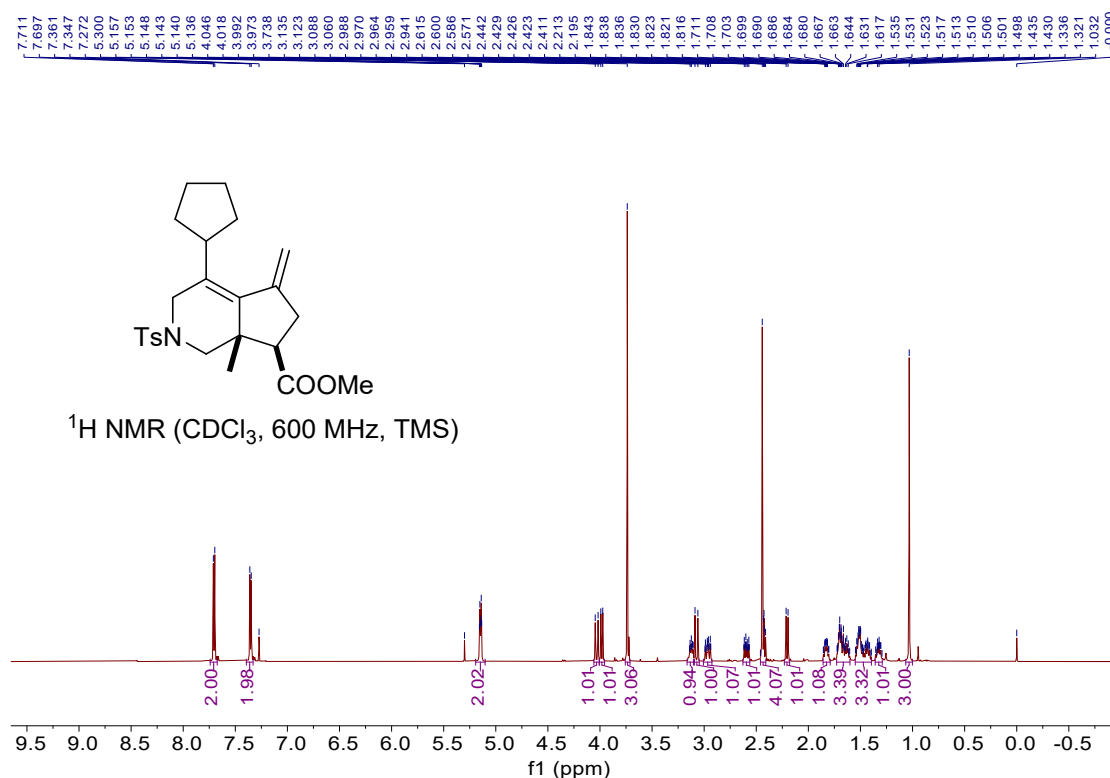

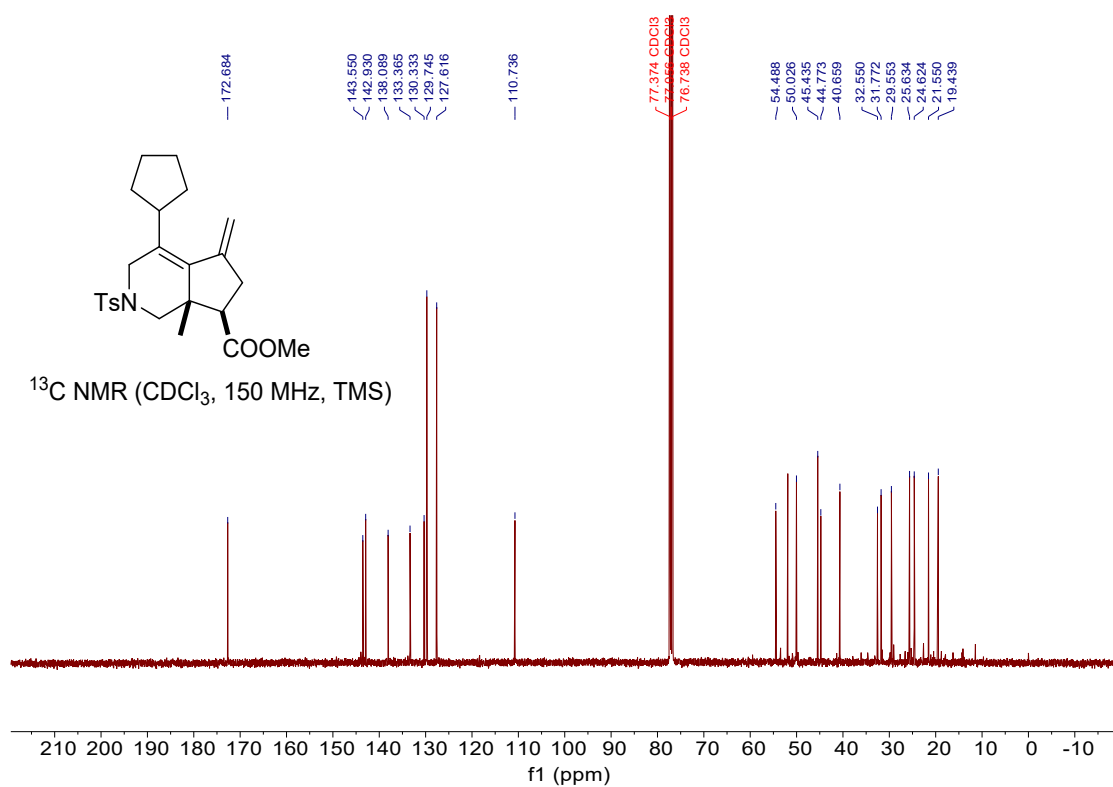

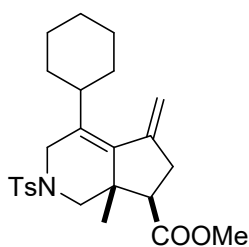

**(cis)-methyl-4-cyclopentyl-7a-methyl-5-methylene-2-tosyl-2,3,5,6,7,7a-hexahydro-1H-cyclopenta[c]pyridine-7-carboxylate (2j)**

A colorless oil, 92% yield, 40.7 mg.  $^1\text{H}$  NMR (400 MHz,  $\text{CDCl}_3$ )  $\delta$  7.71 (d,  $J = 8.0$  Hz, 2H), 7.35 (d,  $J = 8.0$  Hz, 2H), 5.16 (s, 1H), 5.06 (s, 1H), 4.07 (d,  $J = 16.8$  Hz, 1H), 3.97 (d,  $J = 11.2$  Hz, 1H), 3.74 (s, 3H), 3.04 (d,  $J = 16.8$  Hz, 1H), 2.99 – 2.89 (m, 1H), 2.78 – 2.67 (m, 1H), 2.65 – 2.54 (m, 1H), 2.47 – 2.41 (m, 4H), 2.17 (d,  $J = 11.2$  Hz, 1H), 1.83 – 1.59 (m, 4H), 1.49 – 1.12 (m, 6H), 1.02 (s, 3H).  $^{13}\text{C}$  NMR (150 MHz,  $\text{CDCl}_3$ )  $\delta$  172.7, 143.5, 142.8, 136.7, 133.5, 133.4, 129.7, 127.6, 111.0, 54.4, 51.9, 50.0, 45.4, 45.0, 39.2, 32.8, 31.9, 30.0, 26.6, 26.0, 25.9, 21.6, 19.4. IR (neat)  $\nu$  661, 1089, 1356, 1661, 1736, 2929  $\text{cm}^{-1}$ . HRMS (ESI) calcd. for  $\text{C}_{25}\text{H}_{33}\text{NO}_4\text{SNa}$  ( $\text{M}+\text{Na}$ ) $^+$ : 466.2023, Found: 466.2024.

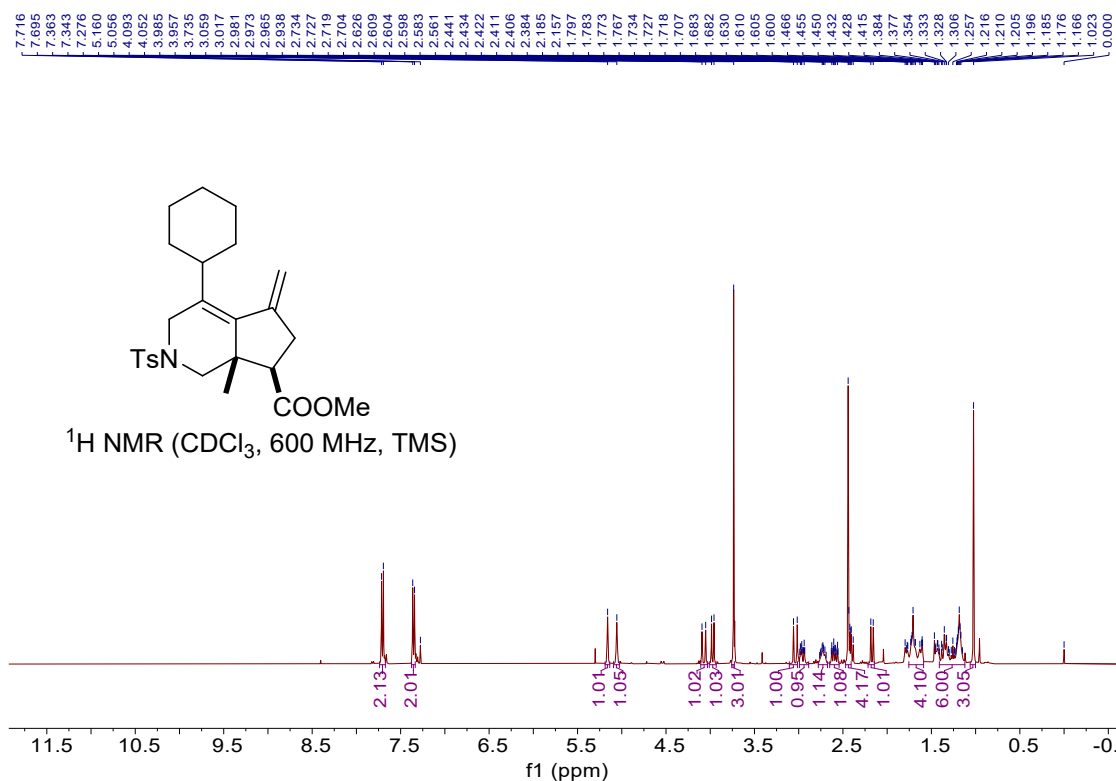

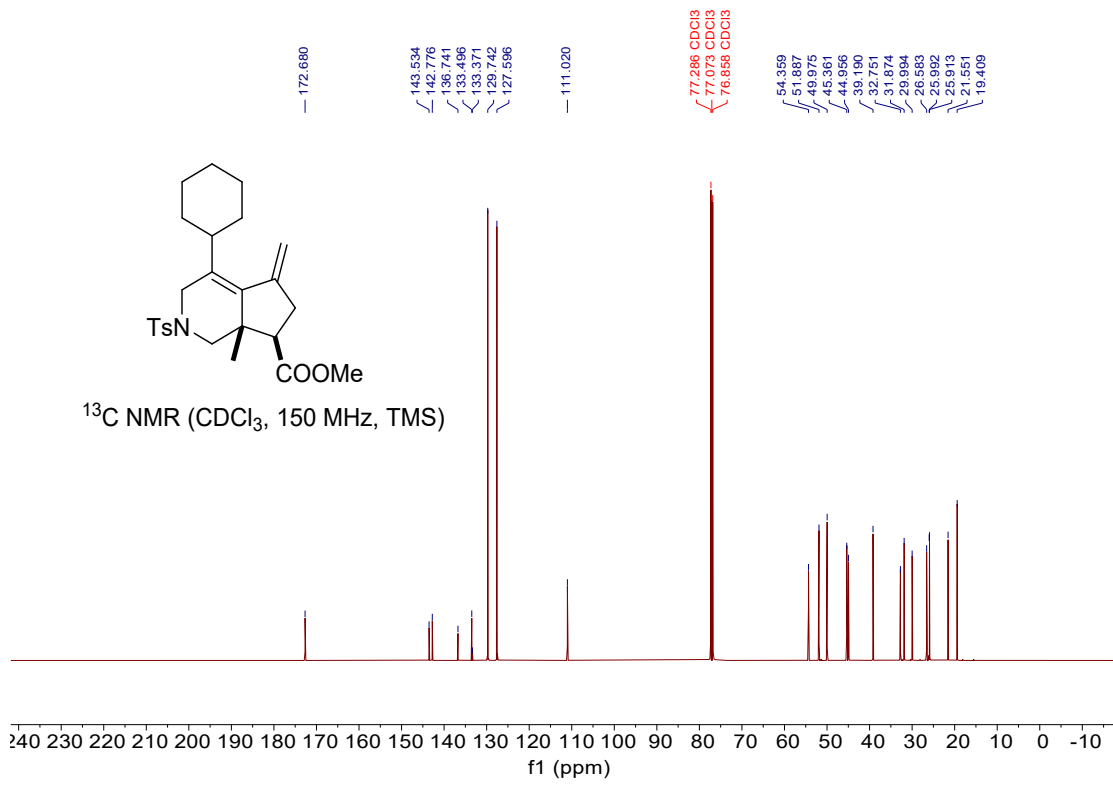

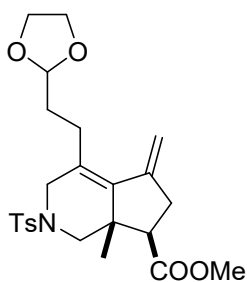

**(cis)-methyl-4-(2-(1,3-dioxolan-2-yl)ethyl)-7a-methyl-5-methylene-2-tosyl-2,3,5,6,7,7a-hexahydro-1H-cyclopenta[c]pyridine-7-carboxylate (2k)**

A colorless oil, 88% yield, 40.6 mg.  $^1\text{H}$  NMR (400 MHz,  $\text{CDCl}_3$ )  $\delta$  7.71 (d,  $J = 8.0$  Hz, 2H), 7.34 (d,  $J = 8.0$  Hz, 2H), 5.25 (s, 1H), 5.15 (s, 1H), 4.89 (t,  $J = 4.4$  Hz, 1H), 4.10 (d,  $J = 17.2$  Hz, 1H), 4.05 – 3.98 (m, 1H), 3.97 – 3.92 (m, 2H), 3.88 – 3.83 (m, 2H), 3.75 (s, 3H), 3.04 – 2.92 (m, 2H), 2.63 – 2.47 (m, 2H), 2.46 – 2.38 (m, 4H), 2.23 (d,  $J = 11.2$  Hz, 1H), 2.03 – 1.92 (m, 1H), 1.89 – 1.80 (m, 1H), 1.79 – 1.70 (m, 1H), 1.04 (s, 3H).  $^{13}\text{C}$  NMR (100 MHz,  $\text{CDCl}_3$ )  $\delta$  172.6, 143.6, 142.6, 138.2, 133.4, 129.7, 128.1, 127.6, 111.0, 103.7, 65.0, 54.2, 51.9, 50.1, 48.1, 45.6, 32.9, 31.9, 24.5, 21.5, 19.3. IR (neat)  $\nu$  664, 965, 1435, 1658, 1736, 2939  $\text{cm}^{-1}$ . HRMS (ESI) calcd. for  $\text{C}_{24}\text{H}_{31}\text{NO}_6\text{SNa}$  ( $\text{M}+\text{Na}$ ) $^+$ : 484.1764, Found: 484.1762.

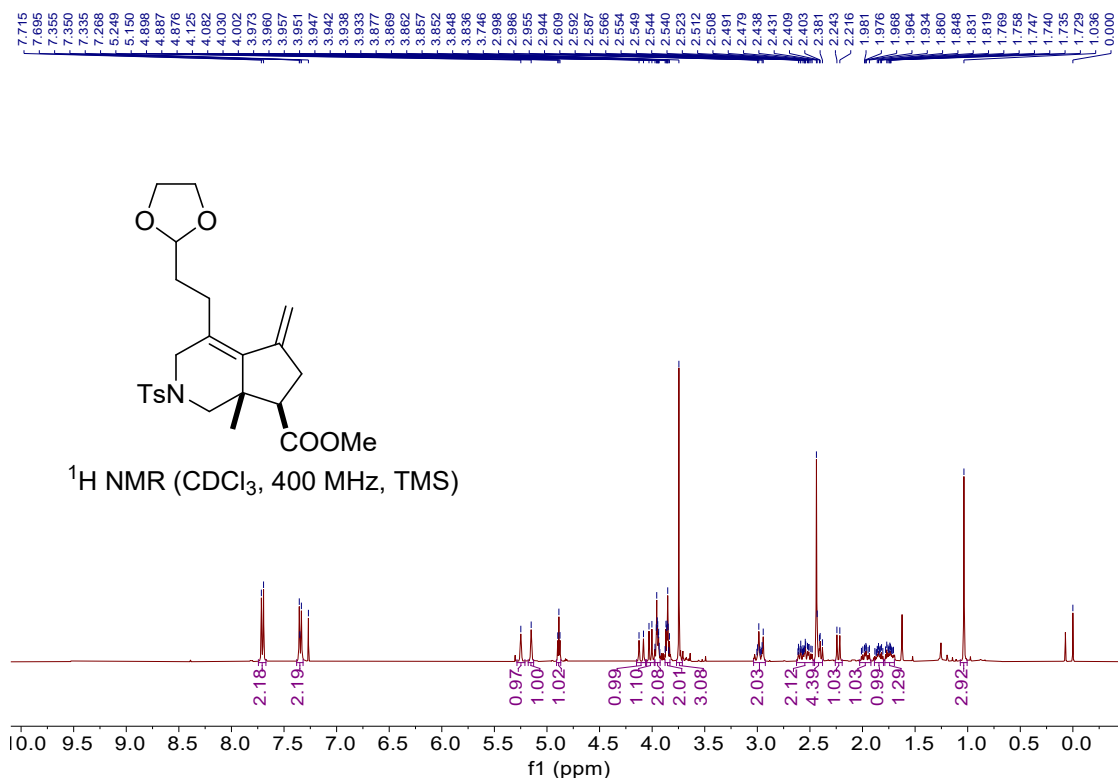



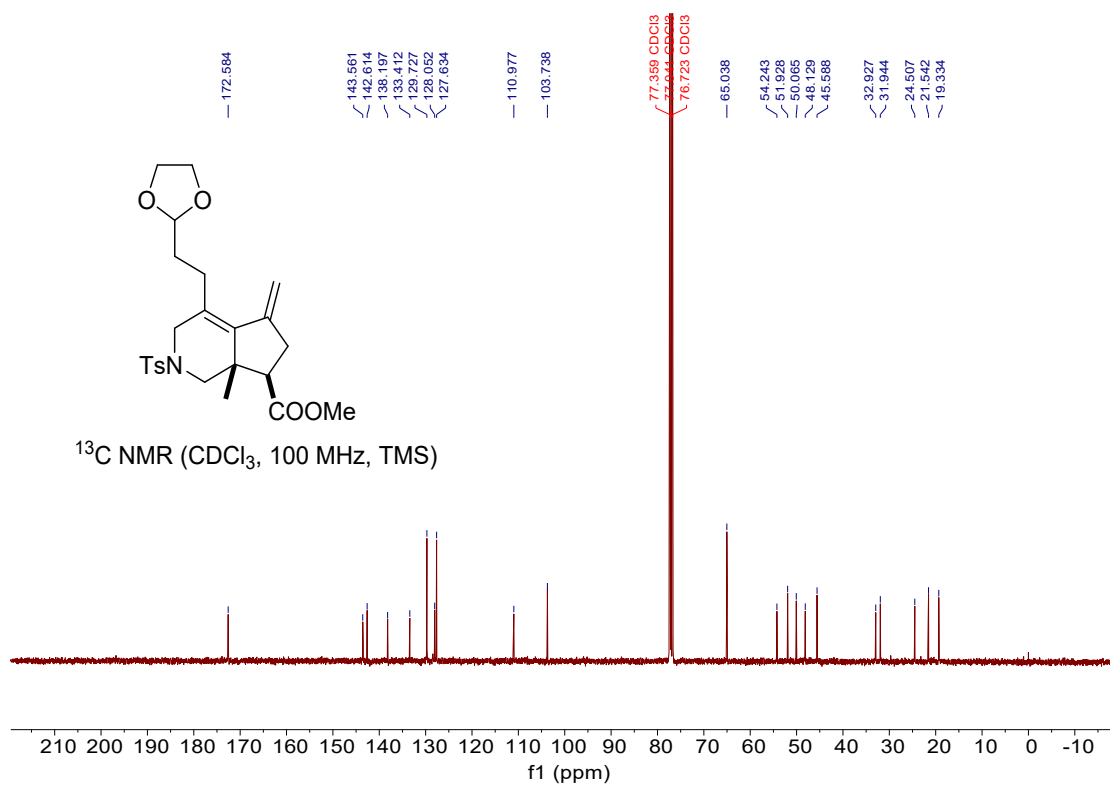

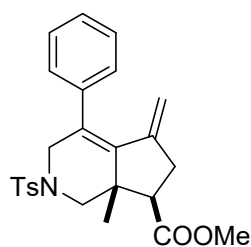

**(cis)-methyl-7a-methyl-5-methylene-4-phenyl-2-tosyl-2,3,5,6,7,7a-hexahydro-1H-cyclopenta[c]pyridine-7-carboxylate (2l)**

A colorless oil, 80% yield, 35.0 mg.  $^1\text{H NMR}$  (400 MHz,  $\text{CDCl}_3$ )  $\delta$  7.70 – 7.65 (m, 2H), 7.38 – 7.29 (m, 5H), 7.14 – 7.08 (m, 2H), 4.82 – 4.74 (m, 1H), 4.34 – 4.24 (m, 2H), 4.14 (d,  $J = 11.2$  Hz, 1H), 3.78 (s, 3H), 3.15 (d,  $J = 17.6$  Hz, 1H), 3.01 – 2.88 (m, 1H), 2.61 – 2.47 (m, 2H), 2.46 – 2.35 (m, 4H), 1.16 (s, 3H).  $^{13}\text{C NMR}$  (100 MHz,  $\text{CDCl}_3$ )  $\delta$  172.5, 143.6, 141.6, 139.2, 138.2, 133.6, 129.8, 128.9, 128.5, 128.4, 127.8, 127.6, 111.8, 54.0, 52.0, 50.0, 49.9, 45.7, 32.7, 21.5, 19.3. IR (neat)  $\nu$  662, 1208, 1349, 1662, 1734, 2948  $\text{cm}^{-1}$ . HRMS (ESI) calcd. for  $\text{C}_{25}\text{H}_{27}\text{NO}_4\text{SNa}$  ( $\text{M}+\text{Na}$ ) $^+$ : 460.1553, Found: 460.1550.

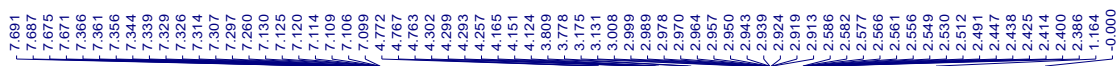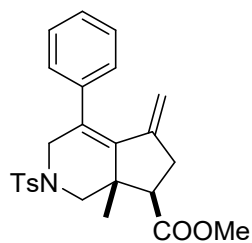

$^1\text{H NMR}$  ( $\text{CDCl}_3$ , 400 MHz, TMS)

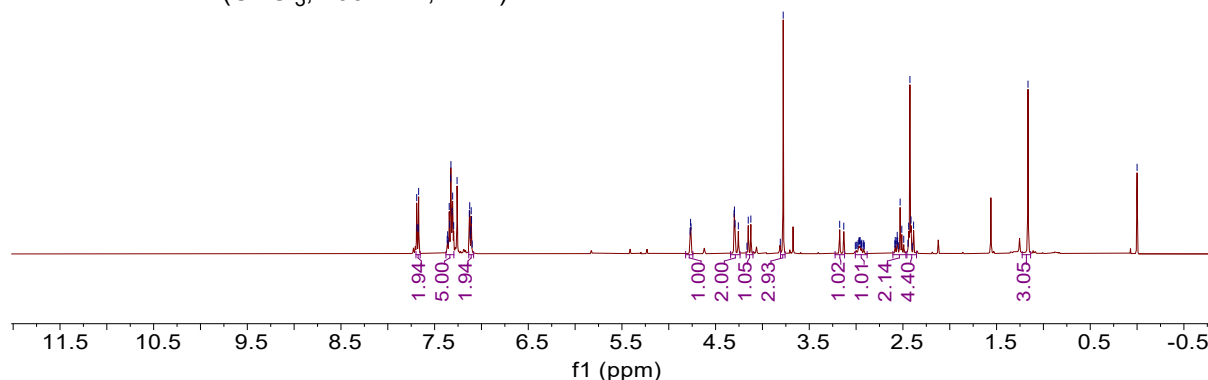

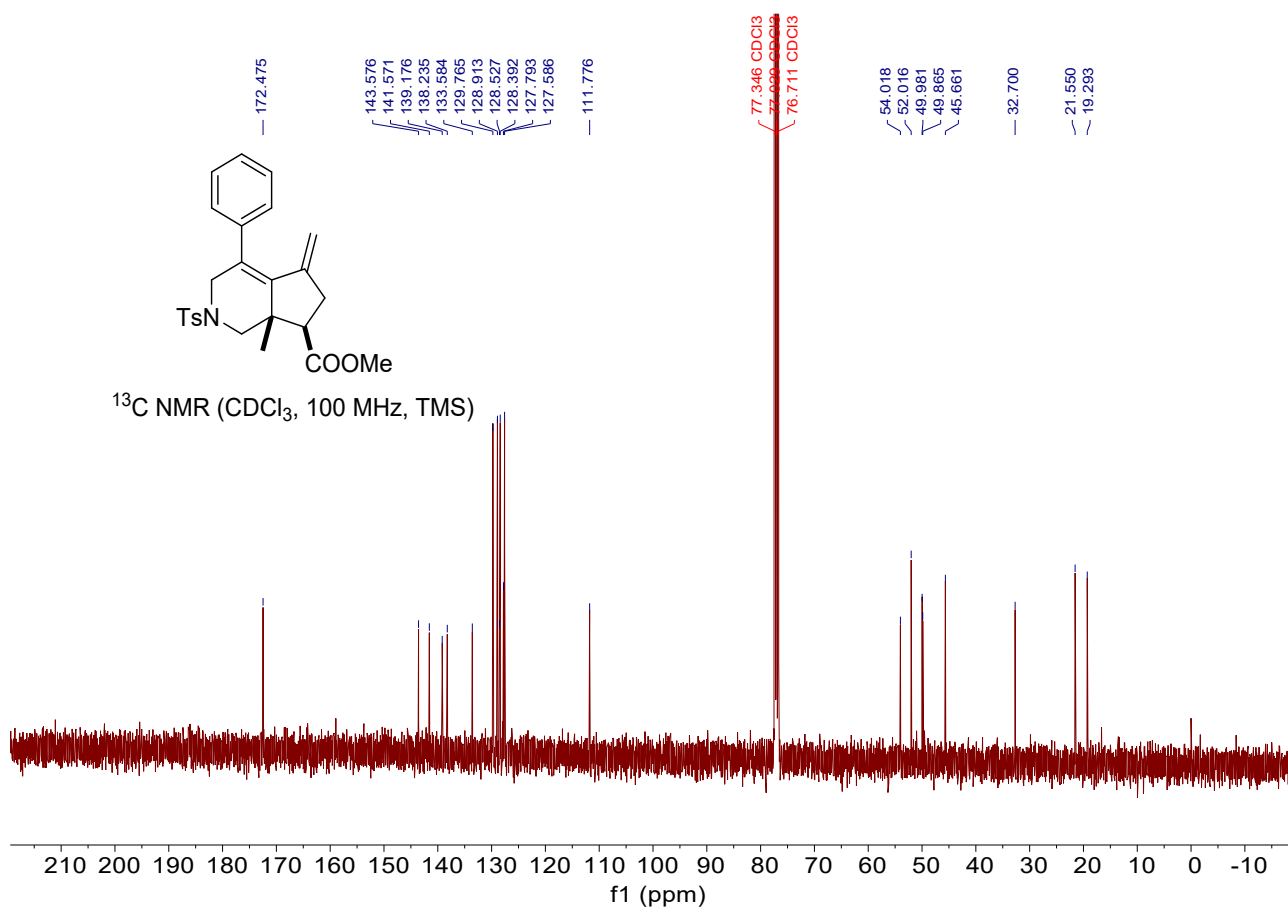

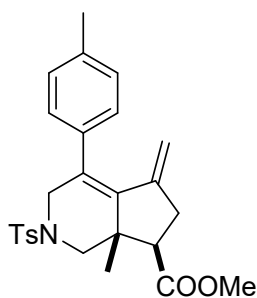

**(cis)-methyl-7a-methyl-5-methylene-4-(p-tolyl)-2-tosyl-2,3,5,6,7,7a-hexahydro-1H-cyclopenta[c]pyridine-7-carboxylate (2m)**

A colorless oil, 80% yield, 36.1 mg.  $^1\text{H}$  NMR (400 MHz,  $\text{CDCl}_3$ )  $\delta$  7.67 (d,  $J = 8.0$  Hz, 2H), 7.31 (d,  $J = 8.0$  Hz, 2H), 7.15 (d,  $J = 8.0$  Hz, 2H), 7.00 (d,  $J = 8.0$  Hz, 2H), 4.77 (s, 1H), 4.35 (s, 1H), 4.26 (d,  $J = 17.4$  Hz, 1H), 4.13 (d,  $J = 11.2$  Hz, 1H), 3.77 (d,  $J = 2.4$  Hz, 3H), 3.12 (d,  $J = 17.4$  Hz, 1H), 3.00 – 2.90 (m, 1H), 2.58 – 2.47 (m, 2H), 2.42 (s, 3H), 2.38 (d,  $J = 11.2$  Hz, 1H), 2.34 (s, 3H), 1.15 (s, 3H).  $^{13}\text{C}$  NMR (150 MHz,  $\text{CDCl}_3$ )  $\delta$  172.5, 143.5, 141.7, 139.0, 137.6, 135.2, 133.5, 129.7, 129.6, 128.2, 127.6, 111.6, 54.0, 52.0, 50.0, 49.9, 49.8, 45.7, 32.7, 29.7, 21.6, 21.2, 19.3. IR (neat)  $\nu$  661, 816, 1093, 1348, 1660, 1736, 2922  $\text{cm}^{-1}$ . HRMS (ESI) calcd. for  $\text{C}_{26}\text{H}_{29}\text{NO}_4\text{SNa}$  ( $\text{M}+\text{Na}$ ) $^+$ : 474.1710, Found: 474.1705.

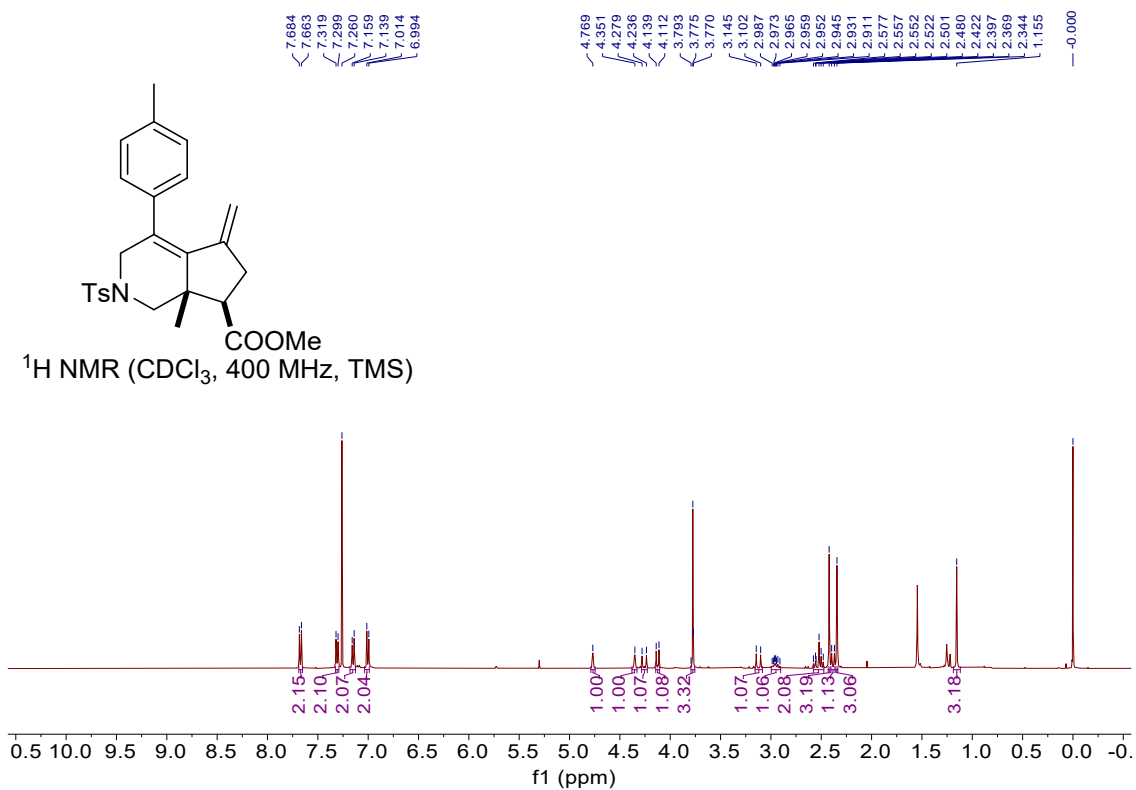

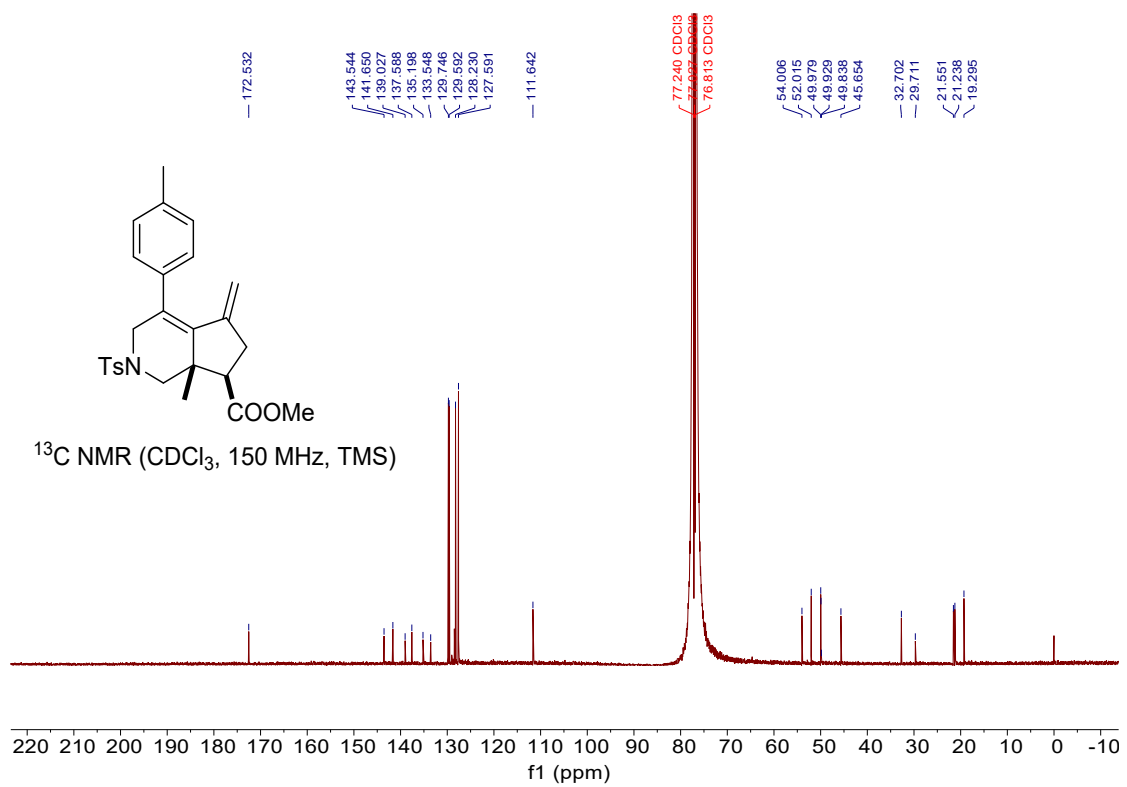

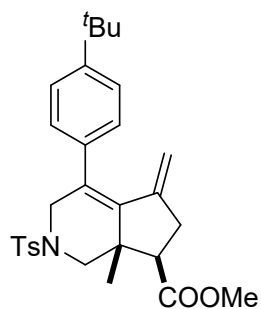

**(cis)-methyl-4-(4-(tert-butyl)phenyl)-7a-methyl-5-methylene-2-tosyl-2,3,5,6,7,7a-hexahydro-1H-cyclopenta[c]pyridine-7-carboxylate (2n)**

A colorless oil, 82% yield, 40.4 mg.  $^1\text{H}$  NMR (400 MHz,  $\text{CDCl}_3$ )  $\delta$  7.68 (d,  $J = 8.4$  Hz, 2H), 7.35 (d,  $J = 8.4$  Hz, 2H), 7.31 (d,  $J = 8.0$  Hz, 2H), 7.03 (d,  $J = 8.0$  Hz, 2H), 4.76 (s, 1H), 4.31 (s, 1H), 4.27 (d,  $J = 17.4$  Hz, 1H), 4.13 (d,  $J = 11.2$  Hz, 1H), 3.78 (s, 3H), 3.14 (d,  $J = 17.4$  Hz, 1H), 3.02 – 2.90 (m, 1H), 2.59 – 2.48 (m, 2H), 2.42 (s, 3H), 2.39 (d,  $J = 11.2$  Hz, 1H), 1.31 (s, 9H), 1.16 (s, 3H).  $^{13}\text{C}$  NMR (100 MHz,  $\text{CDCl}_3$ )  $\delta$  172.6, 150.9, 143.5, 141.6, 139.0, 133.4, 129.7, 128.5, 128.0, 127.6, 125.7, 111.6, 54.3, 52.0, 50.0, 49.9, 45.7, 34.6, 32.7, 31.3, 21.6, 19.3. IR (neat)  $\nu$  662, 1091, 1350, 1656, 1734, 2961  $\text{cm}^{-1}$ . HRMS (ESI) calcd. for  $\text{C}_{29}\text{H}_{35}\text{NO}_4\text{SNa}$  ( $\text{M}+\text{Na}$ ) $^+$ : 516.2179, Found: 516.2171.

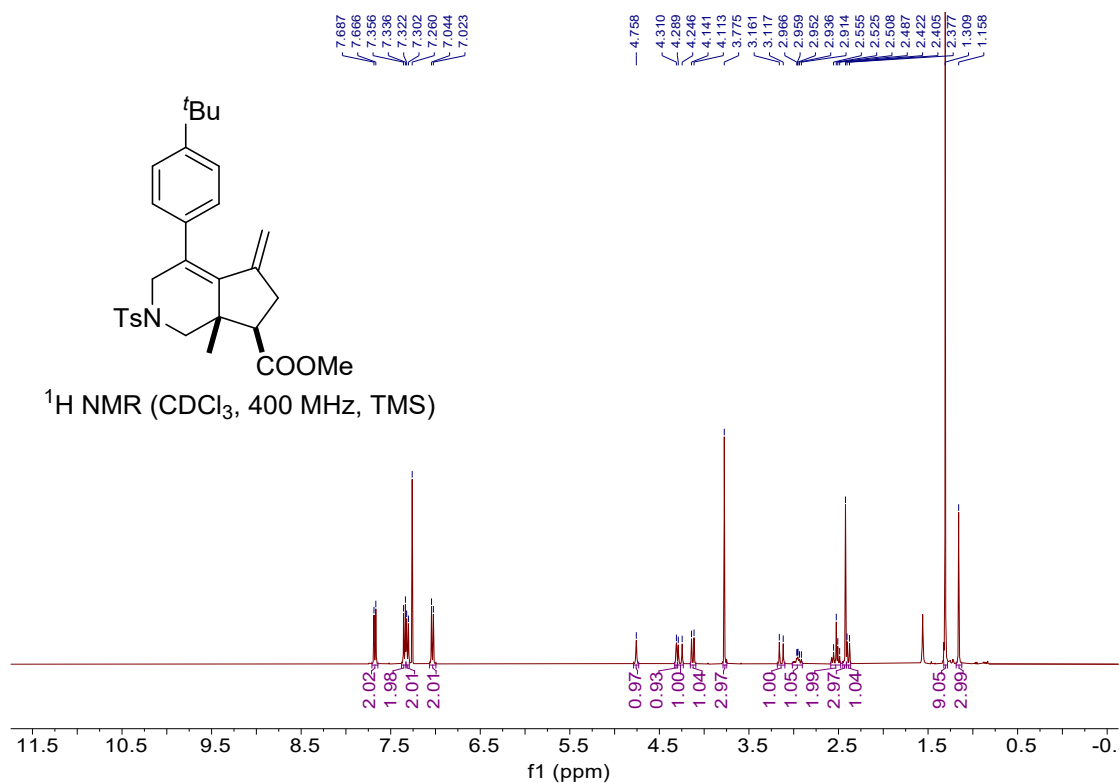

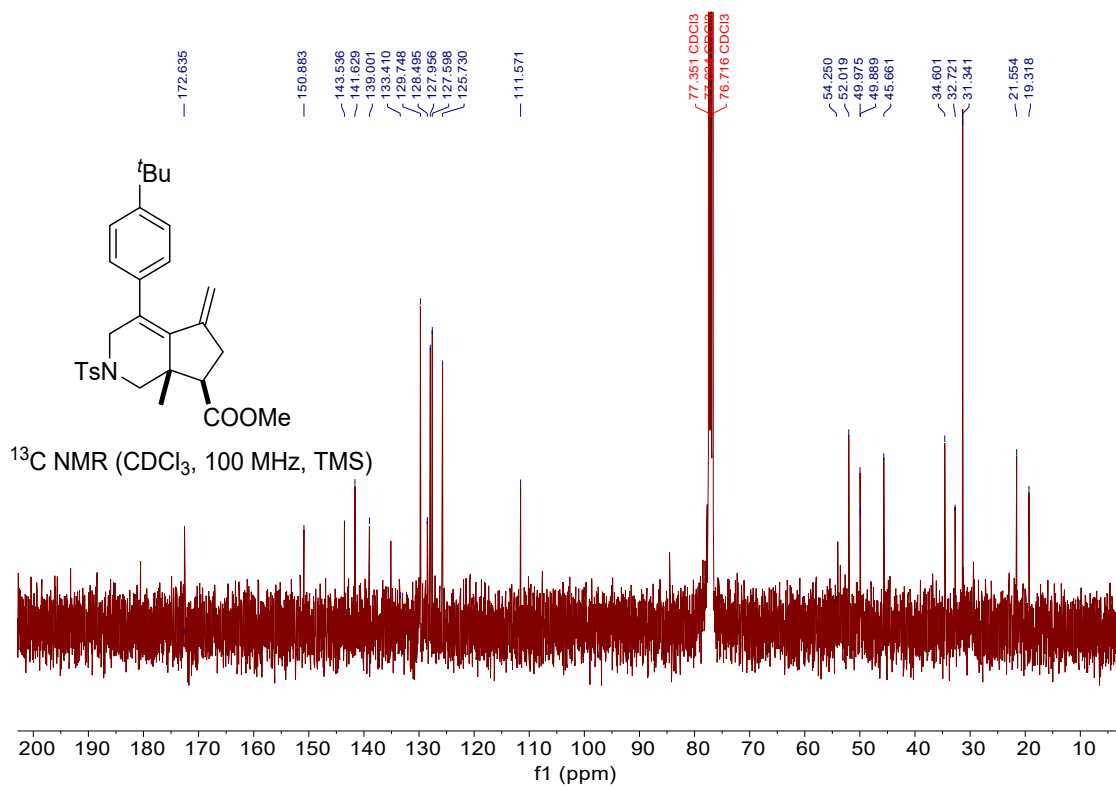

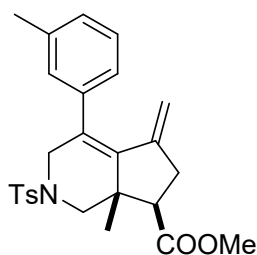

**(cis)-methyl-7a-methyl-5-methylene-4-(m-tolyl)-2-tosyl-2,3,5,6,7,7a-hexahydro-1H-cyclopenta[c]pyridine-7-carboxylate (2o)**

A colorless oil, 84% yield, 37.9 mg.  $^1\text{H}$  NMR (400 MHz,  $\text{CDCl}_3$ )  $\delta$  7.68 (d,  $J = 8.2$  Hz, 2H), 7.32 (d,  $J = 8.0$  Hz, 2H), 7.22 (t,  $J = 7.6$  Hz, 1H), 7.11 (d,  $J = 7.6$  Hz, 1H), 6.94 (s, 1H), 6.90 (d,  $J = 7.6$  Hz, 1H), 4.80 – 4.72 (m, 1H), 4.33 (d,  $J = 3.1$  Hz, 1H), 4.26 (d,  $J = 17.4$  Hz, 1H), 4.13 (d,  $J = 11.1$  Hz, 1H), 3.78 (s, 3H), 3.14 (d,  $J = 17.4$  Hz, 1H), 3.04 – 2.89 (m, 1H), 2.59 – 2.47 (m, 2H), 2.42 (d,  $J = 8.0$  Hz, 4H), 2.32 (s, 3H), 1.16 (s, 3H).  $^{13}\text{C}$  NMR (100 MHz,  $\text{CDCl}_3$ )  $\delta$  172.5, 143.6, 141.6, 138.9, 138.6, 138.2, 133.6, 129.8, 129.0, 128.8, 128.7, 128.5, 127.6, 125.3, 111.7, 54.0, 52.0, 50.0, 49.9, 45.6, 32.7, 21.6, 21.3, 19.3. IR (neat)  $\nu$  668, 1098, 1349, 1659, 1733, 2948  $\text{cm}^{-1}$ . HRMS (ESI) calcd. for  $\text{C}_{26}\text{H}_{29}\text{NO}_4\text{SNa}$  ( $\text{M}+\text{Na}$ ) $^+$ : 474.1710, Found: 474.1704.

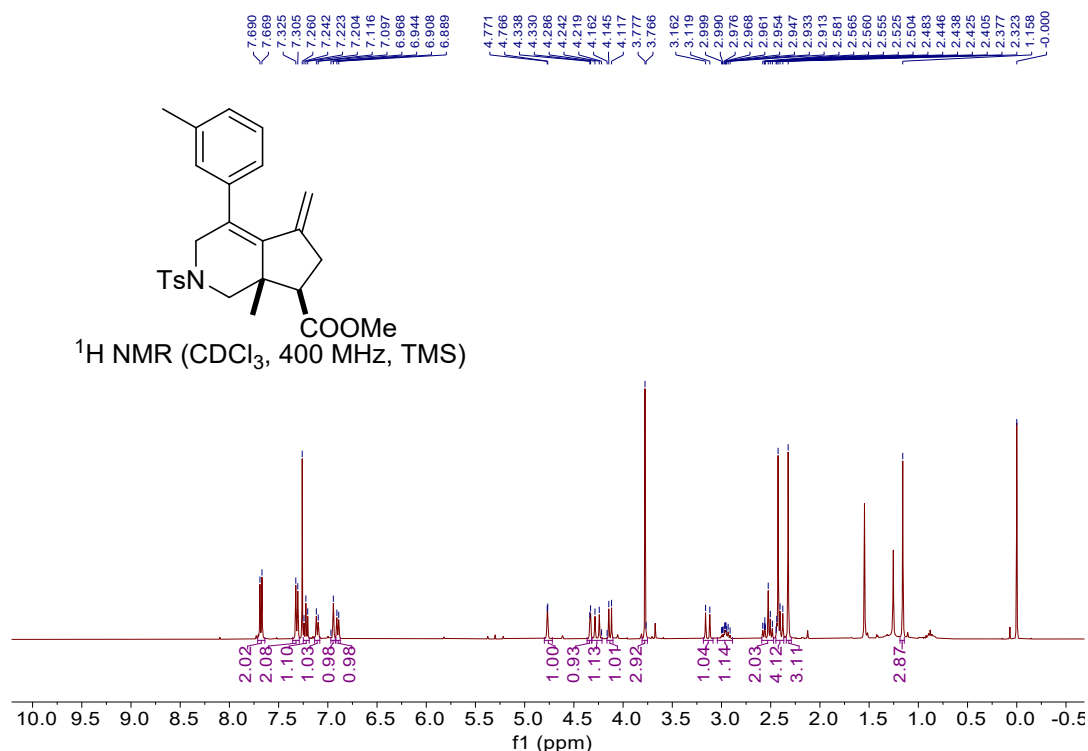



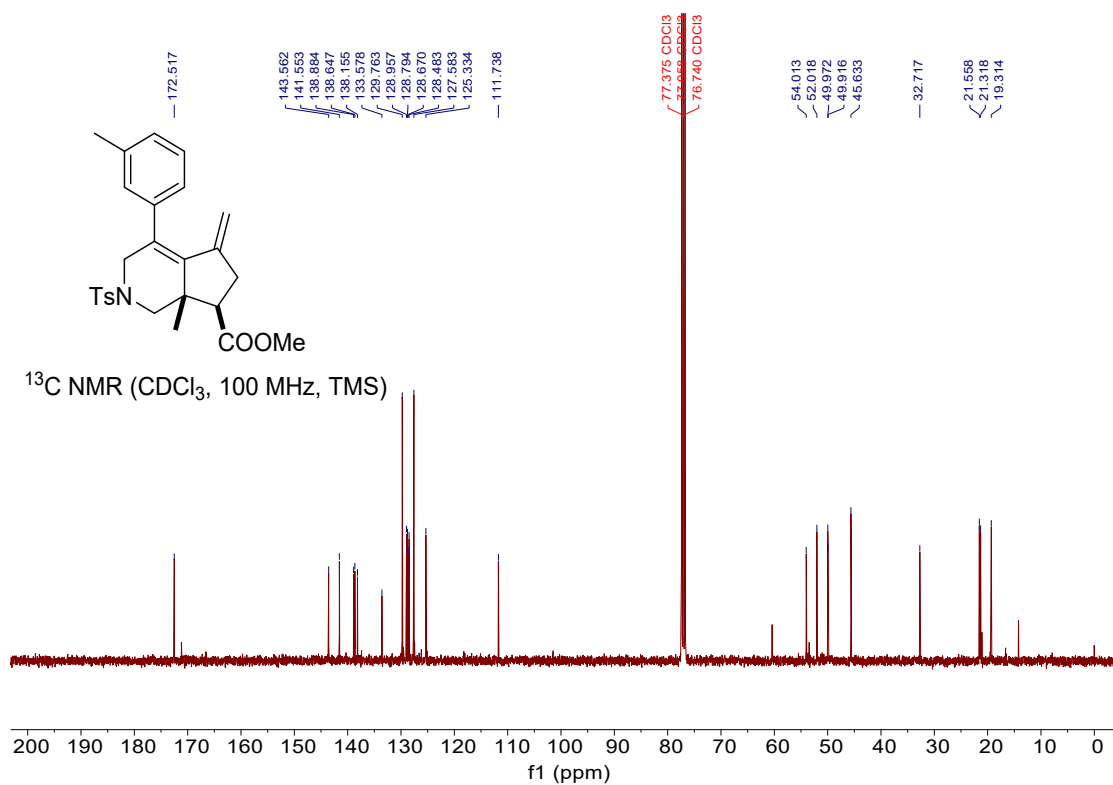

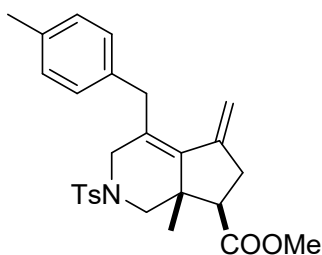

**(cis)-methyl-7a-methyl-5-methylene-4-(m-tolyl)-2-tosyl-2,3,5,6,7,7a-hexahydro-1H-cyclopenta[c]pyridine-7-carboxylate (2p)**

A colorless oil, 90% yield, 41.9 mg.  $^1\text{H}$  NMR (400 MHz,  $\text{CDCl}_3$ )  $\delta$  7.65 (d,  $J = 8.0$  Hz, 2H), 7.31 (d,  $J = 8.0$  Hz, 2H), 7.09 (d,  $J = 8.0$  Hz, 2H), 6.97 (d,  $J = 8.0$  Hz, 2H), 5.12 (s, 1H), 5.05 (s, 1H), 4.06 (d,  $J = 11.2$  Hz, 1H), 4.01 (d,  $J = 17.2$  Hz, 1H), 3.76 (s, 4H), 3.15 (d,  $J = 16.0$  Hz, 1H), 3.07 – 2.97 (m, 1H), 2.94 (d,  $J = 17.2$  Hz, 1H), 2.68 – 2.58 (m, 1H), 2.52 – 2.46 (m, 1H), 2.43 (s, 3H), 2.34 – 2.27 (m, 4H), 1.14 (s, 3H).  $^{13}\text{C}$  NMR (100 MHz,  $\text{CDCl}_3$ )  $\delta$  172.6, 143.5, 142.6, 140.4, 136.0, 134.7, 133.3, 129.7, 129.5, 127.7, 127.6, 126.2, 110.9, 54.4, 52.0, 50.2, 48.5, 45.7, 35.6, 32.5, 21.6, 21.0, 19.4. IR (neat)  $\nu$  661, 1020, 1349, 1597, 1736, 2921  $\text{cm}^{-1}$ . HRMS (ESI) calcd. for  $\text{C}_{27}\text{H}_{31}\text{NO}_4\text{SNa}$  ( $\text{M}+\text{Na}$ ) $^+$ : 488.1866, Found: 488.1872.

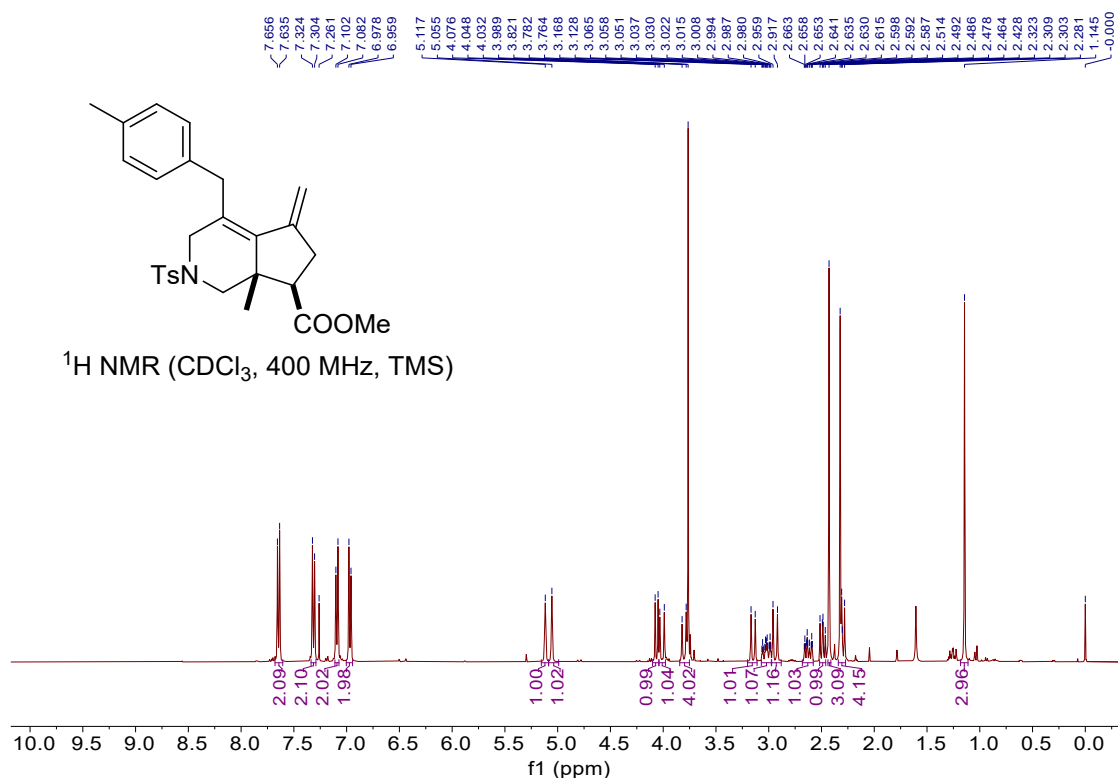

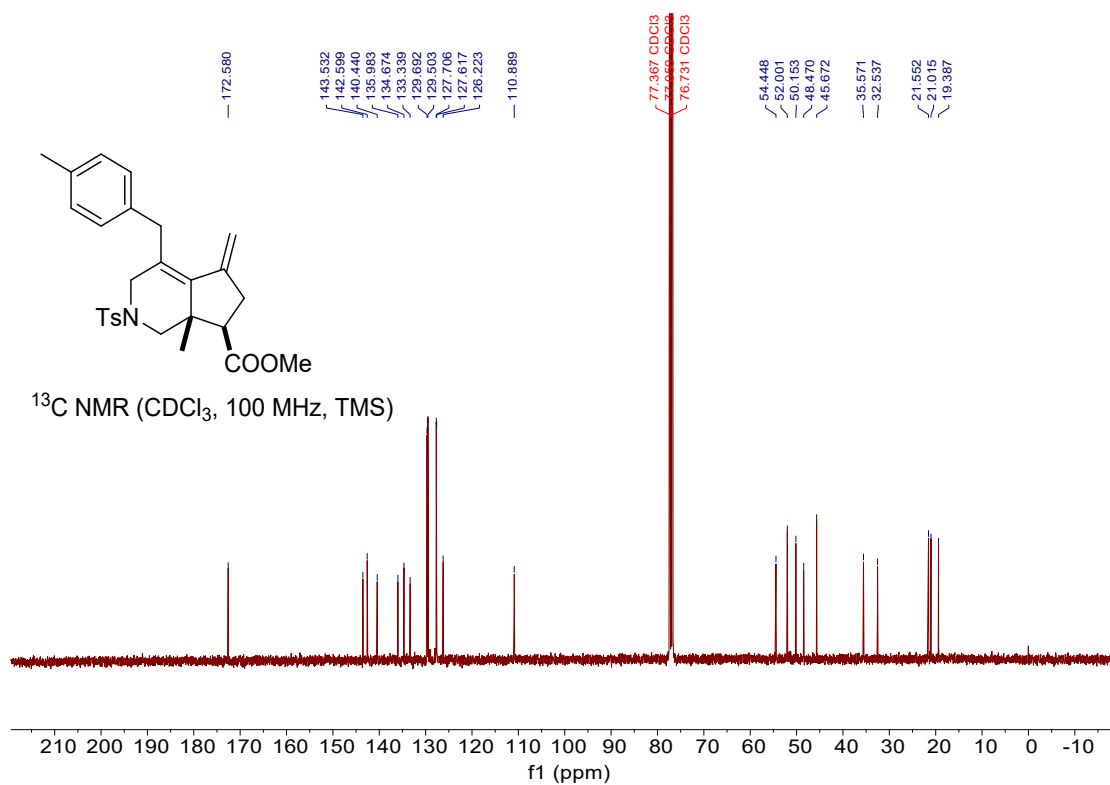

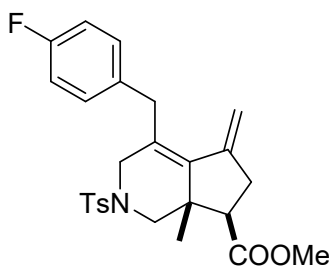

**(cis)-methyl-4-(4-fluorobenzyl)-7a-methyl-5-methylene-2-tosyl-2,3,5,6,7,7a-hexahydro-1H-cyclopenta[c]pyridine-7-carboxylate (2q)**

A colorless oil, 90% yield, 42.2 mg.  $^1\text{H}$  NMR (400 MHz,  $\text{CDCl}_3$ )  $\delta$  7.65 (d,  $J = 8.0$  Hz, 2H), 7.32 (d,  $J = 8.0$  Hz, 2H), 7.07 – 6.92 (m, 4H), 5.07 (q,  $J = 2.4$  Hz, 2H), 4.07 (d,  $J = 11.2$  Hz, 1H), 3.98 (d,  $J = 17.2$  Hz, 1H), 3.82 – 3.73 (m, 4H), 3.18 (d,  $J = 15.8$  Hz, 1H), 3.07 – 2.98 (m, 1H), 2.94 (d,  $J = 17.2$  Hz, 1H), 2.68 – 2.57 (m, 1H), 2.49 (dd,  $J = 11.2, 8.8$  Hz, 1H), 2.43 (s, 3H), 2.30 (d,  $J = 11.2$  Hz, 1H), 1.15 (s, 3H).  $^{13}\text{C}$  NMR (150 MHz,  $\text{CDCl}_3$ )  $\delta$  172.5, 161.6 (d,  $J_{\text{C-F}} = 243.2$  Hz), 143.6, 142.6, 140.8, 133.4 (d,  $J_{\text{C-F}} = 3.5$  Hz), 133.3, 129.7, 129.3 (d,  $J_{\text{C-F}} = 8.1$  Hz), 127.6, 125.8, 115.7 (d,  $J_{\text{C-F}} = 21.3$  Hz), 111.0, 0 54.4, 52.0, 50.1, 48.4, 45.7, 35.2, 32.5, 21.5, 19.4.  $^{19}\text{F}$  NMR (565 MHz,  $\text{CDCl}_3$ )  $\delta$  -116.62. IR (neat)  $\nu$  662, 815, 1091, 1220, 1437, 1661, 1735, 2947  $\text{cm}^{-1}$ . HRMS (ESI) calcd. for  $\text{C}_{26}\text{H}_{28}\text{NO}_4\text{FSNa}$  ( $\text{M}+\text{Na}$ ) $^+$ : 492.1615, Found: 492.1618.

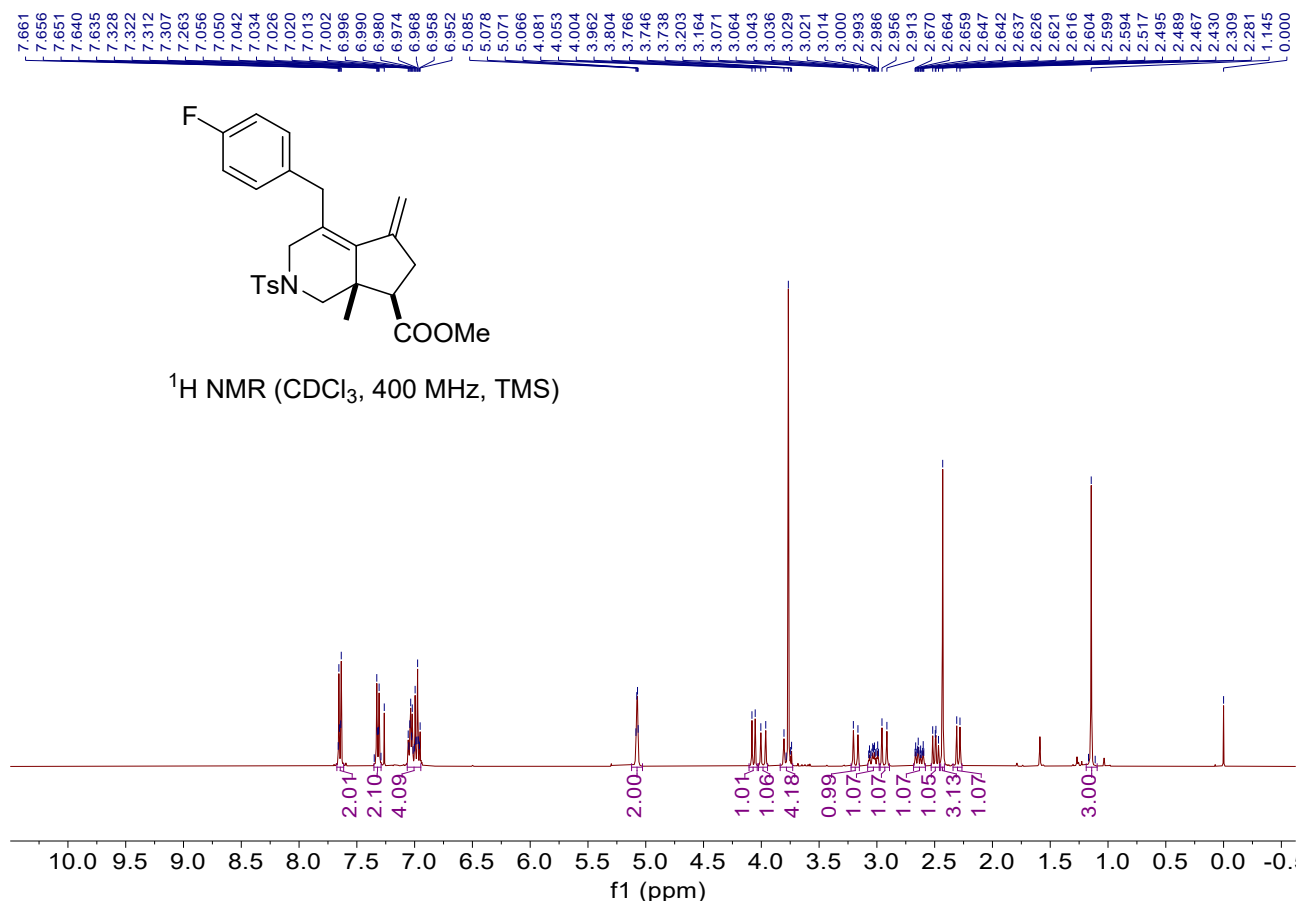

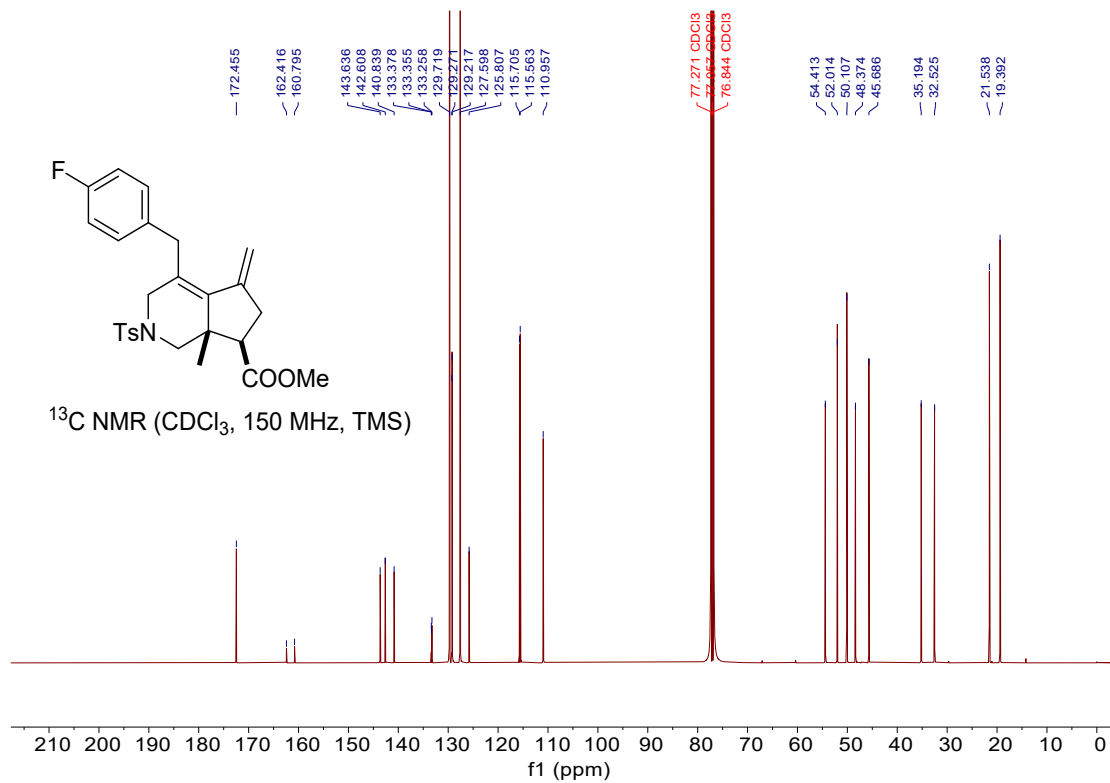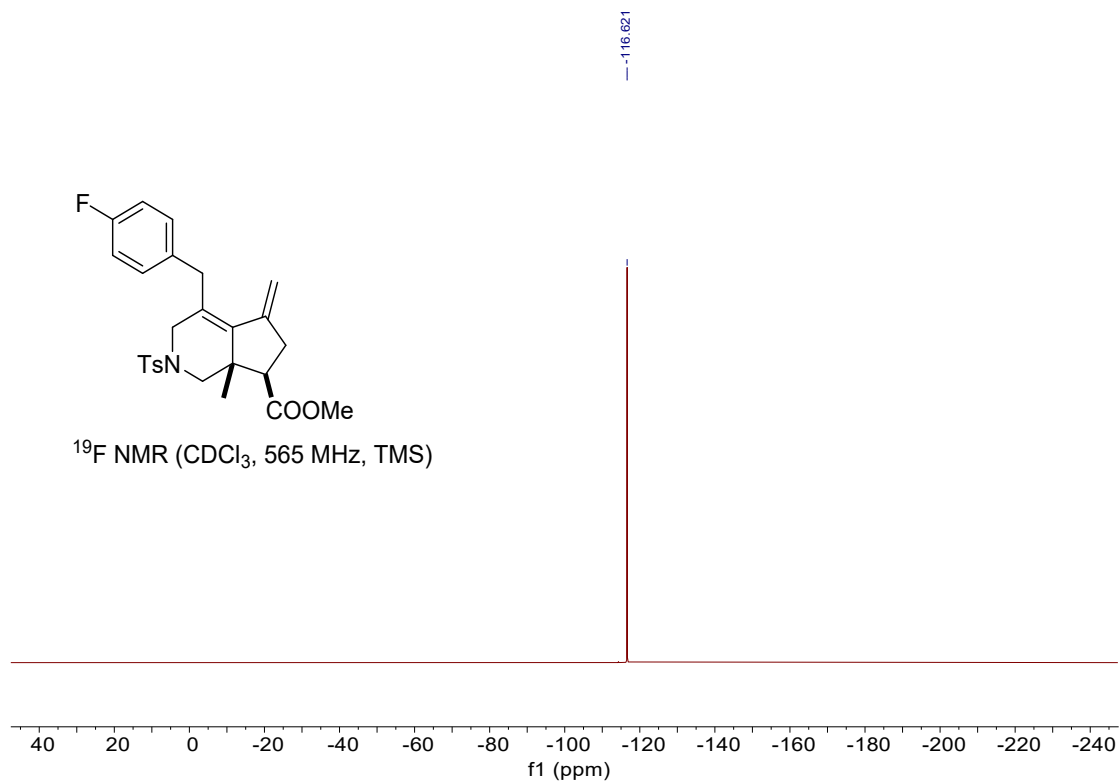

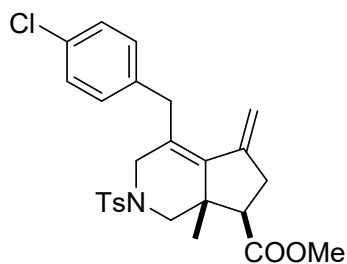

**(cis)-methyl-4-(4-chlorobenzyl)-7a-methyl-5-methylene-2-tosyl-2,3,5,6,7,7a-hexahydro-1H-cyclopenta[c]pyridine-7-carboxylate (2r)**

A yellow oil, 80% yield, 38.8 mg.  $^1\text{H}$  NMR (400 MHz,  $\text{CDCl}_3$ )  $\delta$  7.64 (d,  $J = 8.0$  Hz, 2H), 7.32 (d,  $J = 8.0$  Hz, 2H), 7.25 (d,  $J = 8.0$  Hz, 2H), 7.01 (d,  $J = 8.4$  Hz, 2H), 5.14 – 5.02 (m, 2H), 4.07 (d,  $J = 11.2$  Hz, 1H), 3.97 (d,  $J = 17.2$  Hz, 1H), 3.73 – 3.78 (m, 4H), 3.19 (d,  $J = 16.0$  Hz, 1H), 3.08 – 2.98 (m, 1H), 2.93 (d,  $J = 17.2$  Hz, 1H), 2.68 – 2.59 (m, 1H), 2.54 – 2.46 (m, 1H), 2.43 (s, 3H), 2.29 (d,  $J = 11.2$  Hz, 1H), 1.14 (s, 3H).  $^{13}\text{C}$  NMR (100 MHz,  $\text{CDCl}_3$ )  $\delta$  172.4, 143.7, 142.6, 141.1, 136.3, 133.2, 132.3, 129.7, 129.2, 129.0, 127.6, 125.4, 111.0, 54.4, 52.0, 50.1, 48.4, 45.7, 35.4, 32.5, 21.6, 19.4. IR (neat)  $\nu$  662, 1091, 1346, 1597, 1733, 2932  $\text{cm}^{-1}$ . HRMS (ESI) calcd. for  $\text{C}_{26}\text{H}_{28}\text{NO}_4\text{SClNa}$  ( $\text{M}+\text{Na}$ ) $^+$ : 508.1320, Found: 508.1327.

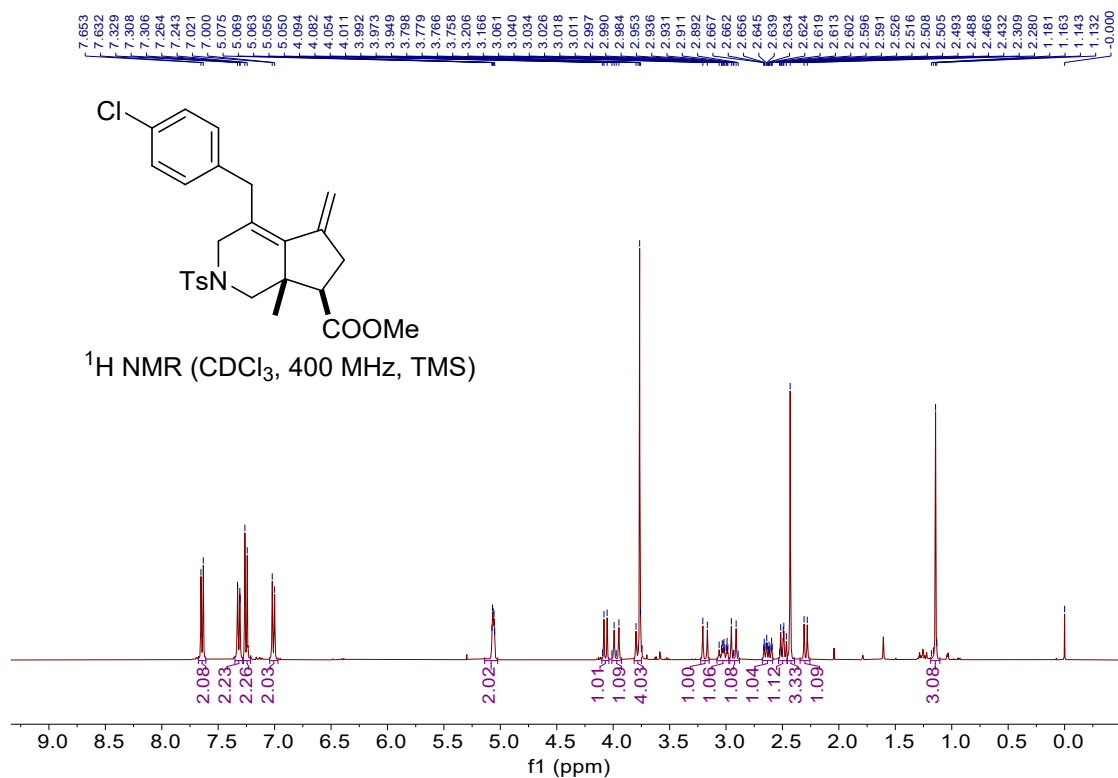

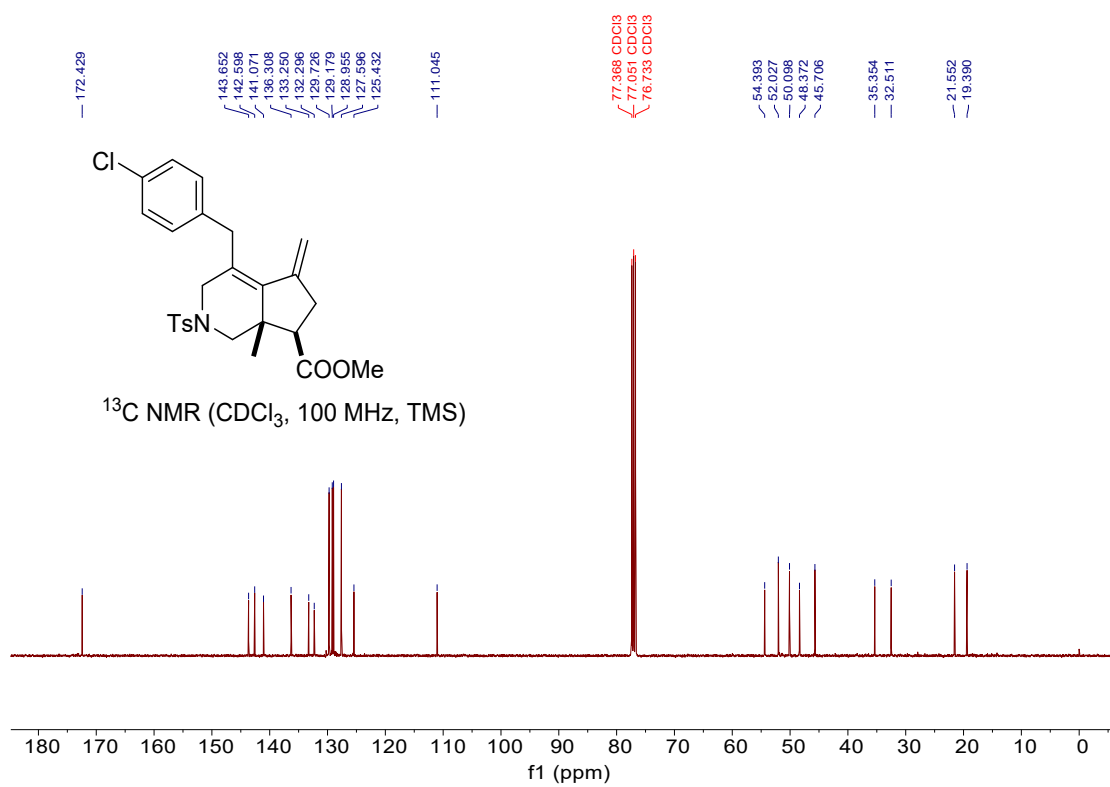

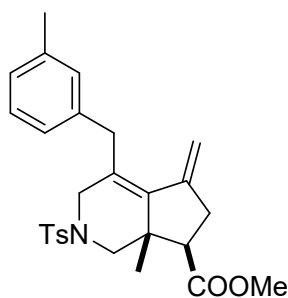

**(cis)-methyl-7a-methyl-4-(3-methylbenzyl)-5-methylene-2-tosyl-2,3,5,6,7,7a-hexahydro-1H-cyclopenta[c]pyridine-7-carboxylate (2s)**

A colorless oil, 92% yield, 42.8 mg.  $^1\text{H}$  NMR (400 MHz,  $\text{CDCl}_3$ )  $\delta$  7.64 (d,  $J = 8.1$  Hz, 2H), 7.31 (d,  $J = 8.0$  Hz, 2H), 7.16 (t,  $J = 7.5$  Hz, 1H), 7.02 (d,  $J = 7.7$  Hz, 1H), 6.87 (d,  $J = 9.0$  Hz, 2H), 5.13 (d,  $J = 2.6$  Hz, 1H), 5.06 (d,  $J = 2.2$  Hz, 1H), 4.10 – 3.97 (m, 2H), 3.84 – 3.72 (m, 4H), 3.17 (d,  $J = 15.9$  Hz, 1H), 3.08 – 2.90 (m, 2H), 2.68 – 2.58 (m, 1H), 2.49 (dd,  $J = 11.1, 8.9$  Hz, 1H), 2.42 (s, 3H), 2.31 (s, 3H), 1.15 (s, 3H).  $^{13}\text{C}$  NMR (100 MHz,  $\text{CDCl}_3$ )  $\delta$  172.5, 143.6, 141.6, 138.9, 138.6, 138.2, 133.6, 129.8, 129.0, 128.8, 128.7, 128.5, 127.6, 125.3, 111.7, 54.0, 52.0, 50.0, 49.9, 45.6, 32.7, 21.6, 21.3, 19.3. IR (neat)  $\nu$  662, 1091, 1330, 1598, 1735, 2852, 2924  $\text{cm}^{-1}$ . HRMS (ESI) calcd. for  $\text{C}_{27}\text{H}_{31}\text{NO}_4\text{SNa}$  ( $\text{M}+\text{Na}$ ) $^+$ : 488.1866, Found: 488.1862.

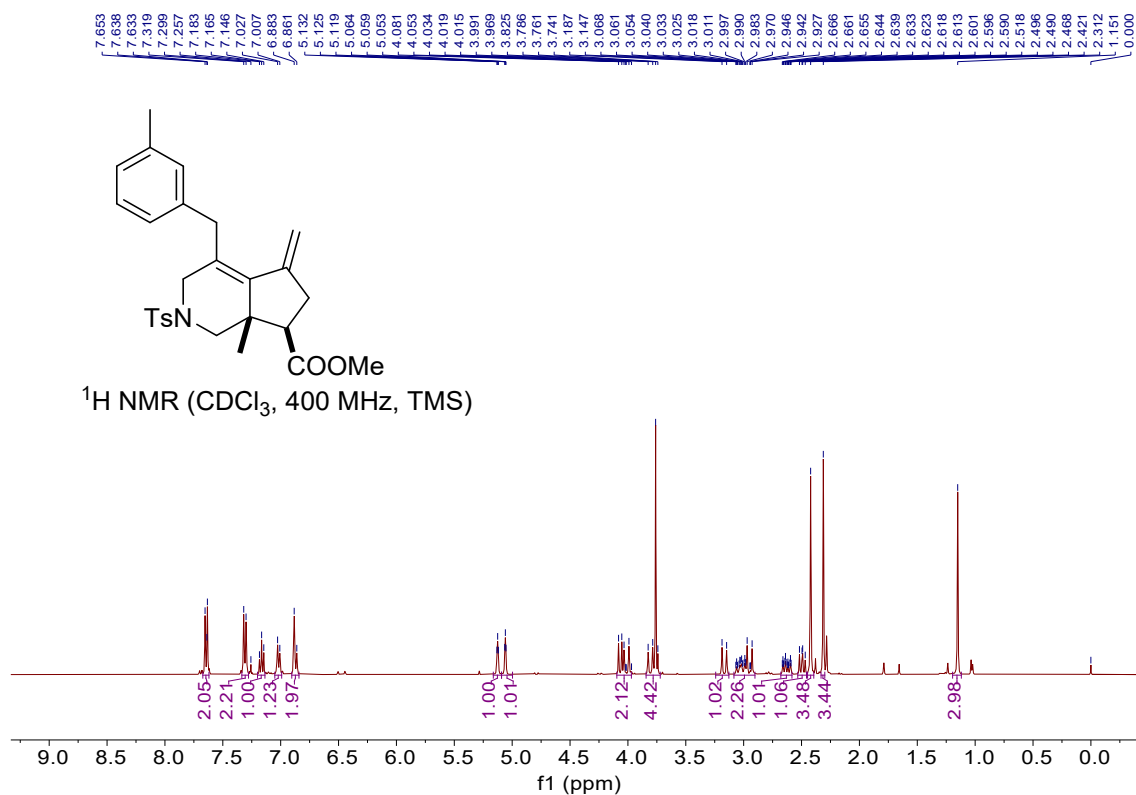



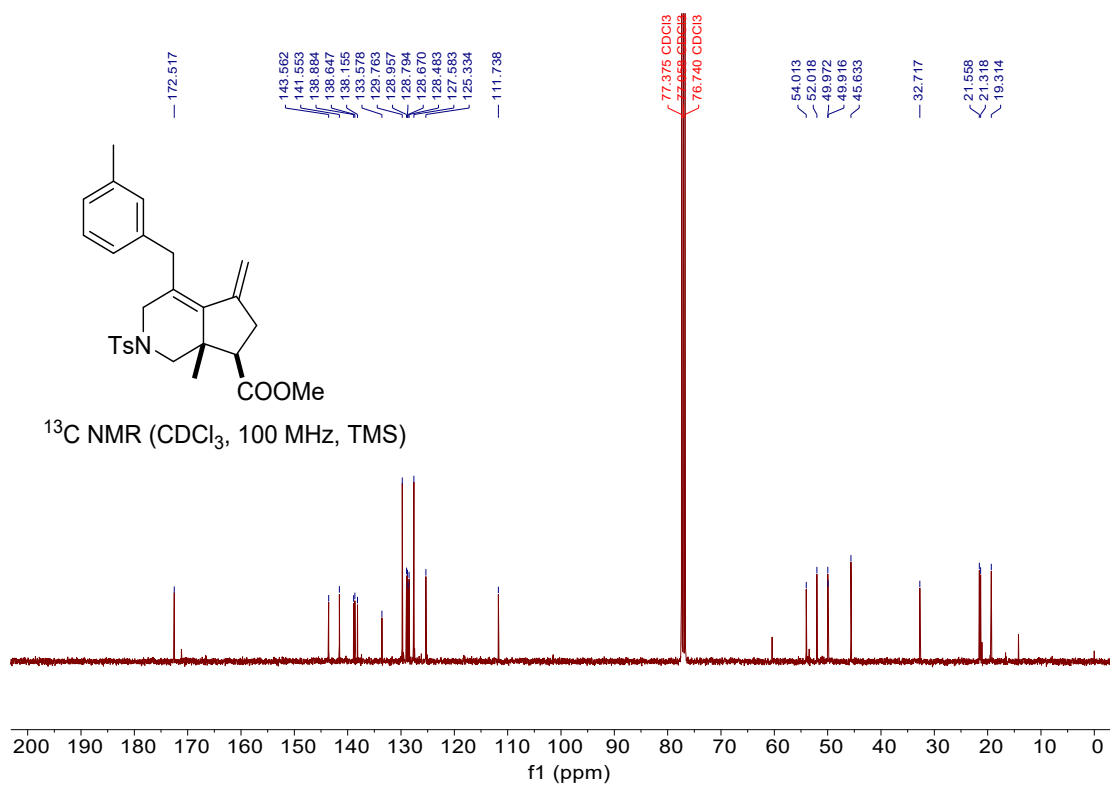

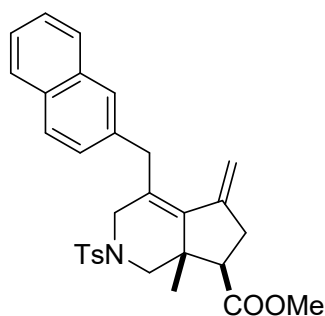

**(cis)-methyl-7a-methyl-5-methylene-4-(naphthalen-2-ylmethyl)-2-tosyl-2,3,5,6,7,7a-hexahydro-1H-cyclopenta[c]pyridine-7-carboxylate (2t)**

A colorless oil, 88% yield, 44.1 mg.  $^1\text{H}$  NMR (400 MHz,  $\text{CDCl}_3$ )  $\delta$  7.82 – 7.67 (m, 4H), 7.64 – 7.58 (m, 2H), 7.50 – 7.44 (m, 3H), 7.25 – 7.20 (m, 2H), 5.15 (d,  $J = 2.4$  Hz, 1H), 5.08 (d,  $J = 2.4$  Hz, 1H), 4.12 – 4.03 (m, 2H), 3.96 (d,  $J = 16.0$  Hz, 1H), 3.78 (s, 3H), 3.42 (d,  $J = 16.0$  Hz, 1H), 3.09 – 2.96 (m, 2H), 2.71 – 2.60 (m, 1H), 2.56 – 2.49 (m, 1H), 2.42 – 2.32 (m, 4H), 1.20 (s, 3H).  $^{13}\text{C}$  NMR (101 MHz,  $\text{CDCl}_3$ )  $\delta$  172.5, 143.5, 142.6, 140.9, 135.4, 133.7, 133.3, 132.3, 129.7, 129.7, 128.5, 127.7, 127.6, 126.5, 126.1, 126.0, 125.9, 125.6, 111.2, 54.5, 52.0, 50.2, 48.5, 45.8, 36.2, 32.6, 21.5, 19.4. IR (neat)  $\nu$  661, 1091, 1349, 1598, 1736, 2954  $\text{cm}^{-1}$ . HRMS (ESI) calcd. for  $\text{C}_{30}\text{H}_{31}\text{NO}_4\text{SNa}$  ( $\text{M}+\text{Na}$ ) $^+$ : 524.1866, Found: 524.1867.

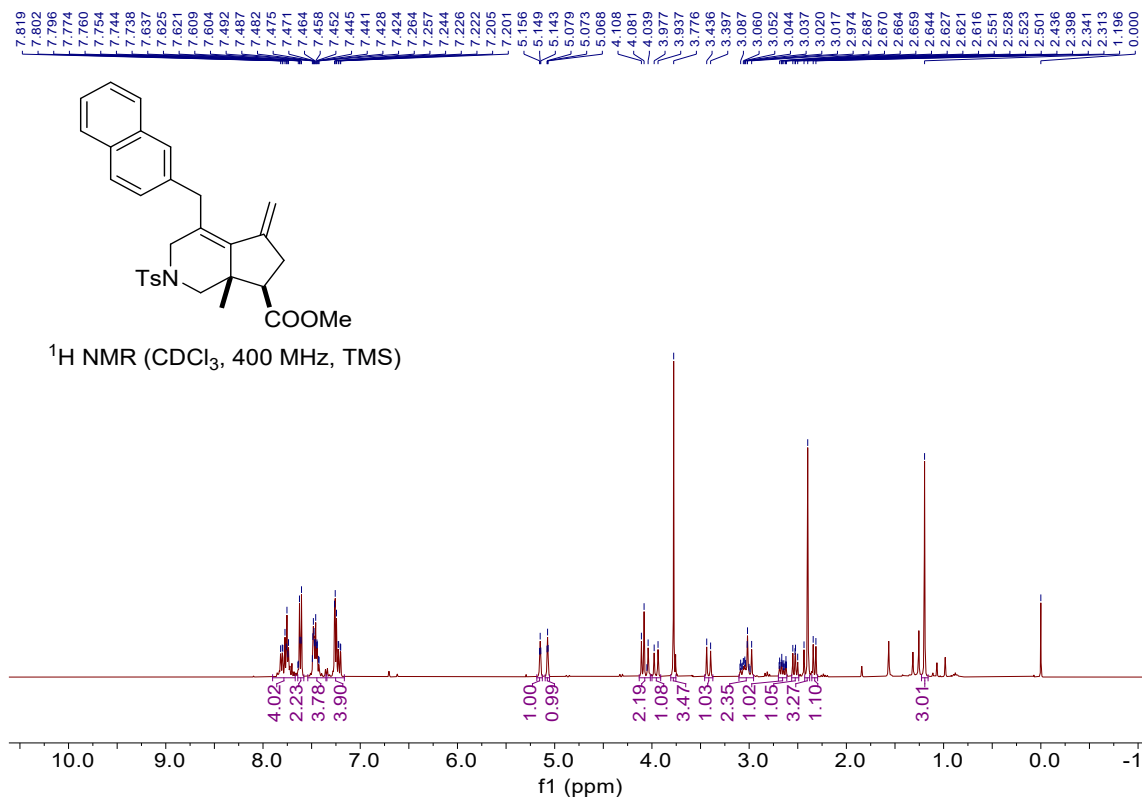

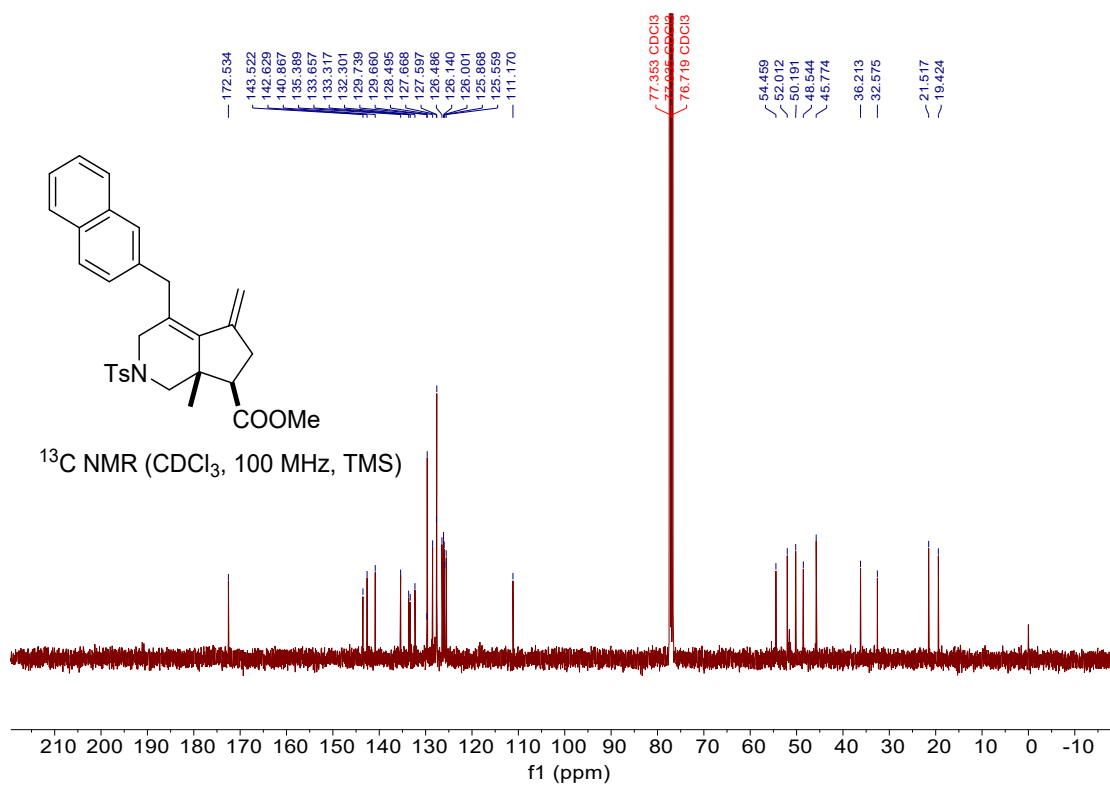

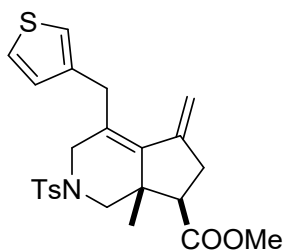

**(cis)-methyl-7a-methyl-5-methylene-4-(thiophen-3-ylmethyl)-2-tosyl-2,3,5,6,7,7a-hexahydro-1H-cyclopenta[c]pyridine-7-carboxylate (2u)**

A yellow oil, 90% yield, 41.4 mg.  $^1\text{H}$  NMR (400 MHz,  $\text{CDCl}_3$ )  $\delta$  7.66 (d,  $J = 8.0$  Hz, 2H), 7.32 (d,  $J = 8.0$  Hz, 2H), 7.29 – 7.23 (m, 1H), 6.90 – 6.82 (m, 2H), 5.11 (dt,  $J = 16.9, 2.4$  Hz, 2H), 4.12 – 4.03 (m, 2H), 3.80 – 3.69 (m, 4H), 3.18 (d,  $J = 15.6$  Hz, 1H), 3.08 – 2.92 (m, 2H), 2.62 (d,  $J = 17.2$  Hz, 1H), 2.53 – 2.40 (m, 4H), 2.29 (d,  $J = 11.2$  Hz, 1H), 1.13 (s, 3H).  $^{13}\text{C}$  NMR (101 MHz,  $\text{CDCl}_3$ )  $\delta$  172.5, 143.6, 142.5, 140.0, 138.2, 133.3, 129.7, 127.6, 126.2, 126.2, 120.9, 111.2, 67.1, 54.4, 52.0, 50.1, 48.5, 45.6, 32.5, 31.4, 21.6, 19.3. IR (neat)  $\nu$  660, 1091, 1352, 1597, 1733, 2963  $\text{cm}^{-1}$ . HRMS (ESI) calcd. for  $\text{C}_{24}\text{H}_{27}\text{NO}_4\text{S}_2\text{Na}$  ( $\text{M}+\text{Na}$ ) $^+$ : 480.1274, Found: 480.1273.

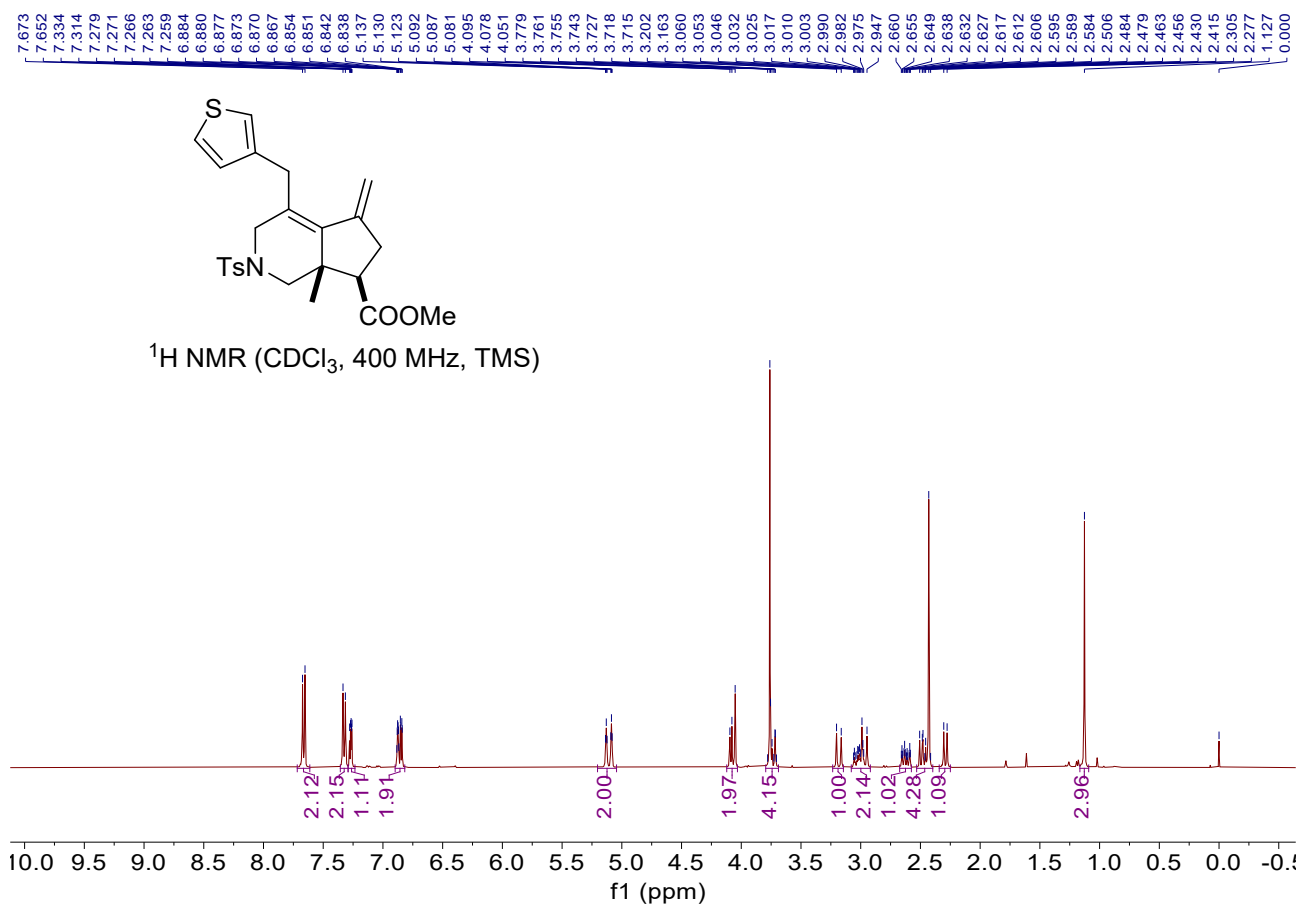

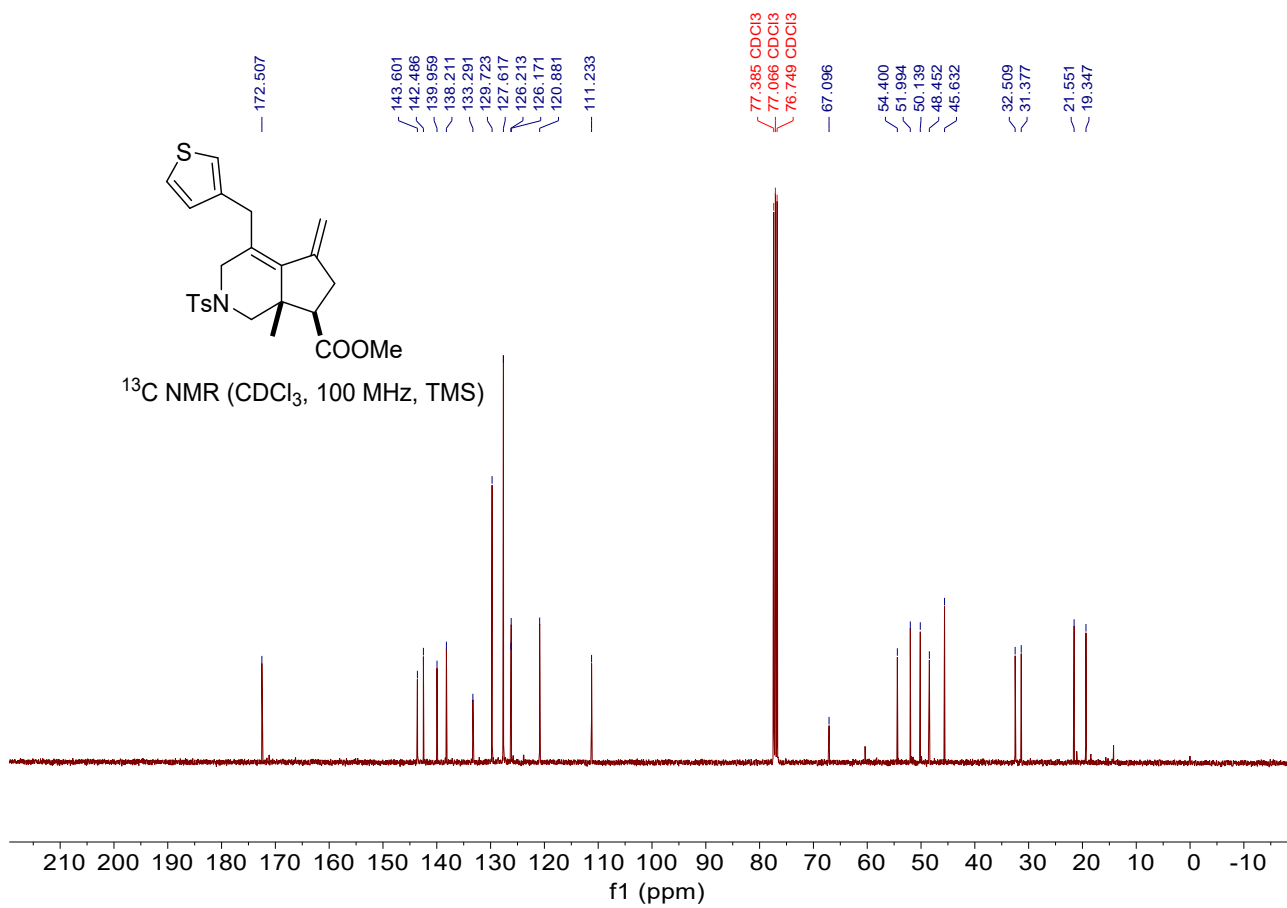

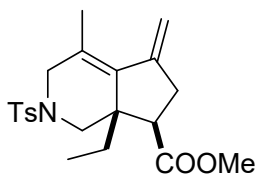

**(cis)-methyl-7a-ethyl-4-methyl-5-methylene-2-tosyl-2,3,5,6,7,7a-hexahydro-1H-cyclopenta[c]pyridine-7-carboxylate (2v)**

A colorless oil, 92% yield, 36.8 mg.  $^1\text{H}$  NMR (400 MHz,  $\text{CDCl}_3$ )  $\delta$  7.71 (d,  $J = 8.0$  Hz, 2H), 7.35 (d,  $J = 8.0$  Hz, 2H), 5.18 – 5.09 (m, 2H), 4.20 (d,  $J = 11.2$  Hz, 1H), 4.03 (d,  $J = 17.2$  Hz, 1H), 3.74 (s, 3H), 3.06 – 2.89 (m, 2H), 2.59 – 2.49 (m, 1H), 2.44 (s, 3H), 2.42 – 2.34 (m, 1H), 2.21 (d,  $J = 11.2$  Hz, 1H), 1.79 (s, 3H), 1.66 – 1.55 (m, 1H), 1.48 (dq,  $J = 14.8, 7.6$  Hz, 1H), 0.88 (t,  $J = 7.6$  Hz, 3H).  $^{13}\text{C}$  NMR (100 MHz,  $\text{CDCl}_3$ )  $\delta$  172.9, 144.0, 143.6, 136.9, 133.1, 129.7, 127.6, 124.6, 110.7, 53.3, 51.8, 50.2, 49.4, 48.5, 33.0, 26.9, 21.5, 17.2, 9.5. IR (neat)  $\nu$  661, 1091, 1344, 1597, 1734, 2951  $\text{cm}^{-1}$ . HRMS (ESI) calcd. for  $\text{C}_{21}\text{H}_{27}\text{NO}_4\text{SNa}$  ( $\text{M}+\text{Na}$ ) $^+$ : 412.1553, Found: 412.1554.

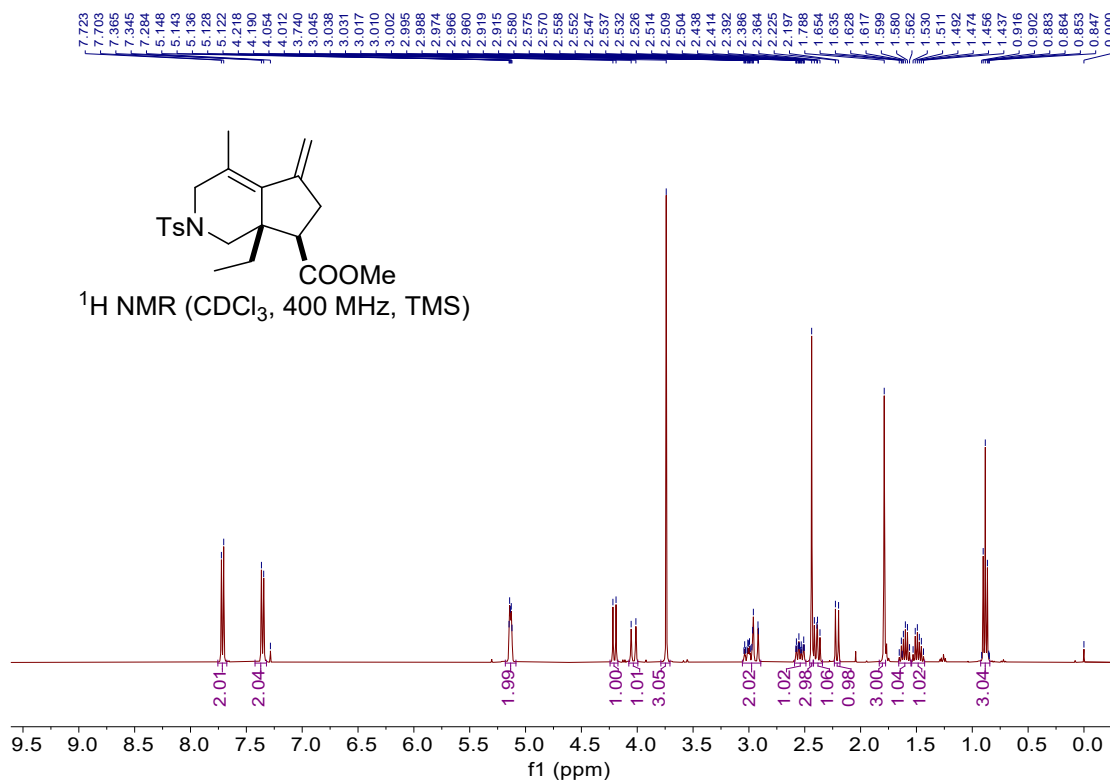

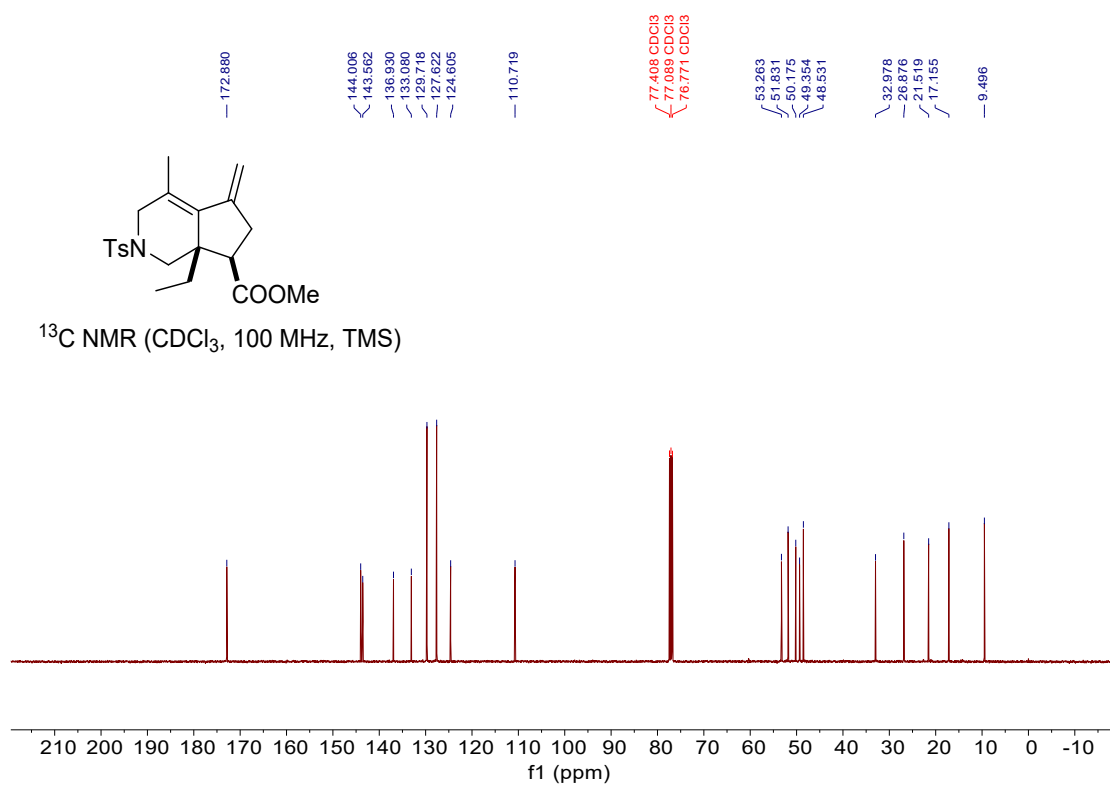

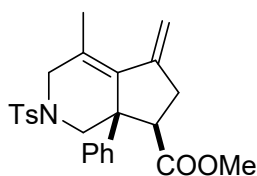

**(cis)-methyl-4-methyl-5-methylene-7a-phenyl-2-tosyl-2,3,5,6,7,7a-hexahydro-1H-cyclopenta[c]pyridine-7-carboxylate (2w)**

A colorless oil, 80% yield, 35.0 mg.  $^1\text{H}$  NMR (400 MHz,  $\text{CDCl}_3$ )  $\delta$  7.47 – 7.40 (m, 2H), 7.26 – 7.14 (m, 7H), 5.33 (d,  $J = 2.8$  Hz, 1H), 5.23 (d,  $J = 2.8$  Hz, 1H), 4.92 (d,  $J = 11.6$  Hz, 1H), 3.77 (d,  $J = 17.4$  Hz, 1H), 3.64 (s, 3H), 3.21 (d,  $J = 17.4$  Hz, 1H), 2.82 – 2.70 (m, 2H), 2.66 (d,  $J = 11.6$  Hz, 1H), 2.55 – 2.48 (m, 1H), 2.40 (s, 3H), 1.90 (s, 3H).  $^{13}\text{C}$  NMR (100 MHz,  $\text{CDCl}_3$ )  $\delta$  171.8, 145.2, 143.4, 139.7, 136.6, 129.5, 128.2, 127.7, 127.5, 127.1, 127.0, 110.4, 54.0, 53.1, 51.9, 51.8, 49.6, 33.3, 21.5, 17.7. IR (neat)  $\nu$  659, 1090, 1350, 1579, 1730, 2948  $\text{cm}^{-1}$ . HRMS (ESI) calcd. for  $\text{C}_{25}\text{H}_{27}\text{NO}_4\text{SNa}$  ( $\text{M}+\text{Na}$ ) $^+$ : 460.1553, Found: 460.1545.

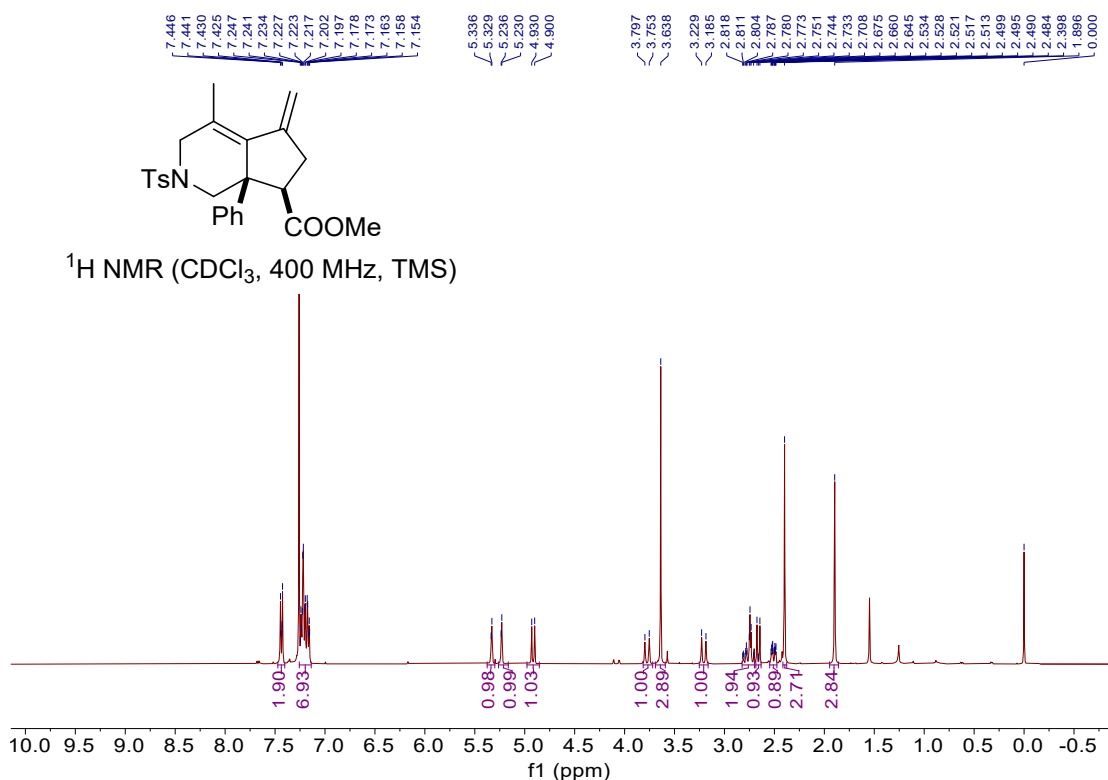



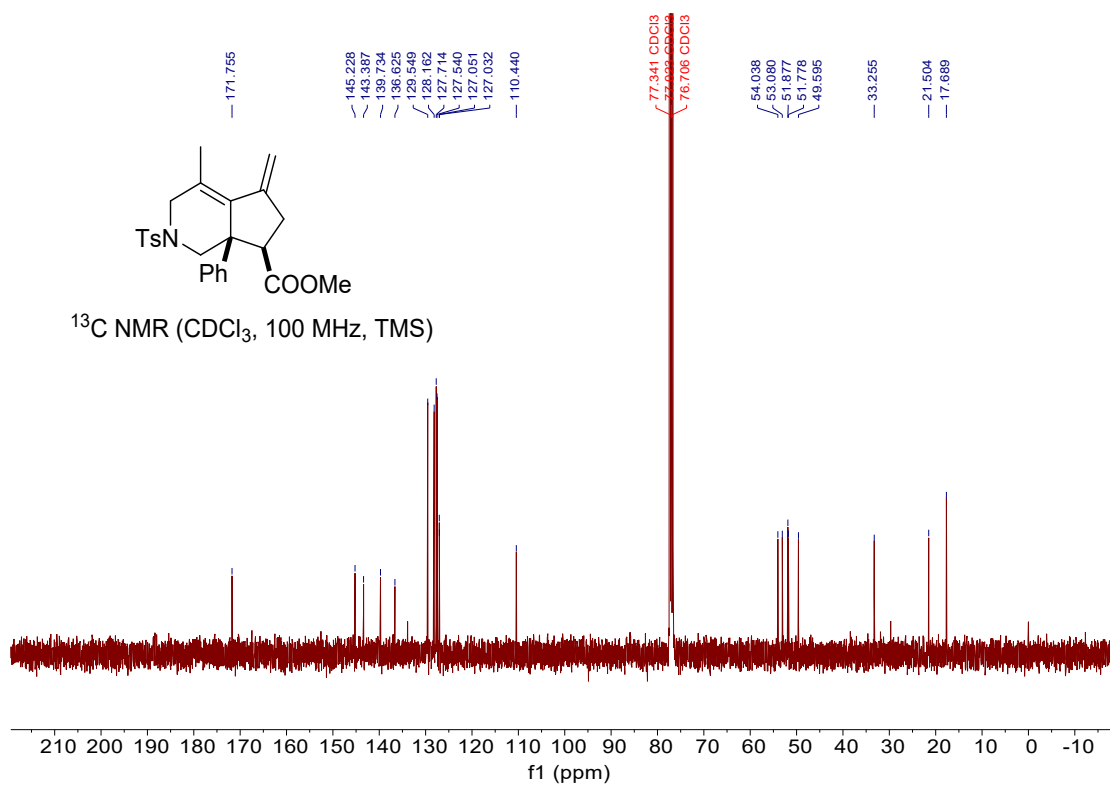

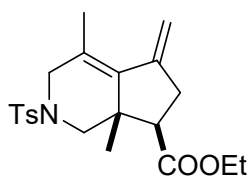

**(cis)-ethyl-4,7a-dimethyl-5-methylene-2-tosyl-2,3,5,6,7,7a-hexahydro-1H-cyclopenta[c]pyridine-7-carboxylate (2x)**

A colorless oil, 90% yield, 35.1 mg.  $^1\text{H}$  NMR (400 MHz,  $\text{CDCl}_3$ )  $\delta$  7.70 (d,  $J = 8.0$  Hz, 2H), 7.35 (d,  $J = 8.0$  Hz, 2H), 5.20 – 5.09 (m, 2H), 4.30 – 4.11 (m, 2H), 4.09 – 3.99 (m, 2H), 3.07 – 2.92 (m, 2H), 2.62 – 2.52 (m, 1H), 2.44 (s, 3H), 2.42 – 2.34 (m, 1H), 2.26 (d,  $J = 11.2$  Hz, 1H), 1.76 (s, 3H), 1.32 (t,  $J = 7.2$  Hz, 3H), 1.04 (s, 3H).  $^{13}\text{C}$  NMR (100 MHz,  $\text{CDCl}_3$ )  $\delta$  172.1, 143.5, 143.5, 138.0, 133.6, 129.7, 127.6, 123.9, 111.1, 60.7, 54.3, 50.3, 49.4, 45.5, 32.6, 21.5, 19.1, 17.1, 14.4. IR (neat)  $\nu$  661, 1091, 1347, 1597, 1731, 2976  $\text{cm}^{-1}$ . HRMS (ESI) calcd. for  $\text{C}_{21}\text{H}_{27}\text{NO}_4\text{SNa}$  ( $\text{M}+\text{Na}$ ) $^+$ : 412.1553, Found: 412.1547.

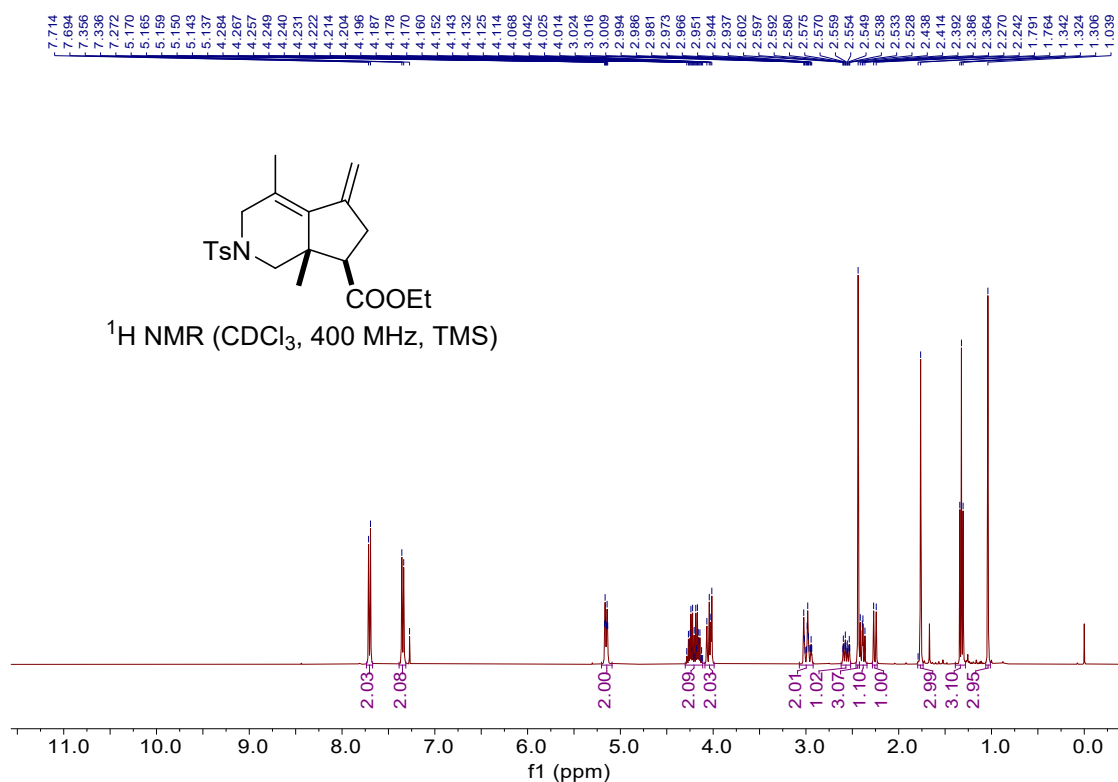

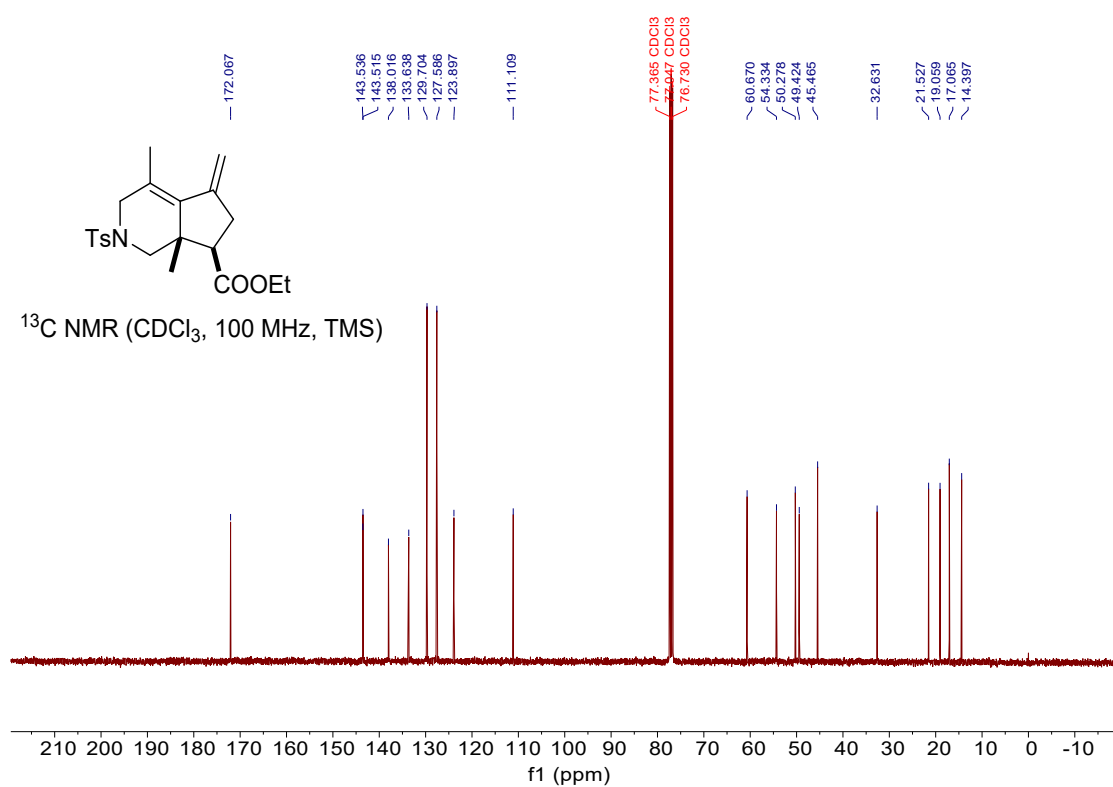

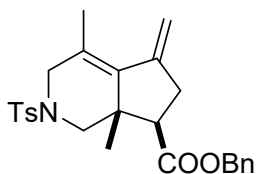

**(cis)-benzyl-4,7a-dimethyl-5-methylene-2-tosyl-2,3,5,6,7,7a-hexahydro-1H-cyclopenta[c]pyridine-7-carboxylate (2y)**

A colorless oil, 90% yield, 40.6 mg.  $^1\text{H}$  NMR (400 MHz,  $\text{CDCl}_3$ )  $\delta$  7.58 (d,  $J = 8.0$  Hz, 2H), 7.48 – 7.39 (m, 5H), 7.29 – 7.26 (m, 2H), 5.22 (d,  $J = 12.0$  Hz, 1H), 5.16 (s, 1H), 5.14 (s, 1H), 5.10 (d,  $J = 12.0$  Hz, 1H), 4.08 – 3.97 (m, 2H), 3.06 – 2.93 (m, 2H), 2.63 – 2.52 (m, 1H), 2.47 – 2.38 (m, 4H), 2.17 (d,  $J = 11.2$  Hz, 1H), 1.75 (s, 3H), 1.02 (s, 3H).  $^{13}\text{C}$  NMR (100 MHz,  $\text{CDCl}_3$ )  $\delta$  171.9, 143.5, 143.4, 137.9, 135.7, 133.5, 129.7, 128.8, 128.6, 128.5, 127.5, 124.0, 111.2, 66.8, 54.3, 50.3, 49.5, 45.6, 32.5, 21.5, 19.1, 17.1. IR (neat)  $\nu$  661, 908, 1159, 1355, 1596, 1735, 2923  $\text{cm}^{-1}$ . HRMS (ESI) calcd. for  $\text{C}_{26}\text{H}_{29}\text{NO}_4\text{SNa}$  ( $\text{M}+\text{Na}$ ) $^+$ : 474.1710, Found: 474.1714.

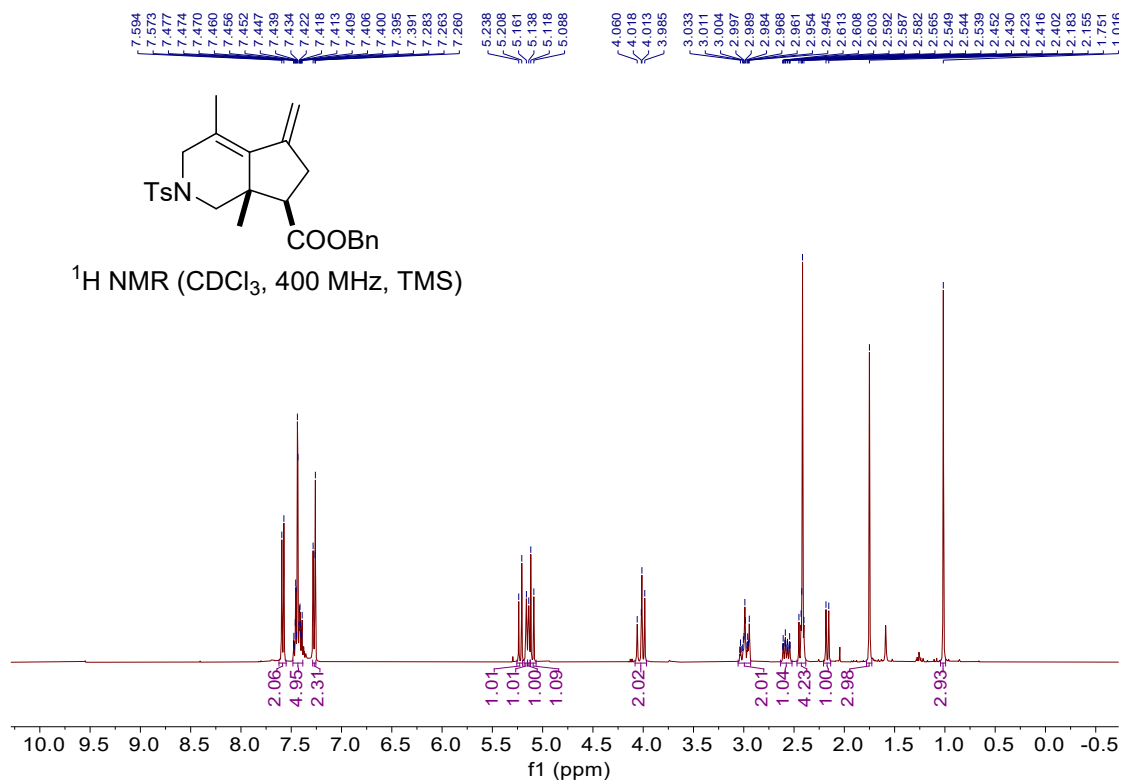

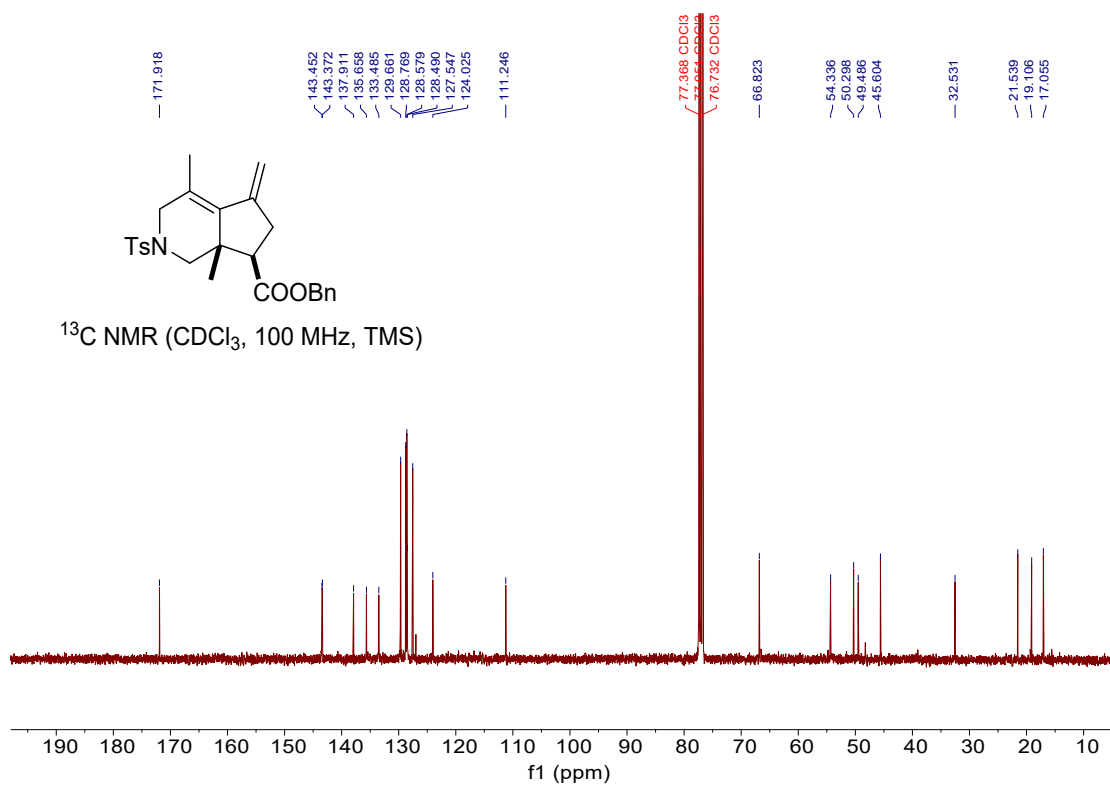

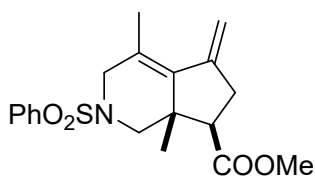

**(cis)-methyl-4,7a-dimethyl-5-methylene-2-(phenylsulfonyl)-2,3,5,6,7,7a-hexahydro-1H-cyclopenta[c]pyridine-7-carboxylate (2z)**

A colorless oil, 90% yield, 32.5 mg.  $^1\text{H}$  NMR (400 MHz,  $\text{CDCl}_3$ )  $\delta$  7.87 – 7.81 (m, 2H), 7.65 – 7.50 (m, 3H), 5.21 – 5.12 (m, 2H), 4.12 – 4.02 (m, 2H), 3.75 (s, 3H), 3.05 – 2.94 (m, 2H), 2.64 – 2.53 (m, 1H), 2.46 – 2.39 (m, 1H), 2.29 (d,  $J = 11.2$  Hz, 1H), 1.77 (s, 3H), 1.04 (s, 3H).  $^{13}\text{C}$  NMR (100 MHz,  $\text{CDCl}_3$ )  $\delta$  173.6, 144.4, 139.0, 137.6, 133.8, 130.1, 128.5, 124.9, 112.2, 55.3, 52.9, 51.2, 50.4, 46.5, 38.0, 33.7, 20.2, 18.1. IR (neat)  $\nu$  661, 803, 1091, 1350, 1661, 1717, 2952  $\text{cm}^{-1}$ . HRMS (ESI) calcd. for  $\text{C}_{19}\text{H}_{23}\text{NO}_4\text{SNa}$  ( $\text{M}+\text{Na}$ ) $^+$ : 384.1240, Found: 384.1231.

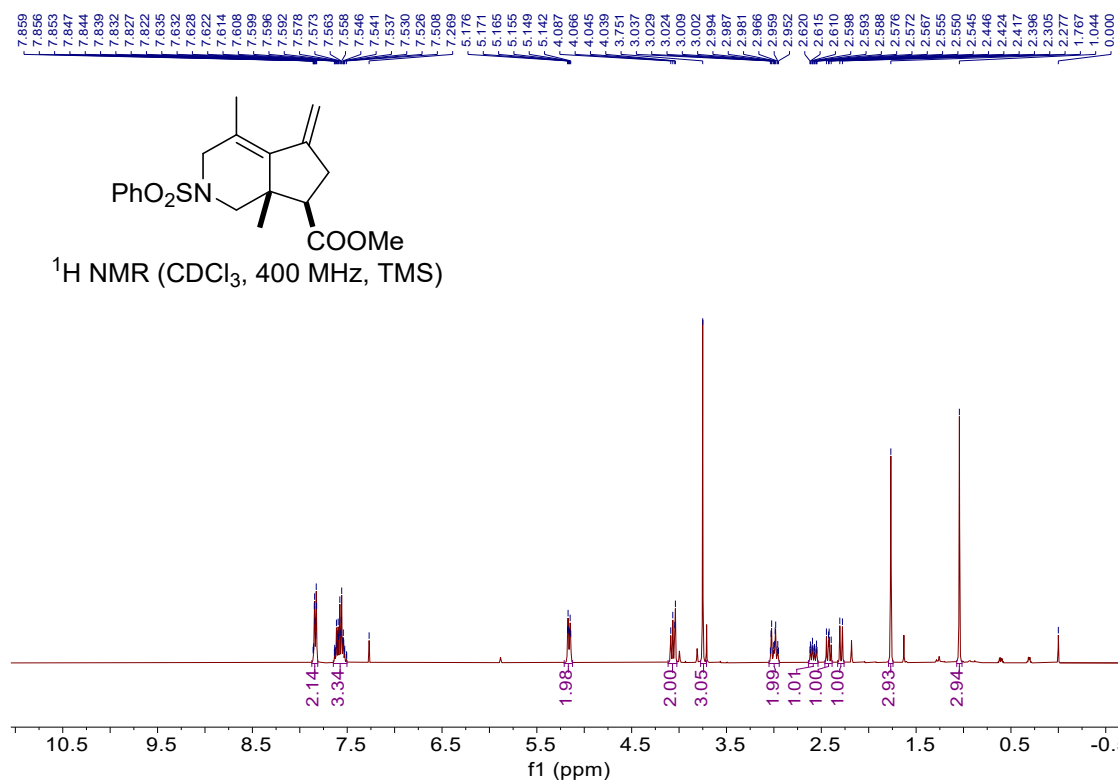



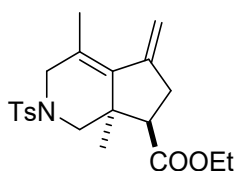

**(trans)-ethyl-4,7a-dimethyl-5-methylene-2-tosyl-2,3,5,6,7,7a-hexahydro-1H-cyclopenta[c]pyridine-7-carboxylate (4a)**

A colorless oil, 94% yield, 36.6 mg.  $^1\text{H}$  NMR (400 MHz,  $\text{CDCl}_3$ )  $\delta$  7.58 (d,  $J = 8.0$  Hz, 2H), 7.23 (d,  $J = 8.0$  Hz, 2H), 5.16 – 4.99 (m, 2H), 4.00 – 3.82 (m, 3H), 3.70 (d,  $J = 10.8$  Hz, 1H), 2.87 (d,  $J = 16.8$  Hz, 1H), 2.75 – 2.55 (m, 3H), 2.36 (s, 3H), 1.94 (d,  $J = 10.8$  Hz, 1H), 1.71 (s, 3H), 1.22 (s, 3H), 1.10 (t,  $J = 7.2$  Hz, 3H).  $^{13}\text{C}$  NMR (100 MHz,  $\text{CDCl}_3$ )  $\delta$  174.1, 144.7, 143.7, 136.4, 133.2, 129.6, 127.5, 124.0, 110.6, 60.1, 51.4, 50.2, 49.6, 46.5, 34.2, 26.2, 21.5, 17.2, 14.2. IR (neat)  $\nu$  660, 817, 1345, 1597, 1731, 2923  $\text{cm}^{-1}$ . HRMS (ESI) calcd. for  $\text{C}_{21}\text{H}_{27}\text{NO}_4\text{SNa}$  ( $\text{M}+\text{Na}$ ) $^+$ : 412.1553, Found: 412.1550.

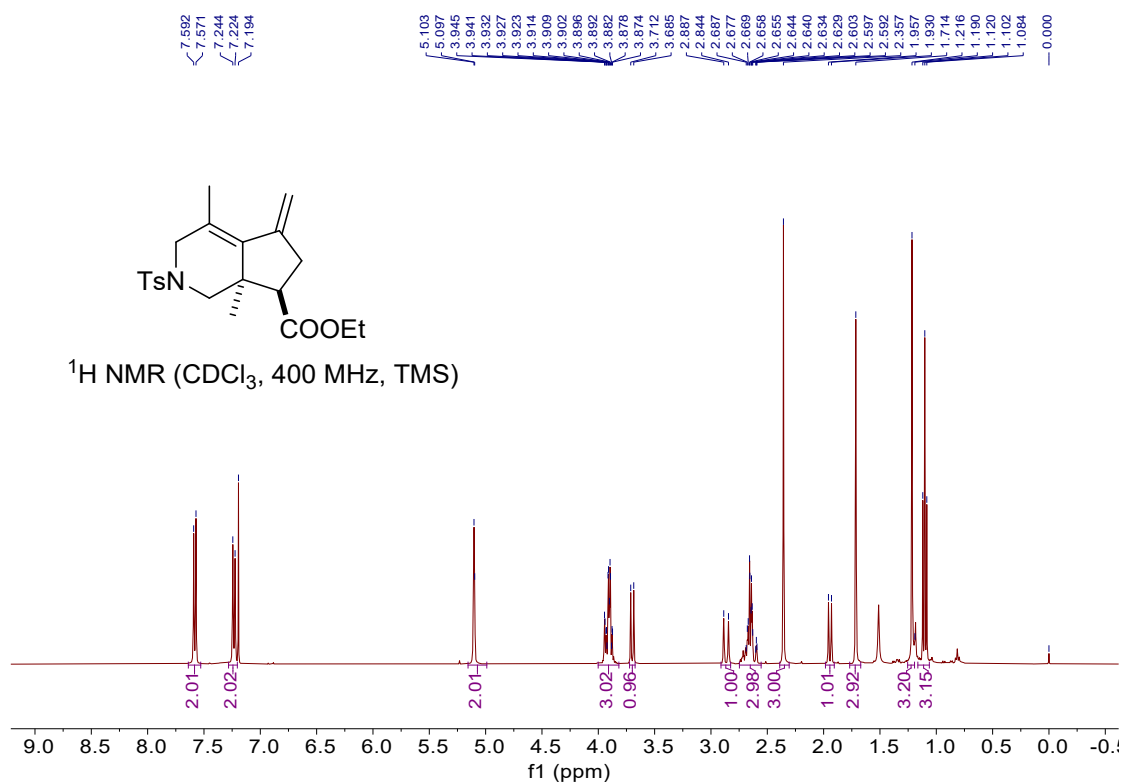



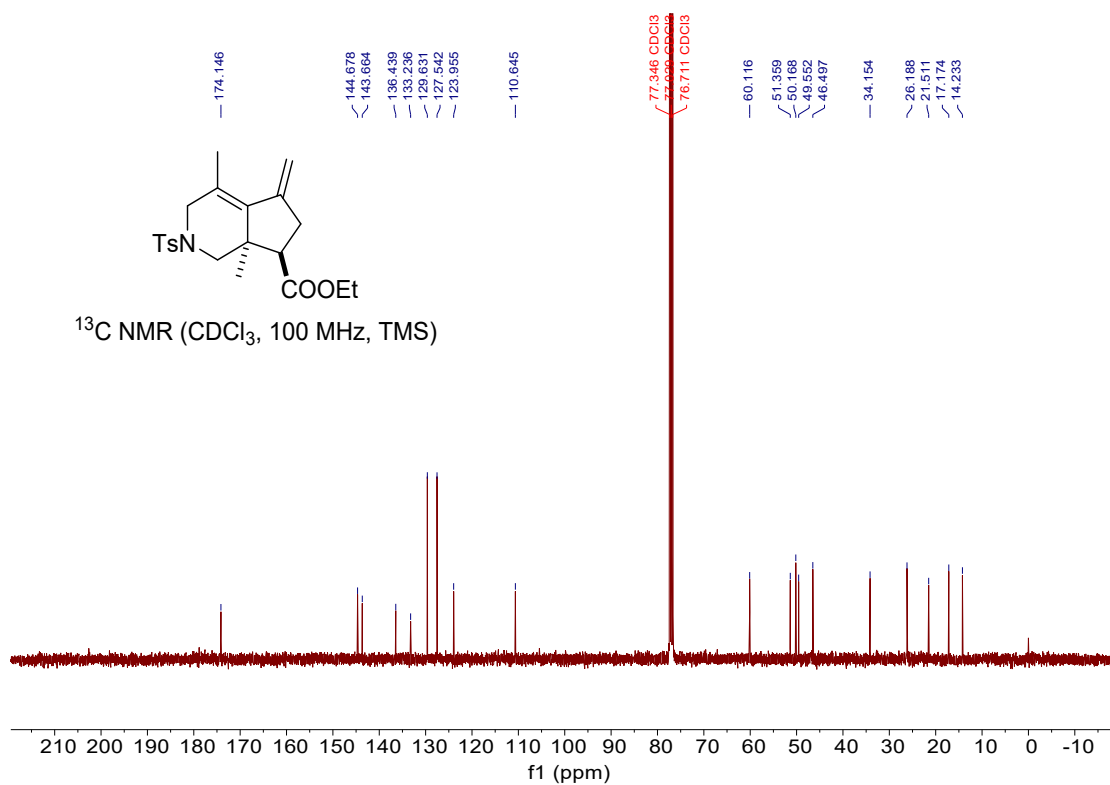

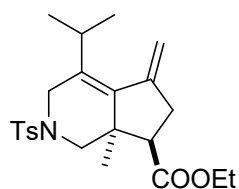

**(trans)-ethyl-4-isopropyl-7a-methyl-5-methylene-2-tosyl-2,3,5,6,7,7a-hexahydro-1H-cyclopenta[c]pyridine-7-carboxylate (4b)**

A colorless oil, 90% yield, 37.6 mg.  $^1\text{H}$  NMR (400 MHz,  $\text{CDCl}_3$ )  $\delta$  7.65 (d,  $J = 8.0$  Hz, 2H), 7.31 (d,  $J = 8.0$  Hz, 2H), 5.21 – 5.11 (m, 2H), 4.08 – 3.91 (m, 3H), 3.71 (dd,  $J = 10.8, 1.2$  Hz, 1H), 3.23 (h,  $J = 7.2$  Hz, 1H), 2.99 (d,  $J = 16.4$  Hz, 1H), 2.74 – 2.67 (m, 3H), 2.43 (s, 3H), 1.94 (d,  $J = 10.8$  Hz, 1H), 1.26 (s, 3H), 1.14 (t,  $J = 7.2$  Hz, 3H), 1.10 (d,  $J = 7.2$  Hz, 3H), 0.90 (d,  $J = 7.2$  Hz, 3H).  $^{13}\text{C}$  NMR (150 MHz,  $\text{CDCl}_3$ )  $\delta$  174.1, 144.0, 143.7, 135.2, 133.6, 133.0, 133.0, 129.6, 127.5, 110.6, 60.1, 51.4, 49.9, 46.0, 43.9, 34.1, 28.4, 26.5, 21.5, 21.5, 20.0, 14.2. IR (neat)  $\nu$  661, 814, 1343, 1597, 1728, 2980  $\text{cm}^{-1}$ . HRMS (ESI) calcd. for  $\text{C}_{23}\text{H}_{31}\text{NO}_4\text{SNa}$  ( $\text{M}+\text{Na}$ ) $^+$ : 440.1866, Found: 440.1859.

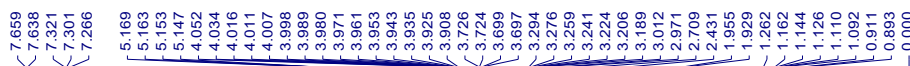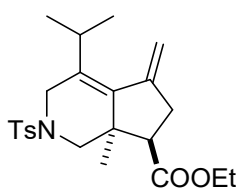

$^1\text{H}$  NMR ( $\text{CDCl}_3$ , 400 MHz, TMS)

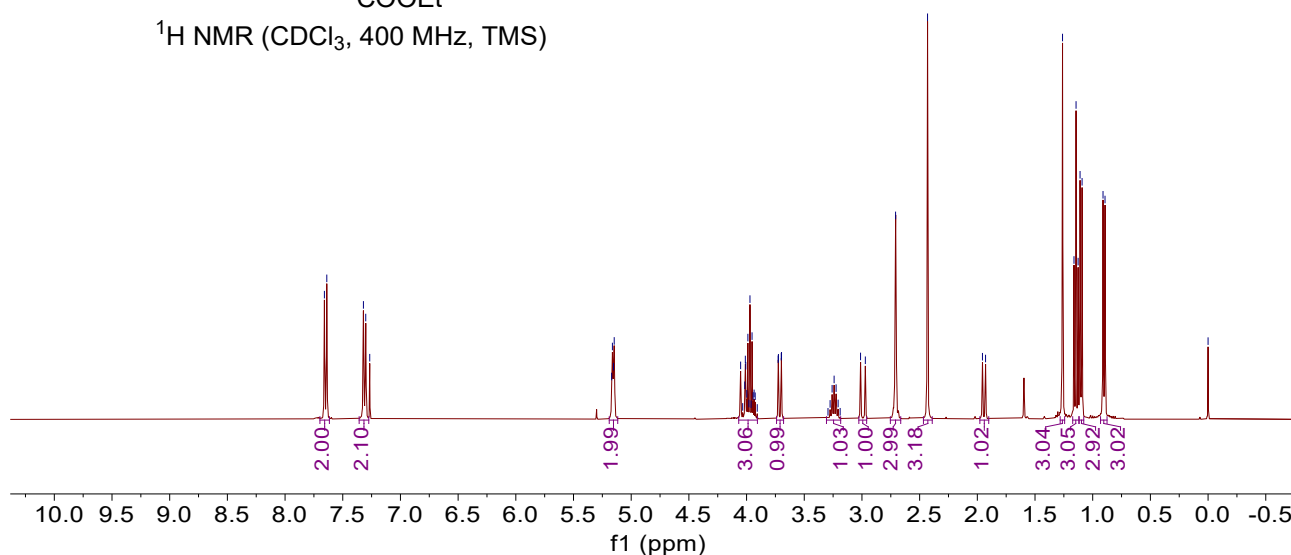

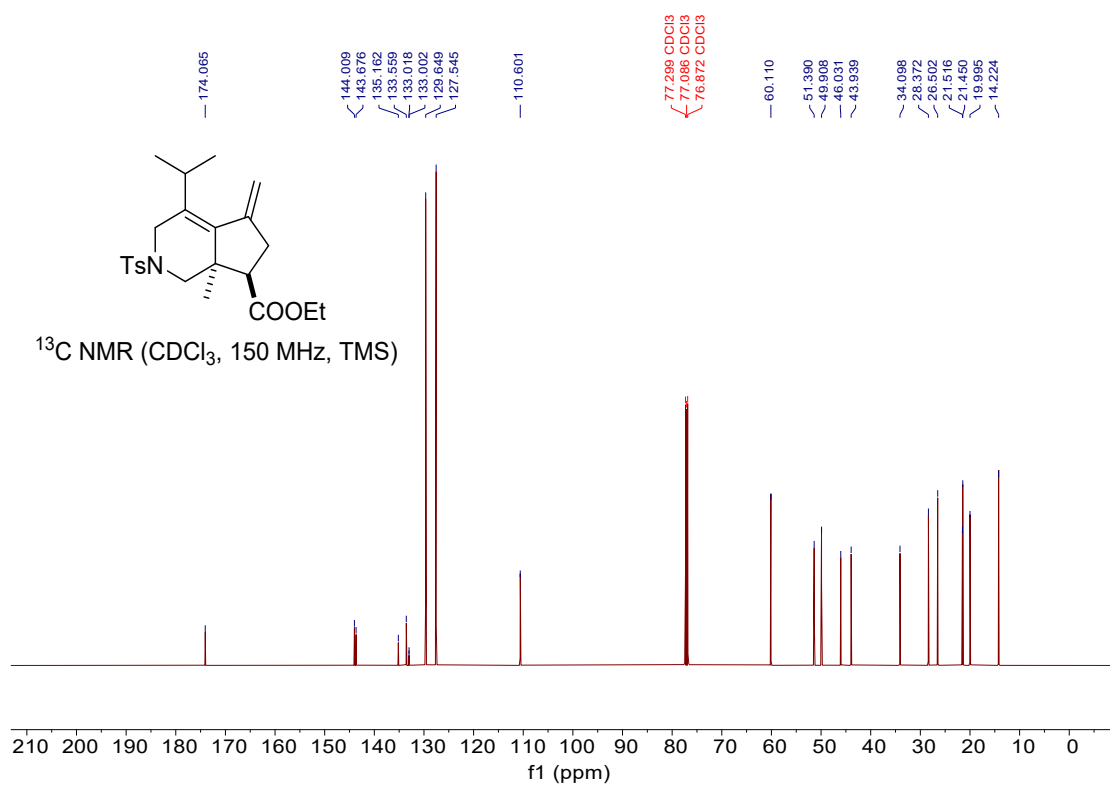

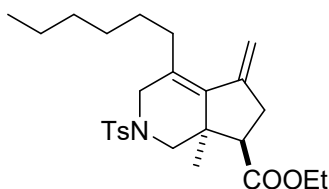

**(trans)-ethyl-4-hexyl-7a-methyl-5-methylene-2-tosyl-2,3,5,6,7,7a-hexahydro-1H-cyclopenta[c]pyridine-7-carboxylate (4c)**

A colorless oil, 90% yield, 41.3 mg.  $^1\text{H}$  NMR (400 MHz,  $\text{CDCl}_3$ )  $\delta$  7.65 (d,  $J = 8.0$  Hz, 2H), 7.30 (d,  $J = 8.0$  Hz, 2H), 5.19 – 5.06 (m, 2H), 4.05 (d,  $J = 16.8$  Hz, 1H), 3.97 (qd,  $J = 7.2, 2.8$  Hz, 2H), 3.74 (d,  $J = 10.8$  Hz, 1H), 2.91 (d,  $J = 16.8$  Hz, 1H), 2.80 – 2.62 (m, 3H), 2.43 (s, 4H), 1.98 (d,  $J = 10.8$  Hz, 1H), 1.89 – 1.76 (m, 1H), 1.53 – 1.42 (m, 1H), 1.33 – 1.19 (m, 10H), 1.16 (t,  $J = 7.2$  Hz, 3H), 0.97 – 0.81 (m, 3H).  $^{13}\text{C}$  NMR (100 MHz,  $\text{CDCl}_3$ )  $\delta$  174.1, 144.2, 143.7, 136.0, 133.1, 129.6, 129.4, 127.6, 109.8, 60.1, 51.4, 50.1, 48.4, 46.4, 34.2, 31.6, 31.0, 29.5, 28.1, 26.4, 22.6, 21.5, 14.2, 14.1. IR (neat)  $\nu$  661, 813, 1220, 1597, 1712, 2980  $\text{cm}^{-1}$ . HRMS (ESI) calcd. for  $\text{C}_{26}\text{H}_{37}\text{NO}_4\text{SNa}$  ( $\text{M}+\text{Na}$ ) $^+$ : 482.2336, Found: 482.2328.

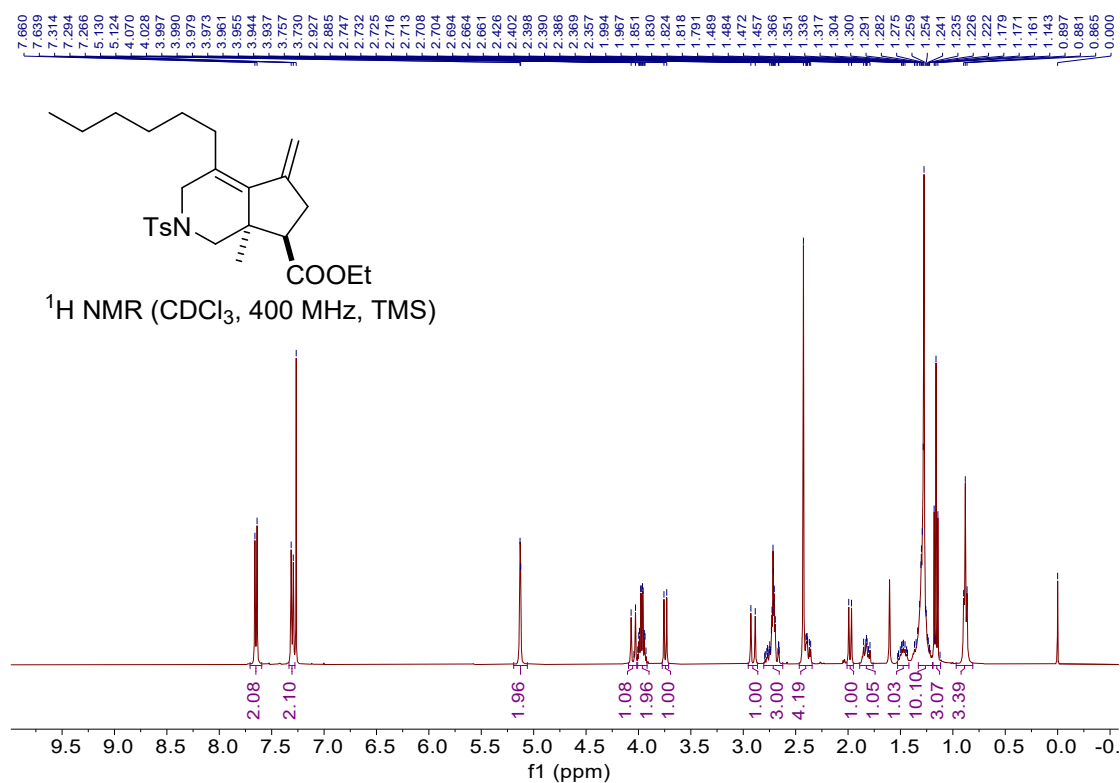

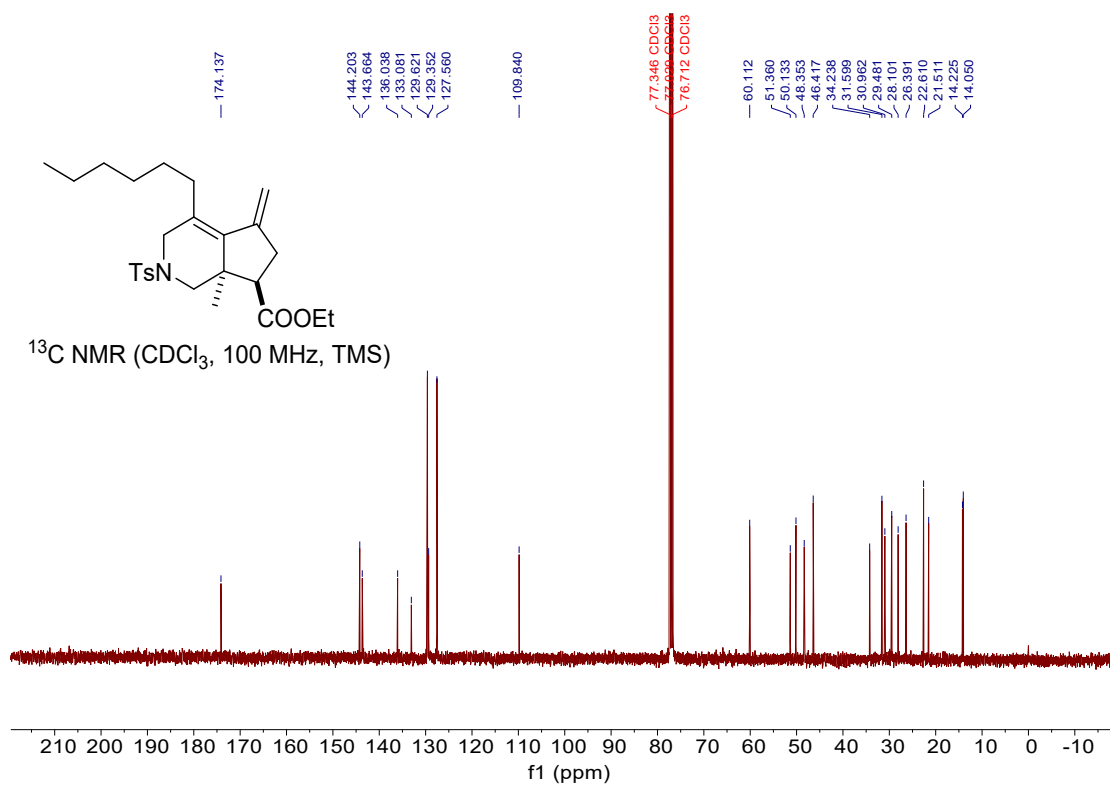

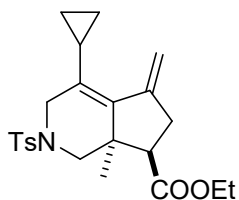

**(trans)-ethyl-4-cyclopropyl-7a-methyl-5-methylene-2-tosyl-2,3,5,6,7,7a-hexahydro-1H-cyclopenta[c]pyridine-7-carboxylate (4d)**

A colorless oil, 96% yield, 39.8 mg.  $^1\text{H}$  NMR (400 MHz,  $\text{CDCl}_3$ )  $\delta$  7.64 (d,  $J = 8.0$  Hz, 2H), 7.31 (d,  $J = 8.0$  Hz, 2H), 5.48 (s, 1H), 5.24 (s, 1H), 3.96 (qd,  $J = 7.2, 2.4$  Hz, 2H), 3.80 – 3.71 (m, 2H), 2.86 (d,  $J = 16.8$  Hz, 1H), 2.79 – 2.67 (m, 2H), 2.43 (s, 4H), 1.95 (d,  $J = 10.8$  Hz, 1H), 1.80 – 1.68 (m, 1H), 1.28 (s, 3H), 1.15 (t,  $J = 7.2$  Hz, 3H), 0.81 – 0.72 (m, 1H), 0.66 – 0.55 (m, 2H), 0.45 – 0.34 (m, 1H).  $^{13}\text{C}$  NMR (151 MHz,  $\text{CDCl}_3$ )  $\delta$  174.1, 144.1, 143.7, 138.4, 133.1, 129.7, 127.5, 127.2, 111.5, 60.1, 51.2, 50.1, 46.5, 46.0, 34.0, 26.2, 21.5, 14.2, 12.9, 6.8, 4.5. IR (neat)  $\nu$  662, 1093, 1343, 1597, 1710, 2985  $\text{cm}^{-1}$ . HRMS (ESI) calcd. for  $\text{C}_{23}\text{H}_{29}\text{NO}_4\text{SNa}$  ( $\text{M}+\text{Na}$ ) $^+$ : 438.1710, Found: 438.1708.

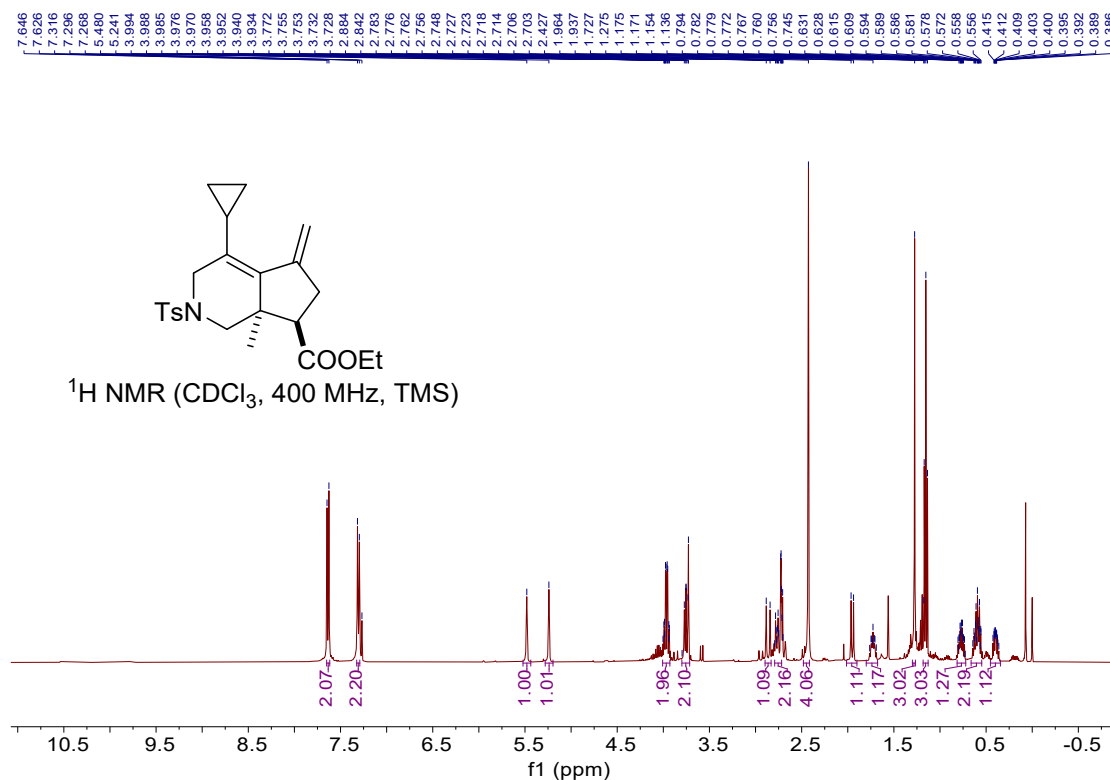

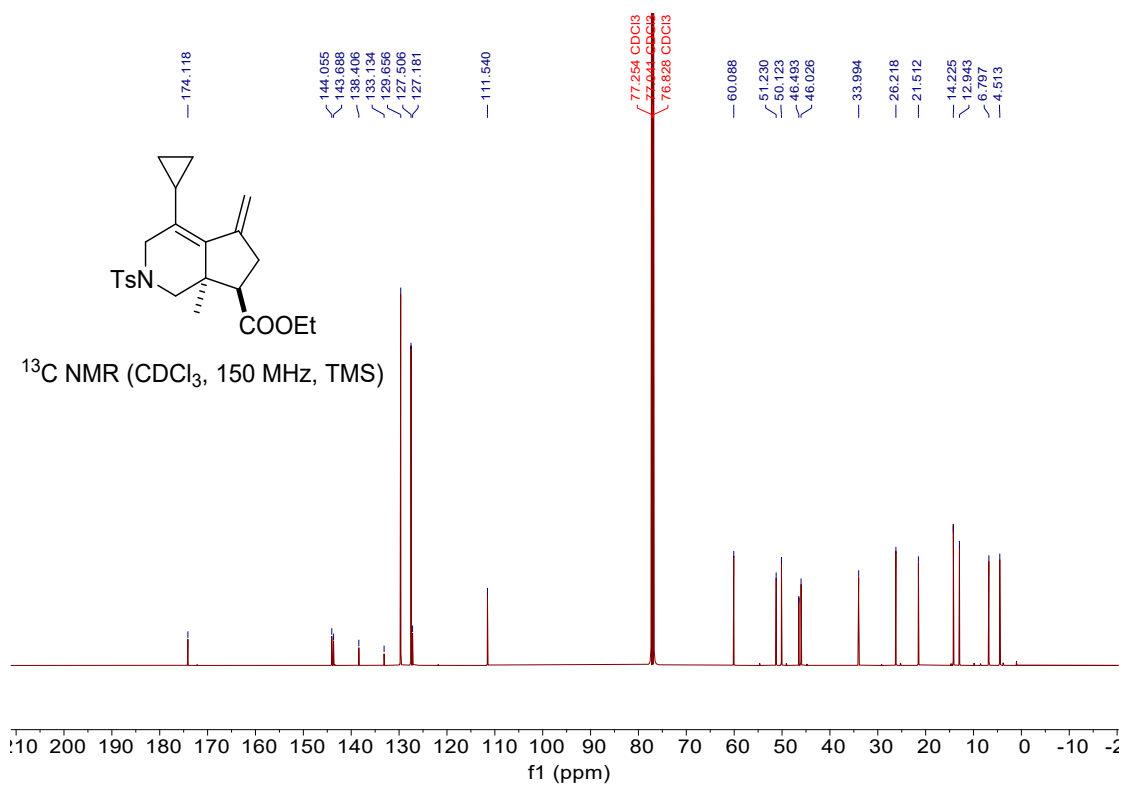

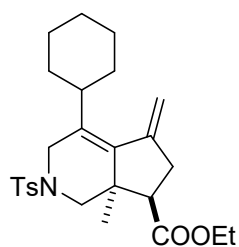

**(trans)-ethyl-4-cyclohexyl-7a-methyl-5-methylene-2-tosyl-2,3,5,6,7,7a-hexahydro-1H-cyclopenta[c]pyridine-7-carboxylate (4e)**

A colorless oil, 90% yield, 42.1 mg.  $^1\text{H}$  NMR (400 MHz,  $\text{CDCl}_3$ )  $\delta$  7.64 (d,  $J = 8.0$  Hz, 2H), 7.31 (d,  $J = 8.0$  Hz, 2H), 5.15 (s, 1H), 5.09 (s, 1H), 4.09 – 3.91 (m, 3H), 3.71 (d,  $J = 10.8$  Hz, 1H), 2.97 (d,  $J = 16.4$  Hz, 1H), 2.87 – 2.78 (m, 1H), 2.75 – 2.66 (m, 3H), 2.43 (s, 3H), 1.92 (d,  $J = 10.8$  Hz, 1H), 1.80 – 1.62 (m, 4H), 1.51 – 1.43 (m, 1H), 1.39 – 1.29 (m, 2H), 1.26 (s, 3H), 1.14 (t,  $J = 7.2$  Hz, 6H).  $^{13}\text{C}$  NMR (100 MHz,  $\text{CDCl}_3$ )  $\delta$  174.1, 144.0, 143.7, 135.1, 133.5, 133.0, 129.7, 127.6, 110.6, 60.1, 51.4, 49.9, 46.2, 45.1, 39.3, 34.2, 31.7, 30.2, 26.6, 26.6, 26.0, 26.0, 21.5, 14.2. IR (neat)  $\nu$  660, 1092, 1376, 1712, 2927  $\text{cm}^{-1}$ . HRMS (ESI) calcd. for  $\text{C}_{26}\text{H}_{35}\text{NO}_4\text{SNa}$  ( $\text{M}+\text{Na}$ ) $^+$ : 480.2179, Found: 480.2180.

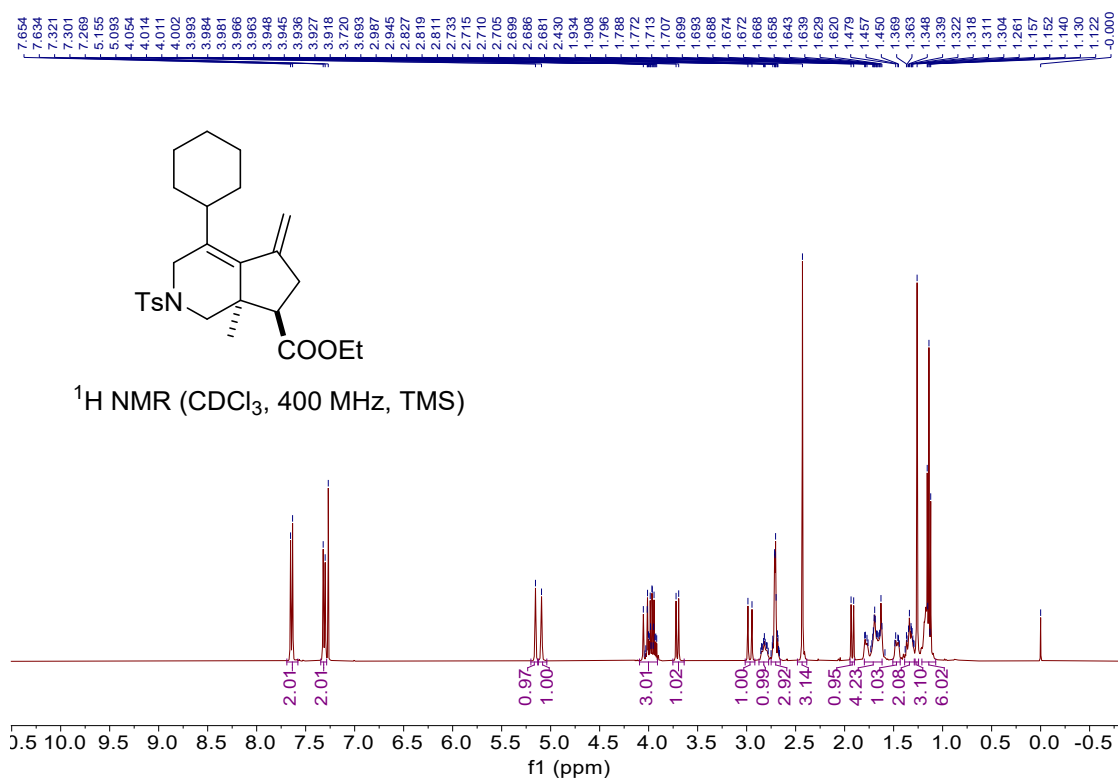



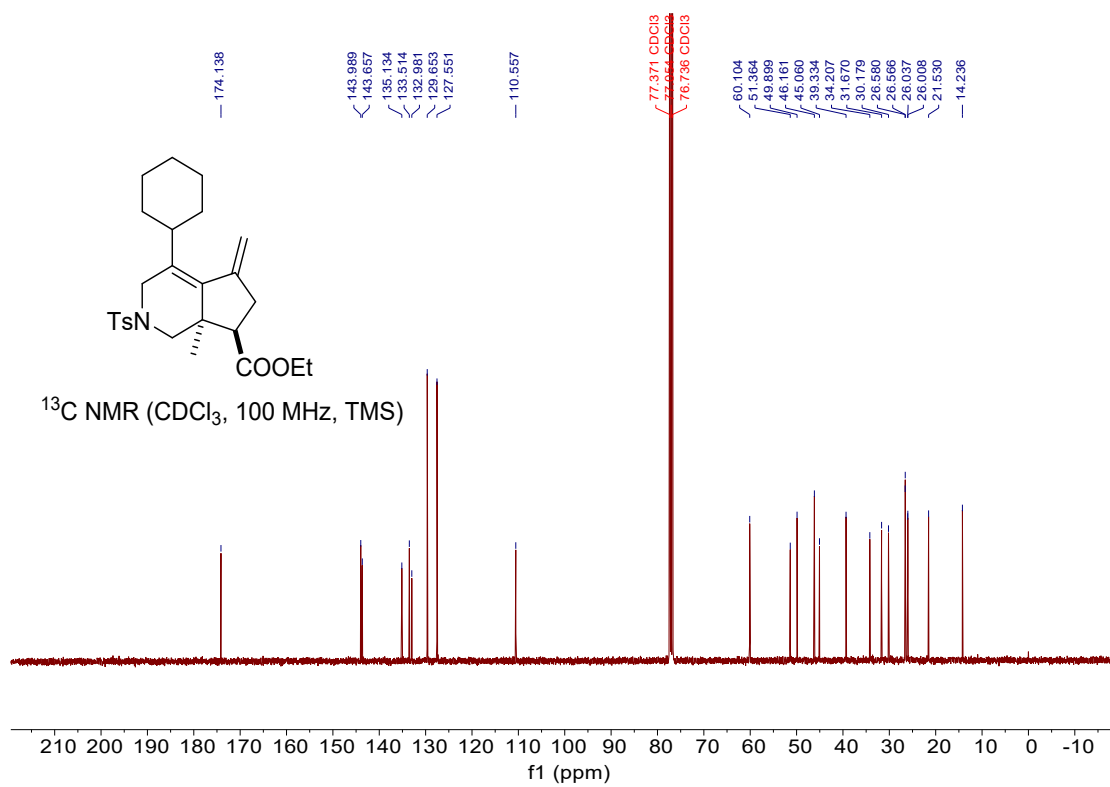

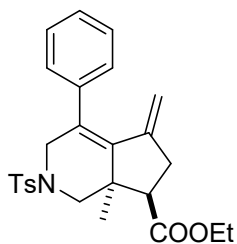

**(trans)-ethyl-4-cyclohexyl-7a-methyl-5-methylene-2-tosyl-2,3,5,6,7,7a-hexahydro-1H-cyclopenta[c]pyridine-7-carboxylate (4f)**

A colorless oil, 80% yield, 36.1 mg.  $^1\text{H}$  NMR (400 MHz,  $\text{CDCl}_3$ )  $\delta$  7.66 – 7.57 (m, 2H), 7.36 – 7.26 (m, 5H), 7.25 – 7.17 (m, 2H), 4.81 (d,  $J = 2.8$  Hz, 1H), 4.35 (d,  $J = 3.2$  Hz, 1H), 4.29 (d,  $J = 17.2$  Hz, 1H), 4.04 (qd,  $J = 7.2, 2.4$  Hz, 2H), 3.86 (d,  $J = 10.8$  Hz, 1H), 3.04 (d,  $J = 17.2$  Hz, 1H), 2.82 – 2.61 (m, 3H), 2.41 (s, 3H), 2.15 (d,  $J = 10.8$  Hz, 1H), 1.39 (s, 3H), 1.20 (t,  $J = 7.2$  Hz, 3H).  $^{13}\text{C}$  NMR (100 MHz,  $\text{CDCl}_3$ )  $\delta$  174.1, 143.7, 142.9, 138.4, 138.1, 133.1, 129.7, 128.8, 128.6, 128.2, 127.7, 127.5, 111.7, 60.2, 51.2, 50.2, 50.0, 46.7, 33.8, 25.8, 21.5, 14.3. IR (neat)  $\nu$  658, 1090, 1348, 1719, 2933  $\text{cm}^{-1}$ . HRMS (ESI) calcd. for  $\text{C}_{26}\text{H}_{29}\text{NO}_4\text{SNa}$  ( $\text{M}+\text{Na}$ ) $^+$ : 474.1710, Found: 474.1705.

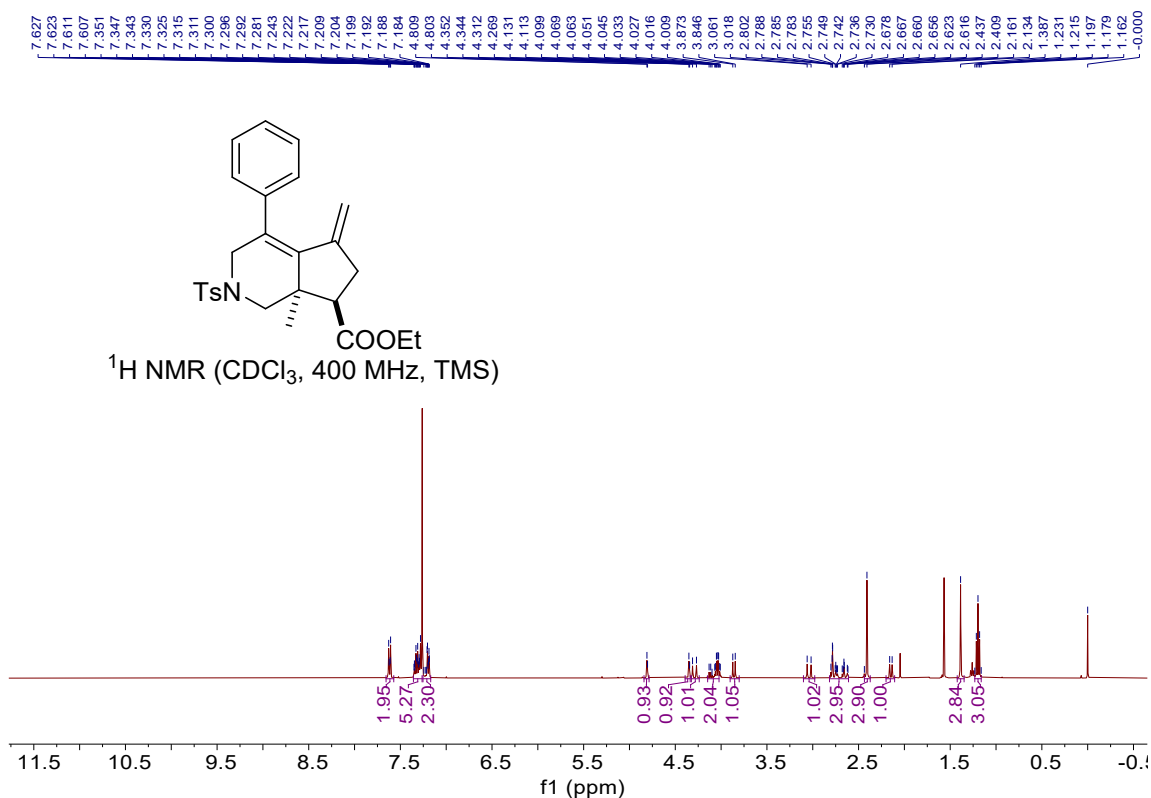

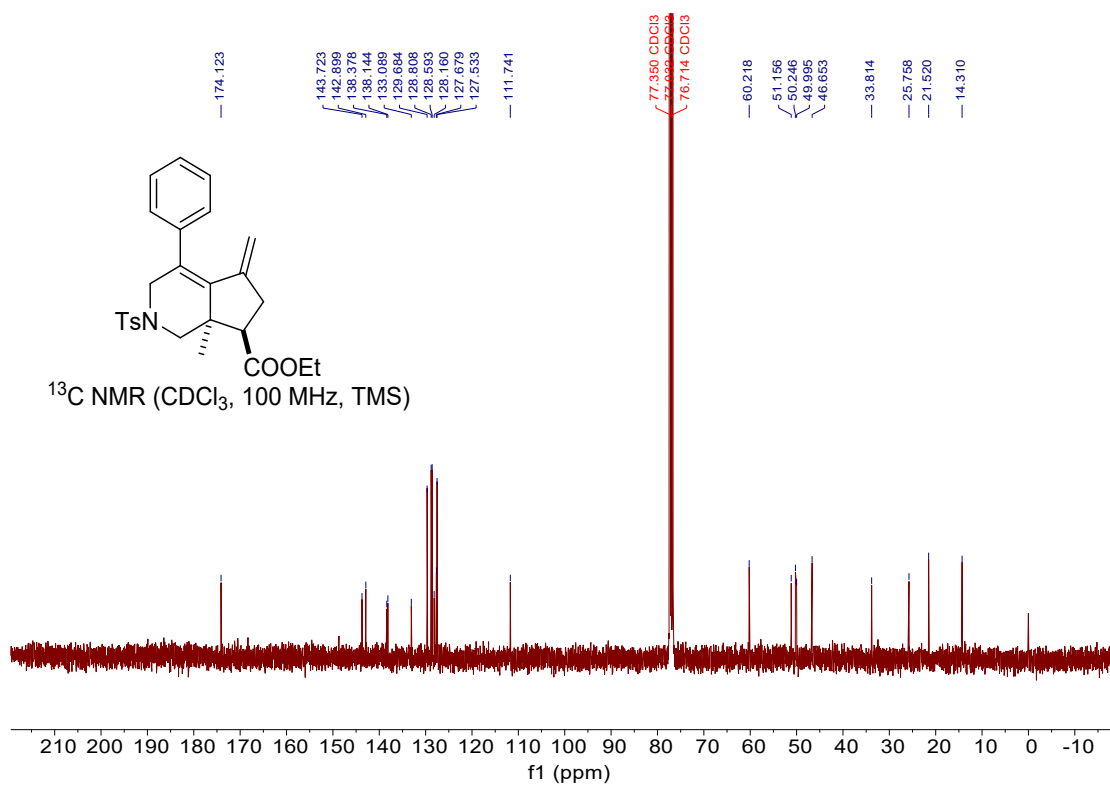

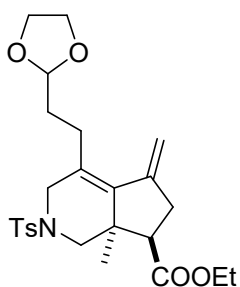

**(trans)-ethyl-4-(2-(1,3-dioxolan-2-yl)ethyl)-7a-methyl-5-methylene-2-tosyl-2,3,5,6,7,7a-hexahydro-1H-cyclopenta[c]pyridine-7-carboxylate (4g)**

A colorless oil, 70% yield, 33.2 mg.  $^1\text{H}$  NMR (400 MHz,  $\text{CDCl}_3$ )  $\delta$  7.69 (d,  $J = 8.0$  Hz, 2H), 7.29 (d,  $J = 8.0$  Hz, 2H), 5.77 (q,  $J = 1.6$  Hz, 1H), 4.41 (d,  $J = 1.6$  Hz, 2H), 4.09 (q,  $J = 7.2$  Hz, 2H), 4.00 – 3.90 (m, 4H), 3.82 – 3.86 (m, 4H), 3.72 (s, 2H), 2.42 (s, 3H), 2.15 – 2.08 (m, 2H), 1.74 – 1.64 (m, 4H), 1.52 – 1.43 (m, 1H), 1.41 – 1.30 (m, 4H).  $^{13}\text{C}$  NMR (100 MHz,  $\text{CDCl}_3$ )  $\delta$  188.2, 166.0, 156.4, 143.3, 136.0, 129.6, 127.5, 118.3, 104.5, 104.0, 101.9, 79.7, 77.3, 64.9, 64.8, 59.7, 53.4, 49.3, 33.8, 31.9, 24.9, 24.0, 22.6, 21.5, 14.2, 7.0. IR (neat)  $\nu$  664, 1091, 1342, 1455, 1718, 2940  $\text{cm}^{-1}$ . HRMS (ESI) calcd. for  $\text{C}_{25}\text{H}_{33}\text{NO}_6\text{SNa}$  ( $\text{M}+\text{Na}$ ) $^+$ : 498.1921, Found: 498.1917.

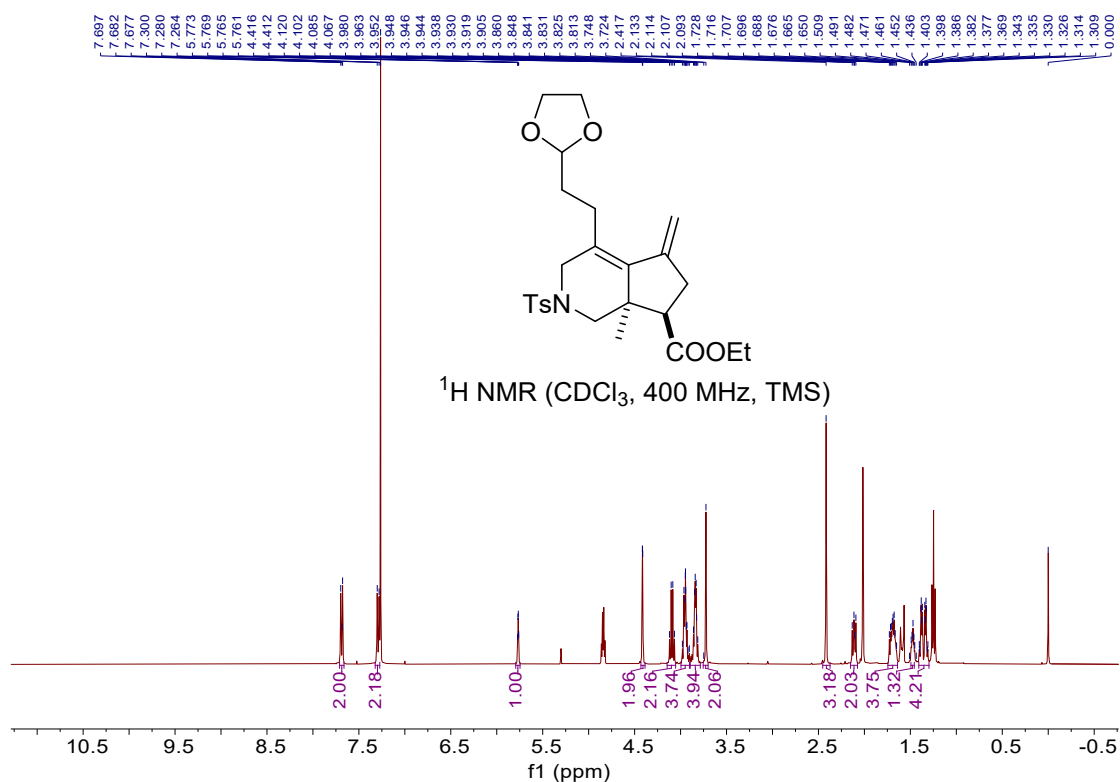

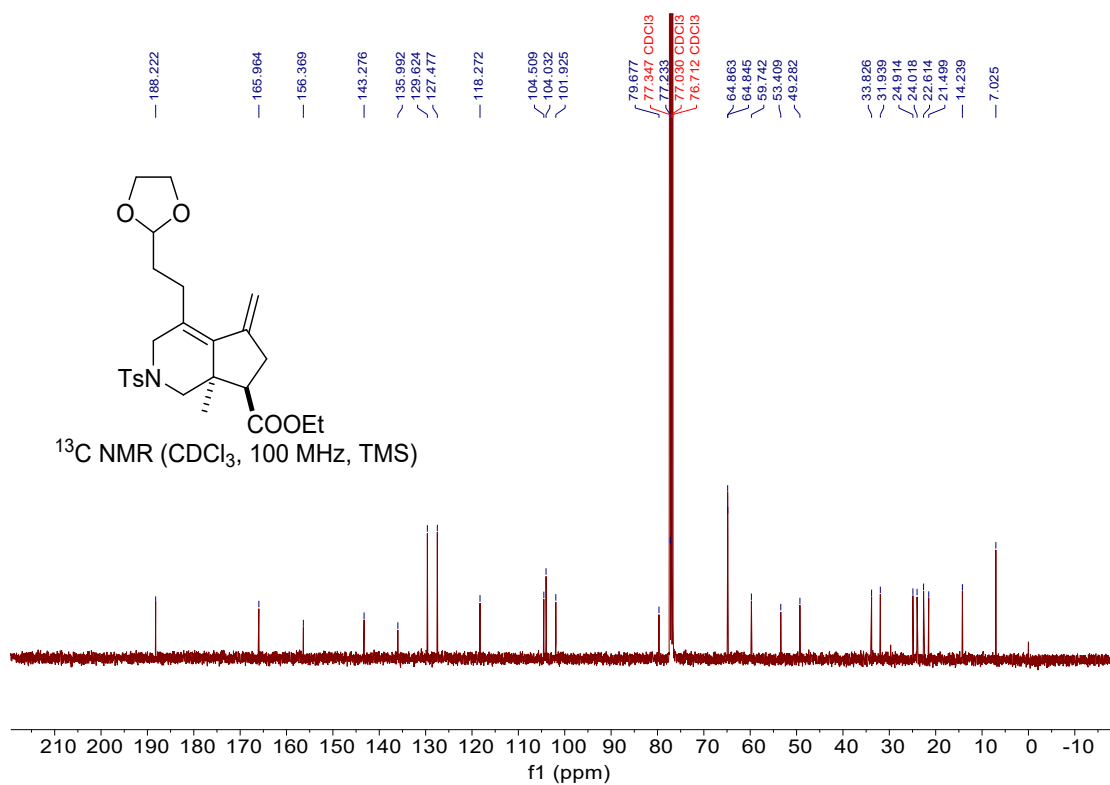

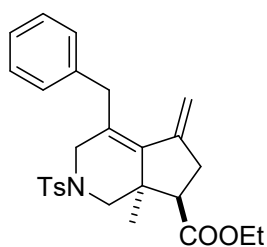

**(trans)-ethyl-4-benzyl-7a-methyl-5-methylene-2-tosyl-2,3,5,6,7,7a-hexahydro-1H-cyclopenta[c]pyridine-7-carboxylate (4h)**

A colorless oil, 90% yield, 41.9 mg.  $^1\text{H}$  NMR (400 MHz,  $\text{CDCl}_3$ )  $\delta$  7.58 (d,  $J = 8.0$  Hz, 2H), 7.29 (d,  $J = 8.0$  Hz, 4H), 7.24 – 7.16 (m, 1H), 7.10 (d,  $J = 8.0$  Hz, 2H), 5.14 (s, 1H), 5.07 (s, 1H), 4.08 – 3.94 (m, 3H), 3.87 (d,  $J = 16.0$  Hz, 1H), 3.80 (d,  $J = 10.8$  Hz, 1H), 3.27 (d,  $J = 16.0$  Hz, 1H), 2.90 (d,  $J = 16.8$  Hz, 1H), 2.79 – 2.76 (m, 2H), 2.41 (s, 3H), 2.06 (d,  $J = 10.8$  Hz, 1H), 1.39 (s, 3H), 1.18 (t,  $J = 7.8$  Hz, 3H).  $^{13}\text{C}$  NMR (100 MHz,  $\text{CDCl}_3$ )  $\delta$  174.1, 143.9, 143.7, 139.2, 138.0, 133.0, 129.6, 128.8, 127.9, 127.5, 126.4, 126.0, 110.5, 60.2, 51.4, 50.1, 48.5, 46.6, 36.2, 34.0, 26.4, 21.5, 14.3. IR (neat)  $\nu$  661, 1091, 1356, 1771, 2926  $\text{cm}^{-1}$ . HRMS (ESI) calcd. for  $\text{C}_{27}\text{H}_{31}\text{NO}_4\text{SNa}$  ( $\text{M}+\text{Na}$ ) $^+$ : 488.1866, Found: 488.1866.

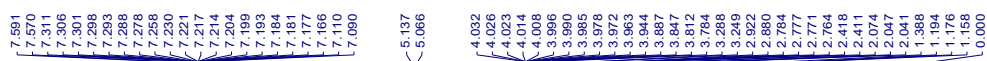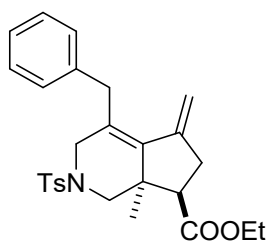

$^1\text{H}$  NMR ( $\text{CDCl}_3$ , 400 MHz, TMS)

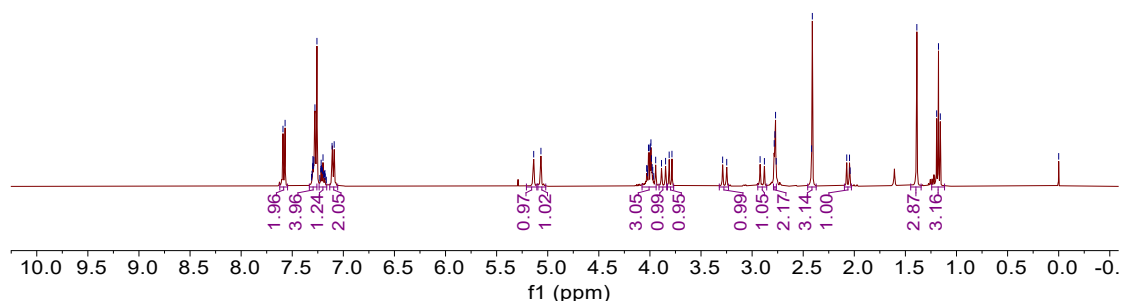

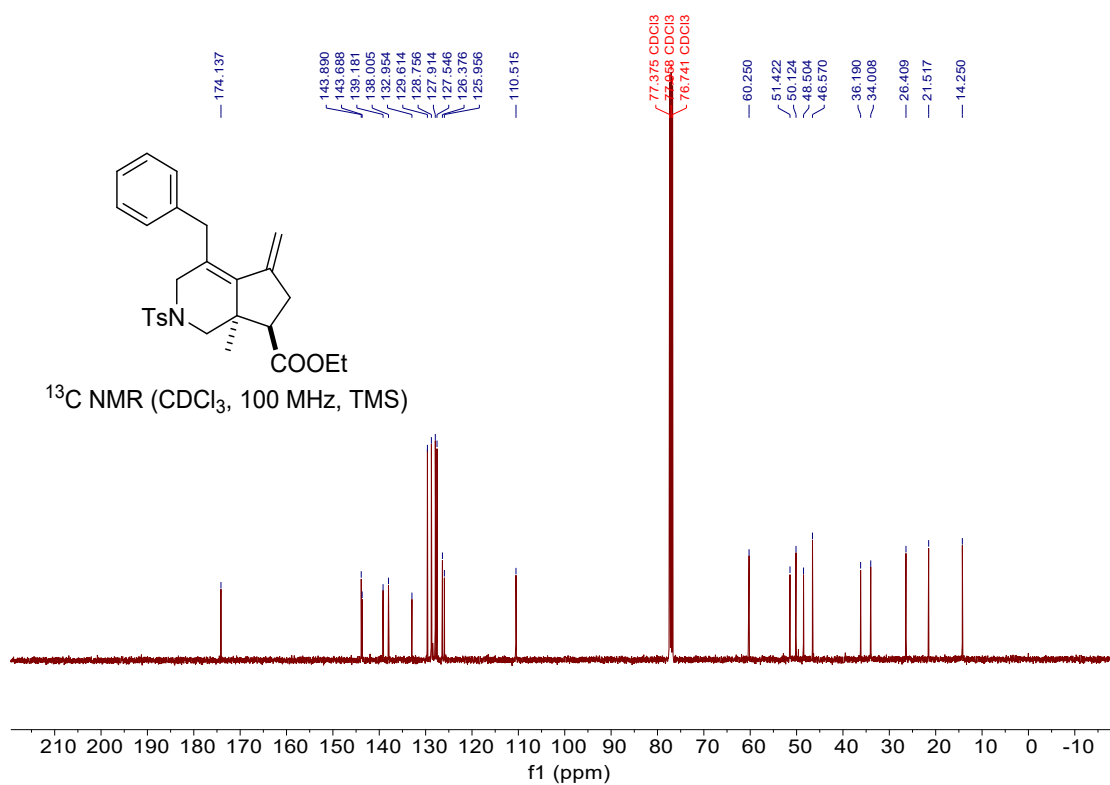

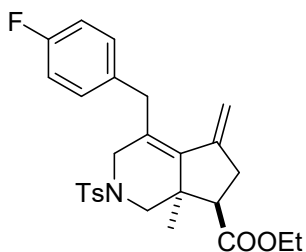

**(trans)-ethyl-4-(4-fluorobenzyl)-7a-methyl-5-methylene-2-tosyl-2,3,5,6,7,7a-hexahydro-1H-cyclopenta[c]pyridine-7-carboxylate (4i)**

A colorless oil, 90% yield, 43.5 mg.  $^1\text{H}$  NMR (400 MHz,  $\text{CDCl}_3$ )  $\delta$  7.58 (d,  $J = 8.0$  Hz, 2H), 7.27 (d,  $J = 8.0$  Hz, 2H), 7.09 – 7.02 (m, 2H), 7.00 – 6.92 (m, 2H), 5.09 (d,  $J = 13.2$  Hz, 2H), 4.00 (qd,  $J = 7.2, 2.0$  Hz, 2H), 3.93 (d,  $J = 16.8$  Hz, 1H), 3.82 – 3.74 (m, 2H), 3.28 (d,  $J = 16.0$  Hz, 1H), 2.88 (d,  $J = 16.8$  Hz, 1H), 2.41 (s, 3H), 2.05 (d,  $J = 9.6$  Hz, 1H), 1.38 (s, 3H), 1.18 (t,  $J = 7.2$  Hz, 3H).  $^{13}\text{C}$  NMR (150 MHz,  $\text{CDCl}_3$ )  $\delta$  174.1, 162.5 (d,  $J_{\text{C-F}} = 243.2$  Hz), 143.9, 143.8, 139.3, 133.56, 133.58, 132.92, 132.90, 129.5 (d,  $J_{\text{C-F}} = 7.8$  Hz), 129.3, 127.5, 125.9, 115.6 (d,  $J_{\text{C-F}} = 21.3$  Hz), 110.5, 77.3, 77.1, 76.8, 60.3, 51.4, 50.1, 48.4, 46.6, 35.4, 34.0, 26.3, 21.5, 14.2.  $^{19}\text{F}$  NMR (565 MHz,  $\text{CDCl}_3$ )  $\delta$  -116.9. IR (neat)  $\nu$  661, 815, 1166, 1355, 1599, 1771, 2978  $\text{cm}^{-1}$ . HRMS (ESI) calcd. for  $\text{C}_{27}\text{H}_{30}\text{NO}_4\text{FSNa}$  ( $\text{M}+\text{Na}$ ) $^+$ : 506.1772, Found: 506.1776.

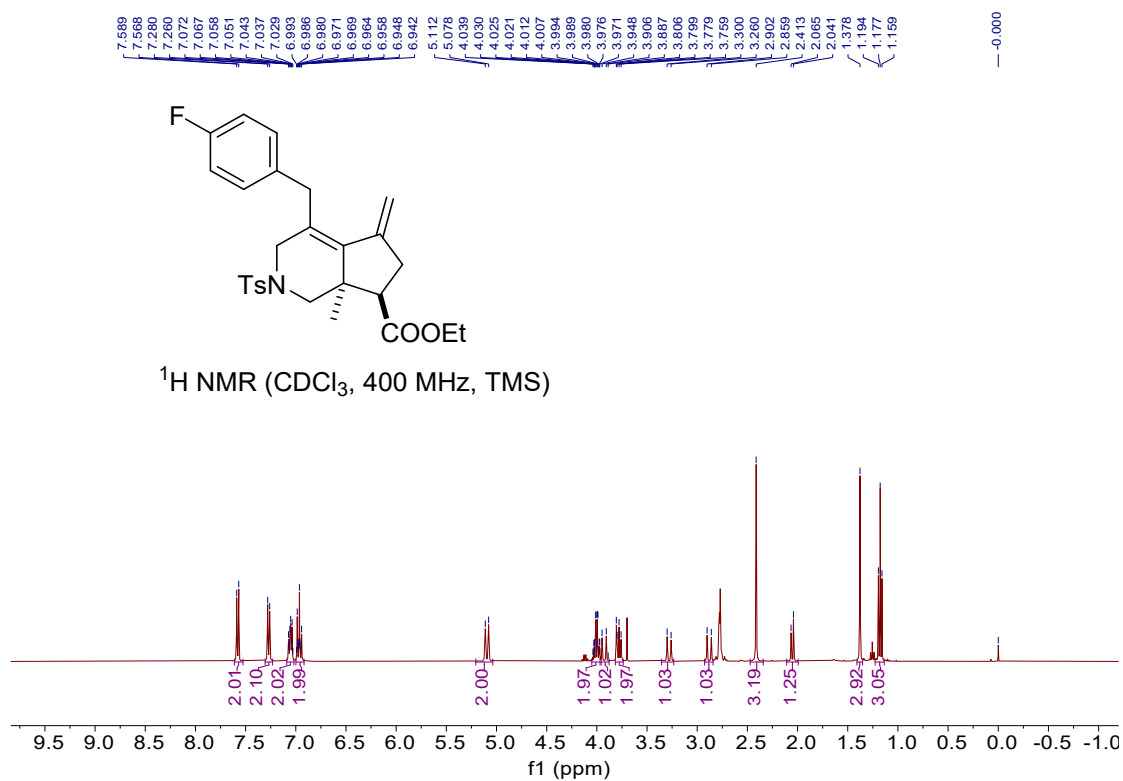



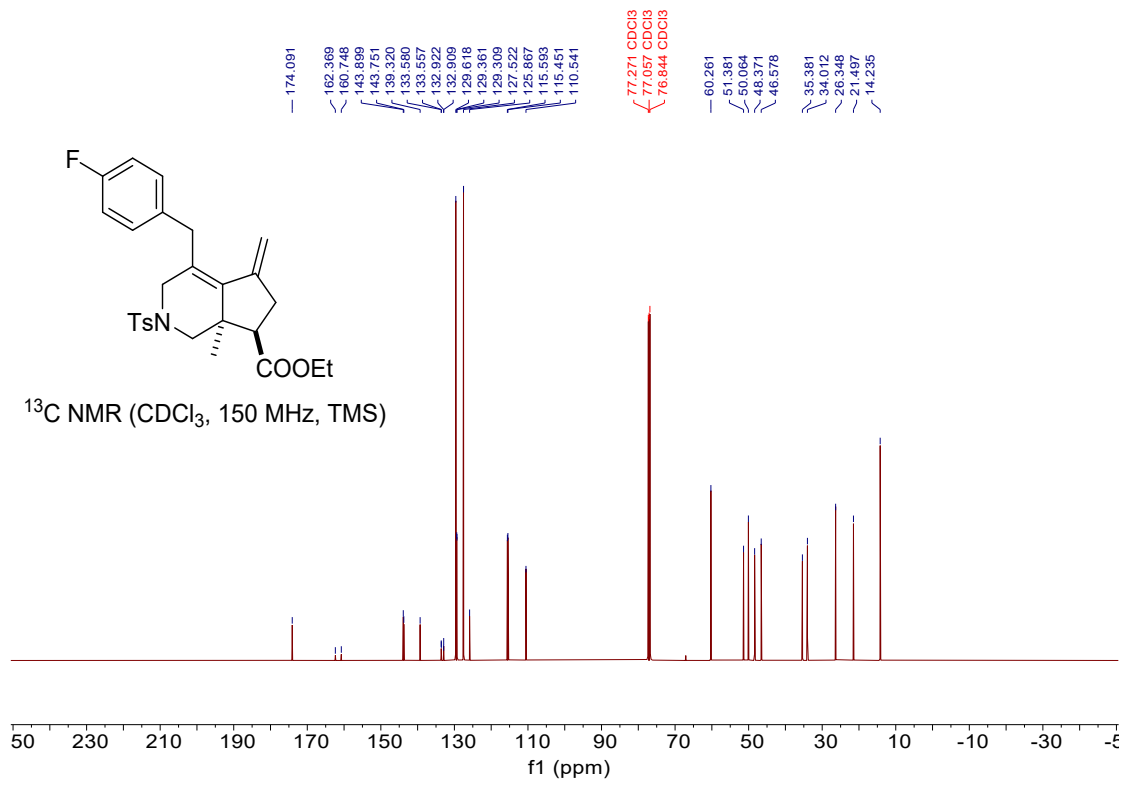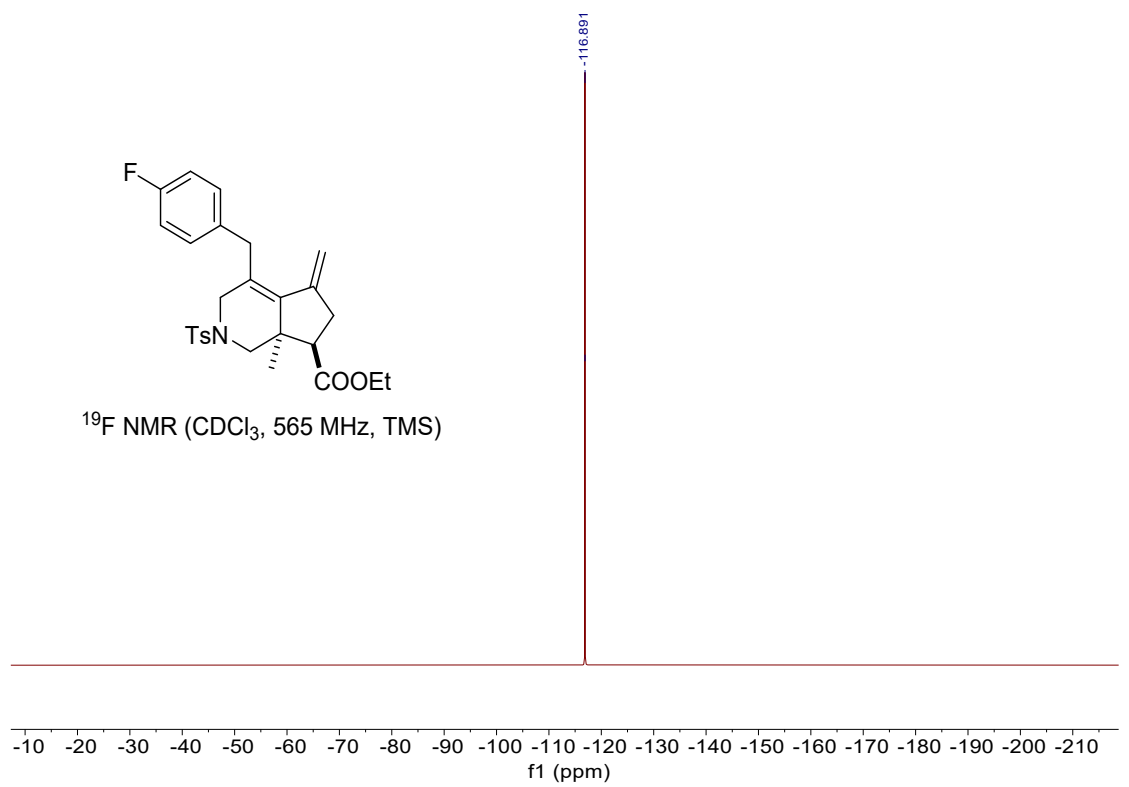

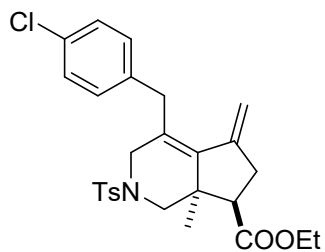

**(trans)-ethyl-4-(4-chlorobenzyl)-7a-methyl-5-methylene-2-tosyl-2,3,5,6,7,7a-hexahydro-1H-cyclopenta[c]pyridine-7-carboxylate (4j)**

A colorless oil, 88% yield, 44.4 mg.  $^1\text{H}$  NMR (400 MHz,  $\text{CDCl}_3$ )  $\delta$  7.58 (d,  $J = 8.0$  Hz, 2H), 7.30 – 7.22 (m, 4H), 7.03 (d,  $J = 8.0$  Hz, 2H), 5.14 – 5.03 (m, 2H), 4.07 – 3.89 (m, 3H), 3.83 – 3.70 (m, 2H), 3.29 (d,  $J = 16.0$  Hz, 1H), 2.93 – 2.84 (m, 1H), 2.80 – 2.72 (m, 3H), 2.42 (d,  $J = 3.2$  Hz, 3H), 2.11 – 2.02 (m, 1H), 1.38 (s, 3H), 1.18 (t,  $J = 7.2$  Hz, 3H).  $^{13}\text{C}$  NMR (100 MHz,  $\text{CDCl}_3$ )  $\delta$  174.1, 143.9, 143.8, 139.6, 136.5, 132.9, 132.2, 129.6, 129.3, 128.9, 127.5, 127.5, 125.5, 110.6, 60.3, 51.4, 50.1, 48.4, 46.6, 35.5, 34.0, 26.3, 21.5, 14.2. IR (neat)  $\nu$  662, 809, 1091, 1349, 1597, 1735, 2949  $\text{cm}^{-1}$ . HRMS (ESI) calcd. for  $\text{C}_{27}\text{H}_{30}\text{NO}_4\text{SClNa}$  ( $\text{M}+\text{Na}$ ) $^+$ : 522.1476, Found: 522.1467.

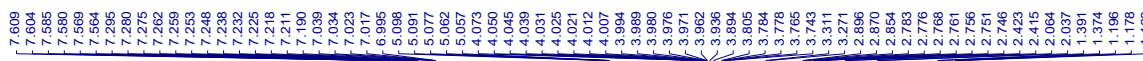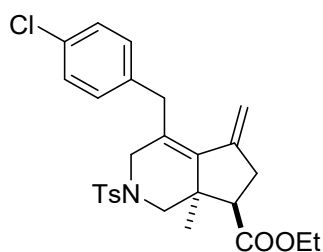

$^1\text{H}$  NMR ( $\text{CDCl}_3$ , 400 MHz, TMS)

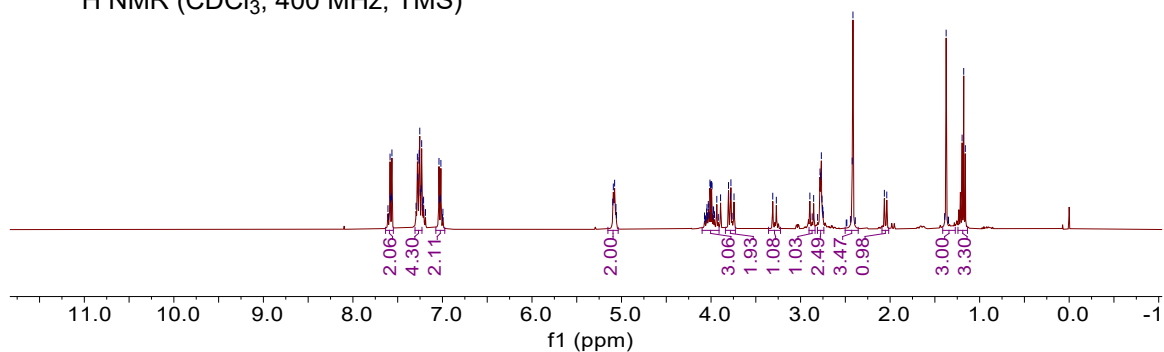

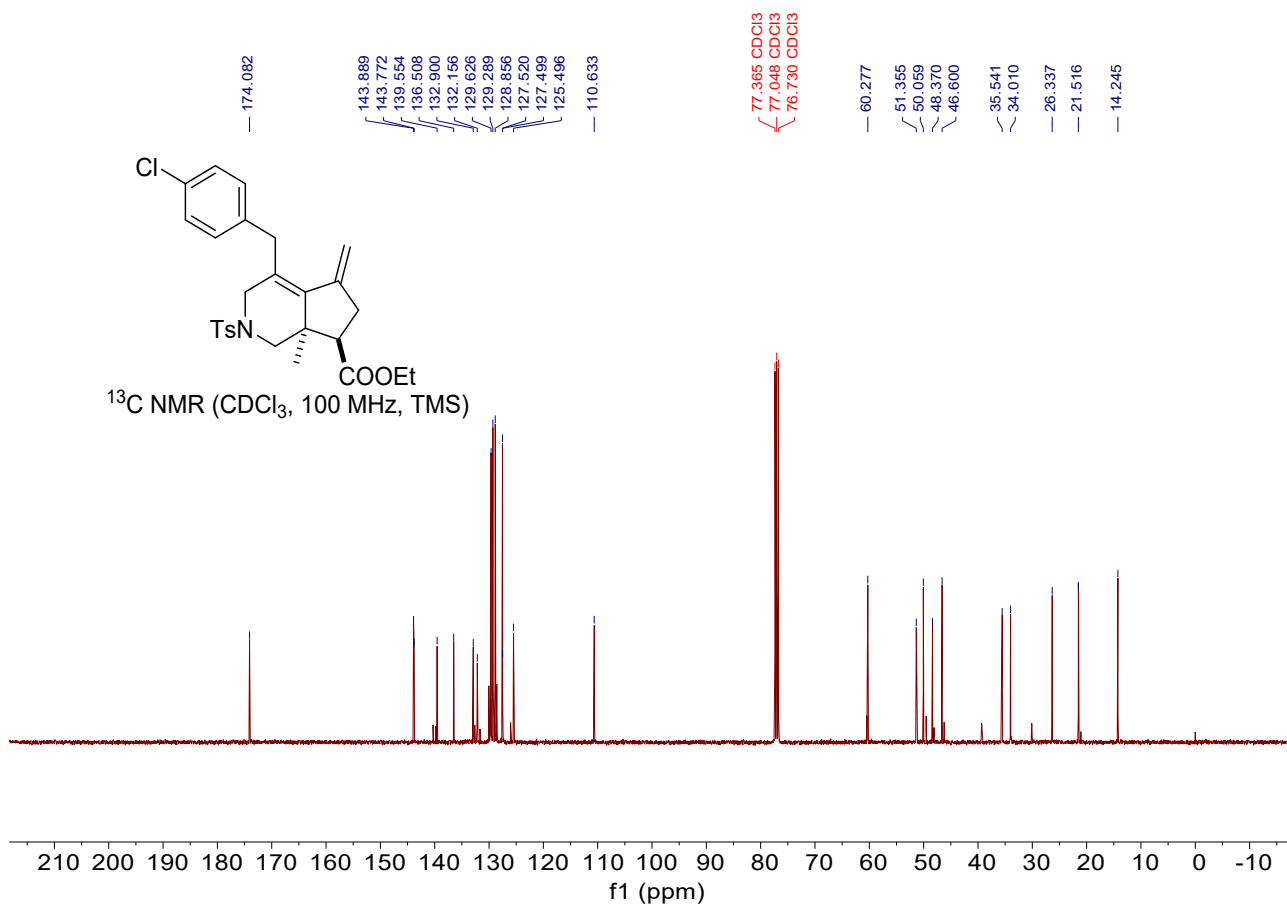

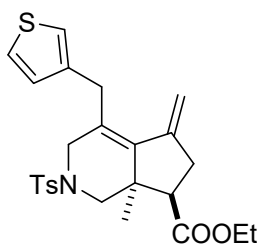

**(trans)-ethyl-7a-methyl-5-methylene-4-(thiophen-3-ylmethyl)-2-tosyl-2,3,5,6,7,7a-hexahydro-1H-cyclopenta[c]pyridine-7-carboxylate (4k)**

A colorless oil, 80% yield, 37.8 mg.  $^1\text{H}$  NMR (400 MHz,  $\text{CDCl}_3$ )  $\delta$  7.60 (d,  $J = 8.0$  Hz, 2H), 7.31 – 7.23 (m, 3H), 6.92 – 6.80 (m, 2H), 5.16 (s, 1H), 5.09 (s, 1H), 4.07 – 3.95 (m, 3H), 3.84 – 3.71 (m, 2H), 3.26 (d,  $J = 16.0$  Hz, 1H), 2.92 (d,  $J = 16.8$  Hz, 1H), 2.76 (td,  $J = 5.6, 2.4$  Hz, 3H), 2.42 (s, 3H), 2.09 – 2.01 (m, 1H), 1.36 (s, 3H), 1.18 (t,  $J = 7.2$  Hz, 3H).  $^{13}\text{C}$  NMR (100 MHz,  $\text{CDCl}_3$ )  $\delta$  174.1, 143.8, 143.7, 138.5, 138.4, 133.0, 129.6, 127.8, 127.6, 126.2, 126.0, 120.9, 110.8, 60.2, 51.4, 50.1, 48.5, 46.6, 34.0, 31.5, 26.3, 21.5, 14.3. IR (neat)  $\nu$  660, 917, 1220, 1418, 1724, 2981  $\text{cm}^{-1}$ . HRMS (ESI) calcd. for  $\text{C}_{25}\text{H}_{29}\text{NO}_4\text{S}_2\text{Na}$  ( $\text{M}+\text{Na}$ ) $^+$ : 494.1430, Found: 494.1436.

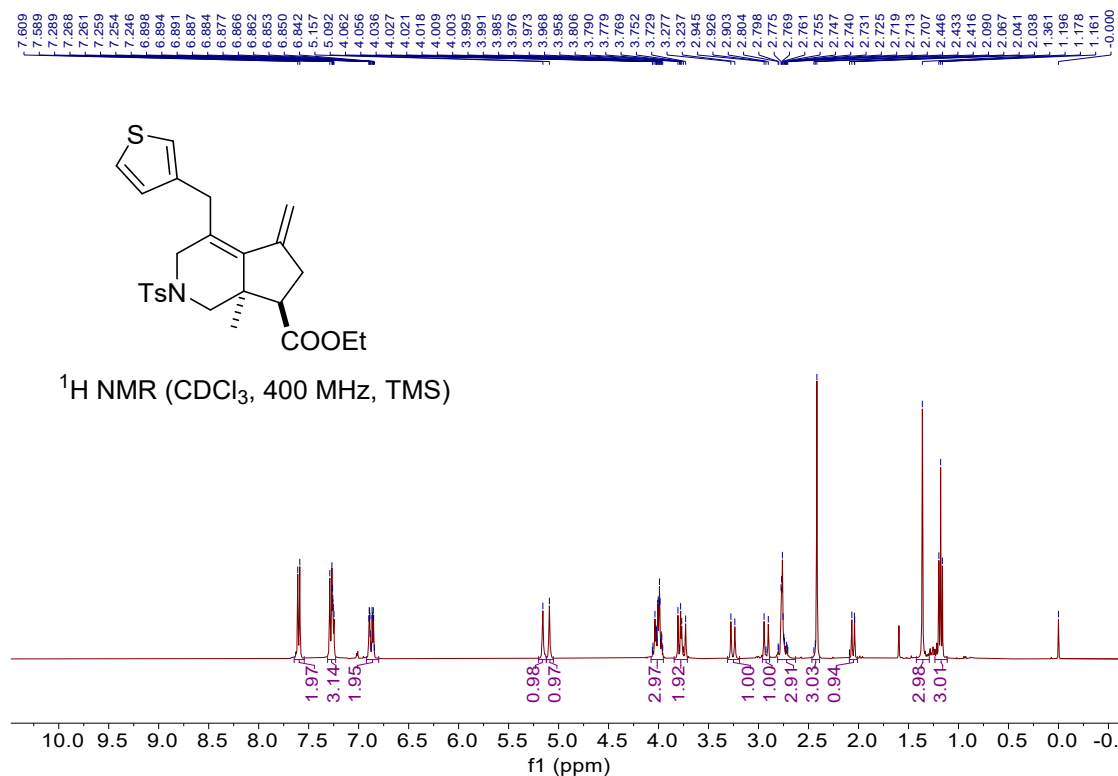

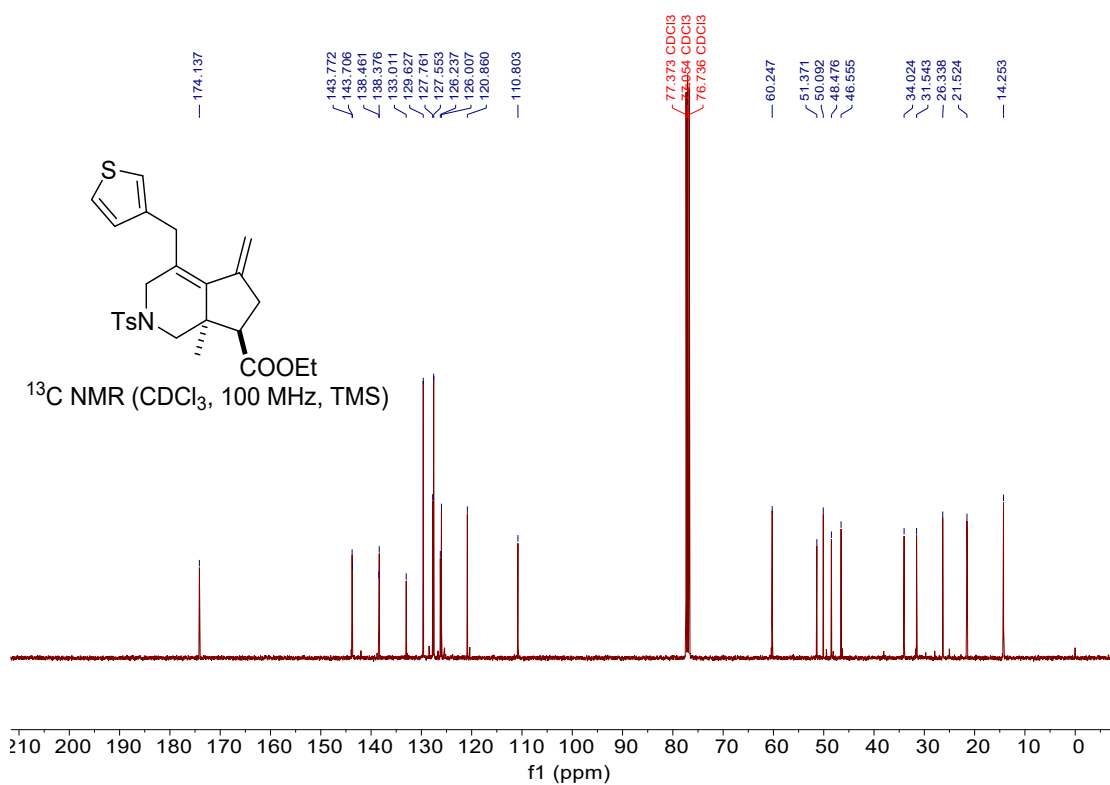

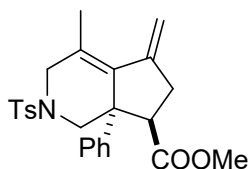

**(trans)-ethyl-4-benzyl-7a-methyl-5-methylene-2-tosyl-2,3,5,6,7,7a-hexahydro-1H-cyclopenta[c]pyridine-7-carboxylate (4l)**

A colorless oil, 70% yield, 30.6 mg.  $^1\text{H}$  NMR (400 MHz,  $\text{CDCl}_3$ )  $\delta$  7.32 – 7.19 (m, 7H), 7.13 (d,  $J = 8.0$  Hz, 2H), 5.32 (s, 1H), 5.17 (s, 1H), 4.28 (d,  $J = 11.2$  Hz, 1H), 3.79 (d,  $J = 17.2$  Hz, 1H), 3.66 (s, 3H), 3.31 – 3.20 (m, 2H), 2.59 (dd,  $J = 16.8, 1.6$  Hz, 1H), 2.46 (d,  $J = 11.2$  Hz, 1H), 2.37 (s, 4H), 1.97 (s, 3H).  $^{13}\text{C}$  NMR (100 MHz,  $\text{CDCl}_3$ )  $\delta$  174.2, 145.5, 144.2, 143.3, 134.0, 133.8, 129.4, 128.4, 127.6, 127.6, 127.4, 126.8, 110.3, 55.3, 52.2, 51.6, 51.5, 49.3, 34.2, 21.5, 17.6. IR (neat)  $\nu$  660, 789, 1106, 1351, 1599, 1735, 2951  $\text{cm}^{-1}$ . HRMS (ESI) calcd. for  $\text{C}_{25}\text{H}_{27}\text{NO}_4\text{SNa}$  ( $\text{M}+\text{Na}$ ) $^+$ : 460.1553, Found: 460.1551.

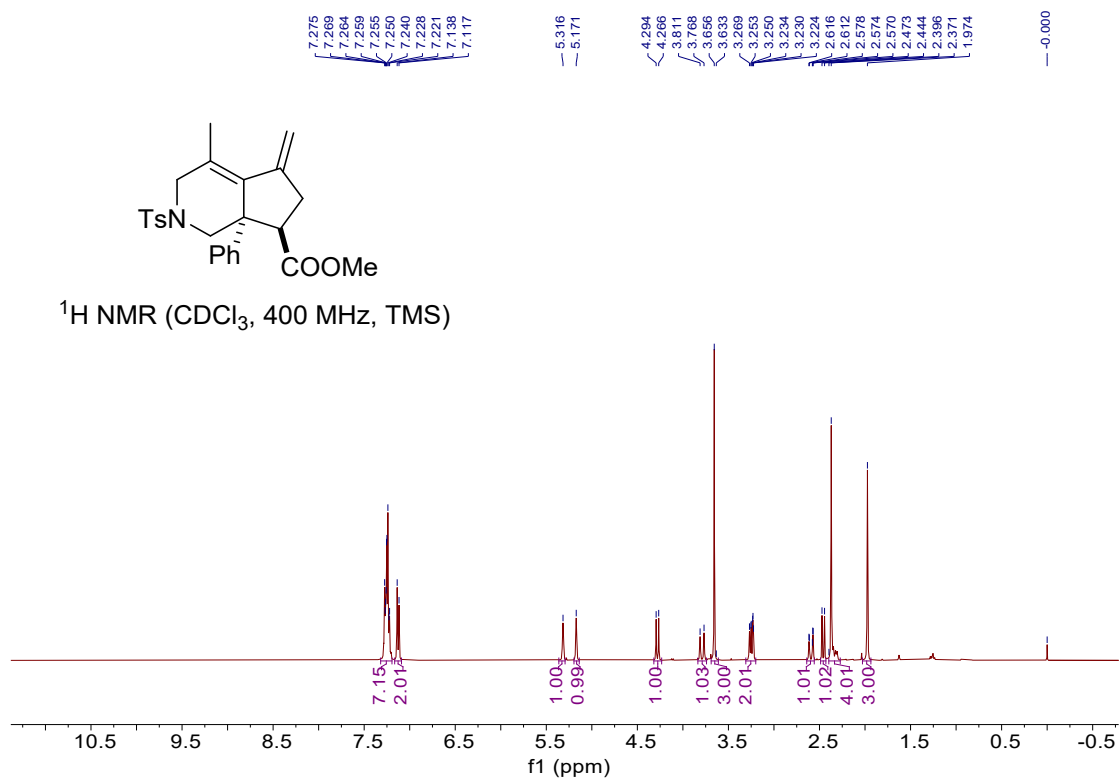

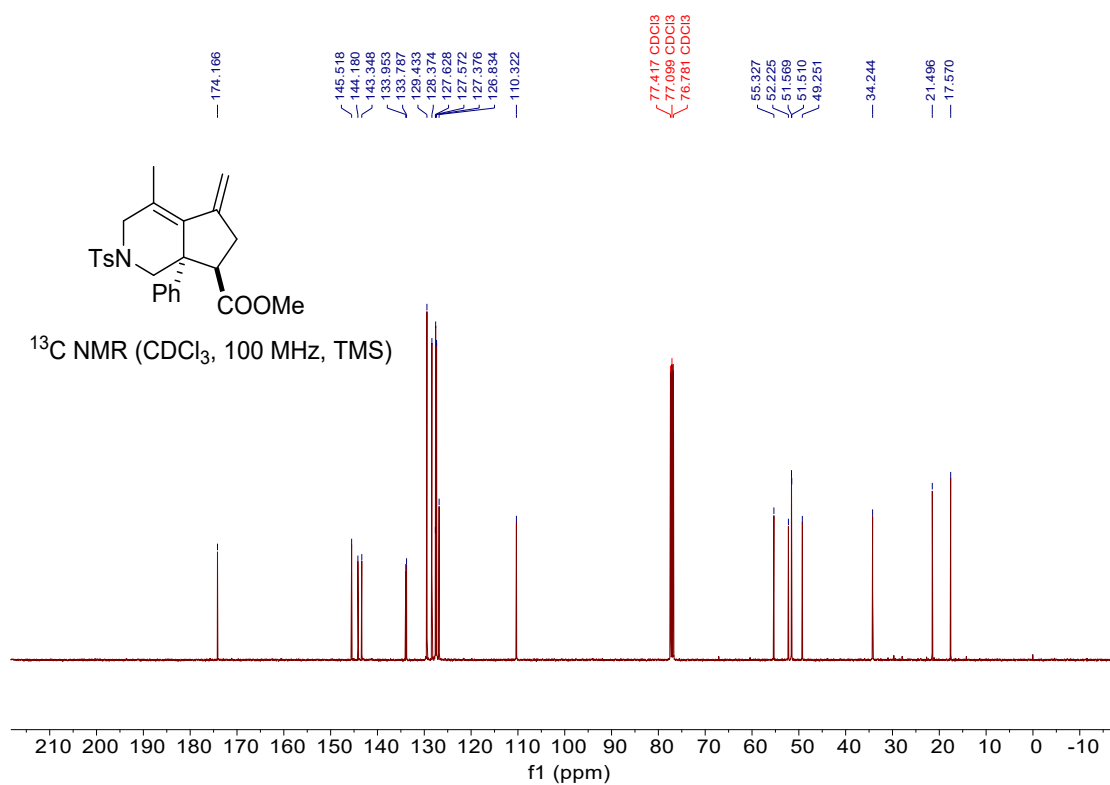

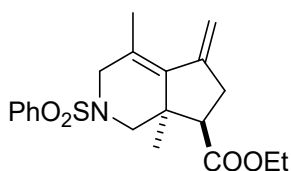

**(trans)-ethyl-4-benzyl-7a-methyl-5-methylene-2-tosyl-2,3,5,6,7,7a-hexahydro-1H-cyclopenta[c]pyridine-7-carboxylate (4m)**

A colorless oil, 90% yield, 33.8 mg.  $^1\text{H}$  NMR (400 MHz,  $\text{CDCl}_3$ )  $\delta$  7.83 – 7.74 (m, 2H), 7.62 – 7.57 (m, 1H), 7.55 – 7.46 (m, 2H), 5.18 (t,  $J = 2.4$  Hz, 2H), 4.05 – 3.92 (m, 3H), 3.79 (dd,  $J = 10.8, 0.8$  Hz, 1H), 2.96 (dd,  $J = 16.8, 1.6$  Hz, 1H), 2.80 – 2.64 (m, 3H), 2.07 – 2.00 (m, 1H), 1.79 (s, 3H), 1.29 (d,  $J = 0.8$  Hz, 3H), 1.16 (t,  $J = 7.2$  Hz, 3H).  $^{13}\text{C}$  NMR (100 MHz,  $\text{CDCl}_3$ )  $\delta$  174.1, 144.6, 136.5, 136.2, 132.9, 129.1, 127.5, 123.9, 110.7, 60.1, 51.3, 50.1, 49.5, 46.5, 34.1, 26.1, 17.2, 14.2. IR (neat)  $\nu$  690, 752, 1150, 1353, 1652, 1713, 2980  $\text{cm}^{-1}$ . HRMS (ESI) calcd. for  $\text{C}_{20}\text{H}_{25}\text{NO}_4\text{SNa}$  ( $\text{M}+\text{Na}$ ) $^+$ : 398.1396, Found: 398.1395.

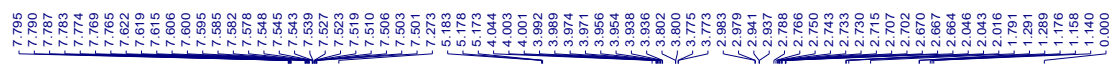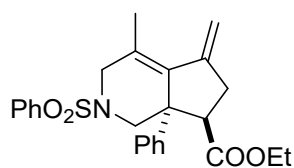

$^1\text{H}$  NMR ( $\text{CDCl}_3$ , 400 MHz, TMS)

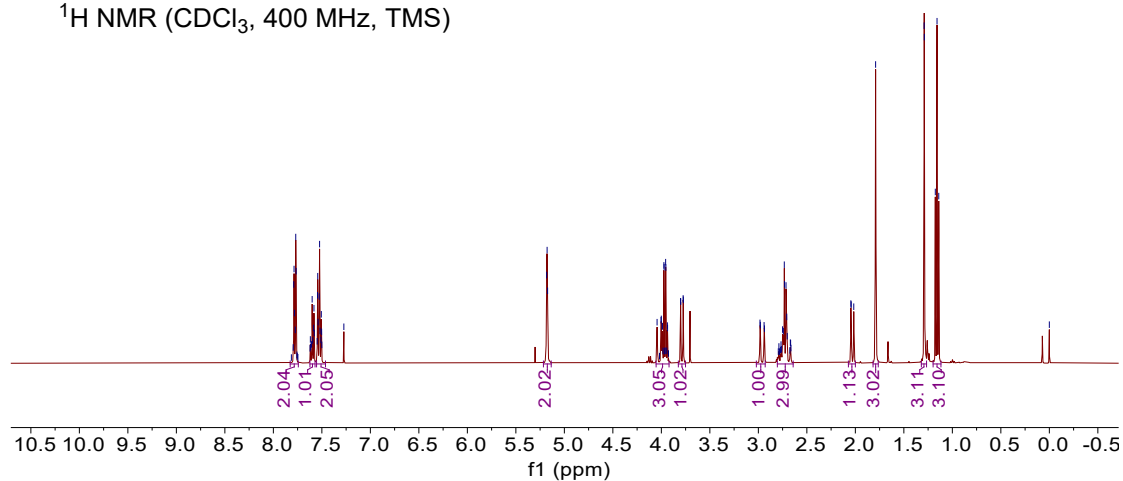



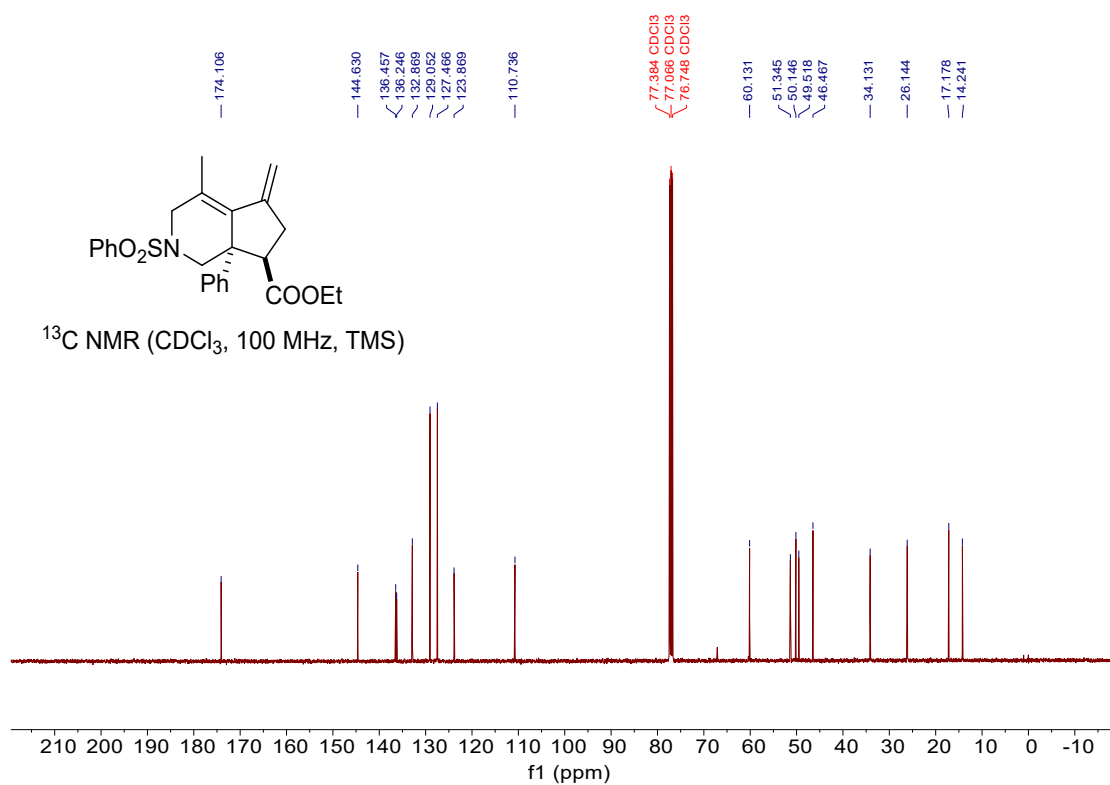

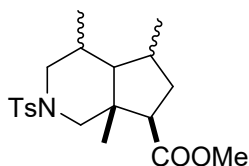

**(cis)-methyl-4,5,7a-trimethyl-2-tosyl-1H-cyclopenta[c]pyridine-7-carboxylate (5)**

A yellow oil, 98% yield, 36.7 mg.  $^1\text{H}$  NMR (400 MHz,  $\text{CDCl}_3$ )  $\delta$  7.74 – 7.61 (m, 2H), 7.37 – 7.29 (m, 2H), 3.98 – 3.87 (m, 1H), 3.77 – 3.25 (m, 4H), 2.91 – 2.77 (m, 1H), 2.71 – 2.55 (m, 1H), 2.51 – 2.38 (m, 3H), 2.34 – 2.02 (m, 3H), 1.95 – 1.70 (m, 1H), 1.66 – 1.43 (m, 3H), 1.41 – 0.72 (m, 8H).  $^{13}\text{C}$  NMR (100 MHz,  $\text{CDCl}_3$ )  $\delta$  174.0, 173.1, 172.8, 143.3, 143.3, 143.3, 143.2, 138.2, 133.8, 129.7, 129.6, 129.6, 127.6, 127.6, 127.5, 127.4, 127.3, 120.3, 59.5, 58.4, 54.9, 53.2, 52.7, 52.4, 52.1, 51.8, 51.7, 51.5, 51.2, 49.3, 49.1, 48.5, 45.1, 45.0, 36.9, 36.8, 34.6, 33.9, 33.3, 33.1, 29.5, 23.3, 22.9, 21.8, 21.5, 21.5, 21.2, 20.1, 19.7, 17.7, 17.4, 15.4, 13.2. IR (neat)  $\nu$  665, 886, 1350, 1715, 2962  $\text{cm}^{-1}$ . HRMS (ESI) calcd. for  $\text{C}_{20}\text{H}_{29}\text{NO}_4\text{SNa}$  ( $\text{M}+\text{Na}$ ) $^+$ : 402.1710, Found: 402.1705.

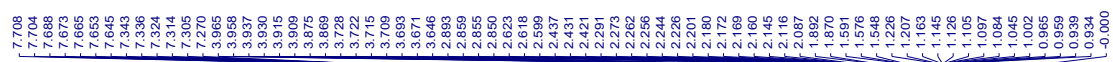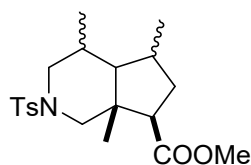

$^1\text{H}$  NMR ( $\text{CDCl}_3$ , 400 MHz, TMS)

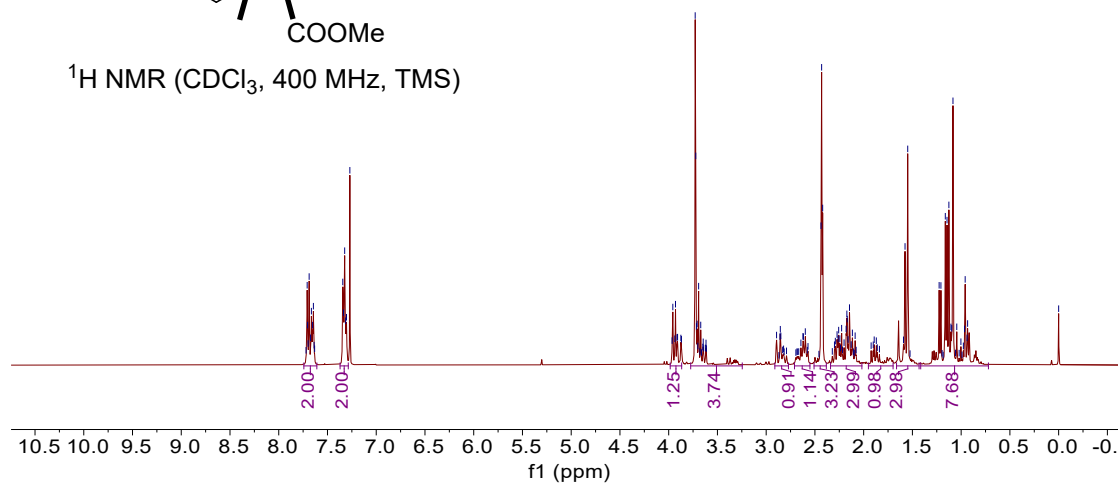

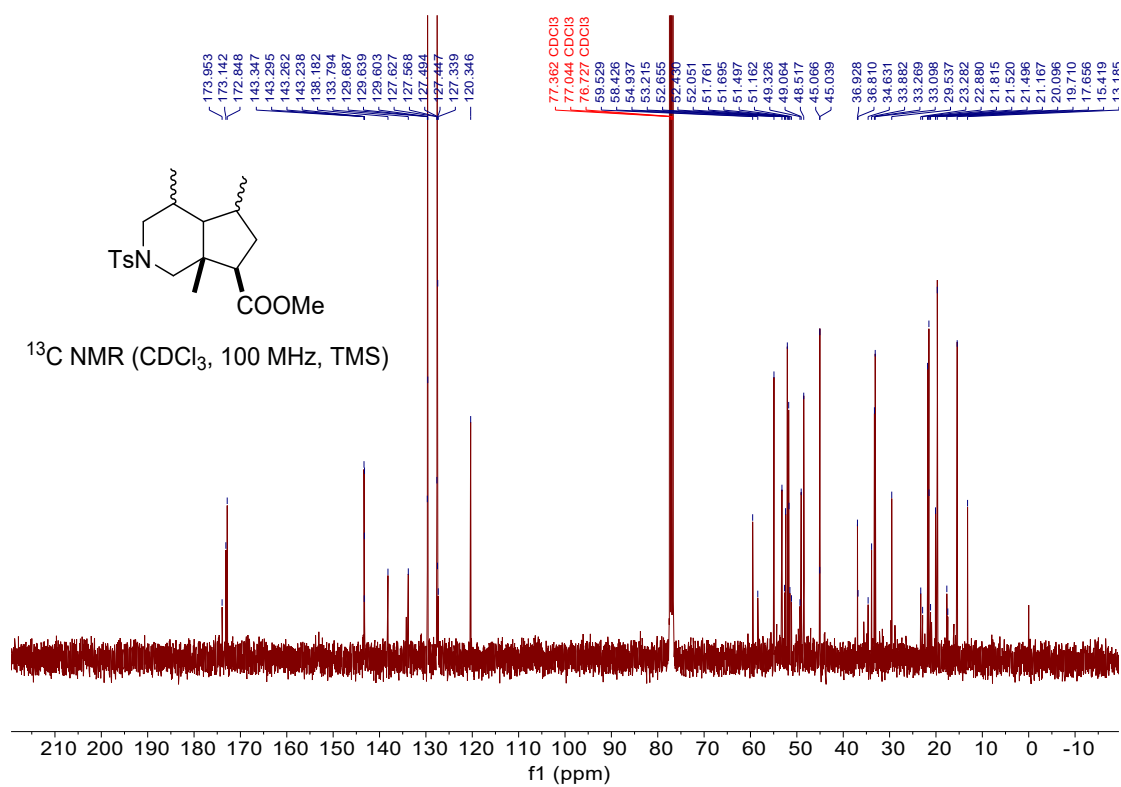

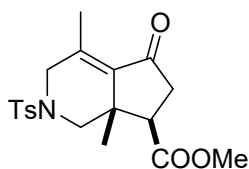

**(cis)-methyl-4,7a-dimethyl-5-oxo-2-tosyl-2,3,5,6,7,7a-hexahydro-1H-cyclopenta[c]pyridine-7-carboxylate (6)**

A white oil, 96% yield, 36.2 mg.  $^1\text{H}$  NMR (400 MHz,  $\text{CDCl}_3$ )  $\delta$  7.72 (d,  $J = 8.0$  Hz, 2H), 7.37 (d,  $J = 8.0$  Hz, 2H), 4.19 – 4.09 (m, 2H), 3.80 (s, 3H), 3.10 (d,  $J = 18.8$  Hz, 1H), 2.91 (dd,  $J = 18.8, 11.9$  Hz, 1H), 2.66 (dd,  $J = 11.6, 8.1$  Hz, 1H), 2.47 – 2.39 (m, 4H), 2.35 (d,  $J = 11.6$  Hz, 1H), 2.04 (s, 3H), 1.14 (s, 3H).  $^{13}\text{C}$  NMR (100 MHz,  $\text{CDCl}_3$ )  $\delta$  202.3, 171.6, 143.9, 140.9, 135.8, 133.5, 129.9, 127.5, 54.2, 52.3, 49.3, 47.3, 43.2, 38.6, 21.6, 20.1, 15.8. IR (neat)  $\nu$  666, 1086, 1350, 1697, 1716, 2962  $\text{cm}^{-1}$ . HRMS (ESI) calcd. for  $\text{C}_{19}\text{H}_{23}\text{NO}_5\text{SNa}$  ( $\text{M}+\text{Na}$ ) $^+$ : 400.1189, Found: 400.1190.

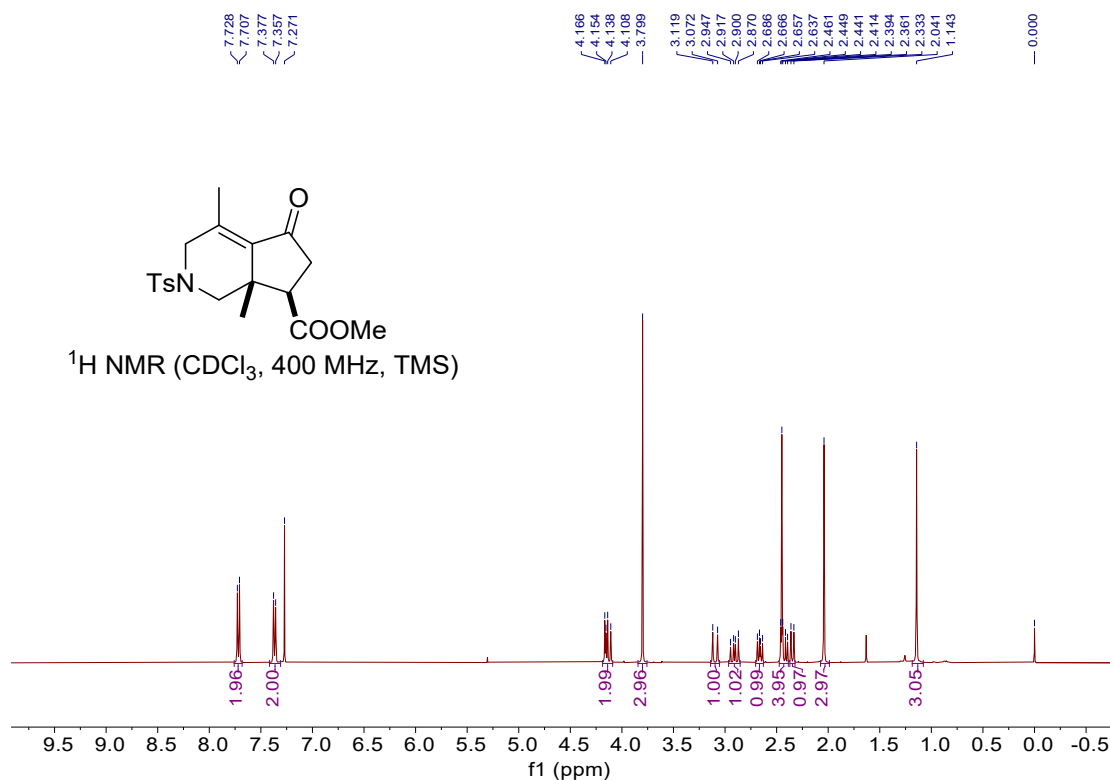

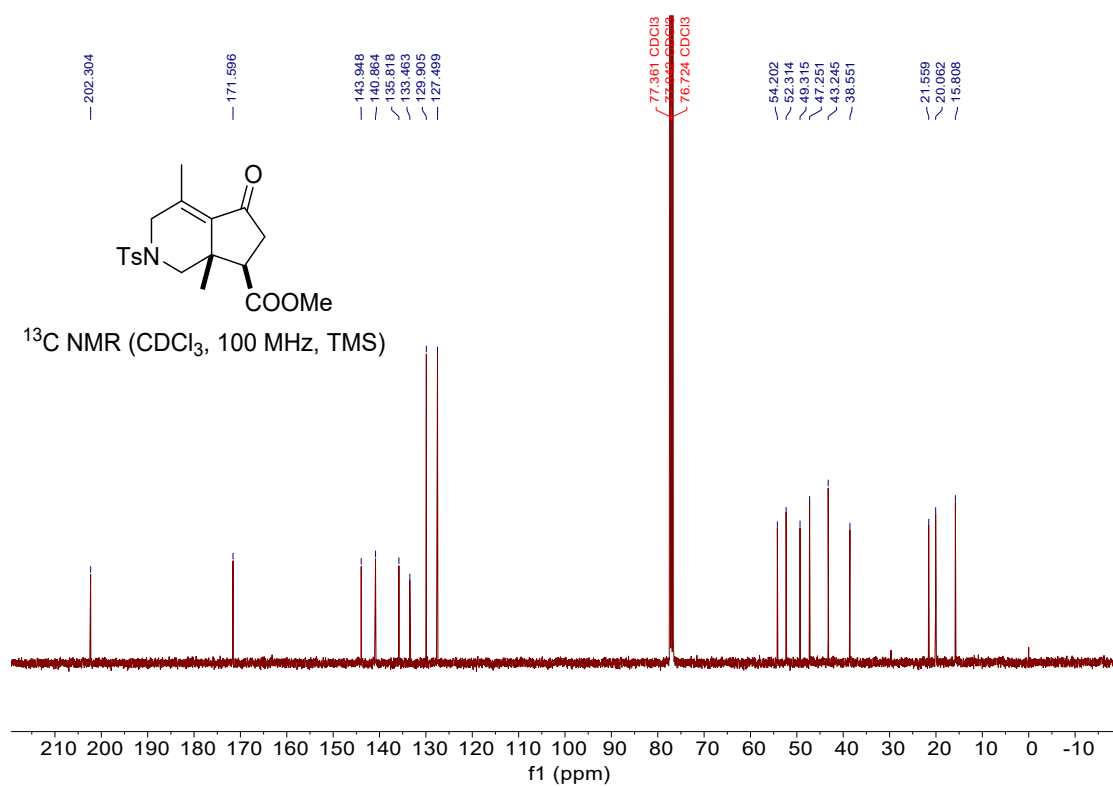

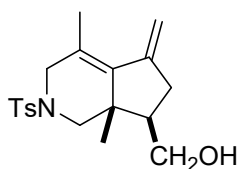

**(cis)-4,7a-dimethyl-5-methylene-2-tosyl-2,3,5,6,7,7a-hexahydro-1H-cyclopenta[c]pyridin-7-yl)methanol (7)**

A yellow oil, 96% yield, 33.4 mg.  $^1\text{H}$  NMR (400 MHz,  $\text{CDCl}_3$ )  $\delta$  7.69 (d,  $J = 8.0$  Hz, 2H), 7.32 (d,  $J = 8.0$  Hz, 2H), 5.15 – 5.05 (m, 2H), 4.09 – 3.93 (m, 2H), 3.76 – 3.64 (m, 2H), 2.96 (dd,  $J = 16.8, 1.4$  Hz, 1H), 2.57 – 2.46 (m, 1H), 2.42 (s, 3H), 2.24 – 2.13 (m, 2H), 1.80 – 1.70 (m, 4H), 1.07 (s, 3H).  $^{13}\text{C}$  NMR (100 MHz,  $\text{CDCl}_3$ )  $\delta$  144.8, 143.4, 139.7, 133.6, 129.7, 127.6, 123.0, 110.5, 63.2, 54.9, 49.5, 47.3, 44.7, 34.1, 21.5, 17.6, 17.1. IR (neat)  $\nu$  665, 1021, 1333, 1597, 2924  $\text{cm}^{-1}$ . HRMS (ESI) calcd. for  $\text{C}_{19}\text{H}_{25}\text{NO}_3\text{SNa}$  ( $\text{M}+\text{Na}$ ) $^+$ : 370.1447, Found: 370.1442.

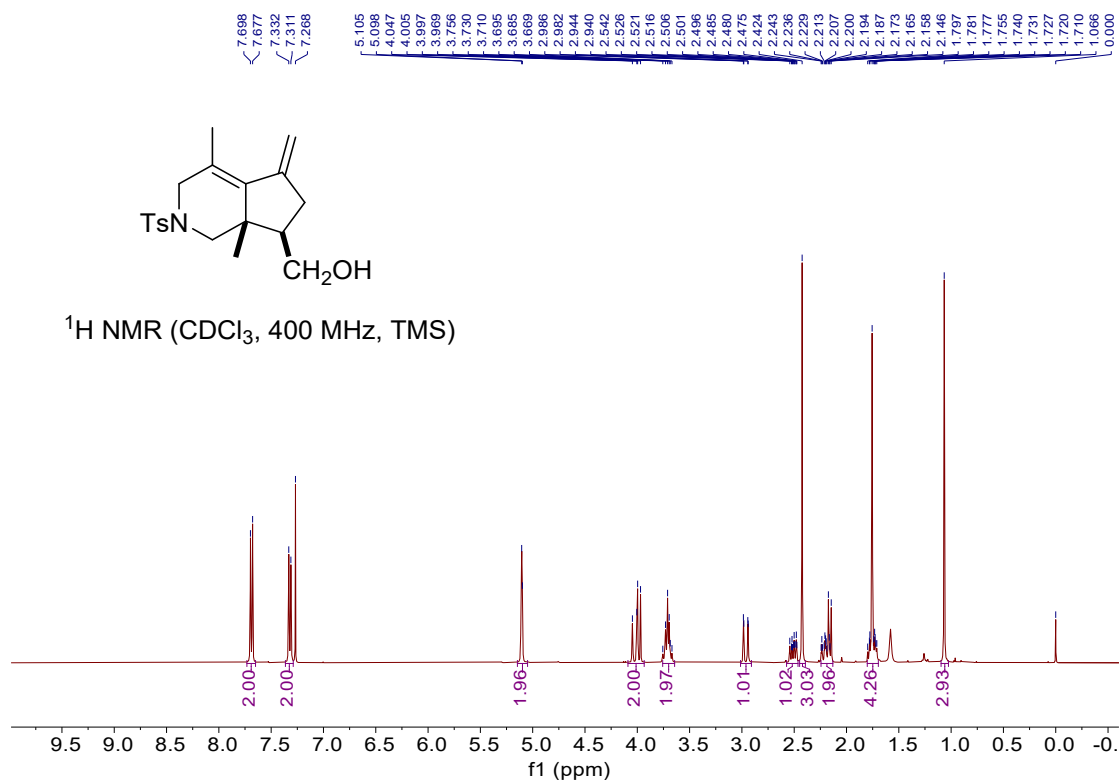

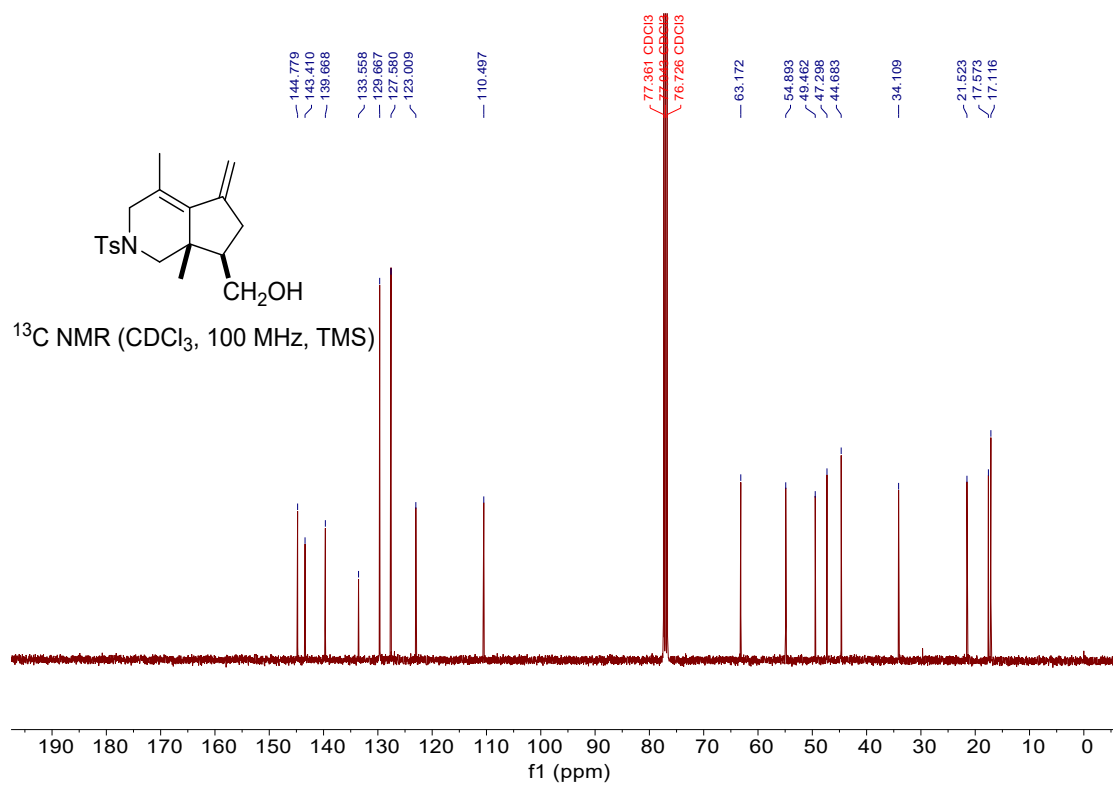

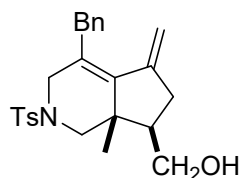

**(cis)-4-benzyl-7a-methyl-5-methylene-2-tosyl-2,3,5,6,7,7a-hexahydro-1H-cyclopenta[c]pyridin-7-yl)methanol (8)**

A yellow oil, 98% yield, 44.2 mg.  $^1\text{H}$  NMR (400 MHz,  $\text{CDCl}_3$ )  $\delta$  7.65 – 7.58 (m, 2H), 7.32 – 7.25 (m, 4H), 7.25 – 7.20 (m, 1H), 7.13 – 7.06 (m, 2H), 5.07 (d,  $J = 2.4$  Hz, 1H), 4.99 (d,  $J = 2.4$  Hz, 1H), 4.06 – 3.96 (m, 2H), 3.85 (d,  $J = 16.0$  Hz, 1H), 3.80 – 3.67 (m, 2H), 3.20 (d,  $J = 16.0$  Hz, 1H), 2.93 (d,  $J = 16.8$  Hz, 1H), 2.62 – 2.51 (m, 1H), 2.41 (s, 3H), 2.29 – 2.17 (m, 2H), 1.90 – 1.78 (m, 1H), 1.18 (s, 3H).  $^{13}\text{C}$  NMR (100 MHz,  $\text{CDCl}_3$ )  $\delta$  143.9, 143.4, 142.4, 138.1, 129.6, 128.7, 127.8, 127.6, 126.3, 124.9, 110.2, 63.1, 55.0, 48.5, 47.2, 44.9, 36.0, 33.8, 21.5, 17.8. IR (neat)  $\nu$  667, 1022, 1363, 1596, 2924  $\text{cm}^{-1}$ . HRMS (ESI) calcd. for  $\text{C}_{25}\text{H}_{29}\text{NO}_3\text{SNa}$  ( $\text{M}+\text{Na}$ ) $^+$ : 446.1760, Found: 446.1760.

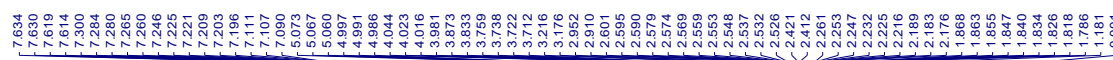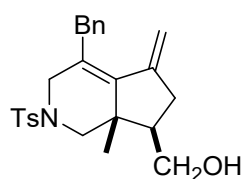

$^1\text{H}$  NMR ( $\text{CDCl}_3$ , 400 MHz, TMS)

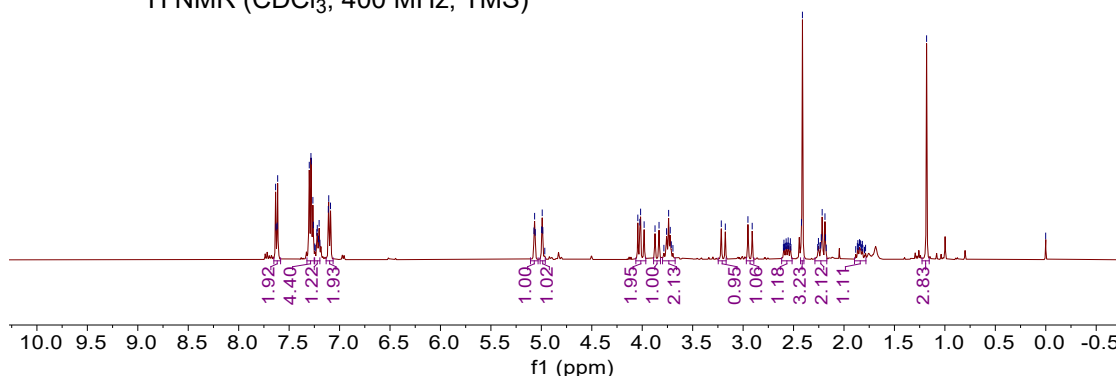



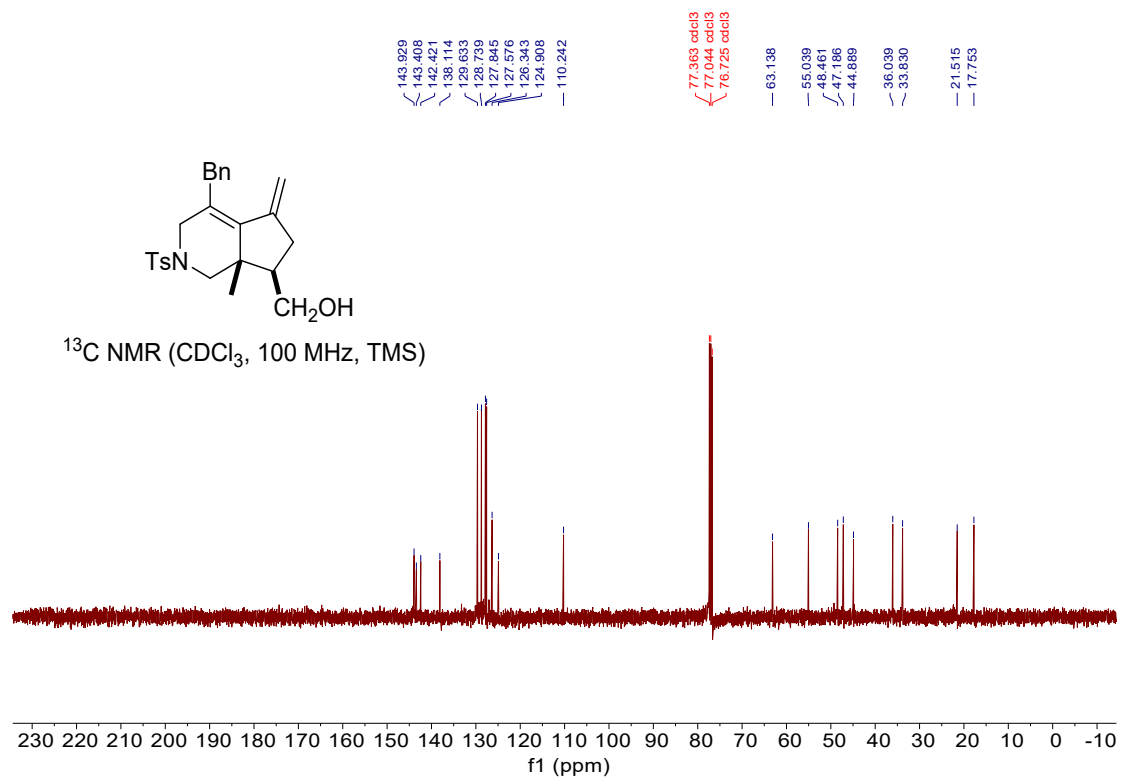

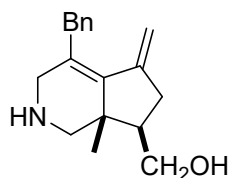

**(cis)-4-benzyl-7a-methyl-5-methylene-2,3,5,6,7,7a-hexahydro-1H-cyclopenta[c]pyridin-7-yl)methanol (9)**

A yellow oil, 56% yield, 15.1 mg.  $^1\text{H}$  NMR (400 MHz,  $\text{CDCl}_3$ )  $\delta$  7.32 – 7.21 (m, 3H), 7.18 (d,  $J$  = 7.2 Hz, 1H), 7.13 (d,  $J$  = 7.2 Hz, 2H), 5.07 (t,  $J$  = 2.4 Hz, 1H), 4.98 (d,  $J$  = 2.4 Hz, 1H), 3.87 (d,  $J$  = 15.4 Hz, 1H), 3.70 (d,  $J$  = 7.2 Hz, 2H), 3.40 – 3.01 (m, 4H), 2.58 (dd,  $J$  = 16.8, 8.4 Hz, 2H), 2.35 – 2.09 (m, 3H), 1.95 – 1.76 (m, 1H), 1.05 (s, 3H).  $^{13}\text{C}$  NMR (100 MHz,  $\text{CDCl}_3$ )  $\delta$  145.1, 142.0, 139.2, 128.6, 128.1, 128.1, 126.1, 109.0, 63.5, 48.6, 36.1, 33.6, 29.7, 18.1. IR (neat)  $\nu$  698, 1029, 1541, 2924  $\text{cm}^{-1}$ . HRMS (ESI) calcd. for  $\text{C}_{18}\text{H}_{24}\text{NO}_3$  ( $\text{M}+\text{H}$ ) $^+$ : 270.1852, Found: 270.1846.

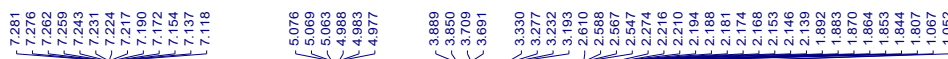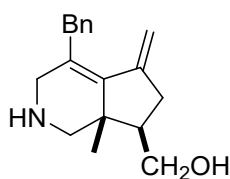

$^1\text{H}$  NMR ( $\text{CDCl}_3$ , 400 MHz, TMS)

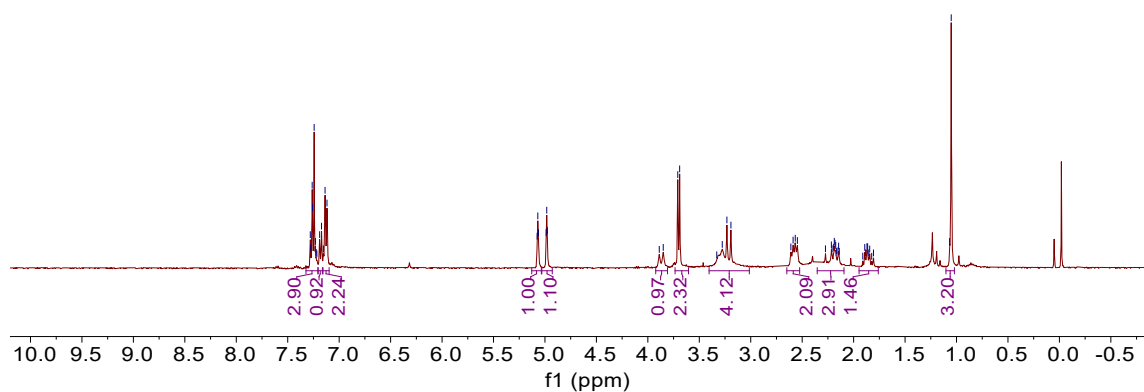

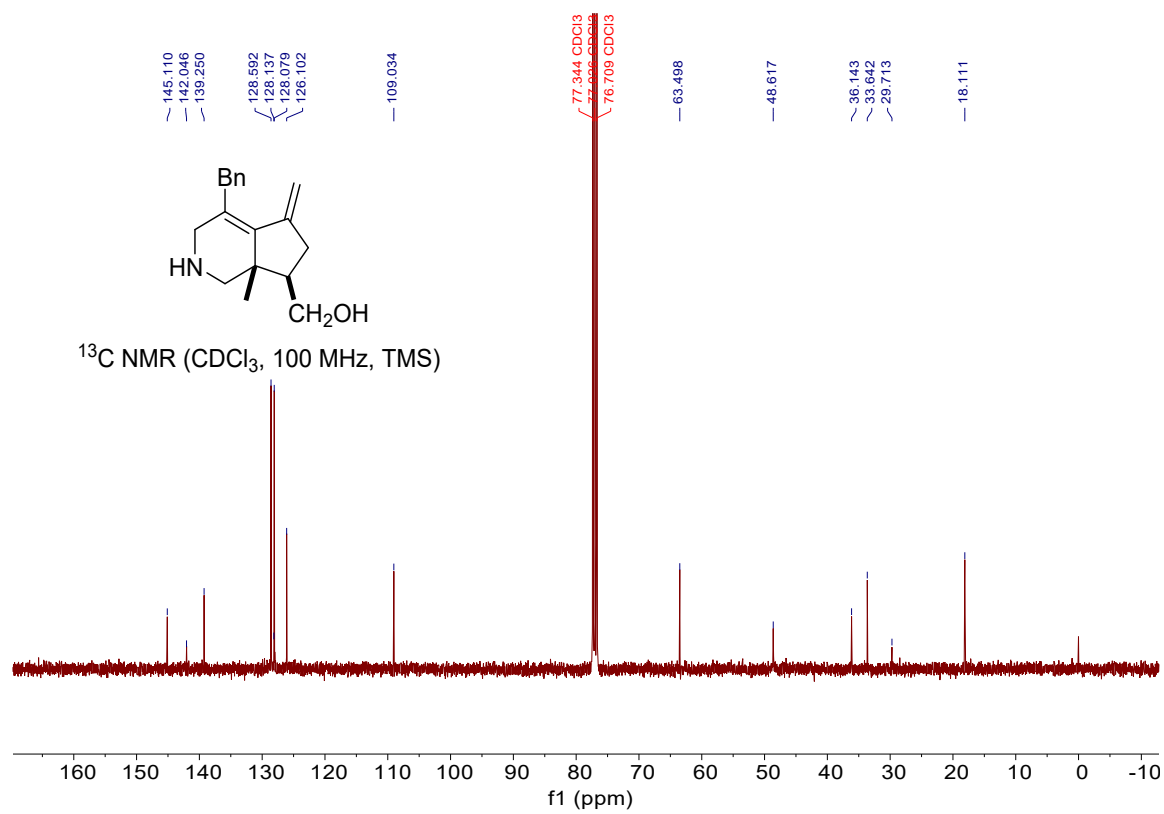

## 7. Computational studies

### 7.1 DFT calculations.

All quantum mechanical calculations have been performed with Gaussian 16.<sup>[4]</sup> The geometries of all species have been optimized at B3LYP/6-31G(d)/Lan12dz level. The subsequent frequency calculations on the stationary points were carried out at the same level of theory to ascertain the nature of the stationary points as minima on the respective potential energy surfaces. Thermochemical corrections to 298.15 K have been calculated for all minima from unscaled vibrational frequencies obtained at this same level. The thermochemical corrections have been combined with single-point energies calculated at the SMD(toluene)/M06/6-311+G(d,p)/Lan12dz//B3LYP/6-31G(d)/Lan12dz level to yield free energy  $G_{298}$  at 298.15 K. The solvent effect was estimated by the IEFPCM method with radii and nonelectrostatic terms for SMD solvation model in toluene ( $\epsilon = 2.3741$ ). All transition states were characterized by only one imaginary frequency pertaining to the desired reaction coordinate. The intrinsic reaction coordinate (IRC) calculations were carried out at the same level of theory to further authenticate the transition states.

**Table S2.** The total energies, enthalpies and free energies of all species in toluene shown in **Scheme 6**

|                  | $E_{\text{tot}}$ | $H_{298}$    | $G_{298}$    |
|------------------|------------------|--------------|--------------|
| <b>1a</b>        | -1530.400171     | -1529.9535   | -1530.046917 |
| <b>PdL</b>       | -1599.719147     | -1599.006049 | -1599.11262  |
| <b>1a+PdL</b>    | -3130.119318     | -3128.959549 | -3129.159537 |
| <b>2-Int1</b>    | -3130.137304     | -3128.975995 | -3129.160782 |
| <b>2-Ts1</b>     | -3130.127365     | -3128.968557 | -3129.150508 |
| <b>2-Int2</b>    | -3130.138826     | -3128.978398 | -3129.158371 |
| <b>2-Ts2</b>     | -3130.109595     | -3128.949922 | -3129.126309 |
| <b>2-Int3</b>    | -3130.129346     | -3128.968225 | -3129.144583 |
| <b>2-Ts3</b>     | -3130.109595     | -3128.950568 | -3129.119502 |
| <b>2-Int4</b>    | -3130.193322     | -3129.030167 | -3129.197772 |
| <b>2-Ts4</b>     | -3130.182306     | -3129.020747 | -3129.189121 |
| <b>2a</b>        | -1530.493307     | -1530.044027 | -1530.129621 |
| <b>2a+PdL</b>    | -3130.212454     | -3129.050076 | -3129.242241 |
| <b>3a-Me</b>     | -1530.398781     | -1529.952009 | -1530.044963 |
| <b>3a-Me+PdL</b> | -3130.117928     | -3128.958058 | -3129.157583 |
| <b>4-Int1</b>    | -3130.136862     | -3128.975368 | -3129.15988  |
| <b>4-Ts1</b>     | -3130.127724     | -3128.96881  | -3129.150866 |
| <b>4-Int2</b>    | -3130.132701     | -3128.972345 | -3129.152845 |
| <b>4-Ts2</b>     | -3130.095567     | -3128.935838 | -3129.110807 |

|               |              |              |              |
|---------------|--------------|--------------|--------------|
| <b>4-Int3</b> | -3130.132407 | -3128.971298 | -3129.147608 |
| <b>4-Ts3</b>  | -3130.105588 | -3128.946306 | -3129.116045 |
| <b>4-Int4</b> | -3130.193826 | -3129.031092 | -3129.199873 |
| <b>4-Ts4</b>  | -3130.180548 | -3129.019447 | -3129.190934 |
| <b>4a-Me</b>  | -1530.490918 | -1529.041624 | -1530.126867 |

## 6.2 Archive entries

|                                                            |             |             |             |                                                            |             |             |             |
|------------------------------------------------------------|-------------|-------------|-------------|------------------------------------------------------------|-------------|-------------|-------------|
|                                                            |             |             |             | H                                                          | 11.83897500 | -4.00771000 | -3.26462000 |
| <b>1a</b>                                                  |             |             |             | C                                                          | 6.23652900  | 3.30622300  | 0.21186500  |
| Zero-point correction= 0.417153 (Hartree/Particle)         |             |             |             | H                                                          | 6.24497200  | 2.98751000  | 1.26096000  |
| Thermal correction to Energy= 0.445727                     |             |             |             | H                                                          | 7.24896200  | 3.66942500  | -0.00478100 |
| Thermal correction to Enthalpy= 0.446671                   |             |             |             | H                                                          | 5.51370800  | 4.11128400  | 0.09235000  |
| Thermal correction to Gibbs Free Energy= 0.353255          |             |             |             | C                                                          | 6.08151300  | 0.70636600  | 3.36380900  |
| Sum of electronic and zero-point Energies= -1530.433234    |             |             |             | H                                                          | 6.57411900  | -0.05616100 | 3.98176000  |
| Sum of electronic and thermal Energies= -1530.404660       |             |             |             | H                                                          | 6.84001400  | 1.46734200  | 3.14856200  |
| Sum of electronic and thermal Enthalpies= -1530.403716     |             |             |             | H                                                          | 5.27626100  | 1.16062400  | 3.94670300  |
| Sum of electronic and thermal Free Energies= -1530.497133  |             |             |             | C                                                          | 4.78472800  | 1.96787400  | -1.38886400 |
| HF(B3LYP/6-311+G(d,p)/Lanl2dz, SMD[toluene])= -1530.862952 |             |             |             | C                                                          | 3.64507300  | 2.90487500  | -1.46757300 |
| N                                                          | 7.44804800  | 0.53864500  | 0.50003000  | O                                                          | 3.53723200  | 4.00763300  | -0.96342600 |
| C                                                          | 6.99852100  | 1.07898000  | -0.79294100 | O                                                          | 2.65579100  | 2.35230700  | -2.22468600 |
| H                                                          | 7.86352800  | 1.55858400  | -1.26140000 | C                                                          | 1.48860300  | 3.16895500  | -2.39575500 |
| H                                                          | 6.66377500  | 0.26124700  | -1.44713500 | H                                                          | 0.81102700  | 2.58452600  | -3.01874100 |
| C                                                          | 5.91132900  | 2.13329500  | -0.66789100 | H                                                          | 1.02490800  | 3.38762100  | -1.42991700 |
| C                                                          | 6.58820100  | -0.48920800 | 1.12760700  | H                                                          | 1.74764300  | 4.11198600  | -2.88534200 |
| H                                                          | 7.23197400  | -1.17262100 | 1.68929400  | H                                                          | 4.65767400  | 1.06320700  | -1.97723800 |
| H                                                          | 6.08939900  | -1.06505900 | 0.33907600  |                                                            |             |             |             |
| C                                                          | 5.55741000  | 0.09622800  | 2.08234300  | <b>PdL</b>                                                 |             |             |             |
| C                                                          | 4.27630400  | 0.02251900  | 1.79333600  | Zero-point correction= 0.675005 (Hartree/Particle)         |             |             |             |
| C                                                          | 3.02191400  | -0.04600800 | 1.49444100  | Thermal correction to Energy= 0.712154                     |             |             |             |
| C                                                          | 1.86607000  | 0.60532800  | 0.84711400  | Thermal correction to Enthalpy= 0.713098                   |             |             |             |
| C                                                          | 1.76149300  | -0.80766800 | 1.55317400  | Thermal correction to Gibbs Free Energy= 0.606527          |             |             |             |
| H                                                          | 1.86435700  | 0.65777200  | -0.24099800 | Sum of electronic and zero-point Energies= -1599.609148    |             |             |             |
| H                                                          | 1.43290300  | 1.46749700  | 1.35229800  | Sum of electronic and thermal Energies= -1599.572000       |             |             |             |
| H                                                          | 1.24984500  | -0.86891200 | 2.51228900  | Sum of electronic and thermal Enthalpies= -1599.571056     |             |             |             |
| H                                                          | 1.67885400  | -1.69780300 | 0.93062100  | Sum of electronic and thermal Free Energies= -1599.677627  |             |             |             |
| S                                                          | 9.11445300  | 0.44824600  | 0.77306600  | HF(B3LYP/6-311+G(d,p)/Lanl2dz, SMD[toluene])= -1600.040533 |             |             |             |
| O                                                          | 9.68668500  | 1.66799100  | 0.19534500  | Pd                                                         | -4.27170700 | -0.14773300 | 0.00313200  |
| O                                                          | 9.27210400  | 0.10876800  | 2.18960400  | P                                                          | -2.01657000 | -0.23326900 | -0.39739100 |
| C                                                          | 9.73714800  | -0.94191100 | -0.18047000 | C                                                          | -1.66186200 | 0.78965400  | -1.99273200 |
| C                                                          | 9.82179300  | -2.20464200 | 0.41171800  | C                                                          | -1.52478000 | -2.08669500 | -0.59915000 |
| C                                                          | 10.11828200 | -0.75303500 | -1.51211700 | C                                                          | -1.65197000 | -2.70119000 | 0.81129100  |
| C                                                          | 10.27231800 | -3.28428000 | -0.34635100 | H                                                          | -0.92868300 | -2.28571200 | 1.51644300  |
| H                                                          | 9.56921900  | -2.32825500 | 1.45928700  | H                                                          | -2.65525500 | -2.53514800 | 1.21929600  |
| C                                                          | 10.56589400 | -1.84400200 | -2.25415000 | H                                                          | -1.48168500 | -3.78420500 | 0.75131600  |
| H                                                          | 10.09512300 | 0.24022400  | -1.94753700 | C                                                          | -2.58704300 | -2.76647100 | -1.49155800 |
| C                                                          | 10.64240200 | -3.12586900 | -1.68938300 | H                                                          | -2.41992600 | -3.85222000 | -1.47509500 |
| H                                                          | 10.34848000 | -4.26471800 | 0.11736500  | H                                                          | -3.60163000 | -2.56256600 | -1.13066800 |
| H                                                          | 10.87280700 | -1.69518500 | -3.28655900 | H                                                          | -2.52375200 | -2.44310800 | -2.53458900 |
| C                                                          | 11.10261000 | -4.30633700 | -2.51122600 | C                                                          | -0.13883200 | -2.38593400 | -1.19432900 |
| H                                                          | 11.55277500 | -5.08151900 | -1.88282800 | H                                                          | 0.07239000  | -3.45886400 | -1.08755900 |
| H                                                          | 10.25989400 | -4.76644600 | -3.04436500 | H                                                          | -0.10274500 | -2.16373700 | -2.26353900 |

|   |             |             |             |                                                        |              |                    |             |
|---|-------------|-------------|-------------|--------------------------------------------------------|--------------|--------------------|-------------|
| H | 0.66685800  | -1.83440600 | -0.70916600 | H                                                      | 3.78047900   | -1.60804300        | 3.08365100  |
| C | -2.74608600 | 0.43750300  | -3.03551300 | H                                                      | 2.57380200   | -0.42550100        | 3.61313500  |
| H | -2.66126100 | 1.13260700  | -3.88211500 | C                                                      | 2.03053700   | -3.24762400        | 1.65050500  |
| H | -2.62974100 | -0.57505000 | -3.43257800 | H                                                      | 3.08148600   | -3.54248500        | 1.54898600  |
| H | -3.75225900 | 0.52443500  | -2.60983000 | H                                                      | 1.60508300   | -3.85537100        | 2.45757600  |
| C | -0.28538100 | 0.60320800  | -2.65218600 | H                                                      | 1.51654600   | -3.51032000        | 0.72313300  |
| H | -0.20398000 | -0.36829100 | -3.14557400 | C                                                      | 1.69650200   | 2.84849000         | -0.26389100 |
| H | -0.15553000 | 1.36569500  | -3.43248900 | H                                                      | 0.65431100   | 2.85953600         | 0.06714800  |
| H | 0.54404900  | 0.69446300  | -1.95024000 | C                                                      | 1.75528100   | 3.49553400         | -1.66036500 |
| C | -1.87474000 | 2.26532500  | -1.59288400 | H                                                      | 1.26627800   | 4.47626300         | -1.63256400 |
| H | -2.87315400 | 2.41353600  | -1.16645600 | H                                                      | 2.78802400   | 3.66266600         | -1.98765300 |
| H | -1.14133200 | 2.61155200  | -0.86131500 | H                                                      | 1.25557200   | 2.89058800         | -2.42027500 |
| H | -1.78654400 | 2.89855000  | -2.48551100 | C                                                      | 2.49684200   | 3.72502500         | 0.72641800  |
| C | -1.04206500 | 0.53342600  | 1.08290700  | H                                                      | 3.55999300   | 3.73952800         | 0.45796300  |
| C | 0.33836800  | 0.75253400  | 1.40915400  | H                                                      | 2.12832900   | 4.75795300         | 0.70521300  |
| C | -1.98834100 | 0.96362900  | 2.04271800  | H                                                      | 2.41460200   | 3.35968900         | 1.75375000  |
| C | 0.64118100  | 1.36957500  | 2.64145100  |                                                        |              |                    |             |
| C | -1.65823500 | 1.57086800  | 3.25134700  | <b>2-Int1</b>                                          |              |                    |             |
| H | -3.04091100 | 0.80501900  | 1.81224300  | Zero-point correction=                                 | 1.108267     | (Hartree/Particle) |             |
| C | -0.32072900 | 1.77871300  | 3.55903900  | Thermal correction to Energy=                          | 1.173164     |                    |             |
| H | 1.68857700  | 1.52909100  | 2.87691700  | Thermal correction to Enthalpy=                        | 1.174109     |                    |             |
| H | -2.44655700 | 1.87286500  | 3.93565600  | Thermal correction to Gibbs Free Energy=               | 1.006260     |                    |             |
| H | -0.02067300 | 2.24890100  | 4.49193400  | Sum of electronic and zero-point Energies=             | -3129.392785 |                    |             |
| C | 1.58996000  | 0.41860200  | 0.62042700  | Sum of electronic and thermal Energies=                | -3129.327887 |                    |             |
| C | 2.29288800  | -0.79187200 | 0.87426500  | Sum of electronic and thermal Enthalpies=              | -3129.326943 |                    |             |
| C | 2.19913500  | 1.40183400  | -0.20352100 | Sum of electronic and thermal Free Energies=           | -3129.494791 |                    |             |
| C | 3.47230600  | -1.05705400 | 0.16860900  | HF(B3LYP/6-311+G(d,p)/LanL2dz, SMD[ <i>toluene</i> ])= | -3129.160782 |                    |             |
| C | 3.38123100  | 1.08106100  | -0.88514200 | N                                                      | 7.48520821   | -11.22022479       | -1.67957616 |
| C | 4.01926200  | -0.15070700 | -0.74315100 | C                                                      | 6.54741821   | -10.81542050       | -2.72599123 |
| H | 3.98994400  | -1.99396600 | 0.35325600  | H                                                      | 6.74046524   | -11.44333173       | -3.60085518 |
| H | 3.83259600  | 1.82573500  | -1.53556600 | H                                                      | 5.51151938   | -10.98685149       | -2.39850261 |
| C | 5.28915400  | -0.46725900 | -1.52208700 | C                                                      | 6.74957413   | -9.37392667        | -3.13935640 |
| H | 5.51354900  | 0.41151900  | -2.14223400 | C                                                      | 7.23275279   | -10.68471146       | -0.33261880 |
| C | 5.09038800  | -1.66372600 | -2.47225800 | H                                                      | 7.53904729   | -11.43493351       | 0.40245770  |
| H | 4.87295700  | -2.58211400 | -1.91390800 | H                                                      | 6.15703926   | -10.51100294       | -0.21335575 |
| H | 4.25736700  | -1.48768300 | -3.16163300 | C                                                      | 8.00816546   | -9.40605540        | -0.08764876 |
| H | 5.99491100  | -1.84063100 | -3.06664500 | C                                                      | 7.36799565   | -8.27137563        | 0.06182212  |
| C | 6.49683200  | -0.69473500 | -0.59283400 | C                                                      | 6.71003346   | -7.16822874        | 0.17318464  |
| H | 7.40902300  | -0.85999400 | -1.17869400 | C                                                      | 6.12816615   | -6.01706379        | -0.54575799 |
| H | 6.66233100  | 0.16891800  | 0.06061100  | C                                                      | 6.09040718   | -6.13395521        | 1.00579184  |
| H | 6.34934400  | -1.57367900 | 0.04596500  | H                                                      | 5.19884923   | -6.21551699        | -1.07873946 |
| C | 1.88715100  | -1.75373200 | 1.99686600  | H                                                      | 6.83032691   | -5.33416061        | -1.03018758 |
| H | 0.83795900  | -1.56598700 | 2.24139600  | H                                                      | 6.75770777   | -5.49280388        | 1.57433871  |
| C | 2.71078000  | -1.45476300 | 3.27025800  | H                                                      | 5.12926914   | -6.33742604        | 1.47132530  |
| H | 2.40995000  | -2.12455100 | 4.08516200  | S                                                      | 8.15824170   | -12.74108944       | -1.79849026 |

|    |            |              |             |   |             |             |             |
|----|------------|--------------|-------------|---|-------------|-------------|-------------|
| O  | 8.47128447 | -12.94494044 | -3.20366534 | H | 1.22439533  | -0.66038951 | 0.51050985  |
| O  | 9.17658224 | -12.82265968 | -0.76479025 | H | 1.45504185  | -0.38299873 | 2.23424054  |
| C  | 6.85108791 | -13.86955999 | -1.36050862 | H | 2.34346384  | 0.59754893  | 1.07504140  |
| C  | 6.71608839 | -14.28736284 | -0.03933089 | C | 4.00465431  | -1.11397423 | 2.53115508  |
| C  | 5.94050830 | -14.27573900 | -2.33380466 | H | 4.79812263  | -1.85628916 | 2.64318537  |
| C  | 5.64929926 | -15.10881051 | 0.30672356  | H | 4.46576110  | -0.12708907 | 2.42814243  |
| H  | 7.45525467 | -13.99334028 | 0.69828807  | H | 3.41294095  | -1.11703068 | 3.45559243  |
| C  | 4.87998271 | -15.09594820 | -1.96996687 | C | 5.45641500  | -0.34579000 | -0.12290200 |
| H  | 6.07995327 | -13.97482925 | -3.36686830 | C | 5.07777400  | 1.01834600  | -0.11038500 |
| C  | 4.71365037 | -15.51813943 | -0.64714725 | C | 6.82805700  | -0.64509100 | -0.12065300 |
| H  | 5.54747369 | -15.44478790 | 1.33516357  | C | 6.08489900  | 1.99540200  | -0.08558700 |
| H  | 4.17401049 | -15.42274304 | -2.72881477 | C | 7.81070600  | 0.33545400  | -0.09542600 |
| C  | 3.54241396 | -16.38335350 | -0.25809178 | H | 7.14256000  | -1.68067300 | -0.14971000 |
| H  | 3.77264592 | -16.99722268 | 0.61763113  | C | 7.43430400  | 1.67261200  | -0.07461500 |
| H  | 2.67153509 | -15.76514636 | -0.00905670 | H | 5.78301500  | 3.03908900  | -0.08529400 |
| H  | 3.24999563 | -17.04977646 | -1.07513318 | H | 8.85941900  | 0.05353100  | -0.09687500 |
| C  | 8.13877994 | -9.02253601  | -3.57870920 | H | 8.18238800  | 2.45964600  | -0.05760100 |
| H  | 8.73717999 | -8.75933588  | -2.70076137 | C | 3.67831500  | 1.57890100  | -0.15304700 |
| H  | 8.61781620 | -9.88857405  | -4.04717315 | C | 3.09663900  | 1.91081100  | -1.39517500 |
| H  | 8.14842841 | -8.16540811  | -4.25123631 | C | 3.03187600  | 1.96463200  | 1.03561800  |
| C  | 9.50969903 | -9.53144323  | -0.04402298 | C | 1.86610200  | 2.56465100  | -1.41401100 |
| H  | 9.81080365 | -10.23070819 | 0.74493971  | C | 1.79789900  | 2.61311900  | 0.96580000  |
| H  | 9.88837302 | -9.94377306  | -0.98614645 | C | 1.18577700  | 2.90910700  | -0.24707300 |
| H  | 9.98508935 | -8.56551043  | 0.14090156  | H | 1.41386800  | 2.81765200  | -2.37165900 |
| Pd | 5.18614102 | -3.76355308  | -0.19819657 | H | 1.29748500  | 2.87520300  | 1.89181000  |
| P  | 4.21026600 | -1.72671100  | -0.19430300 | C | -0.16275200 | 3.60441900  | -0.33657500 |
| C  | 3.09225142 | -1.46223978  | 1.34599355  | H | -0.70505000 | 3.13201400  | -1.16754500 |
| C  | 3.19490034 | -1.34755778  | -1.77001164 | C | -1.01918200 | 3.43972500  | 0.92025500  |
| C  | 4.13813159 | -1.59844639  | -2.95559836 | H | -1.11897700 | 2.38918700  | 1.21201400  |
| H  | 4.89632095 | -0.81321669  | -3.02808854 | H | -0.59517100 | 3.98732100  | 1.77026400  |
| H  | 4.65193462 | -2.55778422  | -2.86701455 | H | -2.02174600 | 3.84579200  | 0.74722500  |
| H  | 3.56399795 | -1.59177735  | -3.89146403 | C | 0.02076000  | 5.09040500  | -0.67941700 |
| C  | 2.05493947 | -2.37797013  | -1.83139952 | H | 0.59031400  | 5.21902200  | -1.60597100 |
| H  | 1.57670545 | -2.33535854  | -2.81874018 | H | -0.95042800 | 5.58406900  | -0.80201500 |
| H  | 2.43379707 | -3.39397268  | -1.67227011 | H | 0.56486700  | 5.60238700  | 0.12306100  |
| H  | 1.27835661 | -2.18091075  | -1.08558727 | C | 3.65368800  | 1.72758500  | 2.40095100  |
| C  | 2.62045929 | 0.06481264   | -1.96177844 | H | 4.41975600  | 0.95778600  | 2.28376700  |
| H  | 2.05679725 | 0.08473159   | -2.90388040 | C | 4.35550900  | 2.99623300  | 2.90823600  |
| H  | 1.93614230 | 0.37277390   | -1.17015045 | H | 3.64146400  | 3.82413000  | 2.99133900  |
| H  | 3.41357624 | 0.81267573   | -2.04777942 | H | 4.79324000  | 2.82372600  | 3.89844100  |
| C  | 2.43675145 | -2.82361918  | 1.65174410  | H | 5.15781800  | 3.30666000  | 2.23175500  |
| H  | 1.83093752 | -2.73761775  | 2.56390744  | C | 2.63632900  | 1.23195000  | 3.43806800  |
| H  | 1.78173729 | -3.16145392  | 0.84350361  | H | 1.96453900  | 0.47885000  | 3.01727400  |
| H  | 3.19749652 | -3.59613262  | 1.80307831  | H | 3.15609300  | 0.79792000  | 4.29973600  |
| C  | 1.97386978 | -0.41313436  | 1.26719445  | H | 2.01046000  | 2.04961600  | 3.81300700  |



|                                                            |             |             |             |    |              |             |             |
|------------------------------------------------------------|-------------|-------------|-------------|----|--------------|-------------|-------------|
| C                                                          | 3.80909300  | 1.63308600  | -2.70976200 | H  | -1.29145000  | -1.73274500 | -2.44315200 |
| H                                                          | 4.64027900  | 0.95364400  | -2.50363700 | H  | -1.71985500  | -2.23363500 | -0.71732000 |
| C                                                          | 2.90722600  | 0.94916000  | -3.74301100 | S  | -8.84298600  | 0.46375500  | -0.74233700 |
| H                                                          | 2.09553600  | 1.60587500  | -4.07736900 | O  | -9.35910200  | 1.79579300  | -0.41214300 |
| H                                                          | 3.48827500  | 0.67140000  | -4.62990900 | O  | -9.05079000  | -0.14772400 | -2.05741600 |
| H                                                          | 2.46179100  | 0.03961500  | -3.32420200 | C  | -9.48724300  | -0.68047300 | 0.48485300  |
| C                                                          | 4.40882500  | 2.92815600  | -3.27541100 | C  | -9.62737600  | -2.03311200 | 0.16371600  |
| H                                                          | 4.94926500  | 2.72983200  | -4.20821700 | C  | -9.82943500  | -0.21166000 | 1.75653300  |
| H                                                          | 3.62302300  | 3.66322600  | -3.48623100 | C  | -10.09414400 | -2.91923000 | 1.13329500  |
| H                                                          | 5.10929400  | 3.37885700  | -2.56462100 | H  | -9.40447900  | -2.37591000 | -0.84090900 |
| C                                                          | 5.69132373  | -8.55046832 | -3.11179336 | C  | -10.29404000 | -1.11223700 | 2.71280900  |
| C                                                          | 5.69918923  | -7.12272399 | -3.48325745 | H  | -9.76322500  | 0.84774000  | 1.98009700  |
| O                                                          | 6.65955320  | -6.43199191 | -3.75749116 | C  | -10.42595800 | -2.47821500 | 2.42221400  |
| O                                                          | 4.43986388  | -6.64010526 | -3.44737712 | H  | -10.21340800 | -3.96988300 | 0.88024600  |
| C                                                          | 4.30514643  | -5.24008587 | -3.68085743 | H  | -10.57059500 | -0.74594700 | 3.69849500  |
| H                                                          | 3.23367947  | -5.05050143 | -3.74473600 | C  | -10.90384500 | -3.45006000 | 3.47480000  |
| H                                                          | 4.72852462  | -4.67968605 | -2.83911678 | H  | -10.06223400 | -3.83237200 | 4.06781400  |
| H                                                          | 4.80753827  | -4.94657791 | -4.60565480 | H  | -11.60254600 | -2.97520100 | 4.17143400  |
| H                                                          | 4.72845897  | -8.92281220 | -2.77368784 | H  | -11.40440100 | -4.31384100 | 3.02549800  |
| <b>2-Ts1</b>                                               |             |             |             | C  | -5.88117800  | 3.26385400  | -0.84312400 |
| Zero-point correction= 1.090660 (Hartree/Particle)         |             |             |             | H  | -5.85016400  | 2.74183300  | -1.80703800 |
| Thermal correction to Energy= 1.157864                     |             |             |             | H  | -6.90484200  | 3.64153300  | -0.73179800 |
| Thermal correction to Enthalpy= 1.158808                   |             |             |             | H  | -5.17174100  | 4.08916600  | -0.87102600 |
| Thermal correction to Gibbs Free Energy= 0.976857          |             |             |             | C  | -5.85498100  | 0.10629800  | -3.37583900 |
| Sum of electronic and zero-point Energies= -3130.027104    |             |             |             | H  | -6.40126300  | -0.73153900 | -3.82932100 |
| Sum of electronic and thermal Energies= -3129.959901       |             |             |             | H  | -6.56911400  | 0.93361100  | -3.29620700 |
| Sum of electronic and thermal Enthalpies= -3129.958956     |             |             |             | H  | -5.04444200  | 0.39864300  | -4.04830900 |
| Sum of electronic and thermal Free Energies= -3130.140907  |             |             |             | Pd | 0.30161900   | -0.70584200 | -0.75229300 |
| HF(B3LYP/6-311+G(d,p)/LanL2dz, SMD[toluene])= -3129.150508 |             |             |             | P  | 2.62118500   | -0.91182000 | -0.15158700 |
| Imaginary frequency is-209.52cm <sup>-1</sup>              |             |             |             | C  | 3.22453400   | -2.66942900 | -0.65952700 |
| N                                                          | -7.16850000 | 0.54348100  | -0.52501200 | C  | 2.74548600   | -0.63519200 | 1.74902800  |
| C                                                          | -6.66768000 | 1.31743900  | 0.62180900  | C  | 2.28443800   | 0.82394700  | 1.96083700  |
| H                                                          | -7.50682900 | 1.90424500  | 1.00827700  | H  | 2.95142700   | 1.54552500  | 1.48254300  |
| H                                                          | -6.33065000 | 0.63706000  | 1.41680000  | H  | 1.27748000   | 0.97447300  | 1.55631200  |
| C                                                          | -5.56368300 | 2.29742100  | 0.26191200  | H  | 2.26150700   | 1.04576900  | 3.03612500  |
| C                                                          | -6.36010600 | -0.62182500 | -0.94826900 | C  | 1.69789000   | -1.55150200 | 2.42118700  |
| H                                                          | -7.04138600 | -1.37385800 | -1.35739800 | H  | 1.58221700   | -1.24455100 | 3.46954800  |
| H                                                          | -5.86848200 | -1.05257300 | -0.06783600 | H  | 0.72110800   | -1.47846400 | 1.92961600  |
| C                                                          | -5.32543100 | -0.27963900 | -2.01139800 | H  | 2.00897200   | -2.60066000 | 2.42446000  |
| C                                                          | -4.04283000 | -0.37163000 | -1.73668400 | C  | 4.09784700   | -0.87095700 | 2.44032800  |
| C                                                          | -2.77978100 | -0.46597300 | -1.45572700 | H  | 4.02022200   | -0.55630600 | 3.49063600  |
| C                                                          | -1.65241600 | 0.33918600  | -0.95098600 | H  | 4.37547200   | -1.92716400 | 2.44515000  |
| C                                                          | -1.67060900 | -1.43810800 | -1.46295800 | H  | 4.91356300   | -0.31263200 | 1.98452200  |
| H                                                          | -1.68853600 | 0.62252300  | 0.10170600  | C  | 2.09861200   | -3.68204600 | -0.35157800 |
| H                                                          | -1.26507400 | 1.10015100  | -1.63026200 | H  | 2.39199200   | -4.66644000 | -0.74175500 |



|    |             |              |             |   |             |             |             |
|----|-------------|--------------|-------------|---|-------------|-------------|-------------|
| C  | -3.25276853 | -5.57132457  | -0.88350530 | H | -2.13810883 | -1.04923634 | 2.36694160  |
| H  | -5.60909720 | -6.51052419  | 0.16944600  | C | -1.62970335 | -2.16369254 | -2.29417082 |
| H  | -6.36422709 | -6.23015102  | -1.45519207 | H | -1.10371315 | -1.65666945 | -3.11315546 |
| H  | -2.41918340 | -5.24101951  | -1.50548375 | H | -0.87506182 | -2.54233669 | -1.60010994 |
| H  | -2.92548248 | -5.83340832  | 0.12961186  | H | -2.16506141 | -3.02208367 | -2.71032233 |
| S  | -3.77398822 | -11.70664468 | -4.86296760 | C | -1.83173060 | 0.07333709  | -1.18454286 |
| O  | -4.93930713 | -12.54515227 | -5.09859779 | H | -1.03690251 | -0.15336736 | -0.47075246 |
| O  | -3.19902333 | -10.88316676 | -5.91311118 | H | -1.35446680 | 0.52195879  | -2.06509550 |
| C  | -2.47479305 | -12.75081510 | -4.22938970 | H | -2.48222687 | 0.83808257  | -0.75052722 |
| C  | -1.14431085 | -12.39103723 | -4.42579854 | C | -3.60787193 | -0.74111198 | -2.71586170 |
| C  | -2.80389609 | -13.88635583 | -3.49209770 | H | -4.11384196 | -1.60499829 | -3.14860466 |
| C  | -0.13971987 | -13.17202803 | -3.86580890 | H | -4.36056931 | -0.04171199 | -2.33956603 |
| H  | -0.90497506 | -11.52480230 | -5.03346471 | H | -3.06017911 | -0.24390513 | -3.52613810 |
| C  | -1.78749443 | -14.65497810 | -2.93856535 | C | -5.11247900 | -1.19105100 | 0.00847000  |
| H  | -3.84340998 | -14.17615050 | -3.37917785 | C | -5.02561300 | 0.18556700  | 0.30276700  |
| C  | -0.44398765 | -14.30719819 | -3.10986435 | C | -6.37612600 | -1.80071000 | 0.01005500  |
| H  | 0.89979819  | -12.89851707 | -4.02623389 | C | -6.20838800 | 0.88899700  | 0.57698100  |
| H  | -2.04147459 | -15.54662847 | -2.37134222 | C | -7.53605700 | -1.08836200 | 0.28202500  |
| C  | 0.64988877  | -15.13076780 | -2.47941883 | H | -6.45680100 | -2.86046200 | -0.19983200 |
| H  | 1.00442666  | -15.91132023 | -3.15914984 | C | -7.45054300 | 0.27032600  | 0.56677500  |
| H  | 1.50974820  | -14.50019717 | -2.22295919 | H | -6.13506900 | 1.94736300  | 0.81181500  |
| H  | 0.30719654  | -15.61061342 | -1.55763835 | H | -8.49750000 | -1.59275400 | 0.27610800  |
| C  | -6.88856470 | -9.74686908  | -2.77197387 | H | -8.34507800 | 0.84532500  | 0.78652600  |
| H  | -6.68135245 | -8.68635130  | -2.95227487 | C | -3.77138000 | 1.02991300  | 0.39200700  |
| H  | -6.86407096 | -10.26184217 | -3.73607895 | C | -3.22245600 | 1.31156500  | 1.67347100  |
| H  | -7.88503330 | -9.81445464  | -2.33145971 | C | -3.41767900 | 1.87712600  | -0.68838500 |
| C  | -4.01353465 | -7.82147938  | -4.90573941 | C | -2.39538000 | 2.41554500  | 1.83687400  |
| H  | -3.09786709 | -7.88856791  | -5.50641951 | C | -2.56698600 | 2.96560300  | -0.46945500 |
| H  | -4.73795204 | -8.50258960  | -5.36769331 | C | -2.06747800 | 3.27645800  | 0.78966900  |
| H  | -4.40156547 | -6.80105390  | -4.96108228 | H | -2.02074600 | 2.63900100  | 2.83260600  |
| Pd | -4.76519995 | -4.17996322  | -0.66024055 | H | -2.33160600 | 3.61003600  | -1.31014300 |
| P  | -3.55607900 | -2.13574300  | -0.28315200 | C | -1.23889300 | 4.51823500  | 1.08740500  |
| C  | -2.60770886 | -1.17341698  | -1.63418762 | H | -1.79669600 | 5.07182100  | 1.85768200  |
| C  | -2.03059264 | -2.55082319  | 0.78089956  | C | 0.13144200  | 4.15261600  | 1.67947000  |
| C  | -2.46891326 | -3.64478462  | 1.76660495  | H | 0.04268500  | 3.49727400  | 2.55202100  |
| H  | -3.20862580 | -3.26790288  | 2.47798458  | H | 0.74266200  | 3.65219700  | 0.92501400  |
| H  | -2.89498008 | -4.50740411  | 1.24667277  | H | 0.66030200  | 5.05975700  | 1.99336600  |
| H  | -1.59821603 | -3.98111851  | 2.34394644  | C | -1.05734400 | 5.44722600  | -0.11416100 |
| C  | -0.94843953 | -3.15613315  | -0.12985185 | H | -2.01802100 | 5.75509600  | -0.54253400 |
| H  | -0.15535091 | -3.58170170  | 0.49762703  | H | -0.52476400 | 6.35213000  | 0.19635300  |
| H  | -1.34939095 | -3.96165911  | -0.75188013 | H | -0.45324000 | 4.96366900  | -0.88935000 |
| H  | -0.48029837 | -2.41426287  | -0.78187661 | C | -4.05716600 | 1.71981200  | -2.05784700 |
| C  | -1.43218160 | -1.40560248  | 1.61121057  | H | -4.56651800 | 0.75364700  | -2.07222100 |
| H  | -0.54990512 | -1.78432219  | 2.14310359  | C | -5.12539100 | 2.79835200  | -2.28960300 |
| H  | -1.10762595 | -0.55390891  | 1.01030491  | H | -4.68364800 | 3.80066500  | -2.24793900 |

|                                                            |             |              |             |    |             |             |             |
|------------------------------------------------------------|-------------|--------------|-------------|----|-------------|-------------|-------------|
| H                                                          | -5.58889600 | 2.67193200   | -3.27469400 | C  | 3.60373300  | -0.08868600 | 1.39442200  |
| H                                                          | -5.91472200 | 2.74402900   | -1.53339200 | C  | 2.43015000  | -0.27112600 | 0.79239500  |
| C                                                          | -3.02581500 | 1.72797800   | -3.19178900 | C  | 1.98061700  | -0.97463700 | -0.36433800 |
| H                                                          | -2.18460600 | 1.06599500   | -2.96453800 | C  | 1.62960100  | -2.34121300 | -0.42837500 |
| H                                                          | -3.48861900 | 1.39746600   | -4.12843800 | C  | 1.29957200  | -0.15207100 | -1.36818300 |
| H                                                          | -2.62882600 | 2.73552900   | -3.36130800 | S  | 7.52997400  | -0.10708200 | 1.17762800  |
| C                                                          | -3.59667800 | 0.50179100   | 2.90150400  | O  | 8.34699000  | 1.09633600  | 0.97636200  |
| H                                                          | -4.20696900 | -0.34060600  | 2.57041300  | O  | 7.35513300  | -0.70483800 | 2.50354700  |
| C                                                          | -2.35054700 | -0.05765000  | 3.60001900  | C  | 8.19799600  | -1.38194400 | 0.09875600  |
| H                                                          | -1.73681000 | 0.74331900   | 4.02670100  | C  | 7.89869700  | -2.72527300 | 0.34616900  |
| H                                                          | -2.63661700 | -0.72696600  | 4.41971100  | C  | 8.98496800  | -1.02001200 | -0.99692400 |
| H                                                          | -1.72295000 | -0.61169700  | 2.89208400  | C  | 8.38041900  | -3.70241400 | -0.52176900 |
| C                                                          | -4.46007500 | 1.32298900   | 3.86846800  | H  | 7.31521900  | -2.99873500 | 1.21864100  |
| H                                                          | -4.75198600 | 0.71316300   | 4.73083600  | C  | 9.46005000  | -2.01199000 | -1.85429700 |
| H                                                          | -3.91714300 | 2.19831600   | 4.24259200  | H  | 9.23940700  | 0.02213900  | -1.15729900 |
| H                                                          | -5.37261200 | 1.67586600   | 3.37624700  | C  | 9.16536400  | -3.36433900 | -1.63454700 |
| C                                                          | -5.71243542 | -10.02566660 | -0.54512291 | H  | 8.14855600  | -4.74709500 | -0.32820700 |
| C                                                          | -6.62616172 | -9.16070609  | 0.21670397  | H  | 10.07613300 | -1.73028000 | -2.70487500 |
| O                                                          | -7.70915719 | -8.74560377  | -0.14463208 | C  | 9.70679900  | -4.43675400 | -2.55022600 |
| O                                                          | -6.12040688 | -8.88380317  | 1.43461900  | H  | 9.96548600  | -4.03155300 | -3.53369800 |
| C                                                          | -6.92916007 | -8.03210579  | 2.23830313  | H  | 10.61581800 | -4.88950100 | -2.13239800 |
| H                                                          | -6.35095470 | -7.83949100  | 3.14216842  | H  | 8.98070100  | -5.24417700 | -2.69471000 |
| H                                                          | -7.13606226 | -7.09568591  | 1.71306511  | C  | 5.57066300  | 3.32249800  | 0.46249000  |
| H                                                          | -7.87714510 | -8.51868396  | 2.48599295  | H  | 6.26486700  | 2.86121100  | 1.16820000  |
| H                                                          | -4.87932923 | -10.43331409 | 0.01958926  | H  | 6.10673000  | 4.12328000  | -0.06368400 |
|                                                            |             |              |             | H  | 4.75271500  | 3.79538700  | 1.00900000  |
| <b>2-Ts2</b>                                               |             |              |             | C  | 3.75583700  | 0.66240300  | 2.70058100  |
| Zero-point correction= 1.092387 (Hartree/Particle)         |             |              |             | H  | 4.19196600  | 0.02033200  | 3.47982300  |
| Thermal correction to Energy= 1.158729                     |             |              |             | H  | 4.43114200  | 1.52215700  | 2.60181000  |
| Thermal correction to Enthalpy= 1.159673                   |             |              |             | H  | 2.78195000  | 1.02031400  | 3.04515400  |
| Thermal correction to Gibbs Free Energy= 0.983287          |             |              |             | Pd | -0.12287800 | -0.46723000 | 0.11153500  |
| Sum of electronic and zero-point Energies= -3129.991967    |             |              |             | P  | -2.12263000 | 0.73778700  | -0.15688600 |
| Sum of electronic and thermal Energies= -3129.925625       |             |              |             | C  | -2.90966800 | 0.59594900  | -1.91116600 |
| Sum of electronic and thermal Enthalpies= -3129.924681     |             |              |             | C  | -2.03689100 | 2.60837600  | 0.40121000  |
| Sum of electronic and thermal Free Energies= -3130.101068  |             |              |             | C  | -1.01331000 | 2.73970700  | 1.55057400  |
| HF(B3LYP/6-311+G(d,p)/Lanl2dz, SMD[toluene])= -3129.126309 |             |              |             | H  | -1.36794600 | 2.28121500  | 2.47725300  |
| Imaginary frequency is -150.68 <sup>-1</sup>               |             |              |             | H  | -0.04469100 | 2.30035700  | 1.29122500  |
| N                                                          | 5.98450100  | 0.27307000   | 0.61204600  | H  | -0.86364000 | 3.80732200  | 1.75873900  |
| C                                                          | 5.91109800  | 1.03714700   | -0.64355100 | C  | -1.53154800 | 3.50085700  | -0.75066300 |
| H                                                          | 6.92679200  | 1.34175500   | -0.91556100 | H  | -1.38866600 | 4.51470100  | -0.35344600 |
| H                                                          | 5.52191900  | 0.39457000   | -1.44453600 | H  | -0.56759000 | 3.17346100  | -1.15189500 |
| C                                                          | 5.07194700  | 2.30011500   | -0.52512400 | H  | -2.25147300 | 3.58311100  | -1.56853400 |
| C                                                          | 4.89497700  | -0.70924200  | 0.86249600  | C  | -3.39049600 | 3.13781300  | 0.90047900  |
| H                                                          | 5.27886900  | -1.40558000  | 1.61397200  | H  | -3.27870100 | 4.19087400  | 1.19251800  |
| H                                                          | 4.69635800  | -1.27136500  | -0.06019900 | H  | -4.17089700 | 3.08996200  | 0.13792900  |

|   |             |             |             |                                                        |              |                    |             |
|---|-------------|-------------|-------------|--------------------------------------------------------|--------------|--------------------|-------------|
| H | -3.73240400 | 2.58906100  | 1.78246900  | C                                                      | -8.73151500  | -1.61910600        | -2.22064300 |
| C | -1.85235300 | 1.08016400  | -2.93480400 | H                                                      | -8.56447200  | -2.61771800        | -2.64702800 |
| H | -2.23712400 | 0.86228600  | -3.93949500 | C                                                      | -10.11157000 | -1.63558400        | -1.53581600 |
| H | -1.64719600 | 2.14853400  | -2.89002700 | H                                                      | -10.35266200 | -0.65866200        | -1.10000200 |
| H | -0.90674500 | 0.54631600  | -2.81666700 | H                                                      | -10.89843400 | -1.87929700        | -2.25957100 |
| C | -4.21844600 | 1.37363300  | -2.12598700 | H                                                      | -10.14595900 | -2.37804600        | -0.73099600 |
| H | -4.08477200 | 2.45252600  | -2.00391000 | C                                                      | -8.70402200  | -0.60963500        | -3.38418100 |
| H | -4.56672800 | 1.20604300  | -3.15406900 | H                                                      | -8.88041500  | 0.41241800         | -3.02811400 |
| H | -5.01059700 | 1.03893900  | -1.45440600 | H                                                      | -7.73583300  | -0.62211200        | -3.89674400 |
| C | -3.13132300 | -0.89809700 | -2.21256100 | H                                                      | -9.48287500  | -0.84551400        | -4.11915800 |
| H | -2.21014500 | -1.47140400 | -2.06443700 | C                                                      | -6.54922600  | 1.33873800         | 1.25952300  |
| H | -3.92256000 | -1.33206700 | -1.60481700 | H                                                      | -5.54928700  | 1.53089100         | 1.65452800  |
| H | -3.42857800 | -1.00122800 | -3.26453800 | C                                                      | -7.00019900  | 2.59856600         | 0.49674300  |
| C | -3.02709600 | -0.10031800 | 1.30143700  | H                                                      | -8.05906700  | 2.54975500         | 0.21763500  |
| C | -4.32242000 | -0.65135800 | 1.54019200  | H                                                      | -6.87694200  | 3.48326000         | 1.13198800  |
| C | -2.09199100 | -0.20173900 | 2.36477600  | H                                                      | -6.42207000  | 2.75539700         | -0.41928800 |
| C | -4.61329500 | -1.14118700 | 2.83051400  | C                                                      | -7.48031900  | 1.10843300         | 2.47021300  |
| C | -2.39634600 | -0.72418900 | 3.61929800  | H                                                      | -7.51923000  | 2.00515700         | 3.10072900  |
| C | -3.68782300 | -1.17421300 | 3.86844000  | H                                                      | -8.50101900  | 0.88300400         | 2.13880300  |
| H | -5.60874300 | -1.54068900 | 2.99953200  | H                                                      | -7.13774400  | 0.27493200         | 3.09105600  |
| H | -1.62543700 | -0.76940400 | 4.38308900  | C                                                      | 4.00198900   | 2.41700900         | -1.33521200 |
| H | 1.13535900  | -2.74405300 | -1.30550700 | H                                                      | 3.74685600   | 1.58630600         | -1.98634100 |
| H | 1.89571300  | -3.02672200 | 0.36957900  | C                                                      | 3.00807700   | 3.49921400         | -1.42093700 |
| H | 1.51119900  | 0.91067000  | -1.44470500 | O                                                      | 3.17486333   | 4.59355169         | -0.90092900 |
| H | 1.00597600  | -0.63552100 | -2.29980400 | O                                                      | 1.88811910   | 3.18827848         | -2.11403767 |
| C | -5.44214400 | -0.88324300 | 0.55390500  | C                                                      | 0.91990094   | 4.24080452         | -2.22238796 |
| C | -6.47909400 | 0.07702500  | 0.39734200  | H                                                      | 0.59020470   | 4.56523700         | -1.23166132 |
| C | -5.56198500 | -2.14101900 | -0.09260100 | H                                                      | 1.33997095   | 5.09928596         | -2.75391696 |
| C | -7.52665200 | -0.17825300 | -0.49298200 | H                                                      | 0.08737824   | 3.81449361         | -2.78334018 |
| C | -6.62663700 | -2.32563900 | -0.99208300 |                                                        |              |                    |             |
| C | -7.60625700 | -1.36450000 | -1.22676800 |                                                        |              |                    |             |
| H | -8.30700200 | 0.56804000  | -0.61017300 | <b>2-Int3</b>                                          |              |                    |             |
| H | -6.69684000 | -3.27780500 | -1.51560100 | Zero-point correction=                                 | 1.093462     | (Hartree/Particle) |             |
| C | -4.73131400 | -3.42072400 | 0.15100300  | Thermal correction to Energy=                          | 1.160176     |                    |             |
| H | -4.76232100 | -3.95441400 | -0.80868200 | Thermal correction to Enthalpy=                        | 1.161121     |                    |             |
| C | -5.47378700 | -4.31784800 | 1.16982100  | Thermal correction to Gibbs Free Energy=               | 0.984763     |                    |             |
| H | -6.51539900 | -4.48551000 | 0.87633300  | Sum of electronic and zero-point Energies=             | -3130.029404 |                    |             |
| H | -4.97806000 | -5.29298400 | 1.24825800  | Sum of electronic and thermal Energies=                | -3129.962690 |                    |             |
| H | -5.47204900 | -3.86215200 | 2.16628300  | Sum of electronic and thermal Enthalpies=              | -3129.961745 |                    |             |
| C | -3.24350500 | -3.34076100 | 0.53534200  | Sum of electronic and thermal Free Energies=           | -3130.138103 |                    |             |
| H | -2.66843400 | -2.67770600 | -0.11379500 | HF(B3LYP/6-311+G(d,p)/Lanl2dz, SMD[ <i>toluene</i> ])= | -3129.144583 |                    |             |
| H | -3.09012200 | -3.02108900 | 1.56847400  | N                                                      | 5.12183000   | -0.22760000        | 0.97589800  |
| H | -2.81279000 | -4.34520200 | 0.44000800  | C                                                      | 5.16273400   | 1.00711700         | 0.16190800  |
| H | -1.07328300 | 0.15534100  | 2.21629100  | H                                                      | 6.18050600   | 1.40777700         | 0.19620300  |
| H | -3.96751800 | -1.57132000 | 4.84021400  | H                                                      | 4.93805900   | 0.75630600         | -0.88018300 |
|   |             |             |             | C                                                      | 4.20519400   | 2.08836400         | 0.66908500  |

|    |             |             |             |   |             |             |             |
|----|-------------|-------------|-------------|---|-------------|-------------|-------------|
| C  | 4.30149500  | -1.35098900 | 0.44388000  | C | -3.87628000 | 3.10979100  | -1.44747200 |
| H  | 4.51241900  | -2.21638100 | 1.07748000  | H | -4.02037700 | 4.13352800  | -1.81927900 |
| H  | 4.61486500  | -1.58066000 | -0.57882400 | H | -4.62304700 | 2.47726500  | -1.92853000 |
| C  | 2.82512600  | -1.01412400 | 0.50645800  | H | -4.07579900 | 3.12403100  | -0.37228600 |
| C  | 2.10119900  | -0.77088700 | -0.59579400 | C | -2.18012600 | -0.46879400 | -3.67949400 |
| C  | 2.41021700  | -0.75628000 | -2.02993900 | H | -2.60617200 | -1.26912800 | -4.29904100 |
| C  | 3.11622800  | -1.60043600 | -2.80858000 | H | -2.20415300 | 0.44694700  | -4.27095000 |
| C  | 1.40690500  | 0.25526700  | -2.49583400 | H | -1.13768600 | -0.72418800 | -3.47572700 |
| S  | 6.54363700  | -0.64903100 | 1.78449700  | C | -4.47169500 | -0.09163000 | -2.71851400 |
| O  | 7.13031700  | 0.60647000  | 2.27426300  | H | -4.58134800 | 0.84691000  | -3.26967800 |
| O  | 6.19342700  | -1.73881200 | 2.69956800  | H | -4.85641000 | -0.89069400 | -3.36722900 |
| C  | 7.68180700  | -1.31288800 | 0.56311200  | H | -5.10741300 | -0.05746300 | -1.83147300 |
| C  | 7.61168100  | -2.66488000 | 0.21448300  | C | -2.89988500 | -1.79747100 | -1.74303200 |
| C  | 8.61464300  | -0.46884400 | -0.04549000 | H | -1.85854800 | -2.04742200 | -1.50957700 |
| C  | 8.47043700  | -3.16230600 | -0.76319500 | H | -3.50353700 | -1.89770800 | -0.84377900 |
| H  | 6.91360000  | -3.32079900 | 0.72400000  | H | -3.26463500 | -2.53606800 | -2.46941800 |
| C  | 9.46661200  | -0.98460600 | -1.02103300 | C | -2.65752200 | 0.85808300  | 0.64530000  |
| H  | 8.68983400  | 0.56713600  | 0.26734700  | C | -3.75732400 | 0.36486900  | 1.41100400  |
| C  | 9.40375500  | -2.33239400 | -1.40215100 | C | -1.64867100 | 1.55104300  | 1.35895700  |
| H  | 8.42181300  | -4.21575900 | -1.02805900 | C | -3.81792400 | 0.69039300  | 2.78239800  |
| H  | 10.19949700 | -0.33045000 | -1.48735400 | C | -1.72547600 | 1.84387200  | 2.71857200  |
| C  | 10.30894000 | -2.87595600 | -2.48196900 | C | -2.84015000 | 1.42940100  | 3.43987300  |
| H  | 10.56487200 | -3.92534800 | -2.30012300 | H | -4.66332500 | 0.31226000  | 3.34950700  |
| H  | 9.82143000  | -2.82572000 | -3.46499500 | H | -0.91567800 | 2.38556800  | 3.19947500  |
| H  | 11.24058500 | -2.30459500 | -2.55015000 | H | 3.07457100  | -1.52311000 | -3.89328700 |
| C  | 4.34111200  | 2.35421200  | 2.14593600  | H | 3.69168200  | -2.42566000 | -2.39951900 |
| H  | 3.85023300  | 1.57278900  | 2.73390200  | H | 1.67143400  | 1.30893700  | -2.36998900 |
| H  | 5.39451000  | 2.32249200  | 2.42135300  | H | 0.90010700  | 0.05894700  | -3.44317000 |
| H  | 3.93062800  | 3.29589000  | 2.42496300  | C | -4.85056700 | -0.58305400 | 0.97817700  |
| C  | 2.23938600  | -1.00845900 | 1.90002000  | C | -6.11204500 | -0.09284800 | 0.54175600  |
| H  | 2.12546400  | -2.03488700 | 2.28050600  | C | -4.68254600 | -1.97566300 | 1.17604500  |
| H  | 2.89148700  | -0.48771800 | 2.61250900  | C | -7.11382700 | -0.99833400 | 0.17729500  |
| H  | 1.25181500  | -0.53603700 | 1.91738900  | C | -5.71904900 | -2.83632100 | 0.77114800  |
| Pd | 0.20322500  | -0.03203800 | -0.82940300 | C | -6.92934400 | -2.38196000 | 0.25166600  |
| P  | -2.10025100 | 0.83445300  | -1.18109300 | H | -8.06879900 | -0.61060000 | -0.16609100 |
| C  | -3.00600900 | -0.39443400 | -2.37052500 | H | -5.57357100 | -3.90892500 | 0.88977700  |
| C  | -2.42796100 | 2.67031800  | -1.73372900 | C | -3.52699900 | -2.67911900 | 1.91996200  |
| C  | -1.51162700 | 3.68341800  | -0.99921600 | H | -3.47711300 | -3.68198100 | 1.47485400  |
| H  | -0.92693790 | 3.20169325  | -0.20959626 | C | -3.92930800 | -2.87892200 | 3.40116100  |
| H  | -0.82124395 | 4.32429529  | -1.58790428 | H | -4.90622200 | -3.36601800 | 3.49160200  |
| H  | -2.20035903 | 4.37542904  | -0.48892466 | H | -3.18672600 | -3.50064100 | 3.91658200  |
| C  | -2.12635400 | 2.80166000  | -3.23923400 | H | -3.98026700 | -1.91721300 | 3.92423200  |
| H  | -1.27045291 | 3.47693847  | -3.36417602 | C | -2.09667900 | -2.11567100 | 1.85432200  |
| H  | -1.85582462 | 1.84082427  | -3.68814972 | H | -1.76885800 | -1.91254100 | 0.83266300  |
| H  | -2.95976407 | 3.23587781  | -3.79856149 | H | -1.97803500 | -1.20053400 | 2.44121400  |

|                                                            |              |             |             |    |              |             |             |
|------------------------------------------------------------|--------------|-------------|-------------|----|--------------|-------------|-------------|
| H                                                          | -1.41290900  | -2.86425400 | 2.27354300  | C  | -4.76061200  | 0.59144400  | 0.37063500  |
| H                                                          | -0.76009600  | 1.87360100  | 0.82365900  | H  | -5.01062300  | 1.61028600  | 0.68622800  |
| H                                                          | -2.93752300  | 1.64621900  | 4.50018000  | H  | -5.09621300  | -0.09404600 | 1.15873200  |
| C                                                          | -8.01282800  | -3.36016400 | -0.18356200 | C  | -3.24837200  | 0.53719900  | 0.21016700  |
| H                                                          | -7.62188900  | -4.37212500 | -0.00896400 | C  | -5.80307400  | -1.06241500 | -1.20378300 |
| C                                                          | -9.29605000  | -3.21077500 | 0.65612600  | H  | -6.09478500  | -1.10064200 | -2.25878000 |
| H                                                          | -9.75280900  | -2.22368300 | 0.51531400  | H  | -6.68336100  | -1.39329300 | -0.61893900 |
| H                                                          | -10.03793000 | -3.96422700 | 0.36454000  | C  | -4.66662100  | -2.03165000 | -0.94064500 |
| H                                                          | -9.08709900  | -3.33295700 | 1.72471100  | C  | -3.44136400  | -1.66780900 | -0.55868800 |
| C                                                          | -8.32042300  | -3.23689500 | -1.68833900 | C  | -2.37068300  | -2.49649600 | -0.17496600 |
| H                                                          | -8.73047300  | -2.24883700 | -1.93043500 | C  | -2.04406700  | -2.72315500 | 1.19694900  |
| H                                                          | -7.41626000  | -3.37955400 | -2.29027200 | C  | -1.19103000  | -2.85593400 | -0.97644600 |
| H                                                          | -9.05791100  | -3.98843700 | -1.99556600 | S  | -6.54280100  | 1.50279200  | -1.44048200 |
| C                                                          | -6.45663100  | 1.39852600  | 0.57082000  | O  | -5.93817100  | 2.80324700  | -1.12898600 |
| H                                                          | -5.51996600  | 1.96073700  | 0.59184800  | O  | -6.89701400  | 1.12670800  | -2.81167500 |
| C                                                          | -7.26633200  | 1.88259300  | -0.64703100 | C  | -8.03872800  | 1.36638700  | -0.45121900 |
| H                                                          | -8.29074700  | 1.49171300  | -0.63781100 | C  | -9.04753300  | 0.48103200  | -0.84053500 |
| H                                                          | -7.34034800  | 2.97623700  | -0.63411600 | C  | -8.17225900  | 2.12696600  | 0.71354800  |
| H                                                          | -6.80486300  | 1.58477000  | -1.59330700 | C  | -10.18602600 | 0.35081900  | -0.04647400 |
| C                                                          | -7.22433200  | 1.74362300  | 1.86648000  | H  | -8.95116000  | -0.07190300 | -1.76873700 |
| H                                                          | -7.45835400  | 2.81491000  | 1.90004000  | C  | -9.31770900  | 1.98490900  | 1.49449700  |
| H                                                          | -8.16900300  | 1.18896900  | 1.91834000  | H  | -7.40127400  | 2.84100300  | 0.98240000  |
| H                                                          | -6.64232200  | 1.49807700  | 2.76035000  | C  | -10.33723300 | 1.09165400  | 1.13420700  |
| C                                                          | 3.44165100   | 2.68663200  | -0.26521200 | H  | -10.97526700 | -0.33060000 | -0.35507100 |
| H                                                          | 3.54356300   | 2.26614800  | -1.26106400 | H  | -9.42681800  | 2.58592000  | 2.39419700  |
| C                                                          | 2.25994700   | 3.60229800  | -0.35030200 | C  | -11.56120400 | 0.92317800  | 2.00320900  |
| O                                                          | 1.45667100   | 3.43711900  | -1.25044200 | H  | -12.43409300 | 0.62485800  | 1.41331700  |
| O                                                          | 2.03013000   | 4.69427900  | 0.43413100  | H  | -11.40074100 | 0.14692600  | 2.76346500  |
| C                                                          | 2.50588600   | 4.86609400  | 1.75552500  | H  | -11.80810700 | 1.84955100  | 2.53238200  |
| H                                                          | 2.15449500   | 5.83732600  | 2.08887300  | C  | -2.73581400  | 1.22012400  | -1.03981600 |
| H                                                          | 2.09203400   | 4.09379300  | 2.42158400  | H  | -1.64787300  | 1.16185000  | -1.11733000 |
| H                                                          | 3.58584500   | 4.83032100  | 1.82256000  | H  | -3.17881600  | 0.76844800  | -1.92713500 |
|                                                            |              |             |             | H  | -3.03401800  | 2.27739800  | -1.04371300 |
| <b>2-Ts3</b>                                               |              |             |             | C  | -5.11897100  | -3.47167600 | -1.14028800 |
| Zero-point correction= 1.092948 (Hartree/Particle)         |              |             |             | H  | -5.95044800  | -3.73101800 | -0.46768500 |
| Thermal correction to Energy= 1.158082                     |              |             |             | H  | -5.48498400  | -3.63829800 | -2.16428400 |
| Thermal correction to Enthalpy= 1.159027                   |              |             |             | H  | -4.30295600  | -4.17542200 | -0.95673000 |
| Thermal correction to Gibbs Free Energy= 0.990093          |              |             |             | Pd | -0.22518200  | -1.68936000 | 0.49041500  |
| Sum of electronic and zero-point Energies= -3130.003441    |              |             |             | P  | 2.08476200   | -1.40915400 | -0.35664800 |
| Sum of electronic and thermal Energies= -3129.938306       |              |             |             | C  | 2.19697400   | -0.10299100 | -1.76629500 |
| Sum of electronic and thermal Enthalpies= -3129.937362     |              |             |             | C  | 2.72536600   | -3.14087700 | -0.98594500 |
| Sum of electronic and thermal Free Energies= -3130.106296  |              |             |             | C  | 2.27500100   | -4.22914500 | 0.01372100  |
| HF(B3LYP/6-311+G(d,p)/Lanl2dz, SMD[toluene])= -3129.119502 |              |             |             | H  | 2.76355300   | -4.12159000 | 0.98549000  |
| Imaginary frequency is -184.14 <sup>-1</sup>               |              |             |             | H  | 1.19288100   | -4.22373800 | 0.16959100  |
| N                                                          | -5.47506900  | 0.33091300  | -0.88494000 | H  | 2.55868600   | -5.21065800 | -0.38858200 |

|   |             |             |             |                                            |              |                    |             |
|---|-------------|-------------|-------------|--------------------------------------------|--------------|--------------------|-------------|
| C | 2.10832500  | -3.48131700 | -2.35775000 | H                                          | 7.25902900   | 2.68314200         | -3.56361600 |
| H | 2.36827900  | -4.51839400 | -2.60721100 | H                                          | 5.69089800   | 3.49918800         | -3.46457900 |
| H | 1.01877300  | -3.40696400 | -2.35505700 | H                                          | 7.15808900   | 4.43221300         | -3.82297900 |
| H | 2.49926100  | -2.85212700 | -3.16122800 | C                                          | 8.47383000   | 4.03877100         | -1.41331500 |
| C | 4.25426000  | -3.22375200 | -1.09431800 | H                                          | 8.88415700   | 4.87563900         | -1.99108600 |
| H | 4.53479600  | -4.21238800 | -1.48276900 | H                                          | 8.63141700   | 4.24828700         | -0.34960900 |
| H | 4.67054300  | -2.47497200 | -1.76926400 | H                                          | 9.05460400   | 3.14399200         | -1.66742500 |
| H | 4.72509000  | -3.11130700 | -0.11504900 | C                                          | 3.83547400   | 2.64052500         | 1.94427900  |
| C | 0.99812500  | -0.34118400 | -2.71618400 | H                                          | 3.41864900   | 3.55710300         | 1.50441700  |
| H | 0.99342900  | 0.46274300  | -3.46345600 | C                                          | 4.75007600   | 3.09385300         | 3.10839300  |
| H | 1.04912100  | -1.28724600 | -3.25694700 | H                                          | 5.56091100   | 3.74288500         | 2.76082100  |
| H | 0.04630700  | -0.30370600 | -2.17887000 | H                                          | 4.16533100   | 3.64385500         | 3.85572000  |
| C | 3.49741800  | -0.09907400 | -2.58750500 | H                                          | 5.20028400   | 2.22895000         | 3.60904800  |
| H | 3.64404900  | -1.03086800 | -3.14169200 | C                                          | 2.63881300   | 1.86487700         | 2.51317500  |
| H | 3.44434400  | 0.71082800  | -3.32756200 | H                                          | 1.96055600   | 1.48421600         | 1.75186000  |
| H | 4.37665300  | 0.08366700  | -1.96802500 | H                                          | 2.93919200   | 1.02955600         | 3.14915900  |
| C | 1.98072000  | 1.28558300  | -1.13474000 | H                                          | 2.05704100   | 2.55227900         | 3.13993700  |
| H | 1.07564100  | 1.32826800  | -0.52324400 | C                                          | 6.86355200   | -0.98346100        | -0.23920700 |
| H | 2.82776400  | 1.59497800  | -0.52564100 | C                                          | 7.28930600   | -1.44753600        | -1.64564000 |
| H | 1.87207000  | 2.02040200  | -1.94391600 | H                                          | 7.58682000   | -2.50222100        | -1.61861800 |
| C | 3.20547100  | -1.11691500 | 1.16094300  | H                                          | 6.48413400   | -1.34004600        | -2.37898700 |
| C | 4.41283900  | -0.39857800 | 1.44188300  | H                                          | 8.15147000   | -0.88107200        | -2.01615200 |
| C | 2.66709900  | -1.88595000 | 2.21845600  | C                                          | 8.09210600   | -1.00388300        | 0.69746900  |
| C | 5.03713900  | -0.61393700 | 2.68775700  | H                                          | 8.84176000   | -0.27270900        | 0.37236400  |
| C | 3.29464300  | -2.06183700 | 3.44850800  | H                                          | 7.81889500   | -0.76588800        | 1.72994100  |
| H | 1.70067100  | -2.36091000 | 2.07711700  | H                                          | 8.56172500   | -1.99533900        | 0.69255000  |
| C | 4.51691400  | -1.44126600 | 3.67748500  | H                                          | 6.15036500   | -1.70977400        | 0.15354900  |
| H | 5.95418500  | -0.06818400 | 2.88759300  | C                                          | -2.48383300  | 0.45641700         | 1.37095800  |
| H | 2.82026900  | -2.67024200 | 4.21334500  | H                                          | -2.87886300  | -0.12071700        | 2.20337900  |
| H | -1.48322900 | -3.61820100 | 1.46710700  | C                                          | -1.08113300  | 0.77433200         | 1.52020800  |
| H | -2.66422900 | -2.30538600 | 1.98270500  | O                                          | -0.47381672  | 0.70222300         | 2.73854553  |
| H | -0.83771600 | -3.88111000 | -0.85986400 | O                                          | -0.30968151  | 1.10418089         | 0.58866971  |
| H | -1.14426700 | -2.48950300 | -2.00045000 | C                                          | -0.93440516  | -0.17349940        | 3.77307123  |
| H | 5.04159800  | -1.56265100 | 4.62125000  | H                                          | -1.24681770  | 0.41830331         | 4.63654815  |
| C | 5.08645300  | 0.68624700  | 0.62776400  | H                                          | -1.76815820  | -0.78580716        | 3.42327438  |
| C | 6.19998400  | 0.39439500  | -0.20990600 | H                                          | -0.08846682  | -0.80808395        | 4.05519001  |
| C | 4.72574200  | 2.04548800  | 0.83094800  |                                            |              |                    |             |
| C | 6.79553100  | 1.41928200  | -0.95244400 | <b>2-Int4</b>                              |              |                    |             |
| C | 5.34538600  | 3.02444700  | 0.03397100  | Zero-point correction=                     | 1.097557     | (Hartree/Particle) |             |
| C | 6.35585500  | 2.74279800  | -0.88055600 | Thermal correction to Energy=              | 1.162211     |                    |             |
| H | 7.63404200  | 1.17605300  | -1.59852700 | Thermal correction to Enthalpy=            | 1.163155     |                    |             |
| H | 5.03353800  | 4.05988400  | 0.16130500  | Thermal correction to Gibbs Free Energy=   | 0.995551     |                    |             |
| C | 6.97802000  | 3.84468100  | -1.72734500 | Sum of electronic and zero-point Energies= | -3130.082350 |                    |             |
| H | 6.46378300  | 4.77987800  | -1.46668500 | Sum of electronic and thermal Energies=    | -3130.017696 |                    |             |
| C | 6.75680200  | 3.59996000  | -3.23227200 | Sum of electronic and thermal Enthalpies=  | -3130.016752 |                    |             |



|                                                            |             |             |             |   |             |             |             |
|------------------------------------------------------------|-------------|-------------|-------------|---|-------------|-------------|-------------|
| Sum of electronic and thermal Free Energies= -3130.184357  |             |             |             | H | -1.31109900 | 2.43595200  | 3.11435000  |
| HF(B3LYP/6-311+G(d,p)/LanL2dz, SMD[toluene])= -3130.922961 |             |             |             | H | -0.23622000 | 3.17360500  | 1.91238200  |
| N                                                          | 5.47213300  | -0.30250500 | -1.39843900 | H | -1.37088300 | 4.17507500  | 2.84254200  |
| C                                                          | 4.33047700  | -0.59889200 | -0.52806000 | C | -2.30725300 | 4.33452400  | 0.40436800  |
| H                                                          | 4.06426500  | -1.64914900 | -0.65062800 | H | -2.40500300 | 5.20207400  | 1.06949700  |
| H                                                          | 4.55320600  | -0.40289000 | 0.53127900  | H | -1.36420000 | 4.44692900  | -0.13848200 |
| C                                                          | 3.13029000  | 0.28231200  | -0.94833800 | H | -3.13095900 | 4.38574300  | -0.31114900 |
| C                                                          | 5.94410800  | 1.08612000  | -1.39947900 | C | -3.70372300 | 2.98027300  | 1.98164200  |
| H                                                          | 6.40817000  | 1.28463100  | -2.37144100 | H | -3.85490400 | 3.89626600  | 2.56882500  |
| H                                                          | 6.73617200  | 1.23681900  | -0.64078700 | H | -4.53924600 | 2.89580500  | 1.28307600  |
| C                                                          | 4.85969800  | 2.10679100  | -1.11600800 | H | -3.74404000 | 2.13566300  | 2.67463200  |
| C                                                          | 3.58279900  | 1.75914400  | -0.84707600 | C | -2.15538500 | 2.59191500  | -2.37781000 |
| C                                                          | 2.53832800  | 2.71792600  | -0.39190100 | H | -2.60001600 | 2.54384900  | -3.38002500 |
| C                                                          | 2.79970600  | 3.67112600  | 0.52878800  | H | -2.25140400 | 3.62072900  | -2.03227900 |
| C                                                          | 1.15551700  | 2.57994100  | -0.91791500 | H | -1.09367400 | 2.35470900  | -2.47538500 |
| S                                                          | 6.63961800  | -1.48481500 | -1.62839700 | C | -4.38280800 | 1.91399200  | -1.42535000 |
| O                                                          | 5.93114800  | -2.75795200 | -1.77849500 | H | -4.55591600 | 2.90920000  | -1.00452200 |
| O                                                          | 7.54262000  | -0.97238600 | -2.66401500 | H | -4.79018400 | 1.92019300  | -2.44527700 |
| C                                                          | 7.58574500  | -1.57878000 | -0.10192000 | H | -4.95552000 | 1.18568000  | -0.85042700 |
| C                                                          | 8.75433500  | -0.82649700 | 0.03733000  | C | -2.70178500 | 0.19956100  | -2.19512500 |
| C                                                          | 7.12836200  | -2.38249000 | 0.94702600  | H | -1.64222400 | -0.07115400 | -2.25880400 |
| C                                                          | 9.45964800  | -0.87578800 | 1.23995200  | H | -3.24766800 | -0.60362500 | -1.70508200 |
| H                                                          | 9.11682300  | -0.23841900 | -0.79896900 | H | -3.08769000 | 0.28314900  | -3.21959000 |
| C                                                          | 7.84487100  | -2.41888800 | 2.14094700  | C | -2.44240800 | 0.05604800  | 1.39527800  |
| H                                                          | 6.23932800  | -2.98966900 | 0.81400600  | C | -3.51303300 | -0.88212300 | 1.51176100  |
| C                                                          | 9.01538700  | -1.66353600 | 2.31021900  | C | -1.41903800 | -0.02855300 | 2.37272600  |
| H                                                          | 10.37573400 | -0.29924400 | 1.34444900  | C | -3.53777700 | -1.73108000 | 2.63780400  |
| H                                                          | 7.49502100  | -3.05212400 | 2.95295300  | C | -1.45602000 | -0.89632200 | 3.46109600  |
| C                                                          | 9.76827100  | -1.69202100 | 3.61958600  | H | -0.54180500 | 0.60396300  | 2.27314700  |
| H                                                          | 10.81175400 | -1.38775000 | 3.48921400  | C | -2.54737700 | -1.74310300 | 3.61414900  |
| H                                                          | 9.31578000  | -1.00778800 | 4.34984800  | H | -4.36385900 | -2.43117200 | 2.71652100  |
| H                                                          | 9.75884500  | -2.69252900 | 4.06567100  | H | -0.63223600 | -0.90477200 | 4.16894400  |
| C                                                          | 2.72021000  | -0.08434800 | -2.39511800 | H | 2.02823400  | 4.36648700  | 0.85246700  |
| H                                                          | 1.87089000  | 0.52157200  | -2.72372400 | H | 3.77228000  | 3.77142000  | 0.99797800  |
| H                                                          | 3.54283900  | 0.05058400  | -3.10336900 | H | 0.52980400  | 3.43484600  | -0.66061400 |
| H                                                          | 2.40933300  | -1.13549300 | -2.41493300 | H | 1.10480800  | 2.37514100  | -1.98977700 |
| C                                                          | 5.41166100  | 3.51448300  | -1.16309000 | H | -2.61608700 | -2.42620500 | 4.45618600  |
| H                                                          | 6.02564300  | 3.74446900  | -0.28026200 | C | -4.61352100 | -1.18717600 | 0.52404300  |
| H                                                          | 6.06805600  | 3.63273200  | -2.03612200 | C | -5.89475600 | -0.58564500 | 0.65992200  |
| H                                                          | 4.62071300  | 4.26396300  | -1.22254500 | C | -4.43075900 | -2.21608000 | -0.43647800 |
| Pd                                                         | 0.31651300  | 0.88426800  | -0.07384600 | C | -6.91083000 | -0.91725400 | -0.24174300 |
| P                                                          | -1.96310500 | 1.46977800  | 0.19997400  | C | -5.48429300 | -2.48485300 | -1.32775900 |
| C                                                          | -2.88943700 | 1.55673400  | -1.48913500 | C | -6.71939200 | -1.84437500 | -1.26923700 |
| C                                                          | -2.34396800 | 3.05733300  | 1.26881000  | H | -7.88190600 | -0.44296300 | -0.13303800 |
| C                                                          | -1.24203600 | 3.20612400  | 2.34275300  | H | -5.33064600 | -3.24881500 | -2.08816300 |

|                                                    |             |             |             |                                                            |             |             |             |
|----------------------------------------------------|-------------|-------------|-------------|------------------------------------------------------------|-------------|-------------|-------------|
| C                                                  | -7.81927000 | -2.17131400 | -2.27037200 | Sum of electronic and zero-point Energies=-3130.063080     |             |             |             |
| H                                                  | -7.41848800 | -2.93510500 | -2.95063700 | Sum of electronic and thermal Energies= -3129.998441       |             |             |             |
| C                                                  | -8.19513900 | -0.94467100 | -3.12353400 | Sum of electronic and thermal Enthalpies= -3129.997497     |             |             |             |
| H                                                  | -8.61769100 | -0.14426000 | -2.50435800 | Sum of electronic and thermal Free Energies= -3130.165871  |             |             |             |
| H                                                  | -7.31916900 | -0.53912600 | -3.64169700 | HF(B3LYP/6-311+G(d,p)/Lanl2dz, SMD[toluene])= -3130.903828 |             |             |             |
| H                                                  | -8.94417700 | -1.21325500 | -3.87797000 | Imaginary frequency is -326.78 <sup>-1</sup>               |             |             |             |
| C                                                  | -9.06269000 | -2.77062700 | -1.58604200 | N                                                          | 5.41457500  | 0.60348800  | 1.28846100  |
| H                                                  | -9.81495400 | -3.05252600 | -2.33230100 | C                                                          | 4.42104700  | 0.33348000  | 0.24238500  |
| H                                                  | -8.80475700 | -3.66410000 | -1.00698500 | H                                                          | 4.04632500  | 1.28345800  | -0.13987900 |
| H                                                  | -9.52799700 | -2.05119100 | -0.90164200 | H                                                          | 4.84706000  | -0.25060900 | -0.58650800 |
| C                                                  | -3.24752200 | -3.20162600 | -0.56261900 | C                                                          | 3.27088400  | -0.47242000 | 0.87892700  |
| H                                                  | -3.22883000 | -3.47337500 | -1.62668800 | C                                                          | 6.08014400  | -0.58175700 | 1.83762600  |
| C                                                  | -3.58803700 | -4.49852400 | 0.20975400  | H                                                          | 6.53243500  | -0.30140300 | 2.79451700  |
| H                                                  | -4.56464400 | -4.89787200 | -0.08342100 | H                                                          | 6.90490500  | -0.92041700 | 1.18153000  |
| H                                                  | -2.83011300 | -5.26622900 | 0.01320500  | C                                                          | 5.13147700  | -1.74641300 | 2.02812100  |
| H                                                  | -3.60651500 | -4.31725900 | 1.29020400  | C                                                          | 3.85524600  | -1.67925800 | 1.61213100  |
| C                                                  | -1.81117500 | -2.76982300 | -0.21823000 | C                                                          | 2.83433900  | -2.74364800 | 1.61859800  |
| H                                                  | -1.52095900 | -1.83359500 | -0.69953600 | C                                                          | 2.51645600  | -3.53120700 | 2.66218200  |
| H                                                  | -1.64496600 | -2.66772900 | 0.85636500  | C                                                          | 2.10055600  | -2.82796100 | 0.33459800  |
| H                                                  | -1.12542900 | -3.54553700 | -0.57956100 | S                                                          | 6.35598100  | 1.99565100  | 1.15210200  |
| C                                                  | -6.23682400 | 0.33595200  | 1.83270000  | O                                                          | 5.44952400  | 3.07030700  | 0.74409100  |
| C                                                  | -7.08937000 | 1.55902800  | 1.44499500  | O                                                          | 7.14690800  | 2.06765700  | 2.38366600  |
| H                                                  | -7.17061400 | 2.24263000  | 2.29803500  | C                                                          | 7.49965700  | 1.71102500  | -0.20389000 |
| H                                                  | -6.65857800 | 2.11352100  | 0.60539000  | C                                                          | 8.76100700  | 1.16986300  | 0.05642300  |
| H                                                  | -8.10986900 | 1.27329800  | 1.16534100  | C                                                          | 7.10935500  | 2.01128100  | -1.51257800 |
| C                                                  | -6.95369000 | -0.45827700 | 2.94674600  | C                                                          | 9.62848400  | 0.91959600  | -1.00660400 |
| H                                                  | -7.89690000 | -0.87958100 | 2.57906200  | H                                                          | 9.06453000  | 0.98019600  | 1.08044200  |
| H                                                  | -6.33842000 | -1.28525000 | 3.31419100  | C                                                          | 7.98883200  | 1.75374600  | -2.56164400 |
| H                                                  | -7.18360100 | 0.19518700  | 3.79723500  | H                                                          | 6.14236600  | 2.46667900  | -1.69768800 |
| H                                                  | -5.29920900 | 0.70608600  | 2.25356800  | C                                                          | 9.25656300  | 1.19898700  | -2.32873500 |
| C                                                  | 2.11287200  | 0.00276100  | -0.04123600 | H                                                          | 10.61494100 | 0.50966000  | -0.80383500 |
| H                                                  | 2.66003169  | 0.20035531  | 0.85680229  | H                                                          | 7.69006600  | 1.99705900  | -3.57846700 |
| C                                                  | 2.14761222  | -1.50722560 | -0.34179144 | C                                                          | 10.19028100 | 0.90072200  | -3.47788800 |
| O                                                  | 3.32615041  | -2.14023590 | -0.46778905 | H                                                          | 9.95114000  | -0.06717800 | -3.93836600 |
| O                                                  | 0.92564043  | -2.23569023 | -0.48678877 | H                                                          | 10.11389800 | 1.66002600  | -4.26359100 |
| C                                                  | 1.21859259  | -3.60843211 | -0.76002632 | H                                                          | 11.23277700 | 0.85688300  | -3.14694800 |
| H                                                  | 1.78751830  | -3.67872888 | -1.66350952 | C                                                          | 2.43402900  | 0.41046400  | 1.81648200  |
| H                                                  | 1.78320801  | -4.02071331 | 0.04999445  | H                                                          | 1.66973200  | -0.18834800 | 2.32154500  |
| H                                                  | 0.30425331  | -4.15301024 | -0.87101428 | H                                                          | 3.06815300  | 0.88779000  | 2.57065700  |
|                                                    |             |             |             | H                                                          | 1.92966900  | 1.18806100  | 1.23231700  |
| <b>2-Ts4</b>                                       |             |             |             | C                                                          | 5.78005300  | -2.95421900 | 2.65560200  |
| Zero-point correction= 1.095977 (Hartree/Particle) |             |             |             | H                                                          | 5.18779600  | -3.85966000 | 2.50323800  |
| Thermal correction to Energy= 1.160615             |             |             |             | H                                                          | 6.78063900  | -3.11898100 | 2.23398200  |
| Thermal correction to Enthalpy= 1.161559           |             |             |             | H                                                          | 5.91501400  | -2.81798000 | 3.73780900  |
| Thermal correction to Gibbs Free Energy= 0.993186  |             |             |             | Pd                                                         | 0.17049140  | -1.35434787 | -0.25005599 |

|   |             |             |             |           |              |             |             |
|---|-------------|-------------|-------------|-----------|--------------|-------------|-------------|
| P | -2.11028260 | -1.60766987 | -0.47463499 | C         | -7.25167660  | 0.58654013  | 0.48892801  |
| C | -2.90109760 | -1.85508387 | 1.26514701  | C         | -7.00882660  | 1.49317713  | 1.52195601  |
| C | -2.58216060 | -3.10220887 | -1.63465199 | H         | -5.57927660  | 2.87151013  | 2.31297401  |
| C | -1.62448560 | -3.09321487 | -2.84680399 | H         | -8.22658560  | 0.11109013  | 0.42336301  |
| H | -1.79280560 | -2.23302487 | -3.49963399 | C         | -8.06131760  | 1.80434513  | 2.57813801  |
| H | -0.57586860 | -3.08432787 | -2.53061699 | H         | -7.62586860  | 2.55165213  | 3.25558801  |
| H | -1.80230960 | -3.99777487 | -3.44420699 | C         | -8.40707860  | 0.56292713  | 3.42258301  |
| C | -2.35822660 | -4.43613587 | -0.89522699 | H         | -9.12037060  | 0.81993113  | 4.21500301  |
| H | -2.46789160 | -5.25945487 | -1.61331199 | H         | -8.86153160  | -0.22247987 | 2.80680301  |
| H | -1.35122260 | -4.50321487 | -0.47002099 | H         | -7.51146760  | 0.14189113  | 3.89250501  |
| H | -3.08653860 | -4.60577487 | -0.09821199 | C         | -9.33038060  | 2.42498913  | 1.96339401  |
| C | -4.02279860 | -3.05228487 | -2.16542999 | H         | -10.04723360 | 2.69554313  | 2.74799601  |
| H | -4.20779360 | -3.92951587 | -2.80094099 | H         | -9.09240160  | 3.32877913  | 1.39178601  |
| H | -4.76702960 | -3.06301587 | -1.36628299 | H         | -9.82988260  | 1.72269813  | 1.28534301  |
| H | -4.18714060 | -2.16291887 | -2.77981399 | C         | -6.70184160  | -0.61985387 | -1.64774099 |
| C | -2.04786760 | -2.89652687 | 2.03014001  | H         | -5.79424760  | -0.91449087 | -2.17884699 |
| H | -2.39779160 | -2.92538687 | 3.07070601  | C         | -7.58428560  | 0.15660013  | -2.64906599 |
| H | -2.13228960 | -3.90847987 | 1.63114801  | H         | -7.85878960  | -0.48409387 | -3.49614999 |
| H | -0.99074760 | -2.61110187 | 2.03384601  | H         | -8.50996660  | 0.49957413  | -2.17158899 |
| C | -4.37702860 | -2.28106887 | 1.30989701  | H         | -7.06721860  | 1.03596713  | -3.04561799 |
| H | -4.53876160 | -3.26623087 | 0.86115901  | C         | -7.42720360  | -1.90716387 | -1.21081899 |
| H | -4.70033360 | -2.34749787 | 2.35787201  | H         | -8.41775460  | -1.69454587 | -0.79220599 |
| H | -5.02825260 | -1.55929687 | 0.81458301  | H         | -7.57687360  | -2.56490687 | -2.07510299 |
| C | -2.72079060 | -0.52285387 | 2.01441801  | H         | -6.86091060  | -2.46180987 | -0.45624999 |
| H | -2.98378660 | -0.66571087 | 3.07131801  | C         | -3.49339460  | 2.72140213  | 0.61950901  |
| H | -1.68180760 | -0.17743587 | 1.96637301  | H         | -2.70070960  | 2.16510413  | 0.10947501  |
| H | -1.99550360 | 3.53943813  | 1.95683501  | C         | -3.71580560  | 4.03580713  | -0.16184199 |
| C | -2.78900760 | -0.12752687 | -1.48410299 | H         | -4.51403560  | 4.62910513  | 0.30079901  |
| C | -3.96651560 | 0.68424813  | -1.48539799 | H         | -2.80027360  | 4.63963413  | -0.15862399 |
| C | -1.85122560 | 0.11851113  | -2.51663499 | H         | -3.99207460  | 3.84907413  | -1.20293299 |
| C | -4.16913060 | 1.55774613  | -2.57648699 | C         | -2.97945860  | 3.06277213  | 2.03197901  |
| C | -2.07082160 | 0.99882213  | -3.57174199 | H         | -3.63907260  | 3.77071913  | 2.54750601  |
| H | -0.89728960 | -0.39945187 | -2.47293899 | H         | -2.87586660  | 2.17693013  | 2.66501701  |
| C | -3.26523660 | 1.70826413  | -3.62219699 | H         | -3.37121460  | 0.25165813  | 1.61599301  |
| H | -5.07074960 | 2.16293913  | -2.57054199 | C         | 2.46623291   | -1.03638536 | -0.26630690 |
| H | -1.30706560 | 1.12837813  | -4.33374199 | H         | 3.00522262   | -1.18587332 | -1.17847106 |
| H | 1.72269400  | -4.27067300 | 2.59183900  | C         | 1.71062803   | 0.27805641  | -0.53631446 |
| H | 3.03643100  | -3.45922900 | 3.61225100  | O         | 0.35060677   | 0.29239192  | -0.53925921 |
| H | 2.66579600  | -3.14135700 | -0.53735000 | O         | 2.43891214   | 1.48353723  | -0.78393968 |
| H | 1.14187100  | -3.34229500 | 0.41069500  | C         | 2.24048437   | 1.89021053  | -2.14045848 |
| H | -3.47805360 | 2.39795713  | -4.43457999 | H         | 2.31962902   | 1.03854524  | -2.78334445 |
| C | -5.00730460 | 0.88059413  | -0.40131699 | H         | 1.26867753   | 2.32591524  | -2.24367117 |
| C | -4.76799460 | 1.86650713  | 0.59620501  | H         | 2.98467275   | 2.61046500  | -2.40937696 |
| C | -6.28982360 | 0.28104313  | -0.48241199 |           |              |             |             |
| C | -5.76767160 | 2.13099313  | 1.54047501  | <b>2a</b> |              |             |             |

|                                                            |             |             |             |                                                            |             |             |             |
|------------------------------------------------------------|-------------|-------------|-------------|------------------------------------------------------------|-------------|-------------|-------------|
| Zero-point correction= 0.422193 (Hartree/Particle)         | H           | 1.40130400  | 2.43315500  | 2.59585100                                                 |             |             |             |
| Thermal correction to Energy= 0.448298                     | H           | 2.85617500  | 1.56400300  | 3.08348200                                                 |             |             |             |
| Thermal correction to Enthalpy= 0.449242                   | H           | 5.88790100  | 2.09161800  | -0.17661900                                                |             |             |             |
| Thermal correction to Gibbs Free Energy= 0.363917          | H           | 4.98663400  | 1.89584400  | 1.42155300                                                 |             |             |             |
| Sum of electronic and zero-point Energies= -1530.520037    | H           | 4.10427600  | 1.63122200  | -2.42108300                                                |             |             |             |
| Sum of electronic and thermal Energies= -1530.493933       | H           | 4.93468600  | 0.10996600  | -2.03253500                                                |             |             |             |
| Sum of electronic and thermal Enthalpies= -1530.492989     | C           | 2.84605500  | 0.04961700  | -2.07227200                                                |             |             |             |
| Sum of electronic and thermal Free Energies= -1530.578313  | H           | 1.84157178  | 0.33555727  | -2.30497700                                                |             |             |             |
| HF(B3LYP/6-311+G(d,p)/Lanl2dz, SMD[toluene])= -1530.937286 | C           | 3.53115862  | -0.49560021 | -3.33914659                                                |             |             |             |
| N                                                          | 0.32863300  | -0.80370400 | 0.43714000  | O                                                          | 4.57078952  | -1.21716837 | -2.99752747 |
| C                                                          | 0.81615700  | -0.56097200 | -0.92648800 | O                                                          | 3.95723993  | 0.59646123  | -4.15814387 |
| H                                                          | 0.48423900  | -1.38046500 | -1.56534600 | C                                                          | 5.38624618  | 0.63910416  | -4.19012417 |
| H                                                          | 0.44869000  | 0.39168700  | -1.33563300 | H                                                          | 5.76354998  | -0.30152332 | -4.53328852 |
| C                                                          | 2.34470300  | -0.51284900 | -0.84632200 | H                                                          | 5.70514200  | 1.41504692  | -4.85429153 |
| C                                                          | 0.62165400  | 0.24627500  | 1.41975100  | H                                                          | 5.75930251  | 0.83569654  | -3.20672170 |
| H                                                          | 0.54278900  | -0.19692200 | 2.41805600  |                                                            |             |             |             |
| H                                                          | -0.12749100 | 1.05937900  | 1.37301200  | <b>3a-Me</b>                                               |             |             |             |
| C                                                          | 1.98504400  | 0.87416700  | 1.22414200  | Zero-point correction= 0.417377 (Hartree/Particle)         |             |             |             |
| C                                                          | 2.77580400  | 0.50413000  | 0.20058700  | Thermal correction to Energy= 0.445828                     |             |             |             |
| C                                                          | 4.03297800  | 1.07980400  | -0.29887400 | Thermal correction to Enthalpy= 0.446772                   |             |             |             |
| C                                                          | 5.00860800  | 1.72882000  | 0.35076900  | Thermal correction to Gibbs Free Energy= 0.353818          |             |             |             |
| C                                                          | 4.06525800  | 0.73824700  | -1.78645700 | Sum of electronic and zero-point Energies= -1530.434148    |             |             |             |
| S                                                          | -1.12825100 | -1.63097600 | 0.63113400  | Sum of electronic and thermal Energies= -1530.405697       |             |             |             |
| O                                                          | -1.11083800 | -2.72705600 | -0.33919200 | Sum of electronic and thermal Enthalpies= -1530.404753     |             |             |             |
| O                                                          | -1.26546600 | -1.86433100 | 2.07084400  | Sum of electronic and thermal Free Energies= -1530.497707  |             |             |             |
| C                                                          | -2.43532700 | -0.49886800 | 0.14319100  | HF(B3LYP/6-311+G(d,p)/Lanl2dz, SMD[toluene])= -1530.497707 |             |             |             |
| C                                                          | -3.04088600 | 0.31401300  | 1.10403400  | N                                                          | 0.55046200  | 0.31040200  | -0.70547500 |
| C                                                          | -2.81997300 | -0.42403600 | -1.19874900 | C                                                          | -0.06171700 | -0.99095400 | -0.39554600 |
| C                                                          | -4.02964100 | 1.21461200  | 0.70959900  | H                                                          | 0.49151100  | -1.75132600 | -0.95561600 |
| H                                                          | -2.76078200 | 0.21522700  | 2.14736500  | H                                                          | 0.04488200  | -1.21087700 | 0.67620800  |
| C                                                          | -3.80890300 | 0.48172600  | -1.57384000 | C                                                          | -1.51815000 | -1.09790700 | -0.81512600 |
| H                                                          | -2.36984500 | -1.08855800 | -1.92855300 | C                                                          | 0.27218300  | 1.42006700  | 0.23449600  |
| C                                                          | -4.42409500 | 1.31906100  | -0.63092600 | H                                                          | 1.14246500  | 2.08301500  | 0.24038500  |
| H                                                          | -4.50997400 | 1.83935900  | 1.45867700  | H                                                          | 0.15302900  | 1.00786400  | 1.24346600  |
| H                                                          | -4.11657700 | 0.53236300  | -2.61554200 | C                                                          | -0.95468300 | 2.23363800  | -0.14911300 |
| C                                                          | -5.47720600 | 2.31442700  | -1.05571500 | C                                                          | -2.03137400 | 2.19661600  | 0.60610100  |
| H                                                          | -6.11519600 | 2.60667700  | -0.21583100 | C                                                          | -3.08624800 | 2.14150300  | 1.34797300  |
| H                                                          | -5.01688500 | 3.22904500  | -1.45240700 | C                                                          | -4.39017800 | 1.50299300  | 1.64431200  |
| H                                                          | -6.11819000 | 1.90700000  | -1.84481500 | C                                                          | -3.86526300 | 2.65463500  | 2.49844000  |
| C                                                          | 2.94701700  | -1.90623800 | -0.61698900 | H                                                          | -4.38624800 | 0.49810100  | 2.06284100  |
| H                                                          | 4.02998000  | -1.84311900 | -0.46581600 | H                                                          | -5.22086500 | 1.70306200  | 0.96921700  |
| H                                                          | 2.50349300  | -2.37974000 | 0.26319800  | H                                                          | -4.34695600 | 3.62661200  | 2.40300500  |
| H                                                          | 2.75571100  | -2.53713500 | -1.49183100 | H                                                          | -3.51009600 | 2.43009900  | 3.50318300  |
| C                                                          | 2.31424500  | 1.96073100  | 2.21387100  | S                                                          | 2.03703600  | 0.30677500  | -1.51002000 |
| H                                                          | 2.94002200  | 2.73680700  | 1.76214500  | O                                                          | 1.96463500  | -0.78090400 | -2.49072500 |

|                                                            |             |             |             |    |             |             |             |
|------------------------------------------------------------|-------------|-------------|-------------|----|-------------|-------------|-------------|
| O                                                          | 2.28475200  | 1.69583400  | -1.90485500 | H  | 7.86352800  | 1.55858400  | -1.26140000 |
| C                                                          | 3.30082800  | -0.13797000 | -0.31055200 | H  | 6.66377500  | 0.26124700  | -1.44713500 |
| C                                                          | 3.96714600  | 0.86554800  | 0.39672300  | C  | 5.91132900  | 2.13329500  | -0.66789100 |
| C                                                          | 3.59620400  | -1.48490000 | -0.08313900 | C  | 6.58820100  | -0.48920800 | 1.12760700  |
| C                                                          | 4.91963300  | 0.51011600  | 1.35004400  | H  | 7.23197400  | -1.17262100 | 1.68929400  |
| H                                                          | 3.76308200  | 1.90793200  | 0.17692300  | H  | 6.08939900  | -1.06505900 | 0.33907600  |
| C                                                          | 4.55104400  | -1.82102900 | 0.87375500  | C  | 5.55741000  | 0.09622800  | 2.08234300  |
| H                                                          | 3.10799600  | -2.25414100 | -0.67193800 | C  | 4.27630400  | 0.02251900  | 1.79333600  |
| C                                                          | 5.22119200  | -0.83374700 | 1.61080400  | C  | 3.02191400  | -0.04600800 | 1.49444100  |
| H                                                          | 5.44612200  | 1.29153800  | 1.89257900  | C  | 1.86607000  | 0.60532800  | 0.84711400  |
| H                                                          | 4.78895600  | -2.86849100 | 1.04257800  | C  | 1.76149300  | -0.80766800 | 1.55317400  |
| C                                                          | 6.23434900  | -1.21049100 | 2.66511900  | H  | 1.86435700  | 0.65777200  | -0.24099800 |
| H                                                          | 6.98054800  | -0.42176500 | 2.80435000  | H  | 1.43290300  | 1.46749700  | 1.35229800  |
| H                                                          | 5.74855100  | -1.37561200 | 3.63605100  | H  | 1.24984500  | -0.86891200 | 2.51228900  |
| H                                                          | 6.75989000  | -2.13485900 | 2.40400500  | H  | 1.67885400  | -1.69780300 | 0.93062100  |
| C                                                          | -1.80930500 | -0.77840000 | -2.25314200 | S  | 9.11445300  | 0.44824600  | 0.77306600  |
| H                                                          | -1.76033200 | 0.30673400  | -2.40389700 | O  | 9.68668500  | 1.66799100  | 0.19534500  |
| H                                                          | -1.03791900 | -1.21288900 | -2.90023400 | O  | 9.27210400  | 0.10876800  | 2.18960400  |
| H                                                          | -2.79670900 | -1.12701800 | -2.55078900 | C  | 9.73714800  | -0.94191100 | -0.18047000 |
| C                                                          | -0.84421400 | 3.09048800  | -1.39105400 | C  | 9.82179300  | -2.20464200 | 0.41171800  |
| H                                                          | -0.07811000 | 3.86636300  | -1.25963400 | C  | 10.11828200 | -0.75303500 | -1.51211700 |
| H                                                          | -0.53022600 | 2.48849900  | -2.25123100 | C  | 10.27231800 | -3.28428000 | -0.34635100 |
| H                                                          | -1.79477900 | 3.57655800  | -1.62469900 | H  | 9.56921900  | -2.32825500 | 1.45928700  |
| C                                                          | -2.40968800 | -1.52278400 | 0.10181800  | C  | 10.56589400 | -1.84400200 | -2.25415000 |
| C                                                          | -2.11808225 | -1.90965673 | 1.49611472  | H  | 10.09512300 | 0.24022400  | -1.94753700 |
| O                                                          | -1.05357876 | -1.87426475 | 2.08474813  | C  | 10.64240200 | -3.12586900 | -1.68938300 |
| O                                                          | -3.26492456 | -2.34087370 | 2.09689663  | H  | 10.34848000 | -4.26471800 | 0.11736500  |
| C                                                          | -3.12377431 | -2.72177641 | 3.47221389  | H  | 10.87280700 | -1.69518500 | -3.28655900 |
| H                                                          | -4.11916473 | -3.02942096 | 3.79517632  | C  | 11.10261000 | -4.30633700 | -2.51122600 |
| H                                                          | -2.41426085 | -3.54752737 | 3.57538130  | H  | 11.55277500 | -5.08151900 | -1.88282800 |
| H                                                          | -2.76977563 | -1.87847034 | 4.07177410  | H  | 10.25989400 | -4.76644600 | -3.04436500 |
| H                                                          | -3.45721715 | -1.60766018 | -0.17399488 | H  | 11.83897500 | -4.00771000 | -3.26462000 |
|                                                            |             |             |             | C  | 6.23652900  | 3.30622300  | 0.21186500  |
| <b>4-Int1</b>                                              |             |             |             | H  | 6.24497200  | 2.98751000  | 1.26096000  |
| Zero-point correction= 1.092642 (Hartree/Particle)         |             |             |             | H  | 7.24896200  | 3.66942500  | -0.00478100 |
| Thermal correction to Energy= 1.160550                     |             |             |             | H  | 5.51370800  | 4.11128400  | 0.09235000  |
| Thermal correction to Enthalpy= 1.161494                   |             |             |             | C  | 6.08151300  | 0.70636600  | 3.36380900  |
| Thermal correction to Gibbs Free Energy=0.976982           |             |             |             | H  | 6.57411900  | -0.05616100 | 3.98176000  |
| Sum of electronic and zero-point Energies= -3130.032839    |             |             |             | H  | 6.84001400  | 1.46734200  | 3.14856200  |
| Sum of electronic and thermal Energies= -3129.964932       |             |             |             | H  | 5.27626100  | 1.16062400  | 3.94670300  |
| Sum of electronic and thermal Enthalpies= -3129.963988     |             |             |             | Pd | -0.50560700 | -0.22222700 | 0.52359200  |
| Sum of electronic and thermal Free Energies= -3130.148500  |             |             |             | P  | -2.71193200 | -0.42458500 | -0.12648300 |
| HF(B3LYP/6-311+G(d,p)/Lanl2dz, SMD[toluene])= -3129.159880 |             |             |             | C  | -3.12672300 | -2.30248800 | -0.27271600 |
| N                                                          | 7.44804800  | 0.53864500  | 0.50003000  | C  | -2.93580100 | 0.48794300  | -1.81055400 |
| C                                                          | 6.99852100  | 1.07898000  | -0.79294100 | C  | -2.80898900 | 1.99108700  | -1.48231900 |

|   |              |             |             |                                              |                             |             |             |
|---|--------------|-------------|-------------|----------------------------------------------|-----------------------------|-------------|-------------|
| H | -3.62281100  | 2.35185200  | -0.84947900 | H                                            | -9.33909700                 | -3.07646100 | -2.26396300 |
| H | -1.86462100  | 2.19863200  | -0.96676200 | H                                            | -10.34954800                | -2.43082800 | -3.56768400 |
| H | -2.82582200  | 2.56958500  | -2.41566100 | C                                            | -11.15063000                | -1.18407600 | -1.22467400 |
| C | -1.73956200  | 0.11563000  | -2.71499300 | H                                            | -11.41104500                | -0.29592800 | -0.63846400 |
| H | -1.75628600  | 0.75830700  | -3.60648000 | H                                            | -11.98857500                | -1.40876400 | -1.89550800 |
| H | -0.78576200  | 0.25791700  | -2.19464200 | H                                            | -11.04815600                | -2.02541200 | -0.52895800 |
| H | -1.78611500  | -0.92066900 | -3.06207700 | C                                            | -6.82186300                 | -1.95531700 | 1.89672400  |
| C | -4.22906700  | 0.21775600  | -2.59663600 | H                                            | -5.80928000                 | -1.72374000 | 2.23858000  |
| H | -4.29841500  | 0.93035600  | -3.43016800 | C                                            | -7.78253800                 | -1.61701000 | 3.05947300  |
| H | -4.23059100  | -0.78185100 | -3.03773800 | H                                            | -8.82251800                 | -1.81070500 | 2.77045900  |
| H | -5.13005300  | 0.31890900  | -1.99098800 | H                                            | -7.55381900                 | -2.23606800 | 3.93564900  |
| C | -1.95441900  | -2.99318300 | -1.00487400 | H                                            | -7.70701300                 | -0.56839100 | 3.35990100  |
| H | -2.08684700  | -4.08185700 | -0.93746100 | C                                            | -6.89106800                 | -3.46865100 | 1.61865300  |
| H | -1.91711800  | -2.73536200 | -2.06738600 | H                                            | -6.27678600                 | -3.76272300 | 0.76463400  |
| H | -0.99134100  | -2.72825200 | -0.55465400 | H                                            | -6.53711100                 | -4.02099400 | 2.49693200  |
| C | -4.42965700  | -2.68536300 | -0.99324500 | H                                            | -7.91805500                 | -3.80018200 | 1.42581300  |
| H | -4.35528600  | -2.52653900 | -2.07170900 | C                                            | -6.51425600                 | 2.53157700  | -0.57442300 |
| H | -4.62044800  | -3.75719700 | -0.84465600 | H                                            | -5.51650800                 | 2.59429100  | -0.13117000 |
| H | -5.29910500  | -2.13531800 | -0.63234900 | C                                            | -6.43296800                 | 3.10082600  | -2.00330200 |
| C | -3.13626000  | -2.83421500 | 1.17670800  | H                                            | -7.42643500                 | 3.21556700  | -2.45219900 |
| H | -2.18889900  | -2.61066700 | 1.67987500  | H                                            | -5.97718300                 | 4.09750900  | -1.97731000 |
| H | -3.94378200  | -2.40563500 | 1.77454900  | H                                            | -5.83471500                 | 2.47295200  | -2.66742200 |
| H | -3.26784000  | -3.92425500 | 1.16276500  | C                                            | -7.44377800                 | 3.43295700  | 0.26993700  |
| C | -3.87678600  | 0.38089900  | 1.18840800  | H                                            | -7.10223900                 | 4.47464300  | 0.23217200  |
| C | -5.29068300  | 0.57046600  | 1.34773100  | H                                            | -8.46985100                 | 3.39917400  | -0.11556700 |
| C | -3.05760500  | 0.89144300  | 2.22302400  | H                                            | -7.46864000                 | 3.12507300  | 1.31885400  |
| C | -5.74701000  | 1.24123400  | 2.50241300  | C                                            | 4.78472800                  | 1.96787400  | -1.38886400 |
| C | -3.53782300  | 1.54920700  | 3.35240400  | C                                            | 4.44467925                  | 0.80566993  | -2.23540286 |
| H | -1.98183900  | 0.75684500  | 2.12064800  | O                                            | 5.06980392                  | -0.22790539 | -2.38643360 |
| C | -4.90649600  | 1.72937200  | 3.49728800  | O                                            | 3.26441703                  | 1.04089571  | -2.87484035 |
| H | -6.81815200  | 1.37887200  | 2.61037800  | C                                            | 2.80704749                  | -0.02129706 | -3.72399641 |
| H | -2.84002600  | 1.91238100  | 4.10226800  | H                                            | 1.86469964                  | 0.32733875  | -4.14733039 |
| H | -5.32252800  | 2.23808500  | 4.36304900  | H                                            | 3.53132534                  | -0.21989652 | -4.51876100 |
| C | -6.43809300  | 0.15471500  | 0.44697000  | H                                            | 2.65594651                  | -0.93744721 | -3.14611925 |
| C | -6.98140800  | 1.07439900  | -0.48882600 | H                                            | 4.02952915                  | 2.74914441  | -1.38251509 |
| C | -7.13018100  | -1.06471300 | 0.68766500  |                                              |                             |             |             |
| C | -8.07315300  | 0.68076300  | -1.27494300 |                                              |                             |             |             |
| C | -8.21784300  | -1.40427000 | -0.12533500 |                                              |                             |             |             |
| C | -8.68801000  | -0.56313300 | -1.13695100 |                                              |                             |             |             |
| H | -8.47177300  | 1.37658800  | -2.00862900 |                                              |                             |             |             |
| H | -8.72587700  | -2.34778700 | 0.05214700  |                                              |                             |             |             |
| C | -9.85616400  | -0.96061100 | -2.02971600 |                                              |                             |             |             |
| H | -10.03715200 | -0.12127400 | -2.71525200 |                                              |                             |             |             |
| C | -9.52070700  | -2.19432900 | -2.88953800 |                                              |                             |             |             |
| H | -8.62286000  | -2.02357200 | -3.49359500 |                                              |                             |             |             |
|   |              |             |             | <b>4-Ts1</b>                                 |                             |             |             |
|   |              |             |             | Zero-point correction=                       | 1.090868 (Hartree/Particle) |             |             |
|   |              |             |             | Thermal correction to Energy=                | 1.157969                    |             |             |
|   |              |             |             | Thermal correction to Enthalpy=              | 1.158913                    |             |             |
|   |              |             |             | Thermal correction to Gibbs Free Energy=     | 0.976857                    |             |             |
|   |              |             |             | Sum of electronic and zero-point Energies=   | -3130.028108                |             |             |
|   |              |             |             | Sum of electronic and thermal Energies=      | -3129.961007                |             |             |
|   |              |             |             | Sum of electronic and thermal Enthalpies=    | -3129.960062                |             |             |
|   |              |             |             | Sum of electronic and thermal Free Energies= | -3130.142118                |             |             |

| HF(B3LYP/6-311+G(d,p)/LanL2dz, SMD[toluene])= -3129.150866 |             |             |             | P | -2.67023800 | 0.08523100  | 0.19916400  |
|------------------------------------------------------------|-------------|-------------|-------------|---|-------------|-------------|-------------|
| Imaginary frequency is -209.71 <sup>-1</sup>               |             |             |             | C | -2.97475400 | 1.92960800  | -0.25939400 |
| N                                                          | 7.15586300  | -0.91968200 | -0.10796800 | C | -2.95324600 | -0.24552900 | 2.07540600  |
| C                                                          | 6.80183900  | -0.55657600 | 1.27855000  | C | -2.98352900 | -1.78037800 | 2.23906300  |
| H                                                          | 7.70382500  | -0.66750900 | 1.88896800  | H | -3.84144800 | -2.23979100 | 1.74341700  |
| H                                                          | 6.47280300  | 0.48273300  | 1.33227400  | H | -2.07511000 | -2.23822100 | 1.83173900  |
| C                                                          | 5.75784100  | -1.48431300 | 1.87101700  | H | -3.03738800 | -2.02783800 | 3.30738800  |
| C                                                          | 6.24498700  | -0.42752900 | -1.16747400 | C | -1.71822200 | 0.26680300  | 2.85046500  |
| H                                                          | 6.84326800  | -0.19581800 | -2.05405400 | H | -1.80779000 | -0.04103100 | 3.90148200  |
| H                                                          | 5.77609700  | 0.50012600  | -0.82217800 | H | -0.79048100 | -0.14830700 | 2.44273500  |
| C                                                          | 5.17812400  | -1.44332200 | -1.55528700 | H | -1.63851800 | 1.35730900  | 2.83401100  |
| C                                                          | 3.91323300  | -1.21577100 | -1.27642800 | C | -4.20938000 | 0.38783600  | 2.69452200  |
| C                                                          | 2.66543100  | -0.98917500 | -1.00143700 | H | -4.37131000 | -0.03175100 | 3.69673600  |
| C                                                          | 1.65857900  | -1.23436000 | 0.04844900  | H | -4.09168700 | 1.46797900  | 2.81853500  |
| C                                                          | 1.46637700  | -0.33777500 | -1.56018800 | H | -5.11067800 | 0.21442100  | 2.10408000  |
| H                                                          | 1.79083400  | -0.69443900 | 0.98696700  | C | -1.83238400 | 2.76270700  | 0.36487100  |
| H                                                          | 1.30310100  | -2.26222800 | 0.14123900  | H | -1.85371500 | 3.77155000  | -0.06922800 |
| H                                                          | 0.99855400  | -0.83066500 | -2.41403700 | H | -1.94703800 | 2.87426900  | 1.44741800  |
| H                                                          | 1.48010200  | 0.75297700  | -1.59575400 | H | -0.85099200 | 2.31871800  | 0.16331900  |
| S                                                          | 8.79263400  | -1.08163500 | -0.47925400 | C | -4.30984700 | 2.57067600  | 0.15162400  |
| O                                                          | 9.40627400  | -1.74982500 | 0.67348700  | H | -4.38169200 | 2.70367500  | 1.23335700  |
| O                                                          | 8.84823400  | -1.65401800 | -1.82763100 | H | -4.37818500 | 3.57148500  | -0.29743000 |
| C                                                          | 9.49072600  | 0.57142200  | -0.57668500 | H | -5.17762200 | 1.99879600  | -0.17326400 |
| C                                                          | 9.54471200  | 1.22695900  | -1.80927300 | C | -2.80196300 | 1.98748100  | -1.79342700 |
| C                                                          | 9.95689200  | 1.19708200  | 0.58327900  | H | -1.81606100 | 1.61258100  | -2.08946400 |
| C                                                          | 10.05141500 | 2.52430100  | -1.86999600 | H | -3.55720700 | 1.39986700  | -2.32098700 |
| H                                                          | 9.22320800  | 0.71297900  | -2.70863900 | H | -2.88821300 | 3.02889100  | -2.13033600 |
| C                                                          | 10.45916400 | 2.49391800  | 0.50327200  | C | -3.84326000 | -1.07863100 | -0.78667100 |
| H                                                          | 9.95297700  | 0.66307500  | 1.52734600  | C | -5.25833000 | -1.19574500 | -0.99369300 |
| C                                                          | 10.50699800 | 3.18144100  | -0.71861400 | C | -3.03217600 | -2.04396400 | -1.42960000 |
| H                                                          | 10.10266900 | 3.03090100  | -2.83066600 | C | -5.72466000 | -2.24347800 | -1.81589800 |
| H                                                          | 10.82951600 | 2.97732200  | 1.40401600  | C | -3.52403500 | -3.07444400 | -2.22645800 |
| C                                                          | 11.02570800 | 4.59810400  | -0.78773100 | H | -1.95509900 | -1.96846900 | -1.29218500 |
| H                                                          | 11.41681500 | 4.83421600  | -1.78259600 | C | -4.89367000 | -3.17662400 | -2.42733400 |
| H                                                          | 10.22688600 | 5.31963800  | -0.57023600 | H | -6.79576200 | -2.31443000 | -1.97614300 |
| H                                                          | 11.82415800 | 4.76886600  | -0.05791800 | H | -2.83392700 | -3.77816700 | -2.68423800 |
| C                                                          | 6.06213500  | -2.95479400 | 1.77534200  | H | -5.31780600 | -3.96116000 | -3.04859800 |
| H                                                          | 6.00918700  | -3.28732100 | 0.73293900  | C | -6.39640200 | -0.33602200 | -0.47714100 |
| H                                                          | 7.08600800  | -3.16022500 | 2.11150600  | C | -7.10400400 | -0.70193300 | 0.69885000  |
| H                                                          | 5.36205800  | -3.55132000 | 2.36704100  | C | -6.91483500 | 0.70952100  | -1.29045100 |
| C                                                          | 5.64723000  | -2.67490600 | -2.30033300 | C | -8.18920600 | 0.08389300  | 1.11116100  |
| H                                                          | 6.08057900  | -2.39766400 | -3.27053300 | C | -8.01061300 | 1.45140600  | -0.83476600 |
| H                                                          | 6.44105900  | -3.18691700 | -1.74496000 | C | -8.64557700 | 1.17951400  | 0.37921300  |
| H                                                          | 4.82367500  | -3.37264000 | -2.47340400 | H | -8.71351600 | -0.18070200 | 2.02539200  |
| Pd                                                         | -0.37296600 | -0.41040700 | -0.31359400 | H | -8.38734300 | 2.25896900  | -1.45594600 |

|                                          |              |                    |             |                                               |              |             |             |
|------------------------------------------|--------------|--------------------|-------------|-----------------------------------------------|--------------|-------------|-------------|
| C                                        | -9.81867700  | 2.01546600         | 0.87376100  | Sum of electronic and zero-point Energies=    | -3130.041059 |             |             |
| H                                        | -10.14144400 | 1.58246400         | 1.83059300  | Sum of electronic and thermal Energies=       | -3129.961007 |             |             |
| C                                        | -9.40431800  | 3.47458700         | 1.14429900  | Sum of electronic and thermal Enthalpies=     | -3129.973979 |             |             |
| H                                        | -8.57516000  | 3.52482300         | 1.85854900  | Sum of electronic and thermal Free Energies=  | -3129.973035 |             |             |
| H                                        | -9.08123100  | 3.97300200         | 0.22252400  | HF(B3LYP/6-311+G(d,p)/Lanl2dz, SMD[toluene])= | -3129.152845 |             |             |
| H                                        | -10.24523700 | 4.04598900         | 1.55549800  | N                                             | -6.83494900  | 0.04861500  | -0.65339500 |
| C                                        | -11.02026600 | 1.95208500         | -0.08847300 | C                                             | -6.76150800  | 1.32921200  | 0.06700200  |
| H                                        | -11.34017800 | 0.91767300         | -0.25550000 | H                                             | -7.71084200  | 1.84843100  | -0.09864300 |
| H                                        | -11.87099900 | 2.51154200         | 0.31880100  | H                                             | -6.65264000  | 1.14974200  | 1.14621700  |
| H                                        | -10.77380500 | 2.38728700         | -1.06430100 | C                                             | -5.65830000  | 2.24861400  | -0.42830200 |
| C                                        | -6.39228100  | 0.98523200         | -2.70461800 | C                                             | -5.85200200  | -0.99352500 | -0.26642800 |
| H                                        | -5.40144300  | 0.53055700         | -2.79418200 | H                                             | -6.32370200  | -1.96882100 | -0.42059500 |
| C                                        | -7.30112900  | 0.30344300         | -3.75177400 | H                                             | -5.62731900  | -0.88729300 | 0.80144800  |
| H                                        | -8.32091100  | 0.70330500         | -3.69921100 | C                                             | -4.56605600  | -0.93391800 | -1.07909200 |
| H                                        | -6.91909800  | 0.48328400         | -4.76411900 | C                                             | -3.42713300  | -0.61753900 | -0.50162200 |
| H                                        | -7.35632700  | -0.77831800        | -3.60034300 | C                                             | -2.26895100  | -0.29888300 | 0.02620400  |
| C                                        | -6.25666800  | 2.48014300         | -3.05183300 | C                                             | -1.52458300  | 1.00872900  | 0.00260300  |
| H                                        | -5.67206400  | 3.02638400         | -2.30734300 | C                                             | -1.17577900  | -1.19426200 | 0.51728800  |
| H                                        | -5.75818000  | 2.59080400         | -4.02191100 | H                                             | -1.54569500  | 1.54741200  | 0.95704300  |
| H                                        | -7.23438400  | 2.96841600         | -3.13698600 | H                                             | -1.73492500  | 1.66530900  | -0.84618800 |
| C                                        | -6.82262800  | -2.00338500        | 1.45788800  | H                                             | -1.08267600  | -2.18111100 | 0.05971900  |
| H                                        | -5.78943700  | -2.29761000        | 1.25393800  | H                                             | -1.06009200  | -1.21946700 | 1.60586000  |
| C                                        | -6.99619700  | -1.90958300        | 2.98612800  | S                                             | -8.35534600  | -0.45498700 | -1.18349900 |
| H                                        | -8.05145900  | -1.81744800        | 3.26842200  | O                                             | -9.04192700  | 0.74861900  | -1.66533900 |
| H                                        | -6.62000000  | -2.82583500        | 3.45573900  | O                                             | -8.12461400  | -1.61442500 | -2.04912900 |
| H                                        | -6.45821700  | -1.06263300        | 3.41814000  | C                                             | -9.26012200  | -1.04170200 | 0.25601900  |
| C                                        | -7.73287900  | -3.13600500        | 0.92980600  | C                                             | -9.19553100  | -2.39144300 | 0.61132100  |
| H                                        | -7.53083400  | -4.06916700        | 1.46986600  | C                                             | -10.00023800 | -0.13899500 | 1.02485200  |
| H                                        | -8.78918200  | -2.88139600        | 1.07810300  | C                                             | -9.86444300  | -2.82935500 | 1.75325500  |
| H                                        | -7.57712400  | -3.32449100        | -0.13531600 | H                                             | -8.64855200  | -3.08872700 | -0.01399500 |
| C                                        | 4.64377200   | -1.05408500        | 2.49778000  | C                                             | -10.66235500 | -0.59455700 | 2.16315000  |
| C                                        | 4.19086900   | 0.34400500         | 2.64235800  | H                                             | -10.07478900 | 0.89911300  | 0.71914600  |
| O                                        | 4.79374100   | 1.36888500         | 2.37058100  | C                                             | -10.60481200 | -1.94229900 | 2.54732800  |
| O                                        | 2.92820800   | 0.36294100         | 3.14943600  | H                                             | -9.81634300  | -3.88035700 | 2.02794200  |
| C                                        | 2.36478700   | 1.66770000         | 3.34569000  | H                                             | -11.24064200 | 0.10733400  | 2.75931100  |
| H                                        | 1.36740400   | 1.49662300         | 3.75151200  | C                                             | -11.35370600 | -2.43191400 | 3.76425600  |
| H                                        | 2.97290600   | 2.24743600         | 4.04585500  | H                                             | -12.38291900 | -2.71421800 | 3.50536700  |
| H                                        | 2.30382200   | 2.20845800         | 2.39737500  | H                                             | -10.87472200 | -3.31372700 | 4.20215900  |
| H                                        | 3.96483700   | -1.78757700        | 2.92299700  | H                                             | -11.41412800 | -1.65775500 | 4.53643500  |
|                                          |              |                    |             | C                                             | -5.63676600  | 2.51122100  | -1.90728900 |
| <b>4-Int2</b>                            |              |                    |             | H                                             | -5.14394300  | 1.67578000  | -2.41902000 |
| Zero-point correction=                   | 1.092332     | (Hartree/Particle) |             | H                                             | -6.65924300  | 2.55903800  | -2.29944800 |
| Thermal correction to Energy=            | 1.159412     |                    |             | H                                             | -5.08938200  | 3.42231600  | -2.14500400 |
| Thermal correction to Enthalpy=          | 1.160356     |                    |             | C                                             | -4.68783700  | -1.30177200 | -2.54503500 |
| Thermal correction to Gibbs Free Energy= | 0.979856     |                    |             | H                                             | -5.00335000  | -2.34799400 | -2.65990600 |



|    |             |             |             |                        |                             |             |             |
|----|-------------|-------------|-------------|------------------------|-----------------------------|-------------|-------------|
| H  | -5.45326300 | -0.69376600 | -3.04134000 | C                      | 8.38057900                  | -0.51369500 | 1.36546600  |
| H  | -3.73544800 | -1.16707400 | -3.06499000 | H                      | 7.72254600                  | 0.62510900  | 3.04909200  |
| Pd | 0.33284500  | 0.07594100  | -0.14303300 | H                      | 8.79778100                  | -1.45785700 | -0.51224000 |
| P  | 2.60148300  | -0.95022900 | -0.37879300 | C                      | 9.60321700                  | -1.07542900 | 2.07914400  |
| C  | 2.75092000  | -2.13440900 | -1.90389100 | H                      | 9.59158900                  | -0.67354900 | 3.10159700  |
| C  | 3.13872500  | -1.82263900 | 1.24099800  | C                      | 9.54561500                  | -2.61132200 | 2.18671500  |
| C  | 2.80945900  | -0.80766100 | 2.35641800  | H                      | 8.62946000                  | -2.93905900 | 2.69015500  |
| H  | 3.38261400  | 0.11557800  | 2.25105000  | H                      | 9.56823500                  | -3.08039600 | 1.19578200  |
| H  | 1.74670100  | -0.54433600 | 2.35455400  | H                      | 10.40296300                 | -2.99157400 | 2.75492100  |
| H  | 3.05570900  | -1.24780100 | 3.33191900  | C                      | 10.91763400                 | -0.61662000 | 1.41913100  |
| C  | 2.19880100  | -3.03761100 | 1.42245800  | H                      | 10.97789300                 | 0.47630000  | 1.37311100  |
| H  | 2.31896100  | -3.41890200 | 2.44495700  | H                      | 11.78214700                 | -0.98300400 | 1.98551900  |
| H  | 1.14645200  | -2.77093800 | 1.28691800  | H                      | 11.00517100                 | -0.99960900 | 0.39538700  |
| H  | 2.44268900  | -3.85879500 | 0.74176600  | C                      | 6.84105100                  | -0.59857300 | -2.13811200 |
| C  | 4.59170200  | -2.30463900 | 1.39492900  | H                      | 5.77569800                  | -0.55840300 | -2.38727600 |
| H  | 4.69129500  | -2.79653300 | 2.37263800  | C                      | 7.54601800                  | 0.49789800  | -2.96788500 |
| H  | 4.87464600  | -3.03566700 | 0.63536700  | H                      | 8.61518000                  | 0.53353300  | -2.72665800 |
| H  | 5.30755700  | -1.48538000 | 1.36404700  | H                      | 7.44775300                  | 0.28770900  | -4.03998000 |
| C  | 1.43009500  | -2.93284300 | -1.98891400 | H                      | 7.12286200                  | 1.48795600  | -2.77973800 |
| H  | 1.46153900  | -3.58072300 | -2.87531900 | C                      | 7.37708300                  | -1.97508300 | -2.57778800 |
| H  | 1.26868500  | -3.57487200 | -1.11892300 | H                      | 7.02690200                  | -2.78701400 | -1.93279100 |
| H  | 0.56777000  | -2.26566600 | -2.07951100 | H                      | 7.05347500                  | -2.19040000 | -3.60238800 |
| C  | 3.93074500  | -3.11839400 | -1.85209800 | H                      | 8.47293000                  | -1.99984600 | -2.57707600 |
| H  | 3.81145700  | -3.86133000 | -1.05843400 | C                      | 5.51985700                  | 1.88900800  | 2.18905000  |
| H  | 3.98690800  | -3.66756700 | -2.80197300 | H                      | 4.52965100                  | 1.94370600  | 1.72426000  |
| H  | 4.88569400  | -2.61200200 | -1.70538000 | C                      | 5.32370600                  | 1.51741100  | 3.67318400  |
| C  | 2.85722000  | -1.28655600 | -3.18753000 | H                      | 6.24620700                  | 1.65261700  | 4.24939800  |
| H  | 2.01856800  | -0.59077900 | -3.28994600 | H                      | 4.56685900                  | 2.17073800  | 4.12238500  |
| H  | 3.78429900  | -0.70896600 | -3.23745900 | H                      | 4.99803400                  | 0.48160500  | 3.80255500  |
| H  | 2.83321100  | -1.95996100 | -4.05406900 | C                      | 6.14372200                  | 3.30003800  | 2.10682300  |
| C  | 3.56027800  | 0.63669700  | -0.81394200 | H                      | 5.53887700                  | 4.01759800  | 2.67442400  |
| C  | 4.88838700  | 1.13149600  | -0.63974600 | H                      | 7.15478600                  | 3.30027500  | 2.53153800  |
| C  | 2.64530600  | 1.49841200  | -1.47172500 | H                      | 6.21123800                  | 3.65925800  | 1.07648900  |
| C  | 5.19427400  | 2.41039300  | -1.15395400 | C                      | -4.83998000                 | 2.80298600  | 0.48785700  |
| C  | 2.97168600  | 2.75759500  | -1.96444000 | C                      | -4.85672943                 | 2.54873114  | 1.94081358  |
| H  | 1.62143500  | 1.15634900  | -1.64607100 | O                      | -5.61438397                 | 1.83357500  | 2.57301234  |
| C  | 4.27264000  | 3.22100400  | -1.80777400 | O                      | -3.85759497                 | 3.25523677  | 2.53889548  |
| H  | 6.20919200  | 2.77186400  | -1.02149300 | C                      | -3.77230859                 | 3.10551499  | 3.96024702  |
| H  | 2.21354100  | 3.35710200  | -2.45991500 | H                      | -2.91803904                 | 3.71000460  | 4.26860160  |
| H  | 4.56991100  | 4.19795400  | -2.17879600 | H                      | -4.68698320                 | 3.46365680  | 4.44186545  |
| C  | 6.06280600  | 0.49437900  | 0.07010900  | H                      | -3.61852274                 | 2.05723302  | 4.23220938  |
| C  | 6.35904300  | 0.87372700  | 1.40591200  | H                      | -4.08501866                 | 3.51558923  | 0.16763799  |
| C  | 6.98321300  | -0.32271100 | -0.63896100 |                        |                             |             |             |
| C  | 7.50280300  | 0.34785000  | 2.02165700  | <b>4-Ts2</b>           |                             |             |             |
| C  | 8.10633500  | -0.82078400 | 0.03029500  | Zero-point correction= | 1.092643 (Hartree/Particle) |             |             |

|                                                            |             |             |             |    |             |             |             |
|------------------------------------------------------------|-------------|-------------|-------------|----|-------------|-------------|-------------|
| Thermal correction to Energy= 1.158785                     |             |             |             | H  | 4.43114200  | 1.52215700  | 2.60181000  |
| Thermal correction to Enthalpy= 1.159729                   |             |             |             | H  | 2.78195000  | 1.02031400  | 3.04515400  |
| Thermal correction to Gibbs Free Energy= 0.984759          |             |             |             | Pd | -0.12287800 | -0.46723000 | 0.11153500  |
| Sum of electronic and zero-point Energies= -3129.990161    |             |             |             | P  | -2.12263000 | 0.73778700  | -0.15688600 |
| Sum of electronic and thermal Energies= -3129.924019       |             |             |             | C  | -2.90966800 | 0.59594900  | -1.91116600 |
| Sum of electronic and thermal Enthalpies= -3129.923075     |             |             |             | C  | -2.03689100 | 2.60837600  | 0.40121000  |
| Sum of electronic and thermal Free Energies= -3130.098044  |             |             |             | C  | -1.01331000 | 2.73970700  | 1.55057400  |
| HF(B3LYP/6-311+G(d,p)/Lanl2dz, SMD[toluene])= -3129.110807 |             |             |             | H  | -1.36794600 | 2.28121500  | 2.47725300  |
| Imaginary frequency is -147.82 <sup>-1</sup>               |             |             |             | H  | -0.04469100 | 2.30035700  | 1.29122500  |
| N                                                          | 5.98450100  | 0.27307000  | 0.61204600  | H  | -0.86364000 | 3.80732200  | 1.75873900  |
| C                                                          | 5.91109800  | 1.03714700  | -0.64355100 | C  | -1.53154800 | 3.50085700  | -0.75066300 |
| H                                                          | 6.92679200  | 1.34175500  | -0.91556100 | H  | -1.38866600 | 4.51470100  | -0.35344600 |
| H                                                          | 5.52191900  | 0.39457000  | -1.44453600 | H  | -0.56759000 | 3.17346100  | -1.15189500 |
| C                                                          | 5.07194700  | 2.30011500  | -0.52512400 | H  | -2.25147300 | 3.58311100  | -1.56853400 |
| C                                                          | 4.89497700  | -0.70924200 | 0.86249600  | C  | -3.39049600 | 3.13781300  | 0.90047900  |
| H                                                          | 5.27886900  | -1.40558000 | 1.61397200  | H  | -3.27870100 | 4.19087400  | 1.19251800  |
| H                                                          | 4.69635800  | -1.27136500 | -0.06019900 | H  | -4.17089700 | 3.08996200  | 0.13792900  |
| C                                                          | 3.60373300  | -0.08868600 | 1.39442200  | H  | -3.73240400 | 2.58906100  | 1.78246900  |
| C                                                          | 2.43015000  | -0.27112600 | 0.79239500  | C  | -1.85235300 | 1.08016400  | -2.93480400 |
| C                                                          | 1.98061700  | -0.97463700 | -0.36433800 | H  | -2.23712400 | 0.86228600  | -3.93949500 |
| C                                                          | 1.62960100  | -2.34121300 | -0.42837500 | H  | -1.64719600 | 2.14853400  | -2.89002700 |
| C                                                          | 1.29957200  | -0.15207100 | -1.36818300 | H  | -0.90674500 | 0.54631600  | -2.81666700 |
| S                                                          | 7.52997400  | -0.10708200 | 1.17762800  | C  | -4.21844600 | 1.37363300  | -2.12598700 |
| O                                                          | 8.34699000  | 1.09633600  | 0.97636200  | H  | -4.08477200 | 2.45252600  | -2.00391000 |
| O                                                          | 7.35513300  | -0.70483800 | 2.50354700  | H  | -4.56672800 | 1.20604300  | -3.15406900 |
| C                                                          | 8.19799600  | -1.38194400 | 0.09875600  | H  | -5.01059700 | 1.03893900  | -1.45440600 |
| C                                                          | 7.89869700  | -2.72527300 | 0.34616900  | C  | -3.13132300 | -0.89809700 | -2.21256100 |
| C                                                          | 8.98496800  | -1.02001200 | -0.99692400 | H  | -2.21014500 | -1.47140400 | -2.06443700 |
| C                                                          | 8.38041900  | -3.70241400 | -0.52176900 | H  | -3.92256000 | -1.33206700 | -1.60481700 |
| H                                                          | 7.31521900  | -2.99873500 | 1.21864100  | H  | -3.42857800 | -1.00122800 | -3.26453800 |
| C                                                          | 9.46005000  | -2.01199000 | -1.85429700 | C  | -3.02709600 | -0.10031800 | 1.30143700  |
| H                                                          | 9.23940700  | 0.02213900  | -1.15729900 | C  | -4.32242000 | -0.65135800 | 1.54019200  |
| C                                                          | 9.16536400  | -3.36433900 | -1.63454700 | C  | -2.09199100 | -0.20173900 | 2.36477600  |
| H                                                          | 8.14855600  | -4.74709500 | -0.32820700 | C  | -4.61329500 | -1.14118700 | 2.83051400  |
| H                                                          | 10.07613300 | -1.73028000 | -2.70487500 | C  | -2.39634600 | -0.72418900 | 3.61929800  |
| C                                                          | 9.70679900  | -4.43675400 | -2.55022600 | C  | -3.68782300 | -1.17421300 | 3.86844000  |
| H                                                          | 9.96548600  | -4.03155300 | -3.53369800 | H  | -5.60874300 | -1.54068900 | 2.99953200  |
| H                                                          | 10.61581800 | -4.88950100 | -2.13239800 | H  | -1.62543700 | -0.76940400 | 4.38308900  |
| H                                                          | 8.98070100  | -5.24417700 | -2.69471000 | H  | 1.13535900  | -2.74405300 | -1.30550700 |
| C                                                          | 5.57066300  | 3.32249800  | 0.46249000  | H  | 1.89571300  | -3.02672200 | 0.36957900  |
| H                                                          | 6.26486700  | 2.86121100  | 1.16820000  | H  | 1.51119900  | 0.91067000  | -1.44470500 |
| H                                                          | 6.10673000  | 4.12328000  | -0.06368400 | H  | 1.00597600  | -0.63552100 | -2.29980400 |
| H                                                          | 4.75271500  | 3.79538700  | 1.00900000  | C  | -5.44214400 | -0.88324300 | 0.55390500  |
| C                                                          | 3.75583700  | 0.66240300  | 2.70058100  | C  | -6.47909400 | 0.07702500  | 0.39734200  |
| H                                                          | 4.19196600  | 0.02033200  | 3.47982300  | C  | -5.56198500 | -2.14101900 | -0.09260100 |

|   |              |             |             |   |              |             |             |
|---|--------------|-------------|-------------|---|--------------|-------------|-------------|
| C | -7.52665200  | -0.17825300 | -0.49298200 | H | 4.20035056   | -1.51168035 | -3.31012176 |
| C | -6.62663700  | -2.32563900 | -0.99208300 |   |              |             |             |
| C | -7.60625700  | -1.36450000 | -1.22676800 |   |              |             |             |
| H | -8.30700200  | 0.56804000  | -0.61017300 |   |              |             |             |
| H | -6.69684000  | -3.27780500 | -1.51560100 |   |              |             |             |
| C | -4.73131400  | -3.42072400 | 0.15100300  |   |              |             |             |
| H | -4.76232100  | -3.95441400 | -0.80868200 |   |              |             |             |
| C | -5.47378700  | -4.31784800 | 1.16982100  |   |              |             |             |
| H | -6.51539900  | -4.48551000 | 0.87633300  |   |              |             |             |
| H | -4.97806000  | -5.29298400 | 1.24825800  |   |              |             |             |
| H | -5.47204900  | -3.86215200 | 2.16628300  |   |              |             |             |
| C | -3.24350500  | -3.34076100 | 0.53534200  |   |              |             |             |
| H | -2.66843400  | -2.67770600 | -0.11379500 | N | -5.21405100  | -0.39007100 | -0.66747300 |
| H | -3.09012200  | -3.02108900 | 1.56847400  | C | -5.55644800  | 0.96739400  | -0.21515000 |
| H | -2.81279000  | -4.34520200 | 0.44000800  | H | -6.53022000  | 1.22512100  | -0.64449600 |
| H | -1.07328300  | 0.15534100  | 2.21629100  | H | -5.65536700  | 0.97651500  | 0.87782600  |
| H | -3.96751800  | -1.57132000 | 4.84021400  | C | -4.58082800  | 2.04550100  | -0.65809200 |
| C | -8.73151500  | -1.61910600 | -2.22064300 | C | -4.33713300  | -1.19065500 | 0.23107000  |
| H | -8.56447200  | -2.61771800 | -2.64702800 | H | -4.55996600  | -2.24700500 | 0.05076900  |
| C | -10.11157000 | -1.63558400 | -1.53581600 | H | -4.60738500  | -0.95718500 | 1.26502800  |
| H | -10.35266200 | -0.65866200 | -1.10000200 | C | -2.85855900  | -0.93979700 | -0.01157500 |
| H | -10.89843400 | -1.87929700 | -2.25957100 | C | -2.07568700  | -0.38162800 | 0.92952100  |
| H | -10.14595900 | -2.37804600 | -0.73099600 | C | -2.31763900  | 0.12906200  | 2.28092300  |
| C | -8.70402200  | -0.60963500 | -3.38418100 | C | -3.02815700  | -0.35176200 | 3.31989700  |
| H | -8.88041500  | 0.41241800  | -3.02811400 | C | -1.24964400  | 1.18082000  | 2.33207800  |
| H | -7.73583300  | -0.62211200 | -3.89674400 | S | -6.34978100  | -1.20684600 | -1.60601700 |
| H | -9.48287500  | -0.84551400 | -4.11915800 | O | -6.96943800  | -0.19351400 | -2.46976900 |
| C | -6.54922600  | 1.33873800  | 1.25952300  | O | -5.66427600  | -2.37796000 | -2.15800800 |
| H | -5.54928700  | 1.53089100  | 1.65452800  | C | -7.63158800  | -1.81530000 | -0.50097200 |
| C | -7.00019900  | 2.59856600  | 0.49674300  | C | -7.50439600  | -3.08195400 | 0.07597700  |
| H | -8.05906700  | 2.54975500  | 0.21763500  | C | -8.73720200  | -1.01109300 | -0.21192200 |
| H | -6.87694200  | 3.48326000  | 1.13198800  | C | -8.48255100  | -3.52971100 | 0.96180800  |
| H | -6.42207000  | 2.75539700  | -0.41928800 | H | -6.66643400  | -3.71616300 | -0.19226500 |
| C | -7.48031900  | 1.10843300  | 2.47021300  | C | -9.70590300  | -1.47545700 | 0.67618300  |
| H | -7.51923000  | 2.00515700  | 3.10072900  | H | -8.85076500  | -0.05055800 | -0.70292800 |
| H | -8.50101900  | 0.88300400  | 2.13880300  | C | -9.59177400  | -2.73411700 | 1.28355200  |
| H | -7.13774400  | 0.27493200  | 3.09105600  | H | -8.38787700  | -4.51905600 | 1.40289500  |
| C | 4.00198900   | 2.41700900  | -1.33521200 | H | -10.57148200 | -0.85393400 | 0.89257600  |
| H | 3.38998738   | 3.31132627  | -1.26607487 | C | -10.63069400 | -3.21739600 | 2.26751000  |
| C | 3.55433802   | 1.53571250  | -2.42576351 | H | -10.74871900 | -4.30522000 | 2.22406200  |
| O | 2.74561197   | 1.88909666  | -3.27245282 | H | -10.34601400 | -2.96216800 | 3.29705600  |
| O | 4.10077255   | 0.29769245  | -2.41623520 | H | -11.60728800 | -2.76071700 | 2.07676600  |
| C | 3.68832748   | -0.56477718 | -3.48536216 | C | -4.23104000  | 2.05737400  | -2.12070200 |
| H | 2.60410458   | -0.70533838 | -3.47127014 | H | -3.69177600  | 1.13778900  | -2.37176700 |
| H | 3.97804182   | -0.14630495 | -4.45330785 | H | -5.13619600  | 2.05693100  | -2.74083800 |

#### 4-Int3

Zero-point correction= 1.093603 (Hartree/Particle)

Thermal correction to Energy= 1.160164

Thermal correction to Enthalpy= 1.161108

Thermal correction to Gibbs Free Energy= 0.984798

Sum of electronic and zero-point Energies= -3130.031192

Sum of electronic and thermal Energies= -3129.964632

Sum of electronic and thermal Enthalpies= -3129.963687

Sum of electronic and thermal Free Energies= -3130.139997

HF(B3LYP/6-311+G(d,p)/Lanl2dz, SMD[toluene])= -3129.147608

|    |             |             |             |   |             |             |             |
|----|-------------|-------------|-------------|---|-------------|-------------|-------------|
| H  | -3.60066200 | 2.90755100  | -2.39208400 | C | 5.07385100  | -0.82191800 | -0.89164600 |
| C  | -2.34401800 | -1.40421500 | -1.35385000 | C | 6.29630800  | -0.13829400 | -0.64749000 |
| H  | -2.34180600 | -2.50255900 | -1.41552400 | C | 5.01193600  | -2.22317200 | -0.67135000 |
| H  | -2.98257900 | -1.05869900 | -2.17594400 | C | 7.36767700  | -0.82494600 | -0.06747700 |
| H  | -1.32176300 | -1.05422600 | -1.53019600 | C | 6.11477700  | -2.84941800 | -0.06480300 |
| Pd | -0.12341600 | 0.22944000  | 0.86184700  | C | 7.29004800  | -2.17944800 | 0.26485300  |
| P  | 2.24485700  | 0.99235200  | 0.82751600  | H | 8.29171000  | -0.28675200 | 0.12279200  |
| C  | 3.20382700  | 0.18699100  | 2.29385700  | H | 6.05169400  | -3.91755700 | 0.13707200  |
| C  | 2.48914100  | 2.92277400  | 0.82118300  | C | 3.92121400  | -3.21367700 | -1.13722100 |
| C  | 1.40321700  | 3.55818700  | -0.07556900 | H | 3.96958500  | -4.03628300 | -0.41088900 |
| H  | 0.39016600  | 3.27046500  | 0.21912900  | C | 4.33495500  | -3.81605600 | -2.50105400 |
| H  | 1.47581000  | 4.64959400  | 0.01699400  | H | 5.35368000  | -4.21672500 | -2.47159600 |
| H  | 1.54681000  | 3.31660900  | -1.13174500 | H | 3.65400200  | -4.62981500 | -2.77857500 |
| C  | 2.28006000  | 3.48104400  | 2.24343700  | H | 4.29090700  | -3.05994000 | -3.29258800 |
| H  | 2.25787200  | 4.57662900  | 2.18450200  | C | 2.44066800  | -2.79827100 | -1.19483600 |
| H  | 1.32793500  | 3.15886600  | 2.67621600  | H | 2.09778000  | -2.33102300 | -0.26958300 |
| H  | 3.09045000  | 3.21205600  | 2.92585200  | H | 2.22250000  | -2.12067300 | -2.02290300 |
| C  | 3.86238200  | 3.36712300  | 0.29573100  | H | 1.83880100  | -3.70270500 | -1.34696700 |
| H  | 3.92833600  | 4.46286700  | 0.34065900  | H | 0.79742400  | 1.24759100  | -1.36341900 |
| H  | 4.69128900  | 2.96263800  | 0.88058700  | H | 2.99801700  | 0.14940300  | -4.86131000 |
| H  | 3.99923500  | 3.07499700  | -0.74915600 | C | 8.44795000  | -2.91065700 | 0.93071700  |
| C  | 2.39750700  | 0.47570500  | 3.58563400  | H | 8.13486500  | -3.95526900 | 1.06402800  |
| H  | 2.85082300  | -0.10298800 | 4.40112500  | C | 9.71022600  | -2.91742000 | 0.04741900  |
| H  | 2.40895900  | 1.52305800  | 3.88679100  | H | 10.09062900 | -1.90159200 | -0.11331000 |
| H  | 1.35686400  | 0.15467400  | 3.48427700  | H | 10.50953100 | -3.49977900 | 0.52118700  |
| C  | 4.66111800  | 0.62978900  | 2.49681600  | H | 9.50423900  | -3.35628900 | -0.93500800 |
| H  | 4.74045900  | 1.69655000  | 2.72826700  | C | 8.75457800  | -2.33877200 | 2.32812000  |
| H  | 5.08678000  | 0.08249200  | 3.34912500  | H | 9.08845800  | -1.29608800 | 2.26615600  |
| H  | 5.28180200  | 0.41231600  | 1.62626900  | H | 7.86796100  | -2.36752000 | 2.97101300  |
| C  | 3.13943400  | -1.34080700 | 2.10284600  | H | 9.54968300  | -2.91512800 | 2.81619600  |
| H  | 2.10533500  | -1.67999500 | 1.97196500  | C | 6.52123100  | 1.30415200  | -1.10430300 |
| H  | 3.73847500  | -1.68112900 | 1.26084700  | H | 5.54236200  | 1.76578000  | -1.24958100 |
| H  | 3.53469900  | -1.82489400 | 3.00585100  | C | 7.30159500  | 2.16971300  | -0.09716600 |
| C  | 2.77875600  | 0.49768100  | -0.93749300 | H | 8.35347700  | 1.86876300  | -0.02912000 |
| C  | 3.91237200  | -0.11719400 | -1.55226100 | H | 7.28829300  | 3.21789300  | -0.41746500 |
| C  | 1.71538900  | 0.86385600  | -1.80001800 | H | 6.87503200  | 2.11730900  | 0.90930500  |
| C  | 3.94969100  | -0.19691600 | -2.96003000 | C | 7.24285000  | 1.32674300  | -2.46978600 |
| C  | 1.76860900  | 0.75286600  | -3.18720500 | H | 7.38951600  | 2.35943000  | -2.80937200 |
| C  | 2.91651500  | 0.24122700  | -3.78173700 | H | 8.22828600  | 0.85108600  | -2.39721900 |
| H  | 4.82381400  | -0.65607100 | -3.41190000 | H | 6.67097400  | 0.79767400  | -3.23821500 |
| H  | 0.91508600  | 1.06044600  | -3.78477400 | C | -4.12870200 | 2.92633100  | 0.25066200  |
| H  | -2.93272200 | 0.08887400  | 4.31025200  | H | -3.19126814 | 3.44847014  | 0.06963157  |
| H  | -3.65982300 | -1.23145300 | 3.23539800  | C | -4.88427907 | 3.44733020  | 1.42736666  |
| H  | -1.50272000 | 2.13234700  | 1.85821100  | O | -5.13418745 | 4.62715842  | 1.56178516  |
| H  | -0.70085500 | 1.30123600  | 3.26925900  | O | -5.30232953 | 2.58883944  | 2.39684553  |

|                                                            |              |             |             |    |              |             |             |
|------------------------------------------------------------|--------------|-------------|-------------|----|--------------|-------------|-------------|
| C                                                          | -4.71579198  | 1.28742074  | 2.52820054  | H  | -11.80810700 | 1.84955100  | 2.53238200  |
| H                                                          | -4.94146948  | 0.97057043  | 3.54837572  | C  | -2.73581400  | 1.22012400  | -1.03981600 |
| H                                                          | -5.15228382  | 0.57474610  | 1.82333304  | H  | -1.64787300  | 1.16185000  | -1.11733000 |
| H                                                          | -3.63171775  | 1.32066700  | 2.38679448  | H  | -3.17881600  | 0.76844800  | -1.92713500 |
| <b>4-Ts3</b>                                               |              |             |             | H  | -3.03401800  | 2.27739800  | -1.04371300 |
| Zero-point correction= 1.092997 (Hartree/Particle)         |              |             |             | C  | -5.11897100  | -3.47167600 | -1.14028800 |
| Thermal correction to Energy= 1.158338                     |              |             |             | H  | -5.95044800  | -3.73101800 | -0.46768500 |
| Thermal correction to Enthalpy= 1.159282                   |              |             |             | H  | -5.48498400  | -3.63829800 | -2.16428400 |
| Thermal correction to Gibbs Free Energy= 0.989543          |              |             |             | H  | -4.30295600  | -4.17542200 | -0.95673000 |
| Sum of electronic and zero-point Energies= -3129.991191    |              |             |             | Pd | -0.22518200  | -1.68936000 | 0.49041500  |
| Sum of electronic and thermal Energies= -3129.925850       |              |             |             | P  | 2.08476200   | -1.40915400 | -0.35664800 |
| Sum of electronic and thermal Enthalpies= -3129.924906     |              |             |             | C  | 2.19697400   | -0.10299100 | -1.76629500 |
| Sum of electronic and thermal Free Energies= -3130.094645  |              |             |             | C  | 2.72536600   | -3.14087700 | -0.98594500 |
| HF(B3LYP/6-311+G(d,p)/LanL2dz, SMD[toluene])= -3129.116045 |              |             |             | C  | 2.27500100   | -4.22914500 | 0.01372100  |
| Imaginary frequency is -280.13 <sup>-1</sup>               |              |             |             | H  | 2.76355300   | -4.12159000 | 0.98549000  |
| N                                                          | -5.47506900  | 0.33091300  | -0.88494000 | H  | 1.19288100   | -4.22373800 | 0.16959100  |
| C                                                          | -4.76061200  | 0.59144400  | 0.37063500  | H  | 2.55868600   | -5.21065800 | -0.38858200 |
| H                                                          | -5.01062300  | 1.61028600  | 0.68622800  | C  | 2.10832500   | -3.48131700 | -2.35775000 |
| H                                                          | -5.09621300  | -0.09404600 | 1.15873200  | H  | 2.36827900   | -4.51839400 | -2.60721100 |
| C                                                          | -3.24837200  | 0.53719900  | 0.21016700  | H  | 1.01877300   | -3.40696400 | -2.35505700 |
| C                                                          | -5.80307400  | -1.06241500 | -1.20378300 | H  | 2.49926100   | -2.85212700 | -3.16122800 |
| H                                                          | -6.09478500  | -1.10064200 | -2.25878000 | C  | 4.25426000   | -3.22375200 | -1.09431800 |
| H                                                          | -6.68336100  | -1.39329300 | -0.61893900 | H  | 4.53479600   | -4.21238800 | -1.48276900 |
| C                                                          | -4.66662100  | -2.03165000 | -0.94064500 | H  | 4.67054300   | -2.47497200 | -1.76926400 |
| C                                                          | -3.44136400  | -1.66780900 | -0.55868800 | H  | 4.72509000   | -3.11130700 | -0.11504900 |
| C                                                          | -2.37068300  | -2.49649600 | -0.17496600 | C  | 0.99812500   | -0.34118400 | -2.71618400 |
| C                                                          | -2.04406700  | -2.72315500 | 1.19694900  | H  | 0.99342900   | 0.46274300  | -3.46345600 |
| C                                                          | -1.19103000  | -2.85593400 | -0.97644600 | H  | 1.04912100   | -1.28724600 | -3.25694700 |
| S                                                          | -6.54280100  | 1.50279200  | -1.44048200 | H  | 0.04630700   | -0.30370600 | -2.17887000 |
| O                                                          | -5.93817100  | 2.80324700  | -1.12898600 | C  | 3.49741800   | -0.09907400 | -2.58750500 |
| O                                                          | -6.89701400  | 1.12670800  | -2.81167500 | H  | 3.64404900   | -1.03086800 | -3.14169200 |
| C                                                          | -8.03872800  | 1.36638700  | -0.45121900 | H  | 3.44434400   | 0.71082800  | -3.32756200 |
| C                                                          | -9.04753300  | 0.48103200  | -0.84053500 | H  | 4.37665300   | 0.08366700  | -1.96802500 |
| C                                                          | -8.17225900  | 2.12696600  | 0.71354800  | C  | 1.98072000   | 1.28558300  | -1.13474000 |
| C                                                          | -10.18602600 | 0.35081900  | -0.04647400 | H  | 1.07564100   | 1.32826800  | -0.52324400 |
| H                                                          | -8.95116000  | -0.07190300 | -1.76873700 | H  | 2.82776400   | 1.59497800  | -0.52564100 |
| C                                                          | -9.31770900  | 1.98490900  | 1.49449700  | H  | 1.87207000   | 2.02040200  | -1.94391600 |
| H                                                          | -7.40127400  | 2.84100300  | 0.98240000  | C  | 3.20547100   | -1.11691500 | 1.16094300  |
| C                                                          | -10.33723300 | 1.09165400  | 1.13420700  | C  | 4.41283900   | -0.39857800 | 1.44188300  |
| H                                                          | -10.97526700 | -0.33060000 | -0.35507100 | C  | 2.66709900   | -1.88595000 | 2.21845600  |
| H                                                          | -9.42681800  | 2.58592000  | 2.39419700  | C  | 5.03713900   | -0.61393700 | 2.68775700  |
| C                                                          | -11.56120400 | 0.92317800  | 2.00320900  | C  | 3.29464300   | -2.06183700 | 3.44850800  |
| H                                                          | -12.43409300 | 0.62485800  | 1.41331700  | H  | 1.70067100   | -2.36091000 | 2.07711700  |
| H                                                          | -11.40074100 | 0.14692600  | 2.76346500  | C  | 4.51691400   | -1.44126600 | 3.67748500  |
|                                                            |              |             |             | H  | 5.95418500   | -0.06818400 | 2.88759300  |

|   |             |             |             |                                                            |             |             |             |
|---|-------------|-------------|-------------|------------------------------------------------------------|-------------|-------------|-------------|
| H | 2.82026900  | -2.67024200 | 4.21334500  | H                                                          | -1.54158739 | 0.99804422  | 1.40045790  |
| H | -1.48322900 | -3.61820100 | 1.46710700  | C                                                          | -2.91542559 | 0.00381077  | 2.67471727  |
| H | -2.66422900 | -2.30538600 | 1.98270500  | O                                                          | -2.03608199 | -0.07616814 | 3.71334008  |
| H | -0.83771600 | -3.88111000 | -0.85986400 | O                                                          | -4.08840840 | -0.31794080 | 2.97850754  |
| H | -1.14426700 | -2.48950300 | -2.00045000 | C                                                          | -0.87104072 | 0.75158061  | 3.79571547  |
| H | 5.04159800  | -1.56265100 | 4.62125000  | H                                                          | 0.02219061  | 0.12283535  | 3.78017105  |
| C | 5.08645300  | 0.68624700  | 0.62776400  | H                                                          | -0.83776953 | 1.46177968  | 2.96690121  |
| C | 6.19998400  | 0.39439500  | -0.20990600 | H                                                          | -0.92350324 | 1.28362604  | 4.75074195  |
| C | 4.72574200  | 2.04548800  | 0.83094800  |                                                            |             |             |             |
| C | 6.79553100  | 1.41928200  | -0.95244400 | <b>4-Int4</b>                                              |             |             |             |
| C | 5.34538600  | 3.02444700  | 0.03397100  | Zero-point correction= 1.096969 (Hartree/Particle)         |             |             |             |
| C | 6.35585500  | 2.74279800  | -0.88055600 | Thermal correction to Energy= 1.161789                     |             |             |             |
| H | 7.63404200  | 1.17605300  | -1.59852700 | Thermal correction to Enthalpy= 1.162733                   |             |             |             |
| H | 5.03353800  | 4.05988400  | 0.16130500  | Thermal correction to Gibbs Free Energy= 0.993953          |             |             |             |
| C | 6.97802000  | 3.84468100  | -1.72734500 | Sum of electronic and zero-point Energies= -3130.084462    |             |             |             |
| H | 6.46378300  | 4.77987800  | -1.46668500 | Sum of electronic and thermal Energies= -3130.019641       |             |             |             |
| C | 6.75680200  | 3.59996000  | -3.23227200 | Sum of electronic and thermal Enthalpies= -3130.018697     |             |             |             |
| H | 7.25902900  | 2.68314200  | -3.56361600 | Sum of electronic and thermal Free Energies= -3130.187478  |             |             |             |
| H | 5.69089800  | 3.49918800  | -3.46457900 | HF(B3LYP/6-311+G(d,p)/LanL2dz, SMD[toluene])= -3129.138454 |             |             |             |
| H | 7.15808900  | 4.43221300  | -3.82297900 | N                                                          | 5.73507700  | 0.10488300  | -1.45491500 |
| C | 8.47383000  | 4.03877100  | -1.41331500 | C                                                          | 4.68765000  | -0.42656400 | -0.57857300 |
| H | 8.88415700  | 4.87563900  | -1.99108600 | H                                                          | 4.54196800  | -1.47900500 | -0.81926800 |
| H | 8.63141700  | 4.24828700  | -0.34960900 | H                                                          | 4.97189200  | -0.33295800 | 0.48306300  |
| H | 9.05460400  | 3.14399200  | -1.66742500 | C                                                          | 3.36823600  | 0.34897500  | -0.83092200 |
| C | 3.83547400  | 2.64052500  | 1.94427900  | C                                                          | 6.05378300  | 1.52264000  | -1.28272800 |
| H | 3.41864900  | 3.55710300  | 1.50441700  | H                                                          | 6.46572700  | 1.89394900  | -2.22661800 |
| C | 4.75007600  | 3.09385300  | 3.10839300  | H                                                          | 6.84441000  | 1.66662600  | -0.52036900 |
| H | 5.56091100  | 3.74288500  | 2.76082100  | C                                                          | 4.86883000  | 2.36705500  | -0.86290200 |
| H | 4.16533100  | 3.64385500  | 3.85572000  | C                                                          | 3.65162400  | 1.84671100  | -0.58988600 |
| H | 5.20028400  | 2.22895000  | 3.60904800  | C                                                          | 2.52694300  | 2.65587200  | -0.04112800 |
| C | 2.63881300  | 1.86487700  | 2.51317500  | C                                                          | 2.71015400  | 3.53339200  | 0.96910300  |
| H | 1.96055600  | 1.48421600  | 1.75186000  | C                                                          | 1.16441500  | 2.42256500  | -0.58384600 |
| H | 2.93919200  | 1.02955600  | 3.14915900  | S                                                          | 7.01514500  | -0.89811500 | -1.87684200 |
| H | 2.05704100  | 2.55227900  | 3.13993700  | O                                                          | 6.44474800  | -2.21026200 | -2.18504000 |
| C | 6.86355200  | -0.98346100 | -0.23920700 | O                                                          | 7.81375300  | -0.14797100 | -2.85138200 |
| C | 7.28930600  | -1.44753600 | -1.64564000 | C                                                          | 8.02358700  | -1.08899800 | -0.40007500 |
| H | 7.58682000  | -2.50222100 | -1.61861800 | C                                                          | 9.09768800  | -0.22451400 | -0.17613300 |
| H | 6.48413400  | -1.34004600 | -2.37898700 | C                                                          | 7.70818900  | -2.08667600 | 0.52760800  |
| H | 8.15147000  | -0.88107200 | -2.01615200 | C                                                          | 9.85010700  | -0.35759900 | 0.99100000  |
| C | 8.09210600  | -1.00388300 | 0.69746900  | H                                                          | 9.35472100  | 0.51763200  | -0.92434600 |
| H | 8.84176000  | -0.27270900 | 0.37236400  | C                                                          | 8.47022800  | -2.20457200 | 1.68776800  |
| H | 7.81889500  | -0.76588800 | 1.72994100  | H                                                          | 6.89561900  | -2.77587500 | 0.32329600  |
| H | 8.56172500  | -1.99533900 | 0.69255000  | C                                                          | 9.54647500  | -1.34073800 | 1.94225400  |
| H | 6.15036500  | -1.70977400 | 0.15354900  | H                                                          | 10.69360600 | 0.30758400  | 1.15999200  |
| C | -2.48383300 | 0.45641700  | 1.37095800  | H                                                          | 8.23257100  | -2.98792600 | 2.40376400  |

|    |             |             |             |   |              |             |             |
|----|-------------|-------------|-------------|---|--------------|-------------|-------------|
| C  | 10.34863000 | -1.46337400 | 3.21645400  | H | -0.93017200  | 0.06616200  | 2.36765300  |
| H  | 11.34401500 | -1.02076500 | 3.10816600  | C | -3.33855200  | -2.00818200 | 3.47833200  |
| H  | 9.84946700  | -0.94835600 | 4.04822300  | H | -5.17578300  | -2.37853600 | 2.44662000  |
| H  | 10.47244400 | -2.51068200 | 3.51280200  | H | -1.36412600  | -1.48085300 | 4.18814600  |
| C  | 2.92796800  | 0.09426800  | -2.29575000 | H | 1.88100500   | 4.11694100  | 1.36323700  |
| H  | 1.99901300  | 0.61981500  | -2.52874800 | H | 3.67498100   | 3.67796100  | 1.44338000  |
| H  | 3.70320500  | 0.42863800  | -2.98980600 | H | 0.47285200   | 3.20794900  | -0.27754600 |
| H  | 2.76155200  | -0.97503100 | -2.45102100 | H | 1.14516200   | 2.30576200  | -1.66919700 |
| C  | 5.24644300  | 3.82994100  | -0.78917300 | H | -3.55748100  | -2.71242700 | 4.27628200  |
| H  | 5.86571100  | 4.04862700  | 0.09274200  | C | -5.13211400  | -0.98103400 | 0.33608900  |
| H  | 5.84739600  | 4.10675800  | -1.66599700 | C | -6.32698200  | -0.22171600 | 0.48128600  |
| H  | 4.37162100  | 4.48049700  | -0.74899500 | C | -5.05470600  | -1.94215900 | -0.70577100 |
| Pd | 0.32704900  | 0.66145200  | 0.13422800  | C | -7.33209200  | -0.32294400 | -0.48558200 |
| P  | -2.09193400 | 1.27944800  | 0.32840100  | C | -6.08531200  | -1.97266600 | -1.66175700 |
| C  | -2.89756700 | 1.57221500  | -1.39764300 | C | -7.21819500  | -1.16687500 | -1.59271600 |
| C  | -2.39146500 | 2.82382900  | 1.49131800  | H | -8.23278600  | 0.27217000  | -0.36631400 |
| C  | -1.33043300 | 2.79352500  | 2.61470200  | H | -6.00207300  | -2.68295900 | -2.48278600 |
| H  | -1.48640500 | 1.96188200  | 3.30618000  | C | -8.29726500  | -1.23647700 | -2.66466300 |
| H  | -0.31164500 | 2.72644800  | 2.22012500  | H | -7.97072200  | -1.98235000 | -3.40215200 |
| H  | -1.41247800 | 3.71923500  | 3.19962100  | C | -8.45223200  | 0.10655900  | -3.40362100 |
| C  | -2.20905600 | 4.15184400  | 0.72764900  | H | -8.79289000  | 0.89698900  | -2.72412300 |
| H  | -2.27733300 | 4.97464200  | 1.45114600  | H | -7.50148600  | 0.42965800  | -3.84174900 |
| H  | -1.23277600 | 4.22997100  | 0.24214000  | H | -9.18891200  | 0.02073100  | -4.21127000 |
| H  | -2.98548800 | 4.31982300  | -0.02216000 | C | -9.64696500  | -1.71251600 | -2.09430200 |
| C  | -3.78183200 | 2.82602500  | 2.14348600  | H | -10.39005600 | -1.81152200 | -2.89447300 |
| H  | -3.87773000 | 3.71183100  | 2.78630900  | H | -9.54750000  | -2.68441300 | -1.59863200 |
| H  | -4.58608700 | 2.86625300  | 1.40606000  | H | -10.04349200 | -1.00138600 | -1.35976300 |
| H  | -3.93035200 | 1.94548100  | 2.77367800  | C | -4.04192600  | -3.09700600 | -0.86349100 |
| C  | -2.00782000 | 2.57309300  | -2.17480600 | H | -3.99249200  | -3.27857100 | -1.94562200 |
| H  | -2.40988100 | 2.65697200  | -3.19269800 | C | -4.64528900  | -4.37559100 | -0.23374100 |
| H  | -1.99461300 | 3.57659400  | -1.74968300 | H | -5.64905800  | -4.58040200 | -0.61996400 |
| H  | -0.97904200 | 2.21554700  | -2.25326800 | H | -4.01015500  | -5.24272600 | -0.45162800 |
| C  | -4.34711800 | 2.08368800  | -1.39914400 | H | -4.71559900  | -4.27767200 | 0.85557800  |
| H  | -4.44039000 | 3.06760500  | -0.92944400 | C | -2.58534900  | -2.94818500 | -0.39671900 |
| H  | -4.68649700 | 2.18948900  | -2.43852500 | H | -2.10702900  | -2.04176700 | -0.77194300 |
| H  | -5.02919700 | 1.39446200  | -0.90161800 | H | -2.49086400  | -2.95876300 | 0.69097100  |
| C  | -2.80604700 | 0.24472900  | -2.17578100 | H | -2.01691000  | -3.80269700 | -0.78373500 |
| H  | -1.78158400 | -0.14461700 | -2.18084800 | C | -6.60618100  | 0.63219700  | 1.71971900  |
| H  | -3.47645600 | -0.51481700 | -1.77917700 | C | -7.24954800  | 1.99694000  | 1.40656100  |
| H  | -3.09656900 | 0.42758800  | -3.21868800 | H | -7.26976400  | 2.61730300  | 2.31003900  |
| C  | -2.83670800 | -0.13773000 | 1.37479200  | H | -6.70288800  | 2.54287200  | 0.63116500  |
| C  | -4.04312500 | -0.90728400 | 1.38347300  | H | -8.28644800  | 1.89046600  | 1.06778800  |
| C  | -1.89783800 | -0.42479800 | 2.39456200  | C | -7.50001900  | -0.14082800 | 2.71434500  |
| C  | -4.25457400 | -1.80385800 | 2.45202800  | H | -8.46848800  | -0.38336400 | 2.26095900  |
| C  | -2.12972400 | -1.32250100 | 3.43365300  | H | -7.03510000  | -1.07923000 | 3.03190400  |

|                                                            |             |             |             |    |             |             |             |
|------------------------------------------------------------|-------------|-------------|-------------|----|-------------|-------------|-------------|
| H                                                          | -7.68783400 | 0.46298900  | 3.61064800  | H  | 5.25973000  | -3.24313800 | 0.47770700  |
| H                                                          | -5.65484100 | 0.81991800  | 2.22123600  | C  | 8.33428900  | -2.90715100 | 1.94081800  |
| C                                                          | 2.30715600  | -0.11997500 | 0.17640500  | H  | 9.97812000  | -1.81966500 | 1.06788500  |
| C                                                          | 2.60777738  | 0.06279366  | 1.61328024  | H  | 6.51355300  | -3.91131800 | 2.51304100  |
| O                                                          | 3.61780579  | 0.47001261  | 2.15753982  | C  | 9.10913700  | -3.35321700 | 3.15827500  |
| O                                                          | 1.52192725  | -0.36552429 | 2.36370853  | H  | 9.55563000  | -4.34373000 | 2.99874700  |
| C                                                          | 1.66162717  | -0.20233929 | 3.78159447  | H  | 9.92532400  | -2.66141200 | 3.39036900  |
| H                                                          | 2.55884874  | -0.70697528 | 4.14642369  | H  | 8.46343300  | -3.42715600 | 4.03978800  |
| H                                                          | 1.72630255  | 0.85998815  | 4.03635339  | C  | 2.36865700  | 0.73939500  | -1.94252200 |
| H                                                          | 0.76684263  | -0.64597151 | 4.21903413  | H  | 1.76384300  | 1.61614500  | -2.19244800 |
| H                                                          | 2.21299642  | -1.17450385 | 0.02147640  | H  | 3.05987100  | 0.54836800  | -2.76903000 |
| <b>4-Ts4</b>                                               |             |             |             | H  | 1.70837200  | -0.12073100 | -1.82187400 |
| Zero-point correction= 1.095303 (Hartree/Particle)         |             |             |             | C  | 6.16950300  | 3.53972300  | -1.03519700 |
| Thermal correction to Energy= 1.160156                     |             |             |             | H  | 5.66510400  | 4.39819300  | -0.58613500 |
| Thermal correction to Enthalpy= 1.161101                   |             |             |             | H  | 7.10887800  | 3.36433200  | -0.49312300 |
| Thermal correction to Gibbs Free Energy= 0.989614          |             |             |             | H  | 6.44883400  | 3.81295500  | -2.06252100 |
| Sum of electronic and zero-point Energies= -3130.066892    |             |             |             | Pd | 0.17970900  | 2.12893100  | 0.33142300  |
| Sum of electronic and thermal Energies= -3130.002039       |             |             |             | P  | -2.16548900 | 1.76792000  | 0.00692000  |
| Sum of electronic and thermal Enthalpies= -3130.001094     |             |             |             | C  | -2.45542500 | 1.11706700  | -1.78151100 |
| Sum of electronic and thermal Free Energies= -3130.172581  |             |             |             | C  | -3.14954900 | 3.43379800  | 0.27231100  |
| HF(B3LYP/6-311+G(d,p)/LanL2dz, SMD[toluene])= -3129.190934 |             |             |             | C  | -2.59793400 | 4.14083700  | 1.53008300  |
| Imaginary frequency is -368.12 <sup>-1</sup>               |             |             |             | H  | -2.82896200 | 3.59554200  | 2.44832100  |
| N                                                          | 5.22697700  | -0.14352900 | -1.36472900 | H  | -1.51258700 | 4.27908900  | 1.47380500  |
| C                                                          | 4.13051500  | -0.19978300 | -0.39253900 | H  | -3.06730500 | 5.13049100  | 1.61078900  |
| H                                                          | 3.59336100  | -1.13940400 | -0.52219000 | C  | -2.90320900 | 4.38270900  | -0.91754200 |
| H                                                          | 4.52514700  | -0.15246800 | 0.63693600  | H  | -3.31840700 | 5.36897400  | -0.67181700 |
| C                                                          | 3.17601500  | 0.98804600  | -0.65171200 | H  | -1.83501300 | 4.51472200  | -1.12085600 |
| C                                                          | 6.09537200  | 1.02728200  | -1.22834000 | H  | -3.39487100 | 4.04712500  | -1.83374600 |
| H                                                          | 6.69065400  | 1.11284600  | -2.14292700 | C  | -4.66116200 | 3.23753700  | 0.46540400  |
| H                                                          | 6.81044400  | 0.90634800  | -0.39114400 | H  | -5.14196300 | 4.21710900  | 0.59497600  |
| C                                                          | 5.30885900  | 2.30155900  | -1.00913000 | H  | -5.13508100 | 2.74934300  | -0.38852900 |
| C                                                          | 3.98187800  | 2.27955100  | -0.78460100 | H  | -4.87238000 | 2.64821100  | 1.36192900  |
| C                                                          | 3.09497300  | 3.44102200  | -0.55997200 | C  | -1.57781100 | 1.96484000  | -2.73464600 |
| C                                                          | 3.09106700  | 4.55809300  | -1.30602000 | H  | -1.59126000 | 1.48766600  | -3.72323400 |
| C                                                          | 2.10000900  | 3.22321700  | 0.54123000  | H  | -1.93281400 | 2.98807100  | -2.86218600 |
| S                                                          | 5.98183100  | -1.59209600 | -1.78850900 | H  | -0.53964600 | 2.00144200  | -2.39005500 |
| O                                                          | 4.91314700  | -2.56716500 | -2.00988000 | C  | -3.90304200 | 1.11279300  | -2.29797200 |
| O                                                          | 6.95375400  | -1.24873300 | -2.83005000 | H  | -4.32207200 | 2.12110500  | -2.37244400 |
| C                                                          | 6.91024100  | -2.13064600 | -0.34699400 | H  | -3.91957200 | 0.68148400  | -3.30819700 |
| C                                                          | 8.24119600  | -1.73433000 | -0.19245600 | H  | -4.55983700 | 0.50416900  | -1.67405100 |
| C                                                          | 6.28386600  | -2.91685400 | 0.62462600  | C  | -1.88780300 | -0.31374300 | -1.82283100 |
| C                                                          | 8.94088400  | -2.12370100 | 0.94914700  | H  | -1.81787600 | -0.63773900 | -2.86994800 |
| H                                                          | 8.72323400  | -1.15139700 | -0.96999300 | H  | -0.88816100 | -0.37693900 | -1.38157000 |
| C                                                          | 6.99865300  | -3.29607300 | 1.75894600  | H  | -0.57140600 | -3.61090700 | 0.02375600  |
|                                                            |             |             |             | C  | -2.87558400 | 0.69430000  | 1.41626900  |





|   |             |             |             |   |             |             |             |
|---|-------------|-------------|-------------|---|-------------|-------------|-------------|
| C | -4.72716800 | 0.60169500  | -0.88842500 | H | 1.65669900  | 3.84640200  | -1.80859400 |
| H | -3.74903900 | 1.85930900  | 0.57329700  | H | -0.00834600 | 4.07868500  | -1.23538300 |
| C | -3.93042200 | -1.66684500 | -1.02309900 | H | 1.35024700  | 4.55431600  | -0.21748000 |
| H | -2.32962600 | -2.18856600 | 0.32965800  | H | 5.04616300  | 2.81962100  | -1.68132700 |
| C | -4.80956000 | -0.67002000 | -1.47172000 | H | 3.69334800  | 3.83621200  | -0.94773200 |
| H | -5.41446600 | 1.38173000  | -1.20686100 | H | 4.27911400  | 0.21121600  | -2.26838300 |
| H | -3.99368200 | -2.66599600 | -1.44750000 | H | 4.81116100  | 0.11738000  | -0.59600200 |
| C | -5.81093400 | -0.95872600 | -2.56454100 | C | 2.79619300  | -0.63606400 | -0.88489600 |
| H | -6.67691300 | -0.29218500 | -2.50149700 | C | 2.29644873  | -1.43289869 | -2.07416885 |
| H | -5.36182500 | -0.81859700 | -3.55683600 | O | 2.85740003  | -1.54548144 | -3.14261752 |
| H | -6.17148900 | -1.99151400 | -2.51517000 | O | 1.11939247  | -2.03994844 | -1.78735260 |
| C | 2.57846400  | 0.02193300  | 1.59741200  | C | 0.57395848  | -2.85708430 | -2.83826538 |
| H | 3.60907900  | 0.39005900  | 1.60775300  | H | 1.26621606  | -3.66215338 | -3.09762074 |
| H | 1.99585600  | 0.61368900  | 2.30797500  | H | -0.35547371 | -3.26434845 | -2.43954992 |
| H | 2.58510800  | -1.01671300 | 1.94793100  | H | 0.38000150  | -2.25428310 | -3.72928182 |
| C | 1.00582600  | 3.79254600  | -0.93068700 | H | 3.40247868  | -1.46141894 | -0.57488487 |



(b) Product 4i

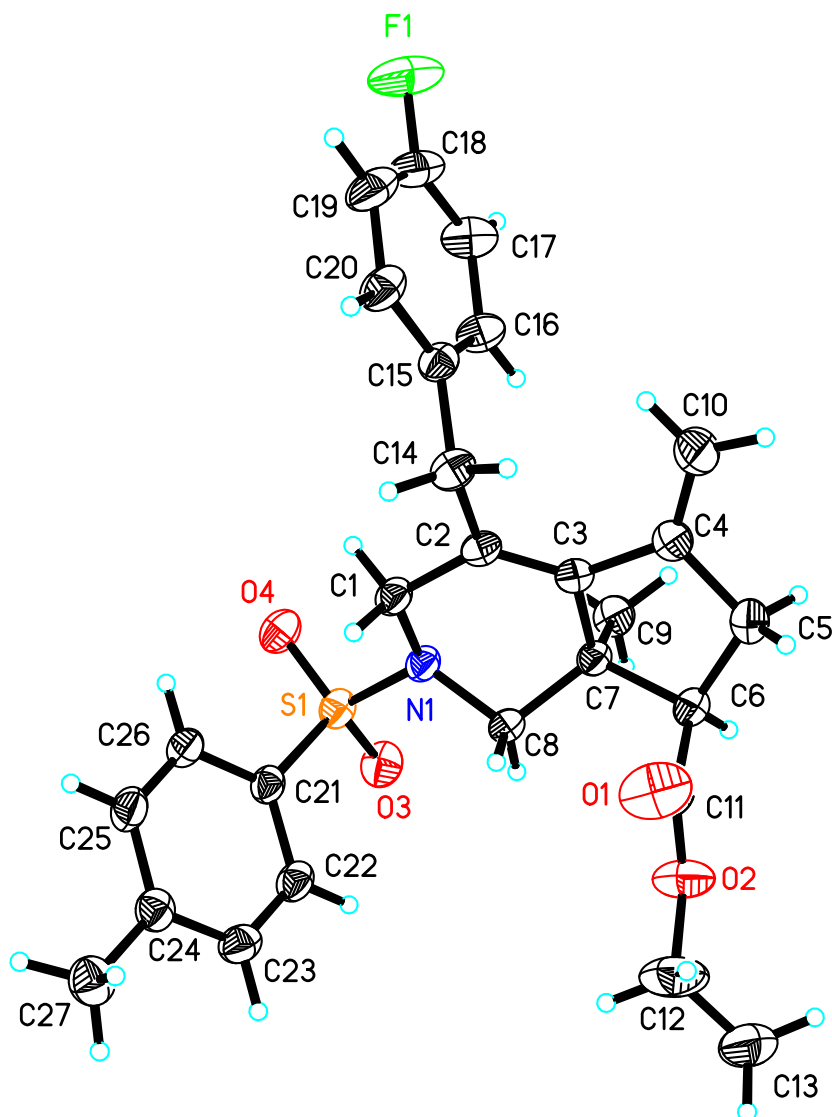

The crystal data of **4i** have been deposited in CCDC with number 2328425. Empirical Formula:  $C_{27}H_{30}FNO_4S$ ; Formula Weight: 483.58; Crystal Color, Habit: colorless; Crystal Dimensions: 0.200 x 0.160 x 0.120 mm<sup>3</sup>; Crystal System: Triclinic; Lattice Parameters:  $a = 8.8399(3)$  Å,  $\alpha = 71.0650(10)$  deg.  $b = 10.9638(5)$  Å,  $\beta = 82.3880(10)$  deg.  $c = 14.6620(6)$  Å,  $\gamma = 67.8040(10)$  deg.;  $V = 1244.45(9)$  Å<sup>3</sup>; Space group: P -1;  $Z = 2$ ;  $D_{calc} = 1.291$  g/cm<sup>3</sup>;  $F_{000} = 512$ ; Diffractometer: Rigaku AFC7R; Residuals: R;  $R_w = 0.0438, 0.1010$ .

## 9. References

- [1] S. Yang, K. H. Rui, X. Y. Tang, Q. Xu, M. Shi, *J. Am. Chem. Soc.*, **2017**, *16*, 5957-5964.
- [2] S. Yang, Q.-Z. Li, C. Xu, Q. Xu, M. Shi, *Chem. Sci.* **2018**, *9*, 5074–5081.
- [3] C. Xu, C. Ning, S. Yang, Y. Wei, M. Shi, *Adv. Synth. Catal.* 2021, **363**, 1727–1732.
- [4] Gaussian 16, Revision A.03, Frisch, M. J.; Trucks, G. W.; Schlegel, H. B.; Scuseria, G. E.; Robb, M. A.; Cheeseman, J. R.; Scalmani, G.; Barone, V.; Petersson, G. A.; Nakatsuji, H.; Li, X.; Caricato, M.; Marenich, A. V.; Bloino, J.; Janesko, B. G.; Gomperts, R.; Mennucci, B.; Hratchian, H. P.; Ortiz, J. V.; Izmaylov, A. F.; Sonnenberg, J. L.; Williams-Young, D.; Ding, F.; Lipparini, F.; Egidi, F.; Goings, J.; Peng, B.; Petrone, A.; Henderson, T.; Ranasinghe, D.; Zakrzewski, V. G.; Gao, J.; Rega, N.; Zheng, G.; Liang, W.; Hada, M.; Ehara, M.; Toyota, K.; Fukuda, R.; Hasegawa, J.; Ishida, M.; Nakajima, T.; Honda, Y.; Kitao, O.; Nakai, H.; Vreven, T.; Throssell, K.; Montgomery, J. A.; Jr., Peralta, J. E.; Ogliaro, F.; Bearpark, M. J.; Heyd, J. J.; Brothers, E. N.; Kudin, K. N.; Staroverov, V. N.; Keith, T. A.; Kobayashi, R.; Normand, J.; Raghavachari, K.; Rendell, A. P.; Burant, J. C.; Iyengar, S. S.; Tomasi, J.; Cossi, M.; Millam, J. M.; Klene, M.; Adamo, C.; Cammi, R.; Ochterski, J. W.; Martin, R. L.; Morokuma, K.; Farkas, O.; Foresman, J. B.; and Fox, D. J. Gaussian, Inc., Wallingford CT, 2016.
